# Supplementary material for: Intraspecific variation in feeding strategies of Galapagos sea lions: A case of trophic specialization
Source: PLoS One. 2017 Oct 23;12(10):e0185165. doi: 10.1371/journal.pone.0185165 (PMC5653192; doi:10.1371/journal.pone.0185165)
Supplement: S1 File — (XLS) [file pone.0185165.s001.xls]

## Sheet: SCF01_GPS_filtered
40114.7	2009-10-28 11:52:03	-0.90237	-89.6145	1	109	10	29	17	51	59
40114.8	2009-10-28 12:35:03	-0.90239	-89.6139	1	109	10	29	18	35	0
40114.8	2009-10-28 12:50:03	-0.90189	-89.6146	1	109	10	29	18	49	59
40114.8	2009-10-28 13:05:03	-0.90207	-89.6143	1	109	10	29	19	5	0
40114.8	2009-10-28 13:20:03	-0.90175	-89.6147	1	109	10	29	19	20	0
40114.8	2009-10-28 13:50:03	-0.90182	-89.6145	1	109	10	29	19	50	0
40114.8	2009-10-28 14:05:03	-0.90178	-89.6146	1	109	10	29	20	5	0
40114.8	2009-10-28 14:20:03	-0.90203	-89.6146	1	109	10	29	20	19	59
40114.9	2009-10-28 14:35:03	-0.90197	-89.6146	1	109	10	29	20	35	0
40114.9	2009-10-28 14:50:03	-0.90186	-89.6144	1	109	10	29	20	50	0
40114.9	2009-10-28 15:05:03	-0.90205	-89.6145	1	109	10	29	21	4	59
40114.9	2009-10-28 15:20:03	-0.90189	-89.6145	1	109	10	29	21	20	0
40114.9	2009-10-28 15:35:03	-0.90193	-89.6145	1	109	10	29	21	35	0
40114.9	2009-10-28 15:50:03	-0.9019	-89.6144	1	109	10	29	21	49	59
40114.9	2009-10-28 16:05:03	-0.90209	-89.6144	1	109	10	29	22	5	0
40114.9	2009-10-28 16:20:03	-0.90197	-89.6147	1	109	10	29	22	20	0
40114.9	2009-10-28 16:35:03	-0.9019	-89.6144	1	109	10	29	22	34	59
40115	2009-10-28 16:50:03	-0.90195	-89.6143	1	109	10	29	22	50	0
40115	2009-10-28 17:05:03	-0.90195	-89.6145	1	109	10	29	23	5	0
40115	2009-10-28 17:20:03	-0.90198	-89.6144	1	109	10	29	23	19	59
40115	2009-10-28 17:35:03	-0.90198	-89.6144	1	109	10	29	23	35	0
40115	2009-10-28 17:50:03	-0.90153	-89.6144	1	109	10	29	23	50	0
40115	2009-10-28 18:05:03	-0.90189	-89.6144	1	109	10	30	0	4	59
40115	2009-10-28 18:20:03	-0.90193	-89.6144	1	109	10	30	0	20	0
40115	2009-10-28 18:35:03	-0.90189	-89.6143	1	109	10	30	0	35	0
40115	2009-10-28 18:50:03	-0.90202	-89.6144	1	109	10	30	0	49	59
40115	2009-10-28 19:05:03	-0.90187	-89.6146	1	109	10	30	1	5	0
40115.1	2009-10-28 19:20:03	-0.9021	-89.6147	1	109	10	30	1	20	0
40115.1	2009-10-28 19:35:03	-0.90235	-89.6149	1	109	10	30	1	34	59
40115.1	2009-10-28 19:50:03	-0.90211	-89.6147	1	109	10	30	1	50	0
40115.1	2009-10-28 20:35:03	-0.90197	-89.6147	1	109	10	30	2	35	0
40115.1	2009-10-28 21:35:03	-0.90206	-89.6145	1	109	10	30	3	35	0
40115.2	2009-10-28 21:50:03	-0.90163	-89.6149	1	109	10	30	3	49	59
40115.2	2009-10-28 22:05:03	-0.90222	-89.6146	1	109	10	30	4	5	0
40115.2	2009-10-28 22:20:03	-0.9022	-89.6147	1	109	10	30	4	20	0
40115.2	2009-10-28 22:35:03	-0.90224	-89.6145	1	109	10	30	4	34	59
40115.2	2009-10-28 22:50:03	-0.90243	-89.6142	1	109	10	30	4	50	0
40115.2	2009-10-28 23:05:03	-0.90217	-89.6146	1	109	10	30	5	5	0
40115.2	2009-10-28 23:20:03	-0.90209	-89.6146	1	109	10	30	5	19	59
40115.3	2009-10-29 02:05:03	-0.90202	-89.6145	1	109	10	30	8	5	0
40115.4	2009-10-29 03:05:03	-0.90204	-89.6147	1	109	10	30	9	4	59
40115.4	2009-10-29 03:20:03	-0.90215	-89.6148	1	109	10	30	9	20	0
40115.4	2009-10-29 03:35:03	-0.90219	-89.615	1	109	10	30	9	35	0
40115.6	2009-10-29 07:32:04	-0.63579	-89.5263	1	109	10	30	13	32	0
40115.6	2009-10-29 08:01:57	-0.59584	-89.5276	1	109	10	30	14	1	53
40115.7	2009-10-29 10:04:25	-0.55724	-89.5393	1	109	10	30	16	4	22
40115.8	2009-10-29 13:06:27	-0.55707	-89.5842	1	109	10	30	19	6	23
40115.9	2009-10-29 16:40:06	-0.5607	-89.5841	1	109	10	30	22	40	3
40116.1	2009-10-29 19:43:18	-0.56455	-89.5849	1	109	10	31	1	43	14
40116.3	2009-10-30 01:39:56	-0.72698	-89.5637	1	109	10	31	7	39	52
40116.4	2009-10-30 02:37:03	-0.74545	-89.5672	1	109	10	31	8	37	0
40116.4	2009-10-30 02:52:28	-0.75224	-89.5673	1	109	10	31	8	52	24
40116.4	2009-10-30 03:22:32	-0.76341	-89.5731	1	109	10	31	9	22	28
40116.5	2009-10-30 04:48:06	-0.79296	-89.5842	1	109	10	31	10	48	2
40116.5	2009-10-30 05:35:03	-0.80292	-89.5987	1	109	10	31	11	35	0
40116.5	2009-10-30 06:05:03	-0.82313	-89.6028	1	109	10	31	12	4	59
40116.7	2009-10-30 11:30:03	-0.90188	-89.6145	1	109	10	31	17	30	0
40116.7	2009-10-30 11:45:03	-0.90219	-89.6148	1	109	10	31	17	44	59
40116.8	2009-10-30 12:00:03	-0.90204	-89.6147	1	109	10	31	18	0	0
40116.8	2009-10-30 12:15:03	-0.90202	-89.6144	1	109	10	31	18	15	0
40116.8	2009-10-30 12:30:03	-0.90221	-89.6144	1	109	10	31	18	29	59
40116.8	2009-10-30 12:45:03	-0.902	-89.6145	1	109	10	31	18	45	0
40116.8	2009-10-30 13:00:03	-0.9024	-89.615	1	109	10	31	19	0	0
40116.8	2009-10-30 13:44:03	-0.90205	-89.6146	1	109	10	31	19	43	59
40116.8	2009-10-30 13:59:03	-0.90179	-89.6146	1	109	10	31	19	59	0
40116.8	2009-10-30 14:14:03	-0.90167	-89.6146	1	109	10	31	20	14	0
40116.9	2009-10-30 14:29:03	-0.90173	-89.6145	1	109	10	31	20	28	59
40116.9	2009-10-30 14:44:03	-0.90192	-89.6145	1	109	10	31	20	44	0
40116.9	2009-10-30 14:59:03	-0.90201	-89.6146	1	109	10	31	20	59	0
40116.9	2009-10-30 15:44:03	-0.90206	-89.6147	1	109	10	31	21	44	0
40116.9	2009-10-30 15:59:03	-0.90192	-89.6146	1	109	10	31	21	58	59
40116.9	2009-10-30 16:14:03	-0.9019	-89.6147	1	109	10	31	22	14	0
40116.9	2009-10-30 16:29:03	-0.90191	-89.6145	1	109	10	31	22	29	0
40116.9	2009-10-30 16:44:03	-0.90189	-89.6148	1	109	10	31	22	43	59
40117	2009-10-30 16:59:03	-0.90193	-89.6148	1	109	10	31	22	59	0
40117	2009-10-30 17:14:03	-0.9019	-89.6148	1	109	10	31	23	14	0
40117	2009-10-30 17:29:03	-0.90177	-89.6147	1	109	10	31	23	28	59
40117	2009-10-30 17:44:03	-0.90194	-89.6147	1	109	10	31	23	44	0
40117	2009-10-30 17:59:03	-0.90204	-89.6148	1	109	10	31	23	59	0
40117	2009-10-30 18:14:03	-0.9019	-89.6146	1	109	11	1	0	13	59
40117	2009-10-30 18:29:03	-0.90187	-89.6149	1	109	11	1	0	29	0
40117	2009-10-30 18:44:03	-0.90193	-89.6148	1	109	11	1	0	44	0
40117	2009-10-30 18:59:03	-0.90194	-89.6147	1	109	11	1	0	58	59
40117.1	2009-10-30 19:14:03	-0.90191	-89.6147	1	109	11	1	1	14	0
40117.1	2009-10-30 19:29:03	-0.9019	-89.6148	1	109	11	1	1	29	0
40117.1	2009-10-30 19:44:03	-0.90244	-89.6153	1	109	11	1	1	43	59
40117.1	2009-10-30 19:59:03	-0.90197	-89.6148	1	109	11	1	1	59	0
40117.1	2009-10-30 20:14:03	-0.9022	-89.6149	1	109	11	1	2	14	0
40117.1	2009-10-30 20:29:03	-0.90205	-89.6148	1	109	11	1	2	28	59
40117.1	2009-10-30 20:44:03	-0.90212	-89.6146	1	109	11	1	2	44	0
40117.1	2009-10-30 20:59:03	-0.9018	-89.615	1	109	11	1	2	59	0
40117.4	2009-10-31 04:44:03	-0.90238	-89.6149	1	109	11	1	10	43	59
40117.5	2009-10-31 04:59:03	-0.90209	-89.6146	1	109	11	1	10	59	0
40117.5	2009-10-31 05:14:03	-0.90157	-89.6144	1	109	11	1	11	14	0
40117.5	2009-10-31 05:29:03	-0.90211	-89.6151	1	109	11	1	11	28	59
40117.5	2009-10-31 05:44:03	-0.90194	-89.6145	1	109	11	1	11	44	0
40117.5	2009-10-31 05:59:03	-0.90207	-89.6146	1	109	11	1	11	59	0
40117.5	2009-10-31 06:14:03	-0.90203	-89.6147	1	109	11	1	12	13	59
40117.5	2009-10-31 06:29:03	-0.90205	-89.6144	1	109	11	1	12	29	0
40117.5	2009-10-31 06:44:03	-0.90164	-89.6153	1	109	11	1	12	44	0
40117.6	2009-10-31 07:44:03	-0.90202	-89.6147	1	109	11	1	13	43	59
40117.6	2009-10-31 07:59:03	-0.90189	-89.6146	1	109	11	1	13	59	0
40117.7	2009-10-31 09:46:27	-0.87729	-89.7031	1	109	11	1	15	46	23
40117.8	2009-10-31 13:50:50	-0.83431	-89.8363	1	109	11	1	19	50	46
40118	2009-10-31 18:24:03	-0.86204	-89.8143	1	109	11	2	0	24	0
40118.2	2009-10-31 21:37:12	-0.86262	-89.7355	1	109	11	2	3	37	9
40118.3	2009-11-01 00:23:03	-0.86154	-89.6798	1	109	11	2	6	22	59
40118.3	2009-11-01 00:56:16	-0.85989	-89.6763	1	109	11	2	6	56	13
40118.3	2009-11-01 01:46:29	-0.85875	-89.6713	1	109	11	2	7	46	25
40118.4	2009-11-01 03:45:24	-0.89782	-89.6324	1	109	11	2	9	45	20
40118.4	2009-11-01 04:15:03	-0.90231	-89.615	1	109	11	2	10	14	59
40118.4	2009-11-01 04:30:03	-0.90203	-89.6148	1	109	11	2	10	30	0
40118.4	2009-11-01 04:45:03	-0.90198	-89.6148	1	109	11	2	10	45	0
40118.5	2009-11-01 05:00:03	-0.90188	-89.6146	1	109	11	2	10	59	59
40118.5	2009-11-01 05:15:03	-0.90183	-89.6146	1	109	11	2	11	15	0
40118.5	2009-11-01 05:30:03	-0.90187	-89.6149	1	109	11	2	11	30	0
40118.5	2009-11-01 05:45:03	-0.9019	-89.6146	1	109	11	2	11	44	59
40118.5	2009-11-01 06:00:03	-0.90199	-89.6148	1	109	11	2	12	0	0
40118.5	2009-11-01 06:15:03	-0.90196	-89.6146	1	109	11	2	12	15	0
40118.5	2009-11-01 06:30:03	-0.90197	-89.6147	1	109	11	2	12	29	59
40118.5	2009-11-01 06:45:03	-0.90205	-89.6145	1	109	11	2	12	45	0
40118.5	2009-11-01 07:00:03	-0.90198	-89.6146	1	109	11	2	13	0	0
40118.6	2009-11-01 07:15:03	-0.90208	-89.6144	1	109	11	2	13	14	59
40118.6	2009-11-01 07:30:03	-0.90198	-89.6145	1	109	11	2	13	30	0
40118.6	2009-11-01 07:45:03	-0.9019	-89.6143	1	109	11	2	13	45	0
40118.6	2009-11-01 08:00:03	-0.90197	-89.6147	1	109	11	2	13	59	59
40118.6	2009-11-01 08:15:03	-0.90197	-89.6143	1	109	11	2	14	15	0
40118.6	2009-11-01 08:30:03	-0.902	-89.6144	1	109	11	2	14	30	0

## Sheet: SCF02_GPS_filtered
40114.8	2009-10-28 12:20:07	-0.90228	-89.6137	1	109	10	29	18	20	4
40114.8	2009-10-28 12:52:03	-0.89473	-89.6103	1	109	10	29	18	51	59
40114.8	2009-10-28 13:07:03	-0.89472	-89.6102	1	109	10	29	19	7	0
40114.8	2009-10-28 13:22:03	-0.89458	-89.6101	1	109	10	29	19	21	59
40114.8	2009-10-28 13:37:03	-0.89462	-89.6103	1	109	10	29	19	36	59
40114.8	2009-10-28 13:52:03	-0.89463	-89.6103	1	109	10	29	19	52	0
40114.8	2009-10-28 14:07:03	-0.89461	-89.6103	1	109	10	29	20	6	59
40114.8	2009-10-28 14:22:03	-0.89449	-89.6103	1	109	10	29	20	21	59
40114.9	2009-10-28 14:37:03	-0.89473	-89.6103	1	109	10	29	20	37	0
40114.9	2009-10-28 14:52:03	-0.89462	-89.6101	1	109	10	29	20	51	59
40114.9	2009-10-28 15:07:03	-0.89445	-89.6103	1	109	10	29	21	6	59
40114.9	2009-10-28 15:22:03	-0.89457	-89.6103	1	109	10	29	21	22	0
40114.9	2009-10-28 15:37:03	-0.89448	-89.6103	1	109	10	29	21	36	59
40114.9	2009-10-28 15:52:03	-0.89445	-89.6102	1	109	10	29	21	51	59
40114.9	2009-10-28 16:07:03	-0.89453	-89.6103	1	109	10	29	22	7	0
40114.9	2009-10-28 16:22:03	-0.89477	-89.6102	1	109	10	29	22	21	59
40114.9	2009-10-28 16:37:03	-0.89463	-89.6103	1	109	10	29	22	36	59
40115	2009-10-28 16:52:03	-0.89655	-89.6127	1	109	10	29	22	52	0
40115	2009-10-28 17:07:03	-0.89458	-89.6102	1	109	10	29	23	6	59
40115	2009-10-28 17:22:03	-0.89463	-89.6104	1	109	10	29	23	21	59
40115	2009-10-28 17:37:03	-0.89469	-89.6104	1	109	10	29	23	37	0
40115	2009-10-28 17:52:03	-0.89471	-89.6101	1	109	10	29	23	51	59
40115	2009-10-28 18:07:03	-0.89484	-89.6105	1	109	10	30	0	6	59
40115	2009-10-28 18:37:03	-0.89678	-89.6106	1	109	10	30	0	36	59
40115	2009-10-28 18:52:03	-0.89465	-89.6103	1	109	10	30	0	51	59
40115	2009-10-28 19:07:03	-0.89467	-89.6102	1	109	10	30	1	7	0
40115.1	2009-10-28 19:22:03	-0.89457	-89.6101	1	109	10	30	1	21	59
40115.1	2009-10-28 19:37:03	-0.89455	-89.6102	1	109	10	30	1	36	59
40115.1	2009-10-28 19:52:03	-0.89466	-89.6102	1	109	10	30	1	52	0
40115.1	2009-10-28 20:07:03	-0.89468	-89.6103	1	109	10	30	2	6	59
40115.1	2009-10-28 20:22:03	-0.8946	-89.6103	1	109	10	30	2	21	59
40115.1	2009-10-28 20:37:03	-0.89466	-89.6103	1	109	10	30	2	37	0
40115.1	2009-10-28 20:52:03	-0.89467	-89.6103	1	109	10	30	2	51	59
40115.1	2009-10-28 21:07:03	-0.89457	-89.6102	1	109	10	30	3	6	59
40115.1	2009-10-28 21:22:03	-0.89473	-89.6099	1	109	10	30	3	22	0
40115.2	2009-10-28 21:37:03	-0.89475	-89.6105	1	109	10	30	3	36	59
40115.2	2009-10-28 21:52:03	-0.89462	-89.6101	1	109	10	30	3	51	59
40115.2	2009-10-28 22:07:03	-0.89472	-89.61	1	109	10	30	4	7	0
40115.2	2009-10-28 22:22:03	-0.89475	-89.6101	1	109	10	30	4	21	59
40115.2	2009-10-28 22:37:03	-0.89461	-89.6103	1	109	10	30	4	36	59
40115.2	2009-10-28 22:52:03	-0.8946	-89.6103	1	109	10	30	4	52	0
40115.2	2009-10-28 23:07:03	-0.89454	-89.6103	1	109	10	30	5	6	59
40115.2	2009-10-28 23:22:03	-0.89462	-89.6102	1	109	10	30	5	21	59
40115.2	2009-10-28 23:37:03	-0.89479	-89.61	1	109	10	30	5	37	0
40115.2	2009-10-28 23:52:03	-0.89465	-89.6102	1	109	10	30	5	51	59
40115.3	2009-10-29 00:07:03	-0.89465	-89.6101	1	109	10	30	6	6	59
40115.3	2009-10-29 00:22:03	-0.89458	-89.6102	1	109	10	30	6	22	0
40115.3	2009-10-29 00:37:03	-0.89438	-89.6106	1	109	10	30	6	36	59
40115.3	2009-10-29 00:52:03	-0.8946	-89.6101	1	109	10	30	6	51	59
40115.3	2009-10-29 01:07:03	-0.89463	-89.6102	1	109	10	30	7	7	0
40115.3	2009-10-29 01:22:03	-0.89464	-89.6102	1	109	10	30	7	21	59
40115.3	2009-10-29 01:37:03	-0.89467	-89.61	1	109	10	30	7	36	59
40115.3	2009-10-29 01:52:03	-0.89465	-89.6102	1	109	10	30	7	52	0
40115.3	2009-10-29 02:07:03	-0.89468	-89.6103	1	109	10	30	8	6	59
40115.3	2009-10-29 02:22:03	-0.8955	-89.6069	1	109	10	30	8	21	59
40115.4	2009-10-29 02:37:03	-0.89473	-89.6104	1	109	10	30	8	37	0
40115.4	2009-10-29 02:52:03	-0.89455	-89.6103	1	109	10	30	8	51	59
40115.4	2009-10-29 03:07:03	-0.89478	-89.6102	1	109	10	30	9	6	59
40115.4	2009-10-29 03:22:03	-0.89451	-89.6101	1	109	10	30	9	22	0
40115.4	2009-10-29 03:52:03	-0.8947	-89.6104	1	109	10	30	9	51	59
40115.4	2009-10-29 04:21:03	-0.89473	-89.6104	1	109	10	30	10	21	0
40115.4	2009-10-29 04:36:03	-0.89464	-89.6102	1	109	10	30	10	36	0
40115.5	2009-10-29 04:51:03	-0.89458	-89.6102	1	109	10	30	10	50	59
40115.5	2009-10-29 05:23:28	-0.87901	-89.6182	1	109	10	30	11	23	24
40115.8	2009-10-29 13:22:07	-0.84702	-89.8238	1	109	10	30	19	22	3
40116	2009-10-29 18:18:07	-0.87279	-89.7905	1	109	10	31	0	18	4
40116	2009-10-29 18:33:03	-0.87581	-89.788	1	109	10	31	0	33	0
40116.1	2009-10-29 20:05:09	-0.88322	-89.7653	1	109	10	31	2	5	6
40116.3	2009-10-30 00:15:07	-0.9015	-89.7502	1	109	10	31	6	15	3
40116.3	2009-10-30 01:33:30	-0.90461	-89.7633	1	109	10	31	7	33	27
40116.3	2009-10-30 02:03:04	-0.9043	-89.7709	1	109	10	31	8	3	1
40116.7	2009-10-30 11:46:06	-0.93636	-89.8286	1	109	10	31	17	46	2
40116.8	2009-10-30 12:04:24	-0.93523	-89.8372	1	109	10	31	18	4	20
40116.9	2009-10-30 15:28:03	-0.96717	-89.8324	1	109	10	31	21	27	59
40117	2009-10-30 18:11:05	-0.89687	-89.7487	1	109	11	1	0	11	1
40117.1	2009-10-30 19:27:54	-0.89079	-89.7173	1	109	11	1	1	27	51
40117.1	2009-10-30 20:25:36	-0.87825	-89.6938	1	109	11	1	2	25	33
40117.2	2009-10-30 22:38:03	-0.90186	-89.6146	1	109	11	1	4	38	0
40117.2	2009-10-30 22:53:03	-0.90194	-89.6147	1	109	11	1	4	52	59
40117.2	2009-10-30 23:08:03	-0.90196	-89.6147	1	109	11	1	5	8	0
40117.2	2009-10-30 23:23:03	-0.90193	-89.6147	1	109	11	1	5	23	0
40117.2	2009-10-30 23:38:03	-0.90214	-89.6148	1	109	11	1	5	37	59
40117.2	2009-10-30 23:53:03	-0.90198	-89.6148	1	109	11	1	5	53	0
40117.3	2009-10-31 00:08:03	-0.90191	-89.6147	1	109	11	1	6	8	0
40117.3	2009-10-31 00:23:03	-0.90216	-89.6149	1	109	11	1	6	22	59
40117.3	2009-10-31 00:38:03	-0.90256	-89.6149	1	109	11	1	6	38	0
40117.3	2009-10-31 00:53:03	-0.90188	-89.6148	1	109	11	1	6	53	0
40117.3	2009-10-31 01:08:03	-0.90208	-89.6147	1	109	11	1	7	7	59
40117.3	2009-10-31 01:23:03	-0.90199	-89.6147	1	109	11	1	7	23	0
40117.3	2009-10-31 01:38:03	-0.90218	-89.6147	1	109	11	1	7	38	0
40117.3	2009-10-31 01:53:03	-0.90222	-89.6149	1	109	11	1	7	52	59
40117.3	2009-10-31 02:23:03	-0.90182	-89.6143	1	109	11	1	8	23	0
40117.4	2009-10-31 02:38:03	-0.90204	-89.6149	1	109	11	1	8	37	59
40117.4	2009-10-31 02:53:03	-0.90201	-89.6148	1	109	11	1	8	53	0
40117.4	2009-10-31 03:08:03	-0.90218	-89.6149	1	109	11	1	9	8	0
40117.4	2009-10-31 03:23:03	-0.90217	-89.6149	1	109	11	1	9	22	59
40117.4	2009-10-31 03:38:03	-0.90205	-89.6148	1	109	11	1	9	38	0
40117.4	2009-10-31 03:53:03	-0.90207	-89.6149	1	109	11	1	9	53	0
40117.4	2009-10-31 04:08:03	-0.90208	-89.6149	1	109	11	1	10	7	59
40117.4	2009-10-31 04:23:03	-0.90202	-89.6146	1	109	11	1	10	23	0
40117.4	2009-10-31 04:38:03	-0.90195	-89.6149	1	109	11	1	10	38	0
40117.5	2009-10-31 04:53:03	-0.9022	-89.6148	1	109	11	1	10	52	59
40117.5	2009-10-31 05:08:03	-0.90196	-89.6146	1	109	11	1	11	8	0
40117.5	2009-10-31 05:38:03	-0.90223	-89.6149	1	109	11	1	11	37	59
40117.5	2009-10-31 05:53:03	-0.90209	-89.6148	1	109	11	1	11	53	0
40117.5	2009-10-31 06:08:03	-0.90198	-89.6149	1	109	11	1	12	8	0
40117.5	2009-10-31 06:23:03	-0.90172	-89.6143	1	109	11	1	12	22	59
40117.6	2009-10-31 07:23:03	-0.90207	-89.6146	1	109	11	1	13	23	0
40117.6	2009-10-31 07:38:03	-0.90214	-89.6148	1	109	11	1	13	38	0
40117.6	2009-10-31 07:53:03	-0.90219	-89.6147	1	109	11	1	13	52	59
40117.6	2009-10-31 08:08:03	-0.90191	-89.6147	1	109	11	1	14	8	0
40117.6	2009-10-31 08:23:03	-0.90192	-89.6149	1	109	11	1	14	23	0
40117.6	2009-10-31 08:38:03	-0.90205	-89.6146	1	109	11	1	14	37	59
40117.6	2009-10-31 08:53:03	-0.90211	-89.6145	1	109	11	1	14	53	0
40117.6	2009-10-31 09:08:03	-0.9019	-89.6145	1	109	11	1	15	8	0
40117.6	2009-10-31 09:23:03	-0.90209	-89.6146	1	109	11	1	15	22	59
40117.7	2009-10-31 09:38:03	-0.90182	-89.6148	1	109	11	1	15	38	0
40117.7	2009-10-31 09:53:03	-0.90185	-89.6149	1	109	11	1	15	53	0
40117.7	2009-10-31 10:08:03	-0.90197	-89.6145	1	109	11	1	16	7	59
40117.7	2009-10-31 10:23:03	-0.90209	-89.6151	1	109	11	1	16	23	0
40117.7	2009-10-31 10:53:03	-0.9019	-89.6148	1	109	11	1	16	52	59
40117.7	2009-10-31 11:08:03	-0.90184	-89.6146	1	109	11	1	17	8	0
40117.7	2009-10-31 11:23:03	-0.90137	-89.6141	1	109	11	1	17	23	0
40117.7	2009-10-31 11:38:03	-0.90222	-89.6149	1	109	11	1	17	37	59
40117.7	2009-10-31 11:53:03	-0.90207	-89.6145	1	109	11	1	17	53	0
40117.8	2009-10-31 12:08:03	-0.90218	-89.615	1	109	11	1	18	8	0
40117.8	2009-10-31 12:23:03	-0.90207	-89.6146	1	109	11	1	18	22	59
40117.8	2009-10-31 12:38:03	-0.902	-89.6146	1	109	11	1	18	38	0
40117.8	2009-10-31 12:53:03	-0.9019	-89.6148	1	109	11	1	18	53	0
40117.8	2009-10-31 13:08:03	-0.90204	-89.6148	1	109	11	1	19	7	59
40117.8	2009-10-31 13:38:03	-0.90158	-89.6147	1	109	11	1	19	38	0
40117.8	2009-10-31 13:53:03	-0.9015	-89.6147	1	109	11	1	19	52	59
40117.8	2009-10-31 14:08:03	-0.90194	-89.6147	1	109	11	1	20	8	0
40117.9	2009-10-31 14:38:03	-0.90198	-89.6149	1	109	11	1	20	37	59
40117.9	2009-10-31 14:53:03	-0.90203	-89.6148	1	109	11	1	20	53	0
40117.9	2009-10-31 15:08:03	-0.90187	-89.6149	1	109	11	1	21	8	0
40117.9	2009-10-31 15:23:03	-0.90202	-89.6149	1	109	11	1	21	22	59
40117.9	2009-10-31 15:38:03	-0.90225	-89.6171	1	109	11	1	21	38	0
40117.9	2009-10-31 15:53:03	-0.90166	-89.6148	1	109	11	1	21	53	0
40117.9	2009-10-31 16:08:03	-0.90192	-89.6145	1	109	11	1	22	7	59
40117.9	2009-10-31 16:23:03	-0.90175	-89.6143	1	109	11	1	22	23	0
40117.9	2009-10-31 16:38:03	-0.9014	-89.6143	1	109	11	1	22	38	0
40118	2009-10-31 16:53:03	-0.90153	-89.6145	1	109	11	1	22	52	59
40118	2009-10-31 17:08:03	-0.90204	-89.6146	1	109	11	1	23	8	0
40118	2009-10-31 17:23:03	-0.90221	-89.6145	1	109	11	1	23	23	0
40118	2009-10-31 17:38:03	-0.90211	-89.6148	1	109	11	1	23	37	59
40118	2009-10-31 17:53:03	-0.90195	-89.6149	1	109	11	1	23	53	0
40118	2009-10-31 18:08:03	-0.90197	-89.6148	1	109	11	2	0	8	0
40118	2009-10-31 18:38:03	-0.90197	-89.6149	1	109	11	2	0	38	0
40118.1	2009-10-31 19:53:03	-0.90202	-89.615	1	109	11	2	1	52	59
40118.1	2009-10-31 20:08:03	-0.90194	-89.6147	1	109	11	2	2	8	0
40118.1	2009-10-31 20:23:03	-0.90211	-89.6148	1	109	11	2	2	23	0
40118.1	2009-10-31 20:38:03	-0.9021	-89.6148	1	109	11	2	2	37	59
40118.1	2009-10-31 21:08:03	-0.9017	-89.6149	1	109	11	2	3	8	0
40118.1	2009-10-31 21:23:03	-0.90224	-89.6146	1	109	11	2	3	22	59
40118.2	2009-10-31 22:08:03	-0.90262	-89.6136	1	109	11	2	4	7	59
40118.2	2009-10-31 23:38:03	-0.90206	-89.6149	1	109	11	2	5	37	59
40118.2	2009-10-31 23:53:03	-0.90225	-89.6147	1	109	11	2	5	53	0
40118.3	2009-11-01 00:08:03	-0.90187	-89.6146	1	109	11	2	6	8	0
40118.3	2009-11-01 00:23:03	-0.90248	-89.6151	1	109	11	2	6	22	59
40118.3	2009-11-01 00:53:03	-0.90219	-89.6146	1	109	11	2	6	53	0
40118.3	2009-11-01 01:08:03	-0.90209	-89.6148	1	109	11	2	7	7	59
40118.3	2009-11-01 01:23:03	-0.90195	-89.6149	1	109	11	2	7	23	0
40118.3	2009-11-01 01:38:03	-0.90199	-89.6146	1	109	11	2	7	38	0
40118.3	2009-11-01 02:23:03	-0.90118	-89.6151	1	109	11	2	8	23	0
40118.4	2009-11-01 03:53:22	-0.89736	-89.6871	1	109	11	2	9	53	19
40118.5	2009-11-01 06:55:18	-0.90783	-89.8483	1	109	11	2	12	55	15
40118.6	2009-11-01 07:49:03	-0.91199	-89.8428	1	109	11	2	13	48	59
40118.6	2009-11-01 08:57:06	-0.90714	-89.8421	1	109	11	2	14	57	2
40118.7	2009-11-01 11:37:05	-0.93595	-89.8564	1	109	11	2	17	37	1
40118.7	2009-11-01 11:52:04	-0.93797	-89.8574	1	109	11	2	17	52	1
40118.8	2009-11-01 14:11:05	-0.95655	-89.8459	1	109	11	2	20	11	2
40118.9	2009-11-01 14:59:03	-0.969	-89.8467	1	109	11	2	20	59	0
40119.2	2009-11-01 23:44:41	-0.93727	-89.9214	1	109	11	3	5	44	38
40119.3	2009-11-02 00:50:05	-0.93317	-89.9257	1	109	11	3	6	50	2
40119.7	2009-11-02 09:49:20	-0.93872	-89.9447	1	109	11	3	15	49	16
40119.7	2009-11-02 11:18:08	-0.93769	-89.9604	1	109	11	3	17	18	4
40119.8	2009-11-02 12:01:03	-0.92889	-89.9775	1	109	11	3	18	0	59
40119.9	2009-11-02 15:37:03	-0.83869	-90.0382	1	109	11	3	21	36	59
40119.9	2009-11-02 15:52:03	-0.83927	-90.0388	1	109	11	3	21	51	59
40120	2009-11-02 17:50:03	-0.83711	-90.0309	1	109	11	3	23	50	0
40120	2009-11-02 18:05:03	-0.83717	-90.0305	1	109	11	4	0	4	59
40120	2009-11-02 18:20:03	-0.83722	-90.0306	1	109	11	4	0	20	0
40120	2009-11-02 18:35:03	-0.83728	-90.0306	1	109	11	4	0	35	0
40120	2009-11-02 18:50:03	-0.83708	-90.0307	1	109	11	4	0	49	59
40120	2009-11-02 19:05:03	-0.83746	-90.0305	1	109	11	4	1	5	0
40120.1	2009-11-02 19:35:03	-0.83712	-90.0307	1	109	11	4	1	34	59
40120.1	2009-11-02 19:50:03	-0.8372	-90.0306	1	109	11	4	1	50	0
40120.1	2009-11-02 20:05:03	-0.83803	-90.0307	1	109	11	4	2	5	0
40120.1	2009-11-02 20:20:03	-0.83542	-90.0304	1	109	11	4	2	19	59
40120.1	2009-11-02 20:35:03	-0.83861	-90.0304	1	109	11	4	2	35	0
40120.1	2009-11-02 20:50:03	-0.83722	-90.0307	1	109	11	4	2	50	0
40120.1	2009-11-02 21:05:03	-0.83738	-90.0305	1	109	11	4	3	4	59
40120.1	2009-11-02 21:20:03	-0.83715	-90.0304	1	109	11	4	3	20	0
40120.2	2009-11-02 22:05:03	-0.83718	-90.0305	1	109	11	4	4	5	0
40120.2	2009-11-02 22:20:03	-0.83731	-90.0304	1	109	11	4	4	20	0
40120.2	2009-11-02 22:35:03	-0.83706	-90.0304	1	109	11	4	4	34	59
40120.2	2009-11-02 23:20:03	-0.83734	-90.0307	1	109	11	4	5	19	59
40120.2	2009-11-02 23:35:03	-0.83712	-90.0306	1	109	11	4	5	35	0
40120.2	2009-11-02 23:50:03	-0.8375	-90.0308	1	109	11	4	5	50	0
40120.3	2009-11-03 00:05:03	-0.83728	-90.0307	1	109	11	4	6	4	59
40120.3	2009-11-03 00:20:03	-0.83692	-90.0303	1	109	11	4	6	20	0
40120.3	2009-11-03 00:35:03	-0.83721	-90.0305	1	109	11	4	6	35	0
40120.3	2009-11-03 01:35:03	-0.83731	-90.0305	1	109	11	4	7	34	59
40120.4	2009-11-03 03:33:07	-0.90811	-90.0393	1	109	11	4	9	33	3
40120.8	2009-11-03 14:21:26	-0.91956	-90.0398	1	109	11	4	20	21	22
40120.9	2009-11-03 15:51:04	-0.91151	-90.0698	1	109	11	4	21	51	1
40121	2009-11-03 18:18:05	-0.90467	-90.0752	1	109	11	5	0	18	1
40121	2009-11-03 19:02:58	-0.91213	-90.0866	1	109	11	5	1	2	54
40121.1	2009-11-03 19:18:03	-0.9163	-90.0874	1	109	11	5	1	18	0
40121.2	2009-11-03 23:06:04	-0.92666	-90.1345	1	109	11	5	5	6	0
40122.1	2009-11-04 20:25:03	-0.83919	-90.0378	1	109	11	6	2	24	59
40122.1	2009-11-04 20:40:03	-0.83887	-90.0379	1	109	11	6	2	39	59
40122.1	2009-11-04 20:55:03	-0.83871	-90.0379	1	109	11	6	2	55	0
40122.1	2009-11-04 21:10:03	-0.83882	-90.0378	1	109	11	6	3	9	59
40122.2	2009-11-04 21:55:03	-0.83878	-90.038	1	109	11	6	3	54	59
40122.2	2009-11-04 22:10:03	-0.83898	-90.0378	1	109	11	6	4	9	59
40122.2	2009-11-04 22:25:03	-0.83885	-90.0379	1	109	11	6	4	25	0
40122.2	2009-11-04 22:40:03	-0.83882	-90.0379	1	109	11	6	4	39	59
40122.2	2009-11-04 22:55:03	-0.83883	-90.0379	1	109	11	6	4	54	59
40122.2	2009-11-04 23:10:03	-0.83874	-90.0378	1	109	11	6	5	10	0
40122.2	2009-11-04 23:25:03	-0.83893	-90.038	1	109	11	6	5	24	59
40122.3	2009-11-05 00:10:03	-0.83891	-90.0381	1	109	11	6	6	9	59
40122.3	2009-11-05 00:25:03	-0.83863	-90.0379	1	109	11	6	6	24	59
40122.3	2009-11-05 00:40:03	-0.83877	-90.0377	1	109	11	6	6	40	0
40122.3	2009-11-05 00:55:03	-0.83954	-90.0384	1	109	11	6	6	54	59
40122.3	2009-11-05 01:40:03	-0.83869	-90.0377	1	109	11	6	7	39	59
40122.3	2009-11-05 01:55:03	-0.83946	-90.038	1	109	11	6	7	54	59
40122.3	2009-11-05 02:10:03	-0.83911	-90.038	1	109	11	6	8	10	0
40122.4	2009-11-05 02:55:03	-0.8385	-90.0384	1	109	11	6	8	55	0
40122.5	2009-11-05 04:53:00	-0.91627	-90.0296	1	109	11	6	10	52	57
40122.9	2009-11-05 16:05:03	-1.05677	-89.8744	1	109	11	6	22	5	0
40123.1	2009-11-05 20:21:21	-1.06029	-89.8086	1	109	11	7	2	21	17
40123.3	2009-11-06 00:34:07	-1.14421	-89.7746	1	109	11	7	6	34	4
40123.5	2009-11-06 06:15:43	-1.10688	-89.8294	1	109	11	7	12	15	40
40123.7	2009-11-06 11:39:04	-1.09556	-89.831	1	109	11	7	17	39	1
40124.2	2009-11-06 21:57:04	-0.97411	-89.7335	1	109	11	8	3	57	0
40124.3	2009-11-07 02:15:03	-0.90129	-89.6146	1	109	11	8	8	15	0
40124.4	2009-11-07 02:30:03	-0.90161	-89.6153	1	109	11	8	8	30	0
40124.4	2009-11-07 02:45:03	-0.90142	-89.6151	1	109	11	8	8	44	59
40124.4	2009-11-07 03:00:03	-0.90117	-89.6147	1	109	11	8	9	0	0
40124.4	2009-11-07 03:15:03	-0.90164	-89.6152	1	109	11	8	9	15	0
40124.4	2009-11-07 04:00:03	-0.90166	-89.6155	1	109	11	8	10	0	0
40124.4	2009-11-07 04:15:03	-0.90147	-89.6154	1	109	11	8	10	14	59
40124.5	2009-11-07 05:15:03	-0.9014	-89.6153	1	109	11	8	11	15	0
40124.5	2009-11-07 06:00:03	-0.90169	-89.6155	1	109	11	8	12	0	0
40124.5	2009-11-07 06:15:03	-0.90134	-89.6152	1	109	11	8	12	15	0
40124.5	2009-11-07 07:00:03	-0.90161	-89.6113	1	109	11	8	13	0	0

## Sheet: SCF03_GPS_filtered
40115.7	2009-10-29 11:50:03	-0.89527	-89.6096	1	109	10	30	17	50	0
40115.8	2009-10-29 12:05:03	-0.89541	-89.6094	1	109	10	30	18	4	59
40115.8	2009-10-29 12:20:03	-0.89526	-89.6094	1	109	10	30	18	20	0
40115.8	2009-10-29 12:35:03	-0.89539	-89.6092	1	109	10	30	18	35	0
40115.8	2009-10-29 12:50:03	-0.89523	-89.6098	1	109	10	30	18	49	59
40115.8	2009-10-29 13:05:03	-0.89513	-89.6096	1	109	10	30	19	5	0
40115.8	2009-10-29 13:20:03	-0.89503	-89.6097	1	109	10	30	19	20	0
40115.8	2009-10-29 13:35:03	-0.89516	-89.6096	1	109	10	30	19	34	59
40115.8	2009-10-29 14:18:03	-0.89503	-89.6094	1	109	10	30	20	17	59
40115.9	2009-10-29 14:33:03	-0.89564	-89.6098	1	109	10	30	20	32	60
40115.9	2009-10-29 14:48:03	-0.89531	-89.6097	1	109	10	30	20	48	0
40115.9	2009-10-29 15:03:03	-0.8956	-89.6102	1	109	10	30	21	2	59
40115.9	2009-10-29 15:18:03	-0.89524	-89.6096	1	109	10	30	21	17	60
40115.9	2009-10-29 15:33:03	-0.89528	-89.6095	1	109	10	30	21	33	0
40115.9	2009-10-29 15:48:03	-0.89516	-89.6096	1	109	10	30	21	47	59
40115.9	2009-10-29 16:03:03	-0.89525	-89.6094	1	109	10	30	22	2	60
40115.9	2009-10-29 16:18:03	-0.89527	-89.6094	1	109	10	30	22	18	0
40115.9	2009-10-29 16:33:03	-0.89522	-89.6098	1	109	10	30	22	32	59
40115.9	2009-10-29 16:48:03	-0.89544	-89.6092	1	109	10	30	22	47	60
40116	2009-10-29 17:03:03	-0.89525	-89.6096	1	109	10	30	23	3	0
40116	2009-10-29 17:18:03	-0.89532	-89.6132	1	109	10	30	23	17	59
40116	2009-10-29 17:33:03	-0.89547	-89.6099	1	109	10	30	23	32	60
40116	2009-10-29 17:48:03	-0.89557	-89.6094	1	109	10	30	23	48	0
40116	2009-10-29 18:03:03	-0.89531	-89.6095	1	109	10	31	0	2	59
40116	2009-10-29 18:18:03	-0.89528	-89.6096	1	109	10	31	0	17	60
40116	2009-10-29 18:33:03	-0.89534	-89.6098	1	109	10	31	0	33	0
40116	2009-10-29 18:48:03	-0.89555	-89.6098	1	109	10	31	0	47	59
40116	2009-10-29 19:03:03	-0.89541	-89.6099	1	109	10	31	1	2	60
40116.1	2009-10-29 19:18:03	-0.89519	-89.6096	1	109	10	31	1	18	0
40116.1	2009-10-29 19:33:03	-0.89522	-89.6099	1	109	10	31	1	32	59
40116.1	2009-10-29 19:48:03	-0.89519	-89.6094	1	109	10	31	1	47	60
40116.1	2009-10-29 20:03:03	-0.89527	-89.6095	1	109	10	31	2	3	0
40116.1	2009-10-29 20:18:03	-0.89522	-89.6096	1	109	10	31	2	17	59
40116.1	2009-10-29 20:33:03	-0.89507	-89.6098	1	109	10	31	2	32	60
40116.1	2009-10-29 20:48:03	-0.89513	-89.6098	1	109	10	31	2	48	0
40116.1	2009-10-29 21:03:03	-0.89532	-89.6098	1	109	10	31	3	2	59
40116.1	2009-10-29 21:18:03	-0.89516	-89.6096	1	109	10	31	3	17	60
40116.1	2009-10-29 21:33:03	-0.8951	-89.6097	1	109	10	31	3	33	0
40116.2	2009-10-29 21:48:03	-0.89497	-89.6097	1	109	10	31	3	47	59
40116.2	2009-10-29 22:03:03	-0.89526	-89.6096	1	109	10	31	4	2	60
40116.2	2009-10-29 22:33:03	-0.89537	-89.6096	1	109	10	31	4	32	59
40116.2	2009-10-29 23:03:03	-0.89489	-89.6093	1	109	10	31	5	3	0
40116.2	2009-10-29 23:18:03	-0.89533	-89.6096	1	109	10	31	5	17	59
40116.2	2009-10-29 23:33:03	-0.8953	-89.6095	1	109	10	31	5	32	60
40116.2	2009-10-29 23:48:03	-0.89523	-89.6096	1	109	10	31	5	48	0
40116.3	2009-10-30 01:03:03	-0.89546	-89.6094	1	109	10	31	7	2	60
40116.3	2009-10-30 01:18:03	-0.89494	-89.6098	1	109	10	31	7	18	0
40116.3	2009-10-30 01:33:03	-0.89555	-89.6096	1	109	10	31	7	32	59
40116.3	2009-10-30 01:48:03	-0.89513	-89.6096	1	109	10	31	7	47	60
40116.3	2009-10-30 02:03:03	-0.89362	-89.6108	1	109	10	31	8	3	0
40116.4	2009-10-30 02:33:03	-0.89553	-89.6099	1	109	10	31	8	32	60
40116.4	2009-10-30 02:48:03	-0.8958	-89.6089	1	109	10	31	8	48	0
40116.4	2009-10-30 03:03:03	-0.89536	-89.6121	1	109	10	31	9	2	59
40116.4	2009-10-30 03:48:03	-0.895	-89.6097	1	109	10	31	9	47	59
40116.5	2009-10-30 04:48:32	-0.89534	-89.6103	1	109	10	31	10	48	29
40116.5	2009-10-30 05:18:11	-0.86784	-89.6166	1	109	10	31	11	18	8
40116.5	2009-10-30 06:31:15	-0.78603	-89.624	1	109	10	31	12	31	12
40116.8	2009-10-30 13:09:03	-0.56731	-89.5767	1	109	10	31	19	9	0
40116.9	2009-10-30 14:33:03	-0.56806	-89.5775	1	109	10	31	20	32	60
40116.9	2009-10-30 14:48:03	-0.56356	-89.5737	1	109	10	31	20	48	0
40116.9	2009-10-30 15:31:03	-0.56634	-89.5742	1	109	10	31	21	31	0
40116.9	2009-10-30 16:15:07	-0.55269	-89.5782	1	109	10	31	22	15	4
40117.1	2009-10-30 21:14:08	-0.46647	-89.6152	1	109	11	1	3	14	4
40117.5	2009-10-31 06:13:03	-0.55645	-89.5791	1	109	11	1	12	13	0
40117.6	2009-10-31 07:30:03	-0.55376	-89.5763	1	109	11	1	13	30	0
40117.7	2009-10-31 10:23:03	-0.43493	-89.6291	1	109	11	1	16	23	0
40117.7	2009-10-31 10:52:03	-0.44472	-89.624	1	109	11	1	16	52	0
40117.8	2009-10-31 12:12:12	-0.44496	-89.6298	1	109	11	1	18	12	9
40117.8	2009-10-31 13:23:09	-0.45706	-89.6192	1	109	11	1	19	23	6
40117.9	2009-10-31 15:44:03	-0.42923	-89.6305	1	109	11	1	21	44	0
40117.9	2009-10-31 16:20:05	-0.43026	-89.6296	1	109	11	1	22	20	2
40118	2009-10-31 16:49:20	-0.43519	-89.6299	1	109	11	1	22	49	16
40118	2009-10-31 17:44:03	-0.43661	-89.6318	1	109	11	1	23	44	0
40118	2009-10-31 17:59:18	-0.43687	-89.6333	1	109	11	1	23	59	15
40118	2009-10-31 18:14:13	-0.43782	-89.6331	1	109	11	2	0	14	10
40118.1	2009-10-31 20:21:03	-0.43558	-89.6411	1	109	11	2	2	21	0
40118.1	2009-10-31 20:36:03	-0.43343	-89.6411	1	109	11	2	2	35	59
40118.1	2009-10-31 20:51:18	-0.43122	-89.6404	1	109	11	2	2	51	14
40118.1	2009-10-31 21:06:04	-0.4274	-89.6402	1	109	11	2	3	6	1
40118.1	2009-10-31 21:21:12	-0.42396	-89.6392	1	109	11	2	3	21	9
40118.2	2009-10-31 21:36:03	-0.41986	-89.6392	1	109	11	2	3	36	0
40118.2	2009-10-31 21:51:03	-0.41549	-89.6386	1	109	11	2	3	51	0
40118.2	2009-10-31 22:20:04	-0.40824	-89.6372	1	109	11	2	4	20	1
40118.2	2009-10-31 22:49:07	-0.40299	-89.6366	1	109	11	2	4	49	3
40118.2	2009-10-31 23:32:05	-0.39321	-89.6354	1	109	11	2	5	32	2
40118.2	2009-10-31 23:47:09	-0.40367	-89.636	1	109	11	2	5	47	5
40118.4	2009-11-01 02:45:35	-0.45949	-89.5853	1	109	11	2	8	45	31
40118.4	2009-11-01 03:16:39	-0.47033	-89.5866	1	109	11	2	9	16	36
40118.4	2009-11-01 03:32:03	-0.47104	-89.5819	1	109	11	2	9	31	59
40118.4	2009-11-01 04:07:03	-0.4727	-89.5797	1	109	11	2	10	7	0
40118.5	2009-11-01 05:34:04	-0.45981	-89.5916	1	109	11	2	11	34	1
40118.5	2009-11-01 06:06:04	-0.45831	-89.5903	1	109	11	2	12	6	1
40118.6	2009-11-01 07:13:03	-0.45941	-89.5926	1	109	11	2	13	12	59
40118.6	2009-11-01 07:35:02	-0.45746	-89.5882	1	109	11	2	13	34	58
40118.7	2009-11-01 10:13:06	-0.44829	-89.6264	1	109	11	2	16	13	3
40118.8	2009-11-01 12:04:00	-0.45158	-89.6032	1	109	11	2	18	3	56
40118.8	2009-11-01 14:02:03	-0.43577	-89.6366	1	109	11	2	20	1	59
40118.9	2009-11-01 15:45:14	-0.43439	-89.633	1	109	11	2	21	45	11
40119	2009-11-01 18:48:18	-0.49159	-89.5938	1	109	11	3	0	48	15
40119.1	2009-11-01 20:32:05	-0.53429	-89.5733	1	109	11	3	2	32	2
40119.1	2009-11-01 21:31:04	-0.53516	-89.5792	1	109	11	3	3	31	1
40119.2	2009-11-01 22:42:03	-0.53479	-89.5781	1	109	11	3	4	41	59
40119.2	2009-11-01 22:57:20	-0.53359	-89.5747	1	109	11	3	4	57	17
40119.7	2009-11-02 10:07:03	-0.44925	-89.6267	1	109	11	3	16	7	0
40119.7	2009-11-02 10:22:04	-0.4506	-89.6284	1	109	11	3	16	22	1
40119.7	2009-11-02 11:05:03	-0.45528	-89.6251	1	109	11	3	17	5	0
40119.8	2009-11-02 12:53:03	-0.43137	-89.6297	1	109	11	3	18	53	0
40119.8	2009-11-02 13:22:03	-0.42988	-89.6312	1	109	11	3	19	21	59
40119.9	2009-11-02 14:37:03	-0.43518	-89.6288	1	109	11	3	20	37	0
40119.9	2009-11-02 15:34:46	-0.46716	-89.6145	1	109	11	3	21	34	43
40119.9	2009-11-02 15:50:03	-0.48293	-89.6091	1	109	11	3	21	49	59
40120	2009-11-02 17:58:04	-0.61997	-89.5986	1	109	11	3	23	58	0
40120	2009-11-02 18:55:29	-0.68502	-89.5908	1	109	11	4	0	55	26
40120.1	2009-11-02 20:49:14	-0.81069	-89.6071	1	109	11	4	2	49	11
40120.2	2009-11-02 22:14:03	-0.89534	-89.6097	1	109	11	4	4	14	0
40120.2	2009-11-02 22:29:03	-0.89529	-89.6097	1	109	11	4	4	29	0
40120.2	2009-11-02 22:44:03	-0.89439	-89.6098	1	109	11	4	4	43	59
40120.2	2009-11-02 22:59:03	-0.89532	-89.6098	1	109	11	4	4	59	0
40120.2	2009-11-02 23:29:03	-0.89507	-89.6097	1	109	11	4	5	28	59
40120.2	2009-11-02 23:44:03	-0.89507	-89.6094	1	109	11	4	5	44	0
40120.2	2009-11-02 23:59:03	-0.89548	-89.6096	1	109	11	4	5	59	0
40120.3	2009-11-03 00:14:03	-0.89541	-89.6094	1	109	11	4	6	13	59
40120.3	2009-11-03 00:29:03	-0.89522	-89.6095	1	109	11	4	6	29	0
40120.3	2009-11-03 00:44:03	-0.89202	-89.6087	1	109	11	4	6	44	0
40120.3	2009-11-03 01:14:03	-0.8952	-89.6094	1	109	11	4	7	14	0
40120.3	2009-11-03 01:29:03	-0.89516	-89.6096	1	109	11	4	7	29	0
40120.3	2009-11-03 01:44:03	-0.8952	-89.6096	1	109	11	4	7	43	59
40120.3	2009-11-03 01:59:03	-0.89568	-89.6091	1	109	11	4	7	59	0
40120.3	2009-11-03 02:14:03	-0.89538	-89.6095	1	109	11	4	8	14	0
40120.4	2009-11-03 02:44:03	-0.89504	-89.6093	1	109	11	4	8	44	0
40120.4	2009-11-03 02:59:03	-0.89567	-89.6102	1	109	11	4	8	59	0
40120.4	2009-11-03 03:14:03	-0.89533	-89.6095	1	109	11	4	9	13	59
40120.4	2009-11-03 03:29:03	-0.89506	-89.6093	1	109	11	4	9	29	0
40120.4	2009-11-03 04:29:03	-0.89531	-89.6095	1	109	11	4	10	29	0
40120.4	2009-11-03 04:44:03	-0.8951	-89.6097	1	109	11	4	10	43	59
40120.5	2009-11-03 04:59:03	-0.89517	-89.6095	1	109	11	4	10	59	0
40120.5	2009-11-03 06:29:03	-0.89559	-89.6087	1	109	11	4	12	29	0
40120.5	2009-11-03 06:44:03	-0.89536	-89.6093	1	109	11	4	12	44	0
40120.5	2009-11-03 06:59:03	-0.89473	-89.6103	1	109	11	4	12	58	59
40120.6	2009-11-03 07:44:03	-0.89463	-89.6086	1	109	11	4	13	43	59

## Sheet: SCF04_GPS_filtered
40115.7	2009-10-29 09:45:04	-0.90157	-89.6147	1	109	10	30	15	45	0
40115.7	2009-10-29 11:30:03	-0.90183	-89.6144	1	109	10	30	17	30	0
40115.8	2009-10-29 12:30:03	-0.90171	-89.6145	1	109	10	30	18	29	59
40115.8	2009-10-29 12:45:03	-0.90199	-89.6144	1	109	10	30	18	45	0
40115.8	2009-10-29 13:00:03	-0.90202	-89.6144	1	109	10	30	19	0	0
40115.8	2009-10-29 14:00:03	-0.90188	-89.6143	1	109	10	30	19	59	59
40115.8	2009-10-29 14:15:03	-0.90324	-89.6152	1	109	10	30	20	15	0
40115.9	2009-10-29 14:30:03	-0.90158	-89.6143	1	109	10	30	20	30	0
40115.9	2009-10-29 14:45:03	-0.90218	-89.6149	1	109	10	30	20	44	59
40115.9	2009-10-29 15:00:03	-0.90207	-89.6147	1	109	10	30	21	0	0
40115.9	2009-10-29 15:30:03	-0.91453	-89.6097	1	109	10	30	21	29	59
40115.9	2009-10-29 15:45:03	-0.90199	-89.6145	1	109	10	30	21	45	0
40115.9	2009-10-29 16:00:03	-0.90246	-89.6144	1	109	10	30	22	0	0
40115.9	2009-10-29 16:15:03	-0.90095	-89.6145	1	109	10	30	22	14	59
40115.9	2009-10-29 16:45:03	-0.90117	-89.614	1	109	10	30	22	45	0
40116	2009-10-29 17:45:03	-0.90185	-89.6145	1	109	10	30	23	44	59
40116	2009-10-29 18:15:03	-0.90195	-89.6143	1	109	10	31	0	15	0
40116	2009-10-29 18:30:03	-0.90204	-89.6144	1	109	10	31	0	29	59
40116	2009-10-29 18:45:03	-0.90199	-89.6146	1	109	10	31	0	45	0
40116	2009-10-29 19:00:03	-0.90186	-89.6145	1	109	10	31	1	0	0
40116.1	2009-10-29 19:30:03	-0.90197	-89.6146	1	109	10	31	1	30	0
40116.1	2009-10-29 19:45:03	-0.90206	-89.6143	1	109	10	31	1	45	0
40116.1	2009-10-29 20:00:03	-0.90195	-89.6148	1	109	10	31	1	59	59
40116.1	2009-10-29 20:15:03	-0.90159	-89.6148	1	109	10	31	2	15	0
40116.1	2009-10-29 20:30:03	-0.90233	-89.6143	1	109	10	31	2	30	0
40116.1	2009-10-29 20:45:03	-0.90223	-89.6143	1	109	10	31	2	44	59
40116.1	2009-10-29 21:00:03	-0.90207	-89.6146	1	109	10	31	3	0	0
40116.1	2009-10-29 21:15:03	-0.90167	-89.6143	1	109	10	31	3	15	0
40116.1	2009-10-29 21:30:03	-0.90224	-89.6141	1	109	10	31	3	29	59
40116.2	2009-10-29 21:45:03	-0.90197	-89.6147	1	109	10	31	3	45	0
40116.2	2009-10-29 22:45:03	-0.90202	-89.6147	1	109	10	31	4	45	0
40116.2	2009-10-29 23:00:03	-0.90204	-89.6144	1	109	10	31	4	59	59
40116.2	2009-10-29 23:15:03	-0.90212	-89.6144	1	109	10	31	5	15	0
40116.2	2009-10-29 23:30:03	-0.90204	-89.6144	1	109	10	31	5	30	0
40116.2	2009-10-29 23:45:03	-0.90191	-89.6143	1	109	10	31	5	44	59
40116.2	2009-10-30 00:00:03	-0.90244	-89.6151	1	109	10	31	6	0	0
40116.3	2009-10-30 00:30:03	-0.90177	-89.6149	1	109	10	31	6	29	59
40116.3	2009-10-30 01:15:03	-0.90197	-89.6145	1	109	10	31	7	14	59
40116.3	2009-10-30 01:30:03	-0.90209	-89.6144	1	109	10	31	7	30	0
40116.3	2009-10-30 01:45:03	-0.90218	-89.6146	1	109	10	31	7	45	0
40116.3	2009-10-30 02:00:03	-0.90202	-89.6143	1	109	10	31	7	59	59
40116.3	2009-10-30 02:15:03	-0.90227	-89.6145	1	109	10	31	8	15	0
40116.4	2009-10-30 02:30:03	-0.90221	-89.6146	1	109	10	31	8	30	0
40116.4	2009-10-30 04:45:03	-0.90205	-89.6144	1	109	10	31	10	45	0
40116.5	2009-10-30 05:30:03	-0.90215	-89.6145	1	109	10	31	11	30	0
40116.5	2009-10-30 05:45:03	-0.90218	-89.6145	1	109	10	31	11	44	59
40116.5	2009-10-30 06:00:03	-0.90202	-89.6149	1	109	10	31	12	0	0
40116.6	2009-10-30 08:36:43	-0.92283	-89.723	1	109	10	31	14	36	40
40116.8	2009-10-30 13:44:04	-0.94136	-89.7301	1	109	10	31	19	44	0
40117.1	2009-10-30 19:46:01	-0.92177	-89.7659	1	109	11	1	1	45	58
40117.2	2009-10-30 22:17:57	-0.91198	-89.7575	1	109	11	1	4	17	54
40117.3	2009-10-31 01:51:07	-0.87786	-89.7035	1	109	11	1	7	51	4
40117.3	2009-10-31 02:06:47	-0.87787	-89.698	1	109	11	1	8	6	44
40117.4	2009-10-31 03:20:22	-0.90155	-89.6497	1	109	11	1	9	20	19
40117.4	2009-10-31 04:18:03	-0.90255	-89.6148	1	109	11	1	10	18	0
40117.4	2009-10-31 04:33:03	-0.90207	-89.6144	1	109	11	1	10	32	59
40117.4	2009-10-31 04:48:03	-0.90212	-89.6145	1	109	11	1	10	48	0
40117.5	2009-10-31 05:03:03	-0.90208	-89.6145	1	109	11	1	11	3	0
40117.5	2009-10-31 05:18:03	-0.90206	-89.6146	1	109	11	1	11	17	59
40117.5	2009-10-31 05:33:03	-0.90219	-89.6144	1	109	11	1	11	33	0
40117.5	2009-10-31 05:48:03	-0.90211	-89.6142	1	109	11	1	11	48	0
40117.5	2009-10-31 06:03:03	-0.90235	-89.6143	1	109	11	1	12	2	59
40117.6	2009-10-31 07:48:03	-0.90204	-89.6145	1	109	11	1	13	48	0
40117.6	2009-10-31 08:03:03	-0.90204	-89.6143	1	109	11	1	14	3	0
40117.6	2009-10-31 08:18:03	-0.90197	-89.6146	1	109	11	1	14	17	59
40117.6	2009-10-31 08:33:03	-0.90195	-89.6144	1	109	11	1	14	33	0
40117.6	2009-10-31 08:48:03	-0.90335	-89.6149	1	109	11	1	14	48	0
40117.6	2009-10-31 09:33:03	-0.90202	-89.6147	1	109	11	1	15	33	0
40117.7	2009-10-31 09:48:03	-0.90196	-89.6146	1	109	11	1	15	47	59
40117.7	2009-10-31 10:03:03	-0.90194	-89.615	1	109	11	1	16	3	0
40117.7	2009-10-31 10:18:03	-0.9018	-89.6146	1	109	11	1	16	18	0
40117.7	2009-10-31 10:33:03	-0.90197	-89.6146	1	109	11	1	16	32	59
40117.7	2009-10-31 10:48:03	-0.90188	-89.6144	1	109	11	1	16	48	0
40117.7	2009-10-31 11:18:03	-0.90201	-89.6146	1	109	11	1	17	17	59
40117.7	2009-10-31 11:33:03	-0.90148	-89.6134	1	109	11	1	17	33	0
40117.7	2009-10-31 11:48:03	-0.90211	-89.6143	1	109	11	1	17	48	0
40117.8	2009-10-31 12:03:03	-0.90199	-89.6145	1	109	11	1	18	2	59
40117.8	2009-10-31 12:18:03	-0.90197	-89.6144	1	109	11	1	18	18	0
40117.8	2009-10-31 12:33:03	-0.90199	-89.6148	1	109	11	1	18	33	0
40117.8	2009-10-31 12:48:03	-0.90225	-89.6144	1	109	11	1	18	47	59
40117.8	2009-10-31 13:03:03	-0.90187	-89.6147	1	109	11	1	19	3	0
40117.8	2009-10-31 13:33:03	-0.90216	-89.6152	1	109	11	1	19	32	59
40117.8	2009-10-31 13:48:03	-0.90249	-89.6154	1	109	11	1	19	48	0
40117.8	2009-10-31 14:18:03	-0.90212	-89.6144	1	109	11	1	20	17	59
40117.9	2009-10-31 14:33:03	-0.90195	-89.6144	1	109	11	1	20	33	0
40117.9	2009-10-31 14:48:03	-0.90212	-89.6145	1	109	11	1	20	48	0
40117.9	2009-10-31 15:03:03	-0.90219	-89.6148	1	109	11	1	21	2	59
40117.9	2009-10-31 15:33:03	-0.90182	-89.6146	1	109	11	1	21	33	0
40117.9	2009-10-31 15:48:03	-0.90253	-89.615	1	109	11	1	21	47	59
40117.9	2009-10-31 16:03:03	-0.90194	-89.6144	1	109	11	1	22	3	0
40117.9	2009-10-31 16:18:03	-0.90174	-89.6146	1	109	11	1	22	18	0
40117.9	2009-10-31 16:33:03	-0.90211	-89.6145	1	109	11	1	22	32	59
40117.9	2009-10-31 16:48:03	-0.90182	-89.6146	1	109	11	1	22	48	0
40118	2009-10-31 17:18:03	-0.90204	-89.6146	1	109	11	1	23	17	59
40118	2009-10-31 17:33:03	-0.90203	-89.6146	1	109	11	1	23	33	0
40118	2009-10-31 17:48:03	-0.90199	-89.6146	1	109	11	1	23	48	0
40118	2009-10-31 18:03:03	-0.90192	-89.6147	1	109	11	2	0	2	59
40118	2009-10-31 18:18:03	-0.90183	-89.6145	1	109	11	2	0	18	0
40118	2009-10-31 18:33:03	-0.90186	-89.6148	1	109	11	2	0	33	0
40118	2009-10-31 18:48:03	-0.9019	-89.6147	1	109	11	2	0	47	59
40118.1	2009-10-31 19:18:03	-0.90195	-89.6148	1	109	11	2	1	18	0
40118.1	2009-10-31 19:33:03	-0.90201	-89.6147	1	109	11	2	1	32	59
40118.1	2009-10-31 19:48:03	-0.90198	-89.6148	1	109	11	2	1	48	0
40118.1	2009-10-31 20:03:03	-0.90266	-89.615	1	109	11	2	2	3	0
40118.1	2009-10-31 20:18:03	-0.90194	-89.6148	1	109	11	2	2	17	59
40118.1	2009-10-31 20:33:03	-0.90184	-89.6147	1	109	11	2	2	33	0
40118.1	2009-10-31 20:48:03	-0.90182	-89.6149	1	109	11	2	2	48	0
40118.1	2009-10-31 21:03:03	-0.90196	-89.6147	1	109	11	2	3	2	59
40118.1	2009-10-31 21:18:03	-0.90195	-89.6147	1	109	11	2	3	18	0
40118.1	2009-10-31 21:33:03	-0.90207	-89.6146	1	109	11	2	3	33	0
40118.2	2009-10-31 21:48:03	-0.90197	-89.6144	1	109	11	2	3	47	59
40118.2	2009-10-31 22:03:03	-0.90208	-89.6147	1	109	11	2	4	3	0
40118.2	2009-10-31 22:18:03	-0.90197	-89.6147	1	109	11	2	4	18	0
40118.2	2009-10-31 22:33:03	-0.9021	-89.6148	1	109	11	2	4	32	59
40118.2	2009-10-31 22:48:03	-0.90207	-89.6146	1	109	11	2	4	48	0
40118.2	2009-10-31 23:03:03	-0.90203	-89.6149	1	109	11	2	5	3	0
40118.2	2009-10-31 23:18:03	-0.90195	-89.6148	1	109	11	2	5	17	59
40118.2	2009-10-31 23:33:03	-0.90185	-89.6151	1	109	11	2	5	33	0
40118.2	2009-10-31 23:48:03	-0.90166	-89.615	1	109	11	2	5	48	0
40118.3	2009-11-01 00:03:03	-0.9019	-89.6145	1	109	11	2	6	2	59
40118.3	2009-11-01 00:18:03	-0.90192	-89.6144	1	109	11	2	6	18	0
40118.3	2009-11-01 00:33:03	-0.90207	-89.6147	1	109	11	2	6	33	0
40118.3	2009-11-01 00:48:03	-0.90212	-89.6147	1	109	11	2	6	47	59
40118.3	2009-11-01 01:03:03	-0.90218	-89.6147	1	109	11	2	7	3	0
40118.3	2009-11-01 01:18:03	-0.90199	-89.6148	1	109	11	2	7	18	0
40118.3	2009-11-01 01:33:03	-0.90196	-89.6148	1	109	11	2	7	32	59
40118.3	2009-11-01 01:48:03	-0.90203	-89.6148	1	109	11	2	7	48	0
40118.3	2009-11-01 02:03:03	-0.90209	-89.6147	1	109	11	2	8	3	0
40118.3	2009-11-01 02:18:03	-0.90216	-89.6148	1	109	11	2	8	17	59
40118.4	2009-11-01 02:33:03	-0.90217	-89.6147	1	109	11	2	8	33	0
40118.4	2009-11-01 02:48:03	-0.90208	-89.6148	1	109	11	2	8	48	0
40118.4	2009-11-01 03:03:03	-0.90194	-89.6146	1	109	11	2	9	2	59
40118.4	2009-11-01 03:18:03	-0.90213	-89.615	1	109	11	2	9	18	0
40118.4	2009-11-01 03:33:03	-0.90216	-89.6149	1	109	11	2	9	33	0
40118.4	2009-11-01 03:48:03	-0.90212	-89.6151	1	109	11	2	9	47	59
40118.4	2009-11-01 04:03:03	-0.902	-89.6148	1	109	11	2	10	3	0
40118.4	2009-11-01 04:48:03	-0.90246	-89.6151	1	109	11	2	10	48	0
40118.5	2009-11-01 05:03:03	-0.90213	-89.6146	1	109	11	2	11	3	0
40118.5	2009-11-01 05:18:03	-0.90213	-89.6148	1	109	11	2	11	17	59
40118.5	2009-11-01 05:33:03	-0.90203	-89.6147	1	109	11	2	11	33	0
40118.5	2009-11-01 05:48:03	-0.90219	-89.6145	1	109	11	2	11	48	0
40118.5	2009-11-01 06:03:03	-0.90201	-89.6147	1	109	11	2	12	2	59
40118.5	2009-11-01 06:18:03	-0.90217	-89.6147	1	109	11	2	12	18	0
40118.5	2009-11-01 06:48:03	-0.90369	-89.6183	1	109	11	2	12	47	59
40118.5	2009-11-01 07:03:03	-0.90173	-89.6151	1	109	11	2	13	3	0
40118.6	2009-11-01 07:18:03	-0.90202	-89.6146	1	109	11	2	13	18	0
40118.6	2009-11-01 07:33:03	-0.90201	-89.6148	1	109	11	2	13	32	59
40118.6	2009-11-01 07:48:03	-0.90212	-89.6146	1	109	11	2	13	48	0
40118.6	2009-11-01 08:03:03	-0.90199	-89.6146	1	109	11	2	14	3	0
40118.6	2009-11-01 08:18:03	-0.902	-89.6147	1	109	11	2	14	17	59
40118.6	2009-11-01 08:33:03	-0.902	-89.6148	1	109	11	2	14	33	0
40118.6	2009-11-01 08:48:03	-0.90216	-89.6144	1	109	11	2	14	48	0
40118.6	2009-11-01 09:03:03	-0.902	-89.6148	1	109	11	2	15	2	59
40118.6	2009-11-01 09:18:03	-0.90222	-89.6143	1	109	11	2	15	18	0
40118.6	2009-11-01 09:33:03	-0.90172	-89.6147	1	109	11	2	15	33	0
40118.7	2009-11-01 09:48:03	-0.90179	-89.6147	1	109	11	2	15	47	59
40118.7	2009-11-01 10:03:03	-0.902	-89.6147	1	109	11	2	16	3	0
40118.7	2009-11-01 10:18:03	-0.90185	-89.6149	1	109	11	2	16	18	0
40118.7	2009-11-01 10:33:03	-0.90198	-89.6149	1	109	11	2	16	32	59
40118.7	2009-11-01 10:48:03	-0.902	-89.615	1	109	11	2	16	48	0
40118.7	2009-11-01 11:03:03	-0.90192	-89.6146	1	109	11	2	17	3	0
40118.7	2009-11-01 11:18:03	-0.90219	-89.6145	1	109	11	2	17	17	59
40118.7	2009-11-01 11:33:03	-0.90187	-89.6145	1	109	11	2	17	33	0
40118.7	2009-11-01 11:48:03	-0.90205	-89.6147	1	109	11	2	17	48	0
40118.8	2009-11-01 12:03:03	-0.90194	-89.6148	1	109	11	2	18	2	59
40118.8	2009-11-01 12:32:03	-0.902	-89.6147	1	109	11	2	18	31	59
40118.8	2009-11-01 12:47:23	-0.90197	-89.6147	1	109	11	2	18	47	19
40118.8	2009-11-01 13:03:03	-0.90213	-89.6144	1	109	11	2	19	3	0
40118.8	2009-11-01 13:19:22	-0.90152	-89.6144	1	109	11	2	19	19	18
40118.8	2009-11-01 13:35:03	-0.90234	-89.6145	1	109	11	2	19	34	59
40118.8	2009-11-01 13:50:03	-0.902	-89.6146	1	109	11	2	19	50	0
40118.8	2009-11-01 14:05:03	-0.90194	-89.6143	1	109	11	2	20	5	0
40118.9	2009-11-01 14:35:03	-0.90226	-89.6148	1	109	11	2	20	35	0
40118.9	2009-11-01 14:50:03	-0.90192	-89.615	1	109	11	2	20	50	0
40118.9	2009-11-01 15:05:03	-0.90196	-89.6148	1	109	11	2	21	4	59
40118.9	2009-11-01 15:20:03	-0.90145	-89.615	1	109	11	2	21	20	0
40118.9	2009-11-01 15:35:03	-0.90197	-89.6149	1	109	11	2	21	35	0
40118.9	2009-11-01 15:50:03	-0.90181	-89.6143	1	109	11	2	21	49	59
40119	2009-11-01 18:05:03	-0.90193	-89.6145	1	109	11	3	0	4	59
40119	2009-11-01 18:20:03	-0.90145	-89.6143	1	109	11	3	0	20	0
40119	2009-11-01 18:35:03	-0.90198	-89.6147	1	109	11	3	0	35	0
40119	2009-11-01 18:50:03	-0.90202	-89.6146	1	109	11	3	0	49	59
40119.1	2009-11-01 19:50:03	-0.90197	-89.6147	1	109	11	3	1	50	0
40119.1	2009-11-01 20:05:03	-0.90216	-89.6148	1	109	11	3	2	5	0
40119.1	2009-11-01 20:20:03	-0.90214	-89.6145	1	109	11	3	2	19	59
40119.1	2009-11-01 21:05:03	-0.90194	-89.6149	1	109	11	3	3	4	59
40119.1	2009-11-01 21:20:03	-0.90201	-89.6148	1	109	11	3	3	20	0
40119.1	2009-11-01 21:35:03	-0.90166	-89.6148	1	109	11	3	3	35	0
40119.2	2009-11-01 21:50:03	-0.90209	-89.6147	1	109	11	3	3	49	59
40119.2	2009-11-01 22:05:03	-0.90203	-89.6147	1	109	11	3	4	5	0
40119.2	2009-11-01 22:20:03	-0.90187	-89.6146	1	109	11	3	4	20	0
40119.2	2009-11-01 22:35:03	-0.90222	-89.6145	1	109	11	3	4	34	59
40119.2	2009-11-01 22:50:03	-0.90187	-89.6145	1	109	11	3	4	50	0
40119.2	2009-11-01 23:05:03	-0.90194	-89.6146	1	109	11	3	5	5	0
40119.3	2009-11-02 00:35:03	-0.90184	-89.6146	1	109	11	3	6	35	0
40119.3	2009-11-02 00:50:03	-0.90243	-89.6146	1	109	11	3	6	49	59
40119.3	2009-11-02 01:05:03	-0.90219	-89.6147	1	109	11	3	7	5	0
40119.3	2009-11-02 01:20:03	-0.90186	-89.6143	1	109	11	3	7	20	0
40119.3	2009-11-02 01:35:03	-0.90174	-89.6147	1	109	11	3	7	34	59
40119.3	2009-11-02 01:50:03	-0.90234	-89.6145	1	109	11	3	7	50	0
40119.3	2009-11-02 02:05:03	-0.9016	-89.6142	1	109	11	3	8	5	0
40119.4	2009-11-02 02:35:03	-0.90263	-89.6152	1	109	11	3	8	35	0
40119.4	2009-11-02 03:05:03	-0.90301	-89.6201	1	109	11	3	9	4	59
40119.4	2009-11-02 03:20:03	-0.90204	-89.6146	1	109	11	3	9	20	0
40119.4	2009-11-02 03:35:03	-0.90212	-89.6147	1	109	11	3	9	35	0
40119.4	2009-11-02 03:50:03	-0.90219	-89.6149	1	109	11	3	9	49	59
40119.4	2009-11-02 04:05:03	-0.902	-89.6145	1	109	11	3	10	5	0
40119.6	2009-11-02 09:19:05	-1.00838	-89.6894	1	109	11	3	15	19	2
40119.7	2009-11-02 10:48:29	-1.01289	-89.6675	1	109	11	3	16	48	25
40119.7	2009-11-02 11:26:09	-1.02267	-89.669	1	109	11	3	17	26	6
40120	2009-11-02 19:05:57	-0.93453	-89.7406	1	109	11	4	1	5	53
40120.3	2009-11-03 01:17:52	-0.86939	-89.8071	1	109	11	4	7	17	49
40120.6	2009-11-03 07:46:31	-0.87354	-89.8256	1	109	11	4	13	46	28
40120.7	2009-11-03 11:10:04	-0.87736	-89.8236	1	109	11	4	17	10	1
40120.8	2009-11-03 12:21:32	-0.9099	-89.8224	1	109	11	4	18	21	29
40120.8	2009-11-03 14:09:26	-0.87142	-89.7912	1	109	11	4	20	9	23
40121.1	2009-11-03 19:54:03	-0.90217	-89.6145	1	109	11	5	1	54	0
40121.1	2009-11-03 20:24:03	-0.90196	-89.6148	1	109	11	5	2	24	0
40121.1	2009-11-03 20:39:03	-0.9019	-89.6145	1	109	11	5	2	39	0
40121.1	2009-11-03 20:54:03	-0.90212	-89.6147	1	109	11	5	2	53	59
40121.1	2009-11-03 21:09:03	-0.90209	-89.6145	1	109	11	5	3	9	0
40121.1	2009-11-03 21:24:03	-0.9018	-89.6147	1	109	11	5	3	24	0
40121.2	2009-11-03 21:39:03	-0.90212	-89.6146	1	109	11	5	3	38	59
40121.2	2009-11-03 21:54:03	-0.90198	-89.6146	1	109	11	5	3	54	0
40121.2	2009-11-03 22:09:03	-0.90198	-89.6148	1	109	11	5	4	9	0
40121.2	2009-11-03 22:24:03	-0.90198	-89.6146	1	109	11	5	4	23	59
40121.2	2009-11-03 22:39:03	-0.90201	-89.615	1	109	11	5	4	39	0
40121.2	2009-11-03 22:54:03	-0.90193	-89.6147	1	109	11	5	4	54	0
40121.2	2009-11-03 23:09:03	-0.90183	-89.6149	1	109	11	5	5	8	59
40121.2	2009-11-03 23:24:03	-0.90171	-89.6148	1	109	11	5	5	24	0
40121.2	2009-11-03 23:39:03	-0.90217	-89.6148	1	109	11	5	5	39	0
40121.2	2009-11-03 23:54:03	-0.90156	-89.6149	1	109	11	5	5	53	59
40121.3	2009-11-04 00:09:03	-0.90163	-89.6145	1	109	11	5	6	9	0
40121.3	2009-11-04 00:24:03	-0.90173	-89.6145	1	109	11	5	6	24	0
40121.3	2009-11-04 00:39:03	-0.90689	-89.6161	1	109	11	5	6	38	59
40121.3	2009-11-04 00:54:03	-0.90189	-89.6148	1	109	11	5	6	54	0
40121.3	2009-11-04 01:09:03	-0.90205	-89.6144	1	109	11	5	7	9	0
40121.3	2009-11-04 01:24:03	-0.90214	-89.6148	1	109	11	5	7	23	59
40121.3	2009-11-04 01:39:03	-0.90207	-89.6147	1	109	11	5	7	39	0
40121.3	2009-11-04 01:54:03	-0.90204	-89.6146	1	109	11	5	7	54	0
40121.3	2009-11-04 02:09:03	-0.90206	-89.6148	1	109	11	5	8	8	59
40121.3	2009-11-04 02:24:03	-0.90207	-89.6148	1	109	11	5	8	24	0
40121.4	2009-11-04 02:54:03	-0.90204	-89.6144	1	109	11	5	8	53	59
40121.4	2009-11-04 03:09:03	-0.90212	-89.6142	1	109	11	5	9	9	0
40121.4	2009-11-04 03:24:03	-0.90194	-89.6148	1	109	11	5	9	24	0
40121.4	2009-11-04 03:39:03	-0.90196	-89.6148	1	109	11	5	9	38	59
40121.4	2009-11-04 04:24:03	-0.9029	-89.6156	1	109	11	5	10	23	59
40121.5	2009-11-04 04:54:03	-0.9021	-89.6145	1	109	11	5	10	54	0
40121.5	2009-11-04 05:24:03	-0.9033	-89.6145	1	109	11	5	11	24	0
40121.5	2009-11-04 05:53:03	-0.89955	-89.6113	1	109	11	5	11	53	0
40121.5	2009-11-04 06:08:03	-0.90005	-89.6117	1	109	11	5	12	8	0
40121.5	2009-11-04 06:52:03	-0.90127	-89.6152	1	109	11	5	12	51	59
40121.5	2009-11-04 07:07:03	-0.90147	-89.6151	1	109	11	5	13	7	0
40121.6	2009-11-04 07:22:03	-0.90135	-89.6152	1	109	11	5	13	21	59

## Sheet: SCF05_GPS_filtered
40115.7	2009-10-29 11:38:20	-0.89891	-89.6016	1	109	10	30	17	38	17
40115.8	2009-10-29 12:09:03	-0.88304	-89.6112	1	109	10	30	18	9	0
40115.8	2009-10-29 12:24:03	-0.89256	-89.6021	1	109	10	30	18	24	0
40115.8	2009-10-29 12:54:03	-0.89463	-89.6102	1	109	10	30	18	54	0
40115.8	2009-10-29 14:09:03	-0.83622	-89.5354	1	109	10	30	20	8	59
40115.9	2009-10-29 15:36:03	-0.90117	-89.6154	1	109	10	30	21	36	0
40115.9	2009-10-29 15:51:03	-0.90143	-89.6149	1	109	10	30	21	51	0
40115.9	2009-10-29 16:06:03	-0.90214	-89.6193	1	109	10	30	22	5	59
40115.9	2009-10-29 16:21:03	-0.90132	-89.6152	1	109	10	30	22	21	0
40115.9	2009-10-29 16:36:03	-0.90105	-89.6153	1	109	10	30	22	36	0
40116	2009-10-29 16:51:03	-0.90112	-89.6149	1	109	10	30	22	50	59
40116	2009-10-29 17:06:03	-0.9013	-89.6151	1	109	10	30	23	6	0
40116	2009-10-29 17:21:03	-0.90137	-89.6148	1	109	10	30	23	21	0
40116	2009-10-29 17:36:03	-0.90124	-89.6154	1	109	10	30	23	35	59
40116	2009-10-29 17:51:03	-0.90176	-89.6148	1	109	10	30	23	51	0
40116	2009-10-29 18:06:03	-0.90111	-89.6153	1	109	10	31	0	6	0
40116	2009-10-29 18:21:03	-0.90142	-89.6149	1	109	10	31	0	20	59
40116	2009-10-29 18:36:03	-0.90126	-89.615	1	109	10	31	0	36	0
40116	2009-10-29 18:51:03	-0.90127	-89.6153	1	109	10	31	0	51	0
40116	2009-10-29 19:06:03	-0.902	-89.6149	1	109	10	31	1	5	59
40116.1	2009-10-29 19:21:03	-0.90111	-89.6152	1	109	10	31	1	21	0
40116.1	2009-10-29 19:36:03	-0.90194	-89.6152	1	109	10	31	1	36	0
40116.1	2009-10-29 19:51:03	-0.90136	-89.6147	1	109	10	31	1	50	59
40116.1	2009-10-29 20:06:03	-0.90144	-89.615	1	109	10	31	2	6	0
40116.1	2009-10-29 20:21:03	-0.90134	-89.6154	1	109	10	31	2	21	0
40116.1	2009-10-29 20:36:03	-0.90159	-89.6155	1	109	10	31	2	35	59
40116.1	2009-10-29 20:51:03	-0.9012	-89.6154	1	109	10	31	2	51	0
40116.1	2009-10-29 21:06:03	-0.90132	-89.6153	1	109	10	31	3	6	0
40116.1	2009-10-29 21:21:03	-0.90149	-89.6151	1	109	10	31	3	20	59
40116.2	2009-10-29 21:36:03	-0.90128	-89.6152	1	109	10	31	3	36	0
40116.2	2009-10-29 21:51:03	-0.90075	-89.6153	1	109	10	31	3	51	0
40116.2	2009-10-29 22:06:03	-0.90112	-89.6152	1	109	10	31	4	5	59
40116.2	2009-10-29 22:21:03	-0.9015	-89.6151	1	109	10	31	4	21	0
40116.2	2009-10-29 22:51:03	-0.86412	-89.6041	1	109	10	31	4	50	59
40116.2	2009-10-29 23:06:03	-0.87836	-89.6061	1	109	10	31	5	6	0
40116.2	2009-10-29 23:36:03	-0.90149	-89.6152	1	109	10	31	5	35	59
40116.2	2009-10-29 23:51:03	-0.90113	-89.6153	1	109	10	31	5	51	0
40116.3	2009-10-30 00:06:03	-0.9018	-89.6151	1	109	10	31	6	6	0
40116.3	2009-10-30 00:21:03	-0.90168	-89.6149	1	109	10	31	6	20	59
40116.3	2009-10-30 00:36:03	-0.9015	-89.6151	1	109	10	31	6	36	0
40116.3	2009-10-30 00:51:03	-0.90135	-89.6154	1	109	10	31	6	51	0
40116.3	2009-10-30 01:06:03	-0.90122	-89.6154	1	109	10	31	7	5	59
40116.3	2009-10-30 01:21:03	-0.90144	-89.6155	1	109	10	31	7	21	0
40116.3	2009-10-30 02:06:03	-0.90163	-89.6154	1	109	10	31	8	6	0
40116.3	2009-10-30 02:21:03	-0.90202	-89.6158	1	109	10	31	8	21	0
40116.4	2009-10-30 02:36:03	-0.90136	-89.6152	1	109	10	31	8	35	59
40116.4	2009-10-30 02:51:03	-0.9016	-89.6149	1	109	10	31	8	51	0
40116.4	2009-10-30 03:06:03	-0.9019	-89.6173	1	109	10	31	9	6	0
40116.4	2009-10-30 03:21:03	-0.9019	-89.6157	1	109	10	31	9	20	59
40116.4	2009-10-30 03:36:03	-0.90144	-89.6148	1	109	10	31	9	36	0
40116.4	2009-10-30 03:51:03	-0.90468	-89.6154	1	109	10	31	9	51	0
40116.4	2009-10-30 04:06:03	-0.90133	-89.6149	1	109	10	31	10	5	59
40116.5	2009-10-30 05:06:03	-0.9015	-89.6151	1	109	10	31	11	6	0
40116.7	2009-10-30 09:44:53	-0.88584	-89.8158	1	109	10	31	15	44	49
40116.9	2009-10-30 15:41:12	-0.88185	-89.85	1	109	10	31	21	41	9
40117	2009-10-30 16:48:04	-0.84541	-89.8347	1	109	10	31	22	48	0
40117	2009-10-30 18:13:32	-0.84347	-89.8474	1	109	11	1	0	13	28
40117	2009-10-30 19:11:07	-0.8437	-89.8714	1	109	11	1	1	11	3
40117.1	2009-10-30 20:46:42	-0.84257	-89.8781	1	109	11	1	2	46	39
40117.2	2009-10-30 22:20:23	-0.82614	-89.8899	1	109	11	1	4	20	20
40117.3	2009-10-31 00:15:59	-0.76643	-89.9082	1	109	11	1	6	15	55
40117.5	2009-10-31 05:08:16	-0.72903	-89.9699	1	109	11	1	11	8	13
40117.9	2009-10-31 15:56:03	-0.77201	-89.8811	1	109	11	1	21	56	0
40117.9	2009-10-31 16:11:05	-0.77955	-89.8799	1	109	11	1	22	11	2
40118	2009-10-31 18:52:34	-0.8293	-89.8763	1	109	11	2	0	52	31
40118.1	2009-10-31 19:42:04	-0.84407	-89.8745	1	109	11	2	1	42	0
40118.1	2009-10-31 21:28:06	-0.83788	-89.8612	1	109	11	2	3	28	3
40118.3	2009-11-01 02:02:09	-0.84484	-89.6932	1	109	11	2	8	2	5
40118.4	2009-11-01 04:25:03	-0.90079	-89.6151	1	109	11	2	10	25	0
40118.4	2009-11-01 04:40:03	-0.90153	-89.6155	1	109	11	2	10	39	59
40118.5	2009-11-01 04:55:03	-0.90171	-89.6157	1	109	11	2	10	54	59
40118.5	2009-11-01 05:10:03	-0.90164	-89.6153	1	109	11	2	11	10	0
40118.5	2009-11-01 05:25:03	-0.90143	-89.615	1	109	11	2	11	24	59
40118.5	2009-11-01 05:40:03	-0.90145	-89.6152	1	109	11	2	11	39	59
40118.5	2009-11-01 05:55:03	-0.9014	-89.6154	1	109	11	2	11	55	0
40118.5	2009-11-01 06:10:03	-0.90159	-89.6154	1	109	11	2	12	9	59
40118.5	2009-11-01 06:25:03	-0.90156	-89.6153	1	109	11	2	12	24	59
40118.5	2009-11-01 06:40:03	-0.90174	-89.6156	1	109	11	2	12	40	0
40118.5	2009-11-01 06:55:03	-0.90146	-89.6153	1	109	11	2	12	54	59
40118.5	2009-11-01 07:10:03	-0.90183	-89.6165	1	109	11	2	13	9	59
40118.6	2009-11-01 07:25:03	-0.90187	-89.6149	1	109	11	2	13	25	0
40118.6	2009-11-01 07:40:03	-0.90147	-89.6151	1	109	11	2	13	39	59
40118.6	2009-11-01 07:55:03	-0.90163	-89.6154	1	109	11	2	13	54	59
40118.6	2009-11-01 08:10:03	-0.90168	-89.6152	1	109	11	2	14	10	0
40118.6	2009-11-01 08:25:03	-0.90144	-89.615	1	109	11	2	14	24	59
40118.6	2009-11-01 08:40:03	-0.90139	-89.6154	1	109	11	2	14	39	59
40118.6	2009-11-01 09:25:03	-0.90141	-89.6155	1	109	11	2	15	24	59
40118.7	2009-11-01 09:40:03	-0.90182	-89.614	1	109	11	2	15	40	0
40118.7	2009-11-01 09:55:03	-0.90129	-89.6156	1	109	11	2	15	54	59
40118.7	2009-11-01 10:10:03	-0.90124	-89.6158	1	109	11	2	16	9	59
40118.7	2009-11-01 10:25:03	-0.90122	-89.6155	1	109	11	2	16	25	0
40118.7	2009-11-01 10:40:03	-0.90133	-89.6158	1	109	11	2	16	39	59
40118.7	2009-11-01 10:55:03	-0.90138	-89.6158	1	109	11	2	16	54	59
40118.7	2009-11-01 11:10:03	-0.90118	-89.6158	1	109	11	2	17	10	0
40118.8	2009-11-01 12:10:03	-0.90166	-89.6152	1	109	11	2	18	9	59
40118.8	2009-11-01 12:25:03	-0.90125	-89.6148	1	109	11	2	18	24	59
40118.8	2009-11-01 14:08:03	-0.90169	-89.6154	1	109	11	2	20	8	0
40118.9	2009-11-01 14:38:03	-0.90206	-89.6154	1	109	11	2	20	37	59
40118.9	2009-11-01 14:53:03	-0.90143	-89.6155	1	109	11	2	20	53	0
40118.9	2009-11-01 15:23:03	-0.9015	-89.6154	1	109	11	2	21	22	59
40119.1	2009-11-01 19:38:03	-0.90168	-89.6153	1	109	11	3	1	38	0
40119.1	2009-11-01 19:53:03	-0.9006	-89.6155	1	109	11	3	1	52	59
40119.1	2009-11-01 20:08:03	-0.90158	-89.6154	1	109	11	3	2	8	0
40119.1	2009-11-01 20:23:03	-0.90156	-89.6152	1	109	11	3	2	23	0
40119.1	2009-11-01 20:38:03	-0.90148	-89.6148	1	109	11	3	2	37	59
40119.1	2009-11-01 20:53:03	-0.90136	-89.615	1	109	11	3	2	53	0
40119.1	2009-11-01 21:08:03	-0.90126	-89.615	1	109	11	3	3	8	0
40119.1	2009-11-01 21:23:03	-0.90174	-89.6158	1	109	11	3	3	22	59
40119.2	2009-11-01 21:38:03	-0.90144	-89.6148	1	109	11	3	3	38	0
40119.2	2009-11-01 21:53:03	-0.90133	-89.6154	1	109	11	3	3	53	0
40119.2	2009-11-01 22:08:03	-0.90152	-89.6158	1	109	11	3	4	7	59
40119.2	2009-11-01 22:23:03	-0.90104	-89.6151	1	109	11	3	4	23	0
40119.2	2009-11-01 22:38:03	-0.90153	-89.6153	1	109	11	3	4	38	0
40119.2	2009-11-01 22:53:03	-0.90162	-89.6154	1	109	11	3	4	52	59
40119.2	2009-11-01 23:08:03	-0.90166	-89.6154	1	109	11	3	5	8	0
40119.2	2009-11-01 23:23:03	-0.90164	-89.6153	1	109	11	3	5	23	0
40119.2	2009-11-01 23:38:03	-0.90136	-89.615	1	109	11	3	5	37	59
40119.2	2009-11-01 23:53:03	-0.90158	-89.6151	1	109	11	3	5	53	0
40119.3	2009-11-02 00:08:03	-0.90178	-89.6147	1	109	11	3	6	8	0
40119.3	2009-11-02 00:23:03	-0.90149	-89.6155	1	109	11	3	6	22	59
40119.3	2009-11-02 00:38:03	-0.9016	-89.6149	1	109	11	3	6	38	0
40119.3	2009-11-02 00:53:03	-0.9017	-89.6151	1	109	11	3	6	53	0
40119.3	2009-11-02 01:08:03	-0.90152	-89.6155	1	109	11	3	7	7	59
40119.3	2009-11-02 01:23:03	-0.90156	-89.6146	1	109	11	3	7	23	0
40119.3	2009-11-02 01:38:03	-0.90151	-89.6151	1	109	11	3	7	38	0
40119.3	2009-11-02 01:53:03	-0.90155	-89.6156	1	109	11	3	7	52	59
40119.3	2009-11-02 02:08:03	-0.90144	-89.6157	1	109	11	3	8	8	0
40119.3	2009-11-02 02:23:03	-0.90235	-89.6142	1	109	11	3	8	23	0
40119.4	2009-11-02 02:38:03	-0.90157	-89.6151	1	109	11	3	8	37	59
40119.4	2009-11-02 02:53:03	-0.90143	-89.6152	1	109	11	3	8	53	0
40119.4	2009-11-02 03:23:03	-0.90157	-89.6154	1	109	11	3	9	22	59
40119.4	2009-11-02 03:38:03	-0.9016	-89.6151	1	109	11	3	9	38	0
40119.4	2009-11-02 03:53:03	-0.90177	-89.6159	1	109	11	3	9	53	0
40119.4	2009-11-02 04:08:03	-0.90192	-89.6157	1	109	11	3	10	7	59
40119.4	2009-11-02 04:23:03	-0.90254	-89.6164	1	109	11	3	10	23	0
40119.4	2009-11-02 04:38:03	-0.90172	-89.6159	1	109	11	3	10	38	0
40119.5	2009-11-02 04:53:03	-0.90172	-89.6156	1	109	11	3	10	52	59
40119.5	2009-11-02 05:08:03	-0.90117	-89.6261	1	109	11	3	11	8	0
40119.5	2009-11-02 06:34:19	-0.92521	-89.6847	1	109	11	3	12	34	16
40119.7	2009-11-02 09:47:03	-0.92197	-89.6996	1	109	11	3	15	47	0
40119.8	2009-11-02 14:22:54	-0.9328	-89.7008	1	109	11	3	20	22	50
40120.2	2009-11-02 21:44:20	-0.92149	-89.7278	1	109	11	4	3	44	16
40120.2	2009-11-02 23:32:52	-0.91674	-89.7247	1	109	11	4	5	32	48
40120.5	2009-11-03 05:15:03	-0.94537	-89.7303	1	109	11	4	11	15	0
40120.5	2009-11-03 06:35:04	-0.94402	-89.7192	1	109	11	4	12	35	1
40120.6	2009-11-03 08:58:07	-1.02024	-89.6916	1	109	11	4	14	58	4
40121	2009-11-03 18:54:03	-0.9013	-89.6156	1	109	11	5	0	54	0
40121	2009-11-03 19:09:03	-0.9013	-89.6153	1	109	11	5	1	9	0
40121.1	2009-11-03 19:24:03	-0.90136	-89.6155	1	109	11	5	1	23	59
40121.1	2009-11-03 19:39:03	-0.90151	-89.6153	1	109	11	5	1	39	0
40121.1	2009-11-03 19:54:03	-0.90141	-89.6153	1	109	11	5	1	54	0
40121.1	2009-11-03 20:09:03	-0.90195	-89.6154	1	109	11	5	2	8	59
40121.1	2009-11-03 20:24:03	-0.90124	-89.6156	1	109	11	5	2	24	0
40121.1	2009-11-03 20:39:03	-0.90239	-89.615	1	109	11	5	2	39	0
40121.1	2009-11-03 20:54:03	-0.90111	-89.6155	1	109	11	5	2	53	59
40121.1	2009-11-03 21:09:03	-0.9012	-89.6155	1	109	11	5	3	9	0
40121.1	2009-11-03 21:24:03	-0.90106	-89.6162	1	109	11	5	3	24	0
40121.2	2009-11-03 21:39:03	-0.90227	-89.6156	1	109	11	5	3	38	59
40121.2	2009-11-03 22:54:03	-0.90107	-89.6156	1	109	11	5	4	54	0
40121.2	2009-11-03 23:09:03	-0.9	-89.6151	1	109	11	5	5	8	59
40121.3	2009-11-04 00:09:03	-0.90133	-89.6152	1	109	11	5	6	9	0
40121.3	2009-11-04 00:24:03	-0.90147	-89.6154	1	109	11	5	6	24	0
40121.3	2009-11-04 00:39:03	-0.90188	-89.6154	1	109	11	5	6	38	59
40121.3	2009-11-04 00:54:03	-0.90122	-89.6154	1	109	11	5	6	54	0
40121.3	2009-11-04 01:09:03	-0.90168	-89.6153	1	109	11	5	7	9	0
40121.3	2009-11-04 01:39:03	-0.9017	-89.6153	1	109	11	5	7	39	0
40121.3	2009-11-04 01:54:03	-0.90147	-89.6154	1	109	11	5	7	54	0
40121.4	2009-11-04 02:39:03	-0.90212	-89.6149	1	109	11	5	8	39	0
40121.4	2009-11-04 02:54:03	-0.90151	-89.6151	1	109	11	5	8	53	59
40121.4	2009-11-04 03:54:03	-0.90168	-89.6157	1	109	11	5	9	54	0
40121.4	2009-11-04 04:24:03	-0.90252	-89.6164	1	109	11	5	10	23	59
40121.4	2009-11-04 04:39:03	-0.90104	-89.6145	1	109	11	5	10	39	0
40121.6	2009-11-04 07:50:47	-0.89153	-89.6306	1	109	11	5	13	50	44
40122	2009-11-04 18:05:03	-0.95176	-89.619	1	109	11	6	0	4	59
40122	2009-11-04 18:35:03	-0.91247	-89.6266	1	109	11	6	0	35	0
40122	2009-11-04 18:50:03	-0.913	-89.6269	1	109	11	6	0	49	59
40122	2009-11-04 19:05:03	-0.91238	-89.6269	1	109	11	6	1	5	0
40122.1	2009-11-04 19:20:03	-0.91235	-89.6267	1	109	11	6	1	20	0
40122.1	2009-11-04 19:35:03	-0.91242	-89.6269	1	109	11	6	1	34	59
40122.1	2009-11-04 19:50:03	-0.91238	-89.627	1	109	11	6	1	50	0
40122.1	2009-11-04 20:05:03	-0.91263	-89.627	1	109	11	6	2	5	0
40122.1	2009-11-04 20:20:03	-0.91232	-89.6271	1	109	11	6	2	19	59
40122.1	2009-11-04 20:35:03	-0.89815	-89.6138	1	109	11	6	2	35	0
40122.1	2009-11-04 21:05:03	-0.9129	-89.6266	1	109	11	6	3	4	59
40122.1	2009-11-04 21:20:03	-0.91303	-89.6275	1	109	11	6	3	20	0
40122.1	2009-11-04 21:35:03	-0.9124	-89.6269	1	109	11	6	3	35	0
40122.2	2009-11-04 21:50:03	-0.91261	-89.627	1	109	11	6	3	49	59
40122.2	2009-11-04 22:05:03	-0.91271	-89.6274	1	109	11	6	4	5	0
40122.2	2009-11-04 22:20:03	-0.91219	-89.6267	1	109	11	6	4	20	0
40122.2	2009-11-04 22:35:03	-0.91197	-89.627	1	109	11	6	4	34	59
40122.2	2009-11-04 22:50:03	-0.91215	-89.627	1	109	11	6	4	50	0
40122.2	2009-11-04 23:05:03	-0.91235	-89.6265	1	109	11	6	5	5	0
40122.2	2009-11-04 23:20:03	-0.91223	-89.6272	1	109	11	6	5	19	59
40122.2	2009-11-04 23:35:03	-0.91257	-89.6266	1	109	11	6	5	35	0
40122.2	2009-11-04 23:50:03	-0.9126	-89.6268	1	109	11	6	5	50	0
40122.3	2009-11-05 00:05:03	-0.91222	-89.6267	1	109	11	6	6	4	59
40122.3	2009-11-05 00:20:03	-0.91089	-89.628	1	109	11	6	6	20	0
40122.3	2009-11-05 00:35:03	-0.91261	-89.626	1	109	11	6	6	35	0
40122.3	2009-11-05 00:50:03	-0.91247	-89.6269	1	109	11	6	6	49	59
40122.3	2009-11-05 01:05:03	-0.91243	-89.6267	1	109	11	6	7	5	0
40122.3	2009-11-05 01:20:03	-0.9123	-89.6268	1	109	11	6	7	20	0
40122.3	2009-11-05 01:35:03	-0.91261	-89.6267	1	109	11	6	7	34	59
40122.3	2009-11-05 01:50:03	-0.91254	-89.6269	1	109	11	6	7	50	0
40122.3	2009-11-05 02:05:03	-0.91265	-89.627	1	109	11	6	8	5	0
40122.3	2009-11-05 02:20:03	-0.91113	-89.6289	1	109	11	6	8	19	59
40122.4	2009-11-05 02:35:03	-0.91261	-89.6264	1	109	11	6	8	35	0
40122.4	2009-11-05 02:50:03	-0.91275	-89.627	1	109	11	6	8	50	0
40122.4	2009-11-05 03:05:03	-0.91294	-89.6265	1	109	11	6	9	4	59
40122.4	2009-11-05 03:20:03	-0.91226	-89.6264	1	109	11	6	9	20	0
40122.4	2009-11-05 03:50:03	-0.91304	-89.6275	1	109	11	6	9	49	59
40122.4	2009-11-05 04:05:03	-0.91355	-89.6264	1	109	11	6	10	5	0
40122.4	2009-11-05 04:20:03	-0.91284	-89.6271	1	109	11	6	10	20	0
40122.6	2009-11-05 08:21:03	-0.93996	-89.7202	1	109	11	6	14	21	0
40122.8	2009-11-05 13:23:12	-0.95076	-89.716	1	109	11	6	19	23	8
40122.9	2009-11-05 16:32:18	-0.95249	-89.731	1	109	11	6	22	32	14
40123	2009-11-05 17:01:04	-0.95302	-89.7342	1	109	11	6	23	1	1
40123	2009-11-05 17:54:03	-0.95341	-89.7306	1	109	11	6	23	53	59
40123.3	2009-11-06 01:58:04	-0.98722	-89.8633	1	109	11	7	7	58	1
40124.1	2009-11-06 19:47:03	-0.89694	-89.9414	1	109	11	8	1	47	0
40124.3	2009-11-07 00:09:03	-0.92724	-89.8783	1	109	11	8	6	9	0
40124.5	2009-11-07 07:05:18	-0.79047	-89.8706	1	109	11	8	13	5	14
40125	2009-11-07 18:45:03	-0.77825	-89.9696	1	109	11	9	0	45	0
40125.1	2009-11-07 20:00:03	-0.81227	-90.0326	1	109	11	9	1	59	59
40125.1	2009-11-07 20:15:03	-0.81237	-90.0323	1	109	11	9	2	15	0
40125.1	2009-11-07 20:30:03	-0.81302	-90.0321	1	109	11	9	2	30	0
40125.1	2009-11-07 20:45:03	-0.8118	-90.0321	1	109	11	9	2	44	59
40125.1	2009-11-07 21:00:03	-0.81242	-90.0322	1	109	11	9	3	0	0
40125.1	2009-11-07 21:15:03	-0.81309	-90.0318	1	109	11	9	3	15	0
40125.1	2009-11-07 21:30:03	-0.811	-90.0324	1	109	11	9	3	29	59
40125.2	2009-11-07 21:45:03	-0.81207	-90.0323	1	109	11	9	3	45	0
40125.2	2009-11-07 22:00:03	-0.81182	-90.0323	1	109	11	9	4	0	0
40125.2	2009-11-07 22:15:03	-0.81214	-90.0325	1	109	11	9	4	14	59
40125.2	2009-11-07 22:30:03	-0.81191	-90.0321	1	109	11	9	4	30	0
40125.2	2009-11-07 22:45:03	-0.8126	-90.0326	1	109	11	9	4	45	0
40125.2	2009-11-07 23:00:03	-0.81232	-90.0321	1	109	11	9	4	59	59
40125.2	2009-11-07 23:15:03	-0.81203	-90.0321	1	109	11	9	5	15	0
40125.2	2009-11-07 23:30:03	-0.81256	-90.0326	1	109	11	9	5	30	0
40125.2	2009-11-07 23:45:03	-0.81185	-90.0321	1	109	11	9	5	44	59
40125.2	2009-11-08 00:00:03	-0.81218	-90.0324	1	109	11	9	6	0	0
40125.3	2009-11-08 00:15:03	-0.81238	-90.0324	1	109	11	9	6	15	0
40125.3	2009-11-08 00:30:03	-0.81288	-90.0323	1	109	11	9	6	29	59
40125.3	2009-11-08 00:45:03	-0.81132	-90.0318	1	109	11	9	6	45	0
40125.3	2009-11-08 01:00:03	-0.81233	-90.0322	1	109	11	9	7	0	0
40125.5	2009-11-08 05:00:03	-0.83691	-90.0085	1	109	11	9	10	59	59
40125.8	2009-11-08 12:54:03	-0.61674	-90.0045	1	109	11	9	18	54	0
40126	2009-11-08 17:46:03	-0.65143	-90.0458	1	109	11	9	23	46	0
40126.2	2009-11-08 22:06:03	-0.79937	-90.0456	1	109	11	10	4	5	59
40126.2	2009-11-08 22:21:03	-0.79923	-90.0452	1	109	11	10	4	21	0
40126.2	2009-11-08 22:36:03	-0.79848	-90.0456	1	109	11	10	4	36	0
40126.2	2009-11-08 23:51:03	-0.79972	-90.0461	1	109	11	10	5	51	0
40126.3	2009-11-09 00:06:03	-0.79972	-90.0455	1	109	11	10	6	6	0
40126.3	2009-11-09 00:21:03	-0.79992	-90.0457	1	109	11	10	6	20	59
40126.3	2009-11-09 00:36:03	-0.79859	-90.0452	1	109	11	10	6	36	0
40126.3	2009-11-09 00:51:03	-0.80011	-90.0461	1	109	11	10	6	51	0
40126.3	2009-11-09 02:21:03	-0.79961	-90.0455	1	109	11	10	8	21	0
40126.4	2009-11-09 02:36:03	-0.79896	-90.0456	1	109	11	10	8	35	59
40126.4	2009-11-09 03:36:03	-0.79732	-90.0473	1	109	11	10	9	36	0
40126.4	2009-11-09 04:21:03	-0.79957	-90.0455	1	109	11	10	10	21	0
40126.6	2009-11-09 07:30:04	-0.70905	-89.9627	1	109	11	10	13	30	0
40126.6	2009-11-09 09:18:49	-0.6588	-90.0002	1	109	11	10	15	18	45
40126.9	2009-11-09 15:20:03	-0.60613	-90.0112	1	109	11	10	21	20	0
40127.1	2009-11-09 20:25:03	-0.57919	-90.1616	1	109	11	11	2	24	59
40127.1	2009-11-09 20:40:03	-0.5792	-90.1616	1	109	11	11	2	39	59
40127.1	2009-11-09 20:55:03	-0.5793	-90.1616	1	109	11	11	2	55	0
40127.1	2009-11-09 21:10:03	-0.57943	-90.1614	1	109	11	11	3	9	59
40127.1	2009-11-09 21:25:03	-0.57943	-90.1612	1	109	11	11	3	24	59
40127.2	2009-11-09 21:40:03	-0.57853	-90.1617	1	109	11	11	3	40	0
40127.2	2009-11-09 21:55:03	-0.5791	-90.1617	1	109	11	11	3	54	59
40127.2	2009-11-09 22:10:03	-0.57932	-90.1615	1	109	11	11	4	9	59
40127.2	2009-11-09 22:25:03	-0.57829	-90.1615	1	109	11	11	4	25	0
40127.2	2009-11-09 22:40:03	-0.57965	-90.1618	1	109	11	11	4	39	59
40127.2	2009-11-09 22:55:03	-0.57891	-90.1613	1	109	11	11	4	54	59
40127.2	2009-11-09 23:10:03	-0.57947	-90.1613	1	109	11	11	5	10	0
40127.2	2009-11-09 23:25:03	-0.57869	-90.1614	1	109	11	11	5	24	59
40127.2	2009-11-09 23:40:03	-0.57969	-90.1615	1	109	11	11	5	39	59
40127.3	2009-11-10 00:25:03	-0.57892	-90.1612	1	109	11	11	6	24	59
40127.3	2009-11-10 00:55:03	-0.57941	-90.1614	1	109	11	11	6	54	59
40127.3	2009-11-10 01:55:03	-0.58002	-90.1615	1	109	11	11	7	54	59
40127.4	2009-11-10 02:25:03	-0.57941	-90.1609	1	109	11	11	8	24	59
40127.4	2009-11-10 02:40:03	-0.57925	-90.1612	1	109	11	11	8	39	59
40127.4	2009-11-10 02:55:03	-0.57941	-90.1616	1	109	11	11	8	55	0
40127.4	2009-11-10 03:10:03	-0.57931	-90.1618	1	109	11	11	9	9	59
40127.4	2009-11-10 03:25:03	-0.57994	-90.162	1	109	11	11	9	24	59
40127.4	2009-11-10 03:40:03	-0.57956	-90.1617	1	109	11	11	9	40	0
40127.4	2009-11-10 03:55:03	-0.57989	-90.162	1	109	11	11	9	54	59
40127.6	2009-11-10 09:15:51	-0.61821	-90.0017	1	109	11	11	15	15	47
40127.7	2009-11-10 09:49:05	-0.61759	-90.0023	1	109	11	11	15	49	1
40127.7	2009-11-10 11:24:22	-0.62903	-89.9948	1	109	11	11	17	24	19
40128.2	2009-11-10 22:34:06	-0.87358	-89.8172	1	109	11	12	4	34	2
40128.2	2009-11-10 23:06:24	-0.87394	-89.8085	1	109	11	12	5	6	20
40128.3	2009-11-11 00:05:15	-0.8708	-89.7904	1	109	11	12	6	5	11

## Sheet: SCF06_GPS_filtered
40115.9	2009-10-29 15:35:03	-0.89489	-89.6105	1	109	10	30	21	35	0
40115.9	2009-10-29 15:50:03	-0.8945	-89.6102	1	109	10	30	21	49	59
40115.9	2009-10-29 16:05:03	-0.89452	-89.6102	1	109	10	30	22	5	0
40115.9	2009-10-29 16:35:03	-0.87508	-89.5791	1	109	10	30	22	34	59
40116	2009-10-29 17:20:03	-0.89468	-89.61	1	109	10	30	23	19	59
40116	2009-10-29 17:35:03	-0.8945	-89.6101	1	109	10	30	23	35	0
40116	2009-10-29 17:50:03	-0.89479	-89.6103	1	109	10	30	23	50	0
40116	2009-10-29 18:05:03	-0.89452	-89.6101	1	109	10	31	0	4	59
40116	2009-10-29 18:20:03	-0.89451	-89.6102	1	109	10	31	0	20	0
40116	2009-10-29 18:35:03	-0.89476	-89.6103	1	109	10	31	0	35	0
40116	2009-10-29 18:50:03	-0.89461	-89.6104	1	109	10	31	0	49	59
40116	2009-10-29 19:05:03	-0.89463	-89.6096	1	109	10	31	1	5	0
40116.1	2009-10-29 19:20:03	-0.89473	-89.6102	1	109	10	31	1	20	0
40116.1	2009-10-29 19:35:03	-0.89502	-89.6107	1	109	10	31	1	34	59
40116.1	2009-10-29 19:50:03	-0.89445	-89.6101	1	109	10	31	1	50	0
40116.1	2009-10-29 20:05:03	-0.89463	-89.6104	1	109	10	31	2	5	0
40116.1	2009-10-29 20:20:03	-0.89449	-89.6103	1	109	10	31	2	19	59
40116.1	2009-10-29 20:35:03	-0.89437	-89.6102	1	109	10	31	2	35	0
40116.1	2009-10-29 20:50:03	-0.89434	-89.6103	1	109	10	31	2	50	0
40116.1	2009-10-29 21:05:03	-0.89419	-89.6102	1	109	10	31	3	4	59
40116.1	2009-10-29 21:20:03	-0.89451	-89.6104	1	109	10	31	3	20	0
40116.1	2009-10-29 21:35:03	-0.89475	-89.6101	1	109	10	31	3	35	0
40116.2	2009-10-29 21:50:03	-0.89459	-89.6104	1	109	10	31	3	49	59
40116.2	2009-10-29 22:05:03	-0.89447	-89.6103	1	109	10	31	4	5	0
40116.2	2009-10-29 22:20:03	-0.8946	-89.6103	1	109	10	31	4	20	0
40116.2	2009-10-29 22:35:03	-0.89475	-89.6103	1	109	10	31	4	34	59
40116.2	2009-10-29 22:50:03	-0.89476	-89.6103	1	109	10	31	4	50	0
40116.2	2009-10-29 23:05:03	-0.8945	-89.6101	1	109	10	31	5	5	0
40116.2	2009-10-29 23:20:03	-0.8946	-89.6101	1	109	10	31	5	19	59
40116.2	2009-10-29 23:35:03	-0.89461	-89.61	1	109	10	31	5	35	0
40116.2	2009-10-29 23:50:03	-0.89454	-89.6102	1	109	10	31	5	50	0
40116.3	2009-10-30 00:05:03	-0.89483	-89.6101	1	109	10	31	6	4	59
40116.3	2009-10-30 00:20:03	-0.89455	-89.6103	1	109	10	31	6	20	0
40116.3	2009-10-30 00:35:03	-0.89468	-89.6102	1	109	10	31	6	35	0
40116.3	2009-10-30 00:50:03	-0.89446	-89.6105	1	109	10	31	6	49	59
40116.3	2009-10-30 01:05:03	-0.89467	-89.6101	1	109	10	31	7	5	0
40116.3	2009-10-30 01:20:03	-0.89491	-89.6102	1	109	10	31	7	20	0
40116.3	2009-10-30 01:35:03	-0.89458	-89.6102	1	109	10	31	7	34	59
40116.3	2009-10-30 01:50:03	-0.89469	-89.6104	1	109	10	31	7	50	0
40116.3	2009-10-30 02:05:03	-0.89434	-89.6091	1	109	10	31	8	5	0
40116.3	2009-10-30 02:20:03	-0.89526	-89.6097	1	109	10	31	8	19	59
40116.4	2009-10-30 02:35:03	-0.89573	-89.6102	1	109	10	31	8	35	0
40116.4	2009-10-30 02:50:03	-0.89607	-89.6106	1	109	10	31	8	50	0
40116.4	2009-10-30 03:05:03	-0.89655	-89.6099	1	109	10	31	9	4	59
40116.4	2009-10-30 04:20:03	-0.8954	-89.6095	1	109	10	31	10	20	0
40116.4	2009-10-30 04:35:03	-0.89494	-89.6094	1	109	10	31	10	34	59
40116.5	2009-10-30 04:50:03	-0.89637	-89.6107	1	109	10	31	10	50	0
40116.5	2009-10-30 05:05:03	-0.89492	-89.6096	1	109	10	31	11	5	0
40116.5	2009-10-30 06:05:03	-0.89509	-89.6098	1	109	10	31	12	4	59
40116.5	2009-10-30 06:20:03	-0.89543	-89.6096	1	109	10	31	12	20	0
40116.5	2009-10-30 06:35:03	-0.89549	-89.6092	1	109	10	31	12	35	0
40116.5	2009-10-30 06:50:03	-0.89531	-89.609	1	109	10	31	12	49	59
40116.5	2009-10-30 07:05:03	-0.89485	-89.606	1	109	10	31	13	5	0
40116.6	2009-10-30 07:20:03	-0.89529	-89.6089	1	109	10	31	13	20	0
40116.6	2009-10-30 07:35:03	-0.89509	-89.6095	1	109	10	31	13	34	59
40116.6	2009-10-30 07:50:03	-0.89519	-89.6092	1	109	10	31	13	50	0
40116.6	2009-10-30 08:05:03	-0.89496	-89.6089	1	109	10	31	14	5	0
40116.6	2009-10-30 08:20:03	-0.89504	-89.6096	1	109	10	31	14	19	59
40116.6	2009-10-30 08:35:03	-0.89501	-89.6095	1	109	10	31	14	35	0
40116.6	2009-10-30 08:50:03	-0.8952	-89.6099	1	109	10	31	14	50	0
40116.6	2009-10-30 09:35:03	-0.90717	-89.6014	1	109	10	31	15	35	0
40116.7	2009-10-30 09:50:03	-0.89542	-89.6105	1	109	10	31	15	49	59
40116.7	2009-10-30 10:05:03	-0.89539	-89.6095	1	109	10	31	16	5	0
40116.7	2009-10-30 11:20:03	-0.89535	-89.6087	1	109	10	31	17	19	59
40116.7	2009-10-30 11:35:03	-0.89596	-89.6112	1	109	10	31	17	35	0
40116.7	2009-10-30 11:50:03	-0.89548	-89.6098	1	109	10	31	17	50	0
40116.8	2009-10-30 12:05:03	-0.89526	-89.6094	1	109	10	31	18	4	59
40116.8	2009-10-30 12:20:03	-0.8954	-89.6093	1	109	10	31	18	20	0
40116.8	2009-10-30 12:35:03	-0.8954	-89.6091	1	109	10	31	18	35	0
40116.8	2009-10-30 12:50:03	-0.89516	-89.6097	1	109	10	31	18	49	59
40116.8	2009-10-30 13:05:03	-0.89533	-89.6097	1	109	10	31	19	5	0
40116.8	2009-10-30 13:20:03	-0.89512	-89.6092	1	109	10	31	19	20	0
40116.8	2009-10-30 13:35:03	-0.89546	-89.6095	1	109	10	31	19	34	59
40116.8	2009-10-30 13:50:03	-0.89527	-89.6095	1	109	10	31	19	50	0
40116.8	2009-10-30 14:05:03	-0.89538	-89.6094	1	109	10	31	20	5	0
40116.8	2009-10-30 14:20:03	-0.89541	-89.6099	1	109	10	31	20	19	59
40116.9	2009-10-30 14:35:03	-0.89519	-89.6092	1	109	10	31	20	35	0
40116.9	2009-10-30 14:50:03	-0.89548	-89.6099	1	109	10	31	20	50	0
40117	2009-10-30 18:20:03	-0.89526	-89.6095	1	109	11	1	0	20	0
40117.1	2009-10-30 21:20:03	-0.89546	-89.6094	1	109	11	1	3	20	0
40117.1	2009-10-30 21:35:03	-0.89548	-89.6093	1	109	11	1	3	35	0
40117.2	2009-10-30 21:50:03	-0.89502	-89.6096	1	109	11	1	3	49	59
40117.2	2009-10-30 22:05:03	-0.89514	-89.6095	1	109	11	1	4	5	0
40117.2	2009-10-30 22:20:03	-0.89538	-89.6096	1	109	11	1	4	20	0
40117.2	2009-10-30 22:35:03	-0.89519	-89.6098	1	109	11	1	4	34	59
40117.2	2009-10-30 22:50:03	-0.89509	-89.6093	1	109	11	1	4	50	0
40117.2	2009-10-30 23:05:03	-0.89539	-89.609	1	109	11	1	5	5	0
40117.2	2009-10-30 23:20:03	-0.89528	-89.6094	1	109	11	1	5	19	59
40117.2	2009-10-30 23:35:03	-0.8944	-89.6092	1	109	11	1	5	35	0
40117.2	2009-10-30 23:50:03	-0.89517	-89.6096	1	109	11	1	5	50	0
40117.3	2009-10-31 00:05:03	-0.89513	-89.6095	1	109	11	1	6	4	59
40117.3	2009-10-31 00:20:03	-0.89535	-89.6094	1	109	11	1	6	20	0
40117.4	2009-10-31 02:35:03	-0.89602	-89.6103	1	109	11	1	8	35	0
40117.4	2009-10-31 02:50:03	-0.89472	-89.6095	1	109	11	1	8	50	0
40117.4	2009-10-31 03:35:03	-0.89642	-89.6129	1	109	11	1	9	35	0
40117.4	2009-10-31 03:50:03	-0.8952	-89.6094	1	109	11	1	9	49	59
40117.4	2009-10-31 04:20:03	-0.89521	-89.6093	1	109	11	1	10	20	0
40117.4	2009-10-31 04:35:03	-0.89381	-89.6081	1	109	11	1	10	34	59
40117.5	2009-10-31 04:50:03	-0.90095	-89.6139	1	109	11	1	10	50	0
40117.5	2009-10-31 05:05:03	-0.89601	-89.6099	1	109	11	1	11	5	0
40117.5	2009-10-31 05:20:03	-0.89518	-89.6099	1	109	11	1	11	19	59
40117.5	2009-10-31 05:35:03	-0.89582	-89.6094	1	109	11	1	11	35	0
40117.5	2009-10-31 05:50:03	-0.89529	-89.6097	1	109	11	1	11	50	0
40117.5	2009-10-31 06:05:03	-0.89543	-89.6098	1	109	11	1	12	4	59
40117.5	2009-10-31 06:20:03	-0.89543	-89.6096	1	109	11	1	12	20	0
40117.5	2009-10-31 06:35:03	-0.8952	-89.6095	1	109	11	1	12	35	0
40117.5	2009-10-31 06:50:03	-0.89558	-89.6095	1	109	11	1	12	49	59
40117.5	2009-10-31 07:05:03	-0.89519	-89.6098	1	109	11	1	13	5	0
40117.6	2009-10-31 07:20:03	-0.90069	-89.6177	1	109	11	1	13	20	0
40117.6	2009-10-31 07:35:03	-0.89526	-89.6091	1	109	11	1	13	34	59
40117.6	2009-10-31 07:50:03	-0.8945	-89.6124	1	109	11	1	13	50	0
40117.6	2009-10-31 08:05:03	-0.89629	-89.6118	1	109	11	1	14	5	0
40117.6	2009-10-31 08:20:03	-0.89527	-89.6096	1	109	11	1	14	19	59
40118	2009-10-31 17:50:29	-0.48689	-89.5819	1	109	11	1	23	50	26
40118.1	2009-10-31 19:51:10	-0.64529	-89.6097	1	109	11	2	1	51	6
40118.2	2009-10-31 22:14:09	-0.46174	-89.6026	1	109	11	2	4	14	6
40118.4	2009-11-01 03:27:03	-0.55817	-89.5847	1	109	11	2	9	27	0
40118.5	2009-11-01 05:14:03	-0.55699	-89.5803	1	109	11	2	11	14	0
40118.6	2009-11-01 09:15:06	-0.54214	-89.5831	1	109	11	2	15	15	2
40118.7	2009-11-01 10:12:12	-0.50083	-89.5813	1	109	11	2	16	12	8
40118.8	2009-11-01 13:37:03	-0.44149	-89.6331	1	109	11	2	19	36	59
40118.9	2009-11-01 15:45:04	-0.43484	-89.6337	1	109	11	2	21	45	0
40119	2009-11-01 18:34:19	-0.46548	-89.6208	1	109	11	3	0	34	16
40119.1	2009-11-01 19:46:03	-0.4618	-89.6244	1	109	11	3	1	45	59
40119.1	2009-11-01 20:16:36	-0.45856	-89.6256	1	109	11	3	2	16	33
40119.2	2009-11-01 21:42:03	-0.44468	-89.6273	1	109	11	3	3	42	0
40119.2	2009-11-01 22:25:42	-0.43567	-89.6279	1	109	11	3	4	25	39
40119.3	2009-11-02 00:07:05	-0.45428	-89.6132	1	109	11	3	6	7	1
40119.5	2009-11-02 05:21:06	-0.44579	-89.6242	1	109	11	3	11	21	2
40119.6	2009-11-02 08:21:55	-0.42462	-89.6202	1	109	11	3	14	21	52
40119.7	2009-11-02 09:42:08	-0.44374	-89.6295	1	109	11	3	15	42	4
40119.7	2009-11-02 10:11:03	-0.44907	-89.6276	1	109	11	3	16	11	0
40119.8	2009-11-02 12:15:14	-0.44641	-89.6282	1	109	11	3	18	15	10
40119.8	2009-11-02 12:30:03	-0.43963	-89.6312	1	109	11	3	18	29	59
40119.8	2009-11-02 13:42:57	-0.43289	-89.6329	1	109	11	3	19	42	54
40119.9	2009-11-02 14:42:04	-0.43656	-89.6227	1	109	11	3	20	42	0
40119.9	2009-11-02 15:11:10	-0.45907	-89.6055	1	109	11	3	21	11	7
40120	2009-11-02 18:17:24	-0.63172	-89.5501	1	109	11	4	0	17	21
40120.1	2009-11-02 19:17:26	-0.69005	-89.5571	1	109	11	4	1	17	23
40120.2	2009-11-02 23:50:03	-0.89555	-89.6095	1	109	11	4	5	50	0
40120.3	2009-11-03 00:05:03	-0.89563	-89.6094	1	109	11	4	6	4	59
40120.3	2009-11-03 00:20:03	-0.89433	-89.6098	1	109	11	4	6	20	0
40120.3	2009-11-03 00:35:03	-0.89557	-89.6093	1	109	11	4	6	35	0
40120.3	2009-11-03 00:50:03	-0.89566	-89.6093	1	109	11	4	6	49	59
40120.3	2009-11-03 02:05:03	-0.89502	-89.6093	1	109	11	4	8	5	0
40120.4	2009-11-03 02:35:03	-0.89549	-89.6094	1	109	11	4	8	35	0
40120.4	2009-11-03 02:50:03	-0.89512	-89.6098	1	109	11	4	8	50	0
40120.4	2009-11-03 03:05:03	-0.89546	-89.6093	1	109	11	4	9	4	59
40120.4	2009-11-03 03:20:03	-0.89557	-89.6108	1	109	11	4	9	20	0
40120.4	2009-11-03 03:35:03	-0.8959	-89.6114	1	109	11	4	9	35	0
40120.5	2009-11-03 05:35:03	-0.89553	-89.6097	1	109	11	4	11	35	0
40120.5	2009-11-03 05:50:03	-0.89536	-89.6093	1	109	11	4	11	50	0
40120.5	2009-11-03 06:20:03	-0.89491	-89.6098	1	109	11	4	12	20	0
40120.5	2009-11-03 06:35:03	-0.89499	-89.61	1	109	11	4	12	35	0
40120.5	2009-11-03 06:50:03	-0.89539	-89.6094	1	109	11	4	12	49	59
40120.6	2009-11-03 07:20:03	-0.89606	-89.6106	1	109	11	4	13	20	0
40120.6	2009-11-03 07:35:03	-0.89512	-89.6088	1	109	11	4	13	34	59
40120.6	2009-11-03 07:50:03	-0.89498	-89.6092	1	109	11	4	13	50	0
40120.6	2009-11-03 08:05:03	-0.89499	-89.6087	1	109	11	4	14	5	0
40120.6	2009-11-03 08:20:03	-0.89487	-89.6095	1	109	11	4	14	19	59
40120.6	2009-11-03 08:35:03	-0.89538	-89.6096	1	109	11	4	14	35	0
40120.6	2009-11-03 09:05:03	-0.89484	-89.6095	1	109	11	4	15	4	59

## Sheet: SCF07_GPS_filtered
40115.9	2009-10-29 16:45:03	-0.89546	-89.6097	1	109	10	30	22	45	0
40116	2009-10-29 17:30:03	-0.8958	-89.6094	1	109	10	30	23	30	0
40116	2009-10-29 18:15:03	-0.89378	-89.6114	1	109	10	31	0	15	0
40116	2009-10-29 18:45:03	-0.89282	-89.6109	1	109	10	31	0	45	0
40116.1	2009-10-29 19:45:03	-0.89543	-89.6098	1	109	10	31	1	45	0
40116.1	2009-10-29 20:00:03	-0.89565	-89.6098	1	109	10	31	1	59	59
40116.1	2009-10-29 20:30:03	-0.89521	-89.6091	1	109	10	31	2	30	0
40116.1	2009-10-29 20:45:03	-0.89379	-89.6169	1	109	10	31	2	44	59
40116.1	2009-10-29 21:00:03	-0.89524	-89.6102	1	109	10	31	3	0	0
40116.1	2009-10-29 21:15:03	-0.89507	-89.6092	1	109	10	31	3	15	0
40116.2	2009-10-29 21:45:03	-0.89526	-89.6095	1	109	10	31	3	45	0
40116.2	2009-10-29 22:00:03	-0.89537	-89.6097	1	109	10	31	4	0	0
40116.2	2009-10-29 22:15:03	-0.89514	-89.6096	1	109	10	31	4	14	59
40116.2	2009-10-29 23:00:03	-0.89658	-89.6101	1	109	10	31	4	59	59
40116.3	2009-10-30 00:30:03	-0.9212	-89.5978	1	109	10	31	6	29	59
40116.3	2009-10-30 01:00:03	-0.91707	-89.5899	1	109	10	31	7	0	0
40116.3	2009-10-30 01:45:03	-0.89474	-89.6091	1	109	10	31	7	45	0
40116.5	2009-10-30 06:30:03	-0.89238	-89.6118	1	109	10	31	12	29	59
40116.5	2009-10-30 06:45:03	-0.89423	-89.6108	1	109	10	31	12	45	0
40116.5	2009-10-30 07:00:03	-0.89127	-89.6139	1	109	10	31	13	0	0
40116.6	2009-10-30 07:30:03	-0.89534	-89.6095	1	109	10	31	13	30	0
40116.6	2009-10-30 09:00:03	-0.89408	-89.6096	1	109	10	31	15	0	0
40116.7	2009-10-30 10:45:03	-0.89416	-89.6098	1	109	10	31	16	45	0
40116.7	2009-10-30 11:15:03	-0.89489	-89.6105	1	109	10	31	17	15	0
40116.8	2009-10-30 12:00:03	-0.89716	-89.6162	1	109	10	31	18	0	0
40116.8	2009-10-30 12:15:03	-0.89443	-89.6096	1	109	10	31	18	15	0
40116.8	2009-10-30 13:15:03	-0.89885	-89.6093	1	109	10	31	19	14	59
40116.8	2009-10-30 13:45:03	-0.89465	-89.6107	1	109	10	31	19	45	0
40116.8	2009-10-30 14:15:03	-0.89462	-89.6099	1	109	10	31	20	15	0
40116.9	2009-10-30 14:45:03	-0.89447	-89.6096	1	109	10	31	20	44	59
40116.9	2009-10-30 15:15:03	-0.89399	-89.6287	1	109	10	31	21	15	0
40116.9	2009-10-30 15:45:03	-0.89453	-89.6104	1	109	10	31	21	45	0
40116.9	2009-10-30 16:00:03	-0.89428	-89.6103	1	109	10	31	22	0	0
40116.9	2009-10-30 16:15:03	-0.89427	-89.6106	1	109	10	31	22	14	59
40116.9	2009-10-30 16:30:03	-0.89468	-89.6105	1	109	10	31	22	30	0
40117	2009-10-30 17:15:03	-0.89196	-89.6124	1	109	10	31	23	15	0
40117	2009-10-30 18:00:03	-0.89416	-89.6111	1	109	11	1	0	0	0
40117	2009-10-30 19:00:03	-0.90197	-89.6002	1	109	11	1	1	0	0
40117.1	2009-10-30 21:30:03	-0.89491	-89.61	1	109	11	1	3	29	59
40117.2	2009-10-30 21:45:03	-0.89525	-89.6096	1	109	11	1	3	45	0
40117.2	2009-10-30 22:00:03	-0.89797	-89.6097	1	109	11	1	4	0	0
40117.2	2009-10-30 22:45:03	-0.8944	-89.6096	1	109	11	1	4	45	0
40117.3	2009-10-31 01:45:03	-0.89434	-89.6098	1	109	11	1	7	45	0
40117.3	2009-10-31 02:00:03	-0.89413	-89.6096	1	109	11	1	7	59	59
40117.6	2009-10-31 07:30:03	-0.89454	-89.6099	1	109	11	1	13	30	0
40117.6	2009-10-31 09:15:03	-0.89461	-89.61	1	109	11	1	15	15	0
40117.7	2009-10-31 11:15:03	-0.8947	-89.6099	1	109	11	1	17	15	0
40117.7	2009-10-31 11:45:03	-0.89533	-89.6117	1	109	11	1	17	44	59
40118	2009-10-31 18:55:00	-0.56152	-89.5808	1	109	11	2	0	54	57
40118.1	2009-10-31 19:44:16	-0.53694	-89.5702	1	109	11	2	1	44	12
40118.2	2009-10-31 21:39:04	-0.48653	-89.5684	1	109	11	2	3	39	0
40118.3	2009-11-01 00:37:37	-0.48696	-89.5774	1	109	11	2	6	37	34
40118.8	2009-11-01 13:36:03	-0.44115	-89.6334	1	109	11	2	19	36	0
40119.7	2009-11-02 10:07:03	-0.44921	-89.6265	1	109	11	3	16	7	0
40120.1	2009-11-02 21:13:03	-0.8947	-89.6104	1	109	11	4	3	13	0
40120.2	2009-11-02 21:43:03	-0.89457	-89.6103	1	109	11	4	3	42	59
40120.2	2009-11-02 23:28:03	-0.89689	-89.6148	1	109	11	4	5	28	0
40120.2	2009-11-02 23:43:03	-0.89357	-89.6087	1	109	11	4	5	42	59
40120.6	2009-11-03 08:43:03	-0.89435	-89.6102	1	109	11	4	14	42	59
40120.6	2009-11-03 08:58:03	-0.89432	-89.6104	1	109	11	4	14	57	59

## Sheet: SCF08_GPS_filtered
40116.7	2009-10-30 09:38:03	-0.902	-89.6126	1	109	10	31	15	38	0
40116.7	2009-10-30 09:53:03	-0.9017	-89.6124	1	109	10	31	15	53	0
40116.7	2009-10-30 10:23:03	-0.90221	-89.6122	1	109	10	31	16	23	0
40116.7	2009-10-30 11:37:03	-0.90204	-89.6128	1	109	10	31	17	37	0
40116.8	2009-10-30 12:07:03	-0.90242	-89.6136	1	109	10	31	18	6	59
40116.8	2009-10-30 12:22:03	-0.90207	-89.6149	1	109	10	31	18	22	0
40116.8	2009-10-30 12:37:03	-0.90197	-89.6092	1	109	10	31	18	36	59
40116.8	2009-10-30 12:52:03	-0.90211	-89.612	1	109	10	31	18	51	59
40116.8	2009-10-30 13:07:03	-0.90162	-89.6123	1	109	10	31	19	7	0
40116.8	2009-10-30 13:22:03	-0.90171	-89.6124	1	109	10	31	19	21	59
40116.8	2009-10-30 13:52:03	-0.90152	-89.6122	1	109	10	31	19	52	0
40116.8	2009-10-30 14:07:03	-0.90232	-89.6124	1	109	10	31	20	6	59
40116.8	2009-10-30 14:22:03	-0.90209	-89.6127	1	109	10	31	20	21	59
40116.9	2009-10-30 14:37:03	-0.90193	-89.6124	1	109	10	31	20	37	0
40116.9	2009-10-30 14:52:03	-0.90183	-89.6123	1	109	10	31	20	51	59
40116.9	2009-10-30 15:07:03	-0.90185	-89.6125	1	109	10	31	21	6	59
40116.9	2009-10-30 15:22:03	-0.90198	-89.6122	1	109	10	31	21	22	0
40116.9	2009-10-30 15:37:03	-0.90213	-89.6129	1	109	10	31	21	36	59
40116.9	2009-10-30 15:52:03	-0.90213	-89.6126	1	109	10	31	21	51	59
40116.9	2009-10-30 16:07:03	-0.90225	-89.613	1	109	10	31	22	7	0
40116.9	2009-10-30 16:22:03	-0.9018	-89.6124	1	109	10	31	22	21	59
40116.9	2009-10-30 16:37:03	-0.90191	-89.6127	1	109	10	31	22	36	59
40117	2009-10-30 16:52:03	-0.90195	-89.6125	1	109	10	31	22	52	0
40117	2009-10-30 17:07:03	-0.9017	-89.6123	1	109	10	31	23	6	59
40117	2009-10-30 17:22:03	-0.90199	-89.6123	1	109	10	31	23	21	59
40117	2009-10-30 17:37:03	-0.90178	-89.6123	1	109	10	31	23	37	0
40117	2009-10-30 17:52:03	-0.90194	-89.6124	1	109	10	31	23	51	59
40117	2009-10-30 18:07:03	-0.90203	-89.6122	1	109	11	1	0	6	59
40117	2009-10-30 18:22:03	-0.90187	-89.6123	1	109	11	1	0	22	0
40117	2009-10-30 18:37:03	-0.90184	-89.6122	1	109	11	1	0	36	59
40117	2009-10-30 18:52:03	-0.90185	-89.6123	1	109	11	1	0	51	59
40117	2009-10-30 19:07:03	-0.90184	-89.6124	1	109	11	1	1	7	0
40117.1	2009-10-30 19:22:03	-0.90194	-89.6122	1	109	11	1	1	21	59
40117.1	2009-10-30 19:37:03	-0.90223	-89.6124	1	109	11	1	1	36	59
40117.1	2009-10-30 19:52:03	-0.90187	-89.6122	1	109	11	1	1	52	0
40117.1	2009-10-30 20:07:03	-0.90224	-89.6125	1	109	11	1	2	6	59
40117.1	2009-10-30 20:22:03	-0.90195	-89.6121	1	109	11	1	2	21	59
40117.1	2009-10-30 20:37:03	-0.9018	-89.6124	1	109	11	1	2	37	0
40117.1	2009-10-30 20:52:03	-0.90202	-89.6119	1	109	11	1	2	51	59
40117.1	2009-10-30 21:07:03	-0.90149	-89.6127	1	109	11	1	3	6	59
40117.1	2009-10-30 21:22:03	-0.90163	-89.6125	1	109	11	1	3	22	0
40117.2	2009-10-30 21:52:03	-0.90193	-89.6121	1	109	11	1	3	51	59
40117.2	2009-10-30 22:07:03	-0.90248	-89.6115	1	109	11	1	4	7	0
40117.2	2009-10-30 22:22:03	-0.90171	-89.6123	1	109	11	1	4	21	59
40117.2	2009-10-30 22:37:03	-0.90193	-89.612	1	109	11	1	4	36	59
40117.2	2009-10-30 22:52:03	-0.90209	-89.6119	1	109	11	1	4	52	0
40117.2	2009-10-30 23:07:03	-0.90153	-89.6128	1	109	11	1	5	6	59
40117.2	2009-10-30 23:22:03	-0.90195	-89.6123	1	109	11	1	5	21	59
40117.2	2009-10-30 23:37:03	-0.90168	-89.6126	1	109	11	1	5	37	0
40117.2	2009-10-30 23:52:03	-0.9017	-89.6127	1	109	11	1	5	51	59
40117.3	2009-10-31 00:07:03	-0.90187	-89.6127	1	109	11	1	6	6	59
40117.3	2009-10-31 00:22:03	-0.90187	-89.6124	1	109	11	1	6	22	0
40117.3	2009-10-31 00:37:03	-0.90196	-89.6124	1	109	11	1	6	36	59
40117.3	2009-10-31 00:52:03	-0.90211	-89.6122	1	109	11	1	6	51	59
40117.3	2009-10-31 01:07:03	-0.90247	-89.6129	1	109	11	1	7	7	0
40117.3	2009-10-31 01:22:03	-0.90195	-89.6123	1	109	11	1	7	21	59
40117.3	2009-10-31 01:37:03	-0.90188	-89.6124	1	109	11	1	7	36	59
40117.4	2009-10-31 03:22:03	-0.90157	-89.611	1	109	11	1	9	22	0
40117.4	2009-10-31 03:37:03	-0.90197	-89.6125	1	109	11	1	9	36	59
40117.4	2009-10-31 03:52:03	-0.90196	-89.6117	1	109	11	1	9	51	59
40117.4	2009-10-31 04:07:03	-0.9017	-89.6117	1	109	11	1	10	7	0
40117.5	2009-10-31 06:37:03	-0.90199	-89.6123	1	109	11	1	12	36	59
40117.5	2009-10-31 06:52:03	-0.90206	-89.6124	1	109	11	1	12	51	59
40117.5	2009-10-31 07:07:03	-0.90192	-89.612	1	109	11	1	13	7	0
40117.6	2009-10-31 08:37:03	-0.90163	-89.6121	1	109	11	1	14	37	0
40117.6	2009-10-31 08:52:03	-0.9018	-89.6122	1	109	11	1	14	51	59
40117.7	2009-10-31 10:22:03	-0.90175	-89.6121	1	109	11	1	16	21	59
40117.7	2009-10-31 10:37:50	-0.90178	-89.6121	1	109	11	1	16	37	47
40117.7	2009-10-31 10:53:14	-0.90199	-89.6128	1	109	11	1	16	53	11
40117.7	2009-10-31 11:08:03	-0.90203	-89.6126	1	109	11	1	17	8	0
40117.8	2009-10-31 12:38:03	-0.90191	-89.6124	1	109	11	1	18	38	0
40117.8	2009-10-31 12:53:03	-0.90189	-89.6121	1	109	11	1	18	53	0
40117.8	2009-10-31 13:38:03	-0.902	-89.6125	1	109	11	1	19	38	0
40117.8	2009-10-31 13:53:03	-0.90199	-89.6125	1	109	11	1	19	52	59
40117.9	2009-10-31 14:51:03	-0.90198	-89.6127	1	109	11	1	20	51	0
40117.9	2009-10-31 15:06:03	-0.90182	-89.6119	1	109	11	1	21	6	0
40117.9	2009-10-31 15:36:03	-0.9018	-89.6127	1	109	11	1	21	36	0
40117.9	2009-10-31 15:51:03	-0.90157	-89.61	1	109	11	1	21	51	0
40118	2009-10-31 16:51:03	-0.90248	-89.6125	1	109	11	1	22	50	59
40118	2009-10-31 17:06:03	-0.90183	-89.6124	1	109	11	1	23	6	0
40118	2009-10-31 17:21:03	-0.90199	-89.6124	1	109	11	1	23	21	0
40118	2009-10-31 17:36:03	-0.90215	-89.6129	1	109	11	1	23	35	59
40118	2009-10-31 17:51:03	-0.90188	-89.6121	1	109	11	1	23	51	0
40118	2009-10-31 18:06:03	-0.90161	-89.6121	1	109	11	2	0	6	0
40118	2009-10-31 18:21:03	-0.9019	-89.612	1	109	11	2	0	20	59
40118	2009-10-31 18:36:03	-0.90187	-89.612	1	109	11	2	0	36	0
40118	2009-10-31 18:51:03	-0.90183	-89.6121	1	109	11	2	0	51	0
40118	2009-10-31 19:06:03	-0.90161	-89.612	1	109	11	2	1	5	59
40118.1	2009-10-31 19:21:03	-0.90196	-89.6148	1	109	11	2	1	21	0
40118.1	2009-10-31 19:36:03	-0.90167	-89.612	1	109	11	2	1	36	0
40118.1	2009-10-31 20:21:03	-0.90191	-89.6123	1	109	11	2	2	21	0
40118.1	2009-10-31 20:36:03	-0.90197	-89.6122	1	109	11	2	2	35	59
40118.1	2009-10-31 20:51:03	-0.9019	-89.6123	1	109	11	2	2	51	0
40118.1	2009-10-31 21:06:03	-0.90197	-89.6123	1	109	11	2	3	6	0
40118.1	2009-10-31 21:21:03	-0.90178	-89.6121	1	109	11	2	3	20	59
40118.2	2009-10-31 21:36:03	-0.90185	-89.6122	1	109	11	2	3	36	0
40118.2	2009-10-31 21:51:03	-0.90155	-89.6117	1	109	11	2	3	51	0
40118.2	2009-10-31 22:06:03	-0.90146	-89.6119	1	109	11	2	4	5	59
40118.2	2009-10-31 22:21:03	-0.90164	-89.6121	1	109	11	2	4	21	0
40118.2	2009-10-31 22:51:03	-0.90195	-89.6122	1	109	11	2	4	50	59
40118.2	2009-10-31 23:06:03	-0.9019	-89.612	1	109	11	2	5	6	0
40118.2	2009-10-31 23:21:03	-0.90194	-89.6123	1	109	11	2	5	21	0
40118.3	2009-11-01 00:36:05	-0.85405	-89.6081	1	109	11	2	6	36	1
40118.9	2009-11-01 15:30:05	-0.43717	-89.6341	1	109	11	2	21	30	2
40118.9	2009-11-01 15:45:03	-0.43452	-89.6332	1	109	11	2	21	45	0
40119.1	2009-11-01 20:09:45	-0.4624	-89.5908	1	109	11	3	2	9	42
40119.1	2009-11-01 20:25:05	-0.46102	-89.5916	1	109	11	3	2	25	2
40119.2	2009-11-01 23:16:15	-0.4702	-89.5853	1	109	11	3	5	16	11
40119.3	2009-11-02 00:30:04	-0.46736	-89.5948	1	109	11	3	6	30	0
40119.5	2009-11-02 06:39:09	-0.43753	-89.6331	1	109	11	3	12	39	5
40119.5	2009-11-02 07:08:03	-0.43568	-89.629	1	109	11	3	13	7	59
40119.6	2009-11-02 09:05:21	-0.43545	-89.6348	1	109	11	3	15	5	17
40119.7	2009-11-02 09:54:03	-0.44615	-89.6272	1	109	11	3	15	54	0
40119.7	2009-11-02 10:09:03	-0.44923	-89.6266	1	109	11	3	16	9	0
40119.7	2009-11-02 11:06:03	-0.45562	-89.6234	1	109	11	3	17	6	0
40119.7	2009-11-02 11:21:04	-0.45607	-89.6228	1	109	11	3	17	21	1
40119.7	2009-11-02 11:44:22	-0.453	-89.6209	1	109	11	3	17	44	19
40119.8	2009-11-02 12:28:03	-0.44068	-89.6309	1	109	11	3	18	27	59
40119.8	2009-11-02 12:57:03	-0.43179	-89.6295	1	109	11	3	18	56	59
40119.8	2009-11-02 14:13:03	-0.43496	-89.6275	1	109	11	3	20	12	59
40119.9	2009-11-02 14:28:05	-0.4343	-89.6235	1	109	11	3	20	28	1
40119.9	2009-11-02 14:43:03	-0.43659	-89.6225	1	109	11	3	20	42	59
40120	2009-11-02 17:06:06	-0.44889	-89.6033	1	109	11	3	23	6	2
40120	2009-11-02 18:18:10	-0.45744	-89.5988	1	109	11	4	0	18	6
40120	2009-11-02 18:33:07	-0.45901	-89.5994	1	109	11	4	0	33	3
40120	2009-11-02 18:48:20	-0.46204	-89.5988	1	109	11	4	0	48	16
40120.1	2009-11-02 21:07:17	-0.46048	-89.5716	1	109	11	4	3	7	13
40120.3	2009-11-03 00:16:17	-0.49929	-89.5292	1	109	11	4	6	16	13
40120.8	2009-11-03 12:05:03	-0.55583	-89.5812	1	109	11	4	18	4	59
40120.8	2009-11-03 12:34:04	-0.56232	-89.5897	1	109	11	4	18	34	0
40120.8	2009-11-03 13:12:03	-0.55795	-89.5828	1	109	11	4	19	12	0
40120.8	2009-11-03 13:46:03	-0.55985	-89.5842	1	109	11	4	19	45	59
40121	2009-11-03 18:33:03	-0.64393	-89.5037	1	109	11	5	0	33	0
40121.1	2009-11-03 19:32:49	-0.67975	-89.4697	1	109	11	5	1	32	45
40121.1	2009-11-03 20:59:03	-0.71461	-89.4016	1	109	11	5	2	59	0
40121.1	2009-11-03 21:14:03	-0.71488	-89.3992	1	109	11	5	3	13	59
40121.1	2009-11-03 21:29:03	-0.71497	-89.3991	1	109	11	5	3	29	0
40121.2	2009-11-03 23:44:03	-0.7151	-89.3991	1	109	11	5	5	44	0
40121.2	2009-11-03 23:59:03	-0.71516	-89.399	1	109	11	5	5	59	0
40121.3	2009-11-04 00:14:05	-0.71647	-89.4	1	109	11	5	6	14	2
40121.3	2009-11-04 00:29:03	-0.71683	-89.3996	1	109	11	5	6	29	0
40121.3	2009-11-04 00:44:03	-0.71695	-89.3996	1	109	11	5	6	44	0
40121.3	2009-11-04 00:59:03	-0.71685	-89.3996	1	109	11	5	6	58	59
40121.3	2009-11-04 01:14:03	-0.71704	-89.3997	1	109	11	5	7	14	0
40121.3	2009-11-04 01:29:03	-0.71692	-89.3996	1	109	11	5	7	29	0
40121.3	2009-11-04 01:44:03	-0.71681	-89.3998	1	109	11	5	7	43	59
40121.3	2009-11-04 01:59:03	-0.71626	-89.4008	1	109	11	5	7	59	0
40121.4	2009-11-04 02:29:03	-0.71669	-89.3992	1	109	11	5	8	28	59
40121.4	2009-11-04 02:44:03	-0.71684	-89.3996	1	109	11	5	8	44	0
40121.4	2009-11-04 02:59:03	-0.7169	-89.3997	1	109	11	5	8	59	0
40121.4	2009-11-04 03:29:03	-0.71683	-89.3997	1	109	11	5	9	29	0
40121.4	2009-11-04 03:44:03	-0.71681	-89.3999	1	109	11	5	9	44	0
40121.5	2009-11-04 06:27:29	-0.66862	-89.4031	1	109	11	5	12	27	25
40121.6	2009-11-04 07:32:06	-0.66633	-89.4194	1	109	11	5	13	32	2
40121.6	2009-11-04 08:08:03	-0.66595	-89.4191	1	109	11	5	14	8	0
40121.6	2009-11-04 09:17:07	-0.66655	-89.4172	1	109	11	5	15	17	3
40121.6	2009-11-04 09:32:03	-0.66571	-89.4188	1	109	11	5	15	31	59
40121.7	2009-11-04 11:34:05	-0.66681	-89.4153	1	109	11	5	17	34	2
40122	2009-11-04 18:01:03	-0.71678	-89.3998	1	109	11	6	0	0	59
40122	2009-11-04 18:16:03	-0.71684	-89.3998	1	109	11	6	0	15	59
40122	2009-11-04 18:31:03	-0.71665	-89.3998	1	109	11	6	0	31	0
40122	2009-11-04 18:46:03	-0.71688	-89.3997	1	109	11	6	0	45	59
40122	2009-11-04 19:01:03	-0.71675	-89.3998	1	109	11	6	1	0	59
40122.1	2009-11-04 19:16:03	-0.7163	-89.3997	1	109	11	6	1	16	0
40122.1	2009-11-04 19:31:03	-0.71668	-89.3998	1	109	11	6	1	30	59
40122.1	2009-11-04 19:46:03	-0.71695	-89.3999	1	109	11	6	1	45	59
40122.1	2009-11-04 20:46:03	-0.71666	-89.3996	1	109	11	6	2	46	0
40122.1	2009-11-04 21:01:03	-0.71668	-89.3999	1	109	11	6	3	0	59
40122.2	2009-11-04 22:31:03	-0.71676	-89.3996	1	109	11	6	4	30	59
40122.2	2009-11-04 22:46:03	-0.71684	-89.3998	1	109	11	6	4	45	59
40122.2	2009-11-04 23:31:03	-0.71704	-89.3997	1	109	11	6	5	30	59
40122.3	2009-11-05 00:16:03	-0.71672	-89.3997	1	109	11	6	6	15	59
40122.3	2009-11-05 01:16:03	-0.71701	-89.3996	1	109	11	6	7	16	0
40122.3	2009-11-05 01:31:03	-0.71644	-89.3997	1	109	11	6	7	30	59
40122.3	2009-11-05 01:46:03	-0.71683	-89.3999	1	109	11	6	7	45	59
40122.4	2009-11-05 04:31:16	-0.67111	-89.4057	1	109	11	6	10	31	12
40122.6	2009-11-05 07:15:04	-0.67213	-89.4092	1	109	11	6	13	15	0
40122.6	2009-11-05 07:51:03	-0.67333	-89.4107	1	109	11	6	13	50	59
40122.6	2009-11-05 08:06:05	-0.67163	-89.412	1	109	11	6	14	6	1
40122.6	2009-11-05 08:21:04	-0.66805	-89.413	1	109	11	6	14	21	1
40122.6	2009-11-05 09:04:04	-0.66669	-89.4094	1	109	11	6	15	4	1
40122.7	2009-11-05 09:47:03	-0.66412	-89.4096	1	109	11	6	15	47	0
40122.7	2009-11-05 10:16:03	-0.66636	-89.4149	1	109	11	6	16	16	0
40122.7	2009-11-05 10:45:07	-0.66309	-89.4173	1	109	11	6	16	45	3
40122.7	2009-11-05 11:07:24	-0.66407	-89.417	1	109	11	6	17	7	21
40122.7	2009-11-05 11:23:07	-0.66327	-89.4154	1	109	11	6	17	23	3
40122.8	2009-11-05 12:44:03	-0.66303	-89.4171	1	109	11	6	18	44	0
40122.8	2009-11-05 14:02:06	-0.68284	-89.4097	1	109	11	6	20	2	3
40122.9	2009-11-05 15:13:03	-0.71711	-89.3997	1	109	11	6	21	13	0
40122.9	2009-11-05 15:28:03	-0.7169	-89.3995	1	109	11	6	21	27	59
40122.9	2009-11-05 15:43:03	-0.71692	-89.3993	1	109	11	6	21	42	59
40122.9	2009-11-05 16:28:03	-0.71696	-89.3995	1	109	11	6	22	27	59
40122.9	2009-11-05 16:43:03	-0.71687	-89.3996	1	109	11	6	22	43	0
40123	2009-11-05 16:58:03	-0.71692	-89.3995	1	109	11	6	22	57	59
40123	2009-11-05 17:13:03	-0.71694	-89.3993	1	109	11	6	23	12	59
40123	2009-11-05 17:28:03	-0.71697	-89.3995	1	109	11	6	23	28	0
40123	2009-11-05 17:43:03	-0.71689	-89.3996	1	109	11	6	23	42	59
40123	2009-11-05 17:58:03	-0.71692	-89.3996	1	109	11	6	23	57	59
40123	2009-11-05 18:13:03	-0.71817	-89.3992	1	109	11	7	0	13	0
40123	2009-11-05 18:28:03	-0.71698	-89.3993	1	109	11	7	0	27	59
40123	2009-11-05 18:43:03	-0.71674	-89.3996	1	109	11	7	0	42	59
40123.1	2009-11-05 19:27:15	-0.71385	-89.419	1	109	11	7	1	27	12
40123.1	2009-11-05 20:38:26	-0.67647	-89.4684	1	109	11	7	2	38	23
40123.3	2009-11-06 01:37:12	-0.54721	-89.5858	1	109	11	7	7	37	9
40123.3	2009-11-06 02:09:44	-0.53488	-89.5821	1	109	11	7	8	9	41
40123.4	2009-11-06 03:25:03	-0.53402	-89.5701	1	109	11	7	9	24	59
40123.4	2009-11-06 03:40:03	-0.5346	-89.5745	1	109	11	7	9	40	0
40123.7	2009-11-06 11:48:26	-0.43372	-89.6333	1	109	11	7	17	48	22
40123.8	2009-11-06 12:32:03	-0.435	-89.6312	1	109	11	7	18	31	59
40123.8	2009-11-06 13:08:20	-0.43541	-89.6366	1	109	11	7	19	8	17
40123.8	2009-11-06 13:24:56	-0.42911	-89.6371	1	109	11	7	19	24	53
40124.2	2009-11-06 22:19:59	-0.61557	-89.605	1	109	11	8	4	19	56
40124.4	2009-11-07 04:17:03	-0.9037	-89.6146	1	109	11	8	10	16	59
40124.4	2009-11-07 04:32:03	-0.90439	-89.6179	1	109	11	8	10	32	0
40124.4	2009-11-07 04:47:03	-0.90334	-89.617	1	109	11	8	10	47	0
40124.5	2009-11-07 05:47:03	-0.90543	-89.6193	1	109	11	8	11	46	59
40124.5	2009-11-07 06:32:03	-0.90532	-89.6165	1	109	11	8	12	31	59
40124.5	2009-11-07 06:47:03	-0.89929	-89.5982	1	109	11	8	12	47	0
40124.6	2009-11-07 07:17:03	-0.89952	-89.6001	1	109	11	8	13	16	59

## Sheet: SCF09_GPS_filtered
40116.7	2009-10-30 10:46:04	-0.90169	-89.6144	1	109	10	31	16	46	0
40116.7	2009-10-30 11:01:03	-0.90192	-89.6121	1	109	10	31	17	1	0
40116.7	2009-10-30 11:16:03	-0.90192	-89.6122	1	109	10	31	17	15	59
40116.7	2009-10-30 11:31:03	-0.90203	-89.6123	1	109	10	31	17	30	59
40116.7	2009-10-30 11:46:03	-0.90208	-89.6124	1	109	10	31	17	46	0
40116.8	2009-10-30 12:01:03	-0.90207	-89.6122	1	109	10	31	18	0	59
40116.8	2009-10-30 12:16:03	-0.90206	-89.6124	1	109	10	31	18	15	59
40116.8	2009-10-30 12:31:03	-0.902	-89.6125	1	109	10	31	18	31	0
40116.8	2009-10-30 13:01:03	-0.902	-89.6128	1	109	10	31	19	0	59
40116.8	2009-10-30 13:16:03	-0.9023	-89.6125	1	109	10	31	19	16	0
40116.8	2009-10-30 13:31:03	-0.90236	-89.6119	1	109	10	31	19	30	59
40116.8	2009-10-30 13:46:03	-0.90211	-89.6123	1	109	10	31	19	45	59
40116.8	2009-10-30 14:01:03	-0.90179	-89.6124	1	109	10	31	20	1	0
40116.8	2009-10-30 14:16:03	-0.90149	-89.6119	1	109	10	31	20	15	59
40116.9	2009-10-30 14:31:03	-0.90238	-89.6126	1	109	10	31	20	30	59
40116.9	2009-10-30 15:01:03	-0.90239	-89.613	1	109	10	31	21	0	59
40116.9	2009-10-30 15:16:03	-0.9022	-89.6126	1	109	10	31	21	15	59
40116.9	2009-10-30 15:31:03	-0.90245	-89.6111	1	109	10	31	21	31	0
40116.9	2009-10-30 15:46:03	-0.90195	-89.6125	1	109	10	31	21	45	59
40116.9	2009-10-30 16:01:03	-0.90256	-89.6129	1	109	10	31	22	0	59
40116.9	2009-10-30 16:16:03	-0.90202	-89.6119	1	109	10	31	22	16	0
40116.9	2009-10-30 16:46:03	-0.90346	-89.6122	1	109	10	31	22	45	59
40117	2009-10-30 17:01:03	-0.90249	-89.6129	1	109	10	31	23	1	0
40117	2009-10-30 17:16:03	-0.90148	-89.6122	1	109	10	31	23	15	59
40117	2009-10-30 17:31:03	-0.90163	-89.6123	1	109	10	31	23	30	59
40117	2009-10-30 17:46:03	-0.90212	-89.6125	1	109	10	31	23	46	0
40117	2009-10-30 18:01:03	-0.90207	-89.6123	1	109	11	1	0	0	59
40117	2009-10-30 18:16:03	-0.90206	-89.6126	1	109	11	1	0	15	59
40117	2009-10-30 18:31:03	-0.9019	-89.6125	1	109	11	1	0	31	0
40117	2009-10-30 18:46:03	-0.90219	-89.6125	1	109	11	1	0	45	59
40117	2009-10-30 19:01:03	-0.90241	-89.6125	1	109	11	1	1	0	59
40117.1	2009-10-30 19:16:03	-0.90222	-89.6127	1	109	11	1	1	16	0
40117.1	2009-10-30 19:31:03	-0.90231	-89.6126	1	109	11	1	1	30	59
40117.1	2009-10-30 19:46:03	-0.90211	-89.6128	1	109	11	1	1	45	59
40117.1	2009-10-30 20:01:03	-0.90194	-89.6124	1	109	11	1	2	1	0
40117.1	2009-10-30 20:16:03	-0.90215	-89.6127	1	109	11	1	2	15	59
40117.1	2009-10-30 20:31:03	-0.90233	-89.613	1	109	11	1	2	30	59
40117.1	2009-10-30 20:46:03	-0.90203	-89.6125	1	109	11	1	2	46	0
40117.1	2009-10-30 21:01:03	-0.90213	-89.6128	1	109	11	1	3	0	59
40117.1	2009-10-30 21:16:03	-0.90195	-89.6128	1	109	11	1	3	15	59
40117.1	2009-10-30 21:31:03	-0.90279	-89.6126	1	109	11	1	3	31	0
40117.2	2009-10-30 21:46:03	-0.90229	-89.6127	1	109	11	1	3	45	59
40117.2	2009-10-30 22:01:03	-0.90219	-89.6127	1	109	11	1	4	0	59
40117.2	2009-10-30 22:16:03	-0.90228	-89.6128	1	109	11	1	4	16	0
40117.2	2009-10-30 22:31:03	-0.9025	-89.6129	1	109	11	1	4	30	59
40117.2	2009-10-30 22:46:03	-0.90224	-89.6128	1	109	11	1	4	45	59
40117.2	2009-10-30 23:01:03	-0.90207	-89.6125	1	109	11	1	5	1	0
40117.2	2009-10-30 23:16:03	-0.90245	-89.6126	1	109	11	1	5	15	59
40117.2	2009-10-30 23:31:03	-0.90204	-89.6126	1	109	11	1	5	30	59
40117.2	2009-10-30 23:46:03	-0.90226	-89.6121	1	109	11	1	5	46	0
40117.3	2009-10-31 00:01:03	-0.90206	-89.6125	1	109	11	1	6	0	59
40117.3	2009-10-31 00:16:03	-0.9024	-89.6124	1	109	11	1	6	15	59
40117.3	2009-10-31 00:31:03	-0.90243	-89.6125	1	109	11	1	6	31	0
40117.3	2009-10-31 00:46:03	-0.90225	-89.6125	1	109	11	1	6	45	59
40117.3	2009-10-31 01:01:03	-0.90286	-89.6129	1	109	11	1	7	0	59
40117.3	2009-10-31 01:16:03	-0.90229	-89.6126	1	109	11	1	7	16	0
40117.3	2009-10-31 01:31:03	-0.90207	-89.6123	1	109	11	1	7	30	59
40117.3	2009-10-31 01:46:03	-0.90221	-89.6125	1	109	11	1	7	45	59
40117.3	2009-10-31 02:01:03	-0.90211	-89.6121	1	109	11	1	8	1	0
40117.3	2009-10-31 02:16:03	-0.90234	-89.6124	1	109	11	1	8	15	59
40117.4	2009-10-31 02:31:03	-0.90213	-89.6128	1	109	11	1	8	30	59
40117.4	2009-10-31 02:46:03	-0.9022	-89.6116	1	109	11	1	8	46	0
40117.4	2009-10-31 03:01:03	-0.90167	-89.6113	1	109	11	1	9	0	59
40117.4	2009-10-31 03:31:03	-0.90209	-89.6129	1	109	11	1	9	31	0
40117.4	2009-10-31 03:46:03	-0.90227	-89.6124	1	109	11	1	9	45	59
40117.4	2009-10-31 04:01:03	-0.90233	-89.6123	1	109	11	1	10	0	59
40117.4	2009-10-31 04:16:03	-0.90218	-89.6126	1	109	11	1	10	16	0
40117.4	2009-10-31 04:31:03	-0.90234	-89.6125	1	109	11	1	10	30	59
40117.4	2009-10-31 04:46:03	-0.90233	-89.6126	1	109	11	1	10	45	59
40117.5	2009-10-31 05:01:03	-0.90206	-89.6123	1	109	11	1	11	1	0
40117.5	2009-10-31 05:16:03	-0.90213	-89.6125	1	109	11	1	11	15	59
40117.5	2009-10-31 05:31:03	-0.90179	-89.6127	1	109	11	1	11	30	59
40117.5	2009-10-31 05:46:03	-0.90172	-89.6125	1	109	11	1	11	46	0
40117.5	2009-10-31 06:01:03	-0.90138	-89.6127	1	109	11	1	12	0	59
40117.5	2009-10-31 06:16:03	-0.90218	-89.612	1	109	11	1	12	15	59
40117.5	2009-10-31 06:31:03	-0.90155	-89.6118	1	109	11	1	12	31	0
40117.5	2009-10-31 06:46:03	-0.90251	-89.6122	1	109	11	1	12	45	59
40117.5	2009-10-31 07:01:03	-0.90366	-89.6128	1	109	11	1	13	0	59
40117.6	2009-10-31 07:16:03	-0.90189	-89.612	1	109	11	1	13	16	0
40117.6	2009-10-31 07:31:03	-0.90206	-89.6124	1	109	11	1	13	30	59
40117.6	2009-10-31 07:46:03	-0.90207	-89.6124	1	109	11	1	13	45	59
40117.6	2009-10-31 08:01:03	-0.90186	-89.6129	1	109	11	1	14	1	0
40117.6	2009-10-31 08:16:03	-0.90195	-89.6121	1	109	11	1	14	15	59
40117.6	2009-10-31 08:31:03	-0.90229	-89.6124	1	109	11	1	14	30	59
40117.6	2009-10-31 08:46:03	-0.90186	-89.6124	1	109	11	1	14	46	0
40117.6	2009-10-31 09:01:03	-0.9019	-89.6124	1	109	11	1	15	0	59
40117.7	2009-10-31 10:41:24	-0.91791	-89.6746	1	109	11	1	16	41	20
40117.8	2009-10-31 13:22:03	-0.94214	-89.7271	1	109	11	1	19	21	59
40117.9	2009-10-31 14:45:17	-0.9422	-89.7282	1	109	11	1	20	45	14
40117.9	2009-10-31 15:56:03	-0.91881	-89.7338	1	109	11	1	21	56	0
40117.9	2009-10-31 16:25:32	-0.90741	-89.7365	1	109	11	1	22	25	28
40117.9	2009-10-31 16:45:23	-0.90397	-89.7327	1	109	11	1	22	45	20
40118.2	2009-10-31 21:57:38	-0.95374	-89.7354	1	109	11	2	3	57	35
40118.3	2009-11-01 01:43:20	-0.87392	-89.8026	1	109	11	2	7	43	16
40118.5	2009-11-01 05:23:05	-0.8724	-89.8073	1	109	11	2	11	23	2
40118.5	2009-11-01 06:43:03	-0.87054	-89.7906	1	109	11	2	12	42	59
40118.5	2009-11-01 06:58:03	-0.87078	-89.7892	1	109	11	2	12	58	0
40118.6	2009-11-01 07:31:39	-0.87366	-89.7823	1	109	11	2	13	31	35
40118.6	2009-11-01 07:48:43	-0.87831	-89.7763	1	109	11	2	13	48	39
40118.7	2009-11-01 09:54:00	-0.92835	-89.7272	1	109	11	2	15	53	57
40118.9	2009-11-01 15:15:03	-0.94401	-89.7321	1	109	11	2	21	15	0
40119	2009-11-01 18:08:30	-0.92388	-89.703	1	109	11	3	0	8	27
40119.1	2009-11-01 20:33:03	-0.90209	-89.6128	1	109	11	3	2	33	0
40119.1	2009-11-01 20:48:03	-0.90168	-89.6132	1	109	11	3	2	48	0
40119.1	2009-11-01 21:03:03	-0.90195	-89.6124	1	109	11	3	3	2	59
40119.1	2009-11-01 21:18:03	-0.9022	-89.6122	1	109	11	3	3	18	0
40119.1	2009-11-01 21:33:03	-0.90124	-89.6136	1	109	11	3	3	33	0
40119.2	2009-11-01 22:03:03	-0.90194	-89.6124	1	109	11	3	4	3	0
40119.2	2009-11-01 22:18:03	-0.9018	-89.6123	1	109	11	3	4	18	0
40119.2	2009-11-01 23:03:03	-0.90191	-89.6122	1	109	11	3	5	3	0
40119.2	2009-11-01 23:18:03	-0.90201	-89.6123	1	109	11	3	5	17	59
40119.2	2009-11-01 23:33:03	-0.90218	-89.6121	1	109	11	3	5	33	0
40119.2	2009-11-01 23:48:03	-0.90246	-89.6121	1	109	11	3	5	48	0
40119.3	2009-11-02 00:03:03	-0.9021	-89.6127	1	109	11	3	6	2	59
40119.3	2009-11-02 00:18:03	-0.90273	-89.6122	1	109	11	3	6	18	0
40119.3	2009-11-02 00:33:03	-0.90216	-89.6119	1	109	11	3	6	33	0
40119.3	2009-11-02 00:48:03	-0.90189	-89.6124	1	109	11	3	6	47	59
40119.3	2009-11-02 01:03:03	-0.90207	-89.6124	1	109	11	3	7	3	0
40119.3	2009-11-02 01:18:03	-0.9022	-89.6124	1	109	11	3	7	18	0
40119.3	2009-11-02 02:18:03	-0.90204	-89.6124	1	109	11	3	8	17	59
40119.4	2009-11-02 03:33:03	-0.90232	-89.6127	1	109	11	3	9	33	0
40119.4	2009-11-02 03:48:03	-0.90234	-89.6127	1	109	11	3	9	47	59
40119.4	2009-11-02 04:03:03	-0.90223	-89.6124	1	109	11	3	10	3	0
40119.5	2009-11-02 05:48:03	-0.90207	-89.6124	1	109	11	3	11	48	0
40119.6	2009-11-02 07:18:03	-0.90218	-89.6122	1	109	11	3	13	18	0
40119.8	2009-11-02 12:37:04	-0.94134	-89.7278	1	109	11	3	18	37	1
40119.8	2009-11-02 13:10:35	-0.93953	-89.7289	1	109	11	3	19	10	31
40119.9	2009-11-02 14:26:00	-0.94359	-89.7257	1	109	11	3	20	25	56
40119.9	2009-11-02 15:16:04	-0.94128	-89.7301	1	109	11	3	21	16	0
40120	2009-11-02 18:18:27	-0.90613	-89.7309	1	109	11	4	0	18	24
40120	2009-11-02 18:35:03	-0.90355	-89.733	1	109	11	4	0	35	0
40120.1	2009-11-02 20:16:52	-0.86294	-89.763	1	109	11	4	2	16	48
40120.1	2009-11-02 21:01:52	-0.83576	-89.7795	1	109	11	4	3	1	48
40120.1	2009-11-02 21:31:53	-0.8184	-89.7904	1	109	11	4	3	31	50
40120.8	2009-11-03 12:15:31	-0.88569	-89.7934	1	109	11	4	18	15	27
40121.1	2009-11-03 20:07:03	-0.90206	-89.6123	1	109	11	5	2	6	59
40121.1	2009-11-03 20:22:03	-0.90131	-89.6131	1	109	11	5	2	21	59
40121.1	2009-11-03 20:37:03	-0.90238	-89.6131	1	109	11	5	2	37	0
40121.1	2009-11-03 20:52:03	-0.90207	-89.6123	1	109	11	5	2	51	59
40121.1	2009-11-03 21:22:03	-0.90224	-89.6124	1	109	11	5	3	22	0
40121.2	2009-11-03 21:37:03	-0.90209	-89.6126	1	109	11	5	3	36	59
40121.2	2009-11-03 21:52:03	-0.90225	-89.6122	1	109	11	5	3	51	59
40121.2	2009-11-03 22:07:03	-0.90206	-89.6123	1	109	11	5	4	7	0
40121.3	2009-11-04 00:07:03	-0.90227	-89.6123	1	109	11	5	6	6	59
40121.3	2009-11-04 00:22:03	-0.90232	-89.6126	1	109	11	5	6	22	0
40121.3	2009-11-04 00:37:03	-0.90184	-89.6123	1	109	11	5	6	36	59
40121.3	2009-11-04 00:52:03	-0.90226	-89.6124	1	109	11	5	6	51	59
40121.3	2009-11-04 01:52:03	-0.90175	-89.612	1	109	11	5	7	52	0
40121.3	2009-11-04 02:07:03	-0.90255	-89.613	1	109	11	5	8	6	59
40121.3	2009-11-04 02:22:03	-0.90266	-89.6129	1	109	11	5	8	21	59
40121.4	2009-11-04 02:37:03	-0.90254	-89.6139	1	109	11	5	8	37	0
40121.4	2009-11-04 02:52:03	-0.90199	-89.6122	1	109	11	5	8	51	59
40121.4	2009-11-04 03:07:03	-0.90305	-89.6134	1	109	11	5	9	6	59
40121.4	2009-11-04 04:37:03	-0.90171	-89.6121	1	109	11	5	10	36	59
40121.5	2009-11-04 04:52:03	-0.90213	-89.6126	1	109	11	5	10	52	0
40121.5	2009-11-04 05:07:03	-0.90227	-89.613	1	109	11	5	11	6	59
40121.5	2009-11-04 05:52:03	-0.90201	-89.6121	1	109	11	5	11	51	59
40121.6	2009-11-04 07:13:03	-0.91619	-89.5941	1	109	11	5	13	12	59
40121.6	2009-11-04 08:13:03	-0.95068	-89.5534	1	109	11	5	14	12	59
