# Supplementary material for: Intraspecific variation in feeding strategies of Galapagos sea lions: A case of trophic specialization
Source: PLoS One. 2017 Oct 23;12(10):e0185165. doi: 10.1371/journal.pone.0185165 (PMC5653192; doi:10.1371/journal.pone.0185165)
Supplement: S2 File — (XLS) [file pone.0185165.s002.xls]

## Sheet: SCF01_iknos_DiveStat
DiveNumber	Year	Month	Day	Hour	Min	Sec	JulDate	Maxdepth	Dduration	Botttime	DescTime	DescRate	AscTime	AscRate	PDI	DWigglesDesc	DWigglesBott	DWigglesAsc	TotVertDistBot	BottRange	Efficiency	IDZ	LightAtBott	LWiggles	LightAtSurf	Lattenuation	EuphoticDepth	TempAtSurf	TempAtBott	ThermoclineDepth
1	2009	10	28	18	2	54	734075	5	168	78	78	0.045	12	0.333	53296	15	5	3	8.5	3	0.001	0	213.544	23	229.8	NaN	NaN	22.85	21.936	NaN
2	2009	10	29	8	53	58	734075	5	92	0	34	0.147	58	0.086	3470	3	1	3	0	0	0	1	38	1	34.8	NaN	NaN	26.1	27.8	0
3	2009	10	29	9	53	20	734075	7.5	166	104	54	0.102	8	0.938	36	1	5	1	5	2	0.515	0	68.434	23	81.5	NaN	NaN	19.6	18.651	0
4	2009	10	29	9	56	42	734075	12	120	78	14	0.786	28	0.429	38	1	7	1	5	1	0.494	0	62.1	11	79.5	NaN	NaN	20.6	18.603	0
5	2009	10	29	9	59	20	734075	10.5	138	58	26	0.404	54	0.185	836	1	3	1	1.5	1	0.06	0	62.45	9	74.8	NaN	NaN	20.45	18.572	4
6	2009	10	29	10	15	34	734075	28	162	60	66	0.364	36	0.556	40	1	1	1	12	8	0.297	0	45.984	5	65	NaN	NaN	20.5	17.74	0
7	2009	10	29	10	18	56	734075	39.5	210	72	82	0.47	56	0.679	52	1	9	1	8.5	2	0.275	0	40.338	3	58.3	NaN	NaN	20.9	16.388	0
8	2009	10	29	10	23	18	734075	24	170	62	60	0.342	48	0.458	54	1	5	1	8.5	4.5	0.277	0	44.258	5	61.3	NaN	NaN	20.7	18.284	0
9	2009	10	29	10	27	2	734075	18	154	4	62	0.258	88	0.199	20	3	1	3	2.5	2	0.023	0	47	1	67	NaN	NaN	20.65	18.583	5
10	2009	10	29	10	29	56	734075	38	208	36	102	0.314	70	0.493	40	3	1	1	9.5	6	0.145	0	40.158	3	62.8	NaN	NaN	20.65	16.832	0
11	2009	10	29	10	34	4	734075	18.5	180	108	44	0.364	28	0.518	50	1	17	1	15.5	4	0.47	0	44.386	11	73	NaN	NaN	20.7	18.771	3
12	2009	10	29	10	37	54	734075	26	166	32	80	0.287	54	0.435	2216	1	1	1	5.5	3	0.013	0	45.353	5	65.8	NaN	NaN	19.95	18.671	3
13	2009	10	29	11	17	36	734075	27.5	58	10	20	1.375	28	0.911	48	1	3	1	3	2.5	0.094	1	105.958	5	91.3	NaN	NaN	20.7	17.958	8
14	2009	10	29	11	19	22	734075	31.5	134	36	24	0.979	74	0.426	1154	1	5	3	23	14	0.028	0	104.382	11	132.5	NaN	NaN	20.7	18.224	2
15	2009	10	29	11	40	50	734075	127.5	246	20	64	1.938	162	0.787	9420	1	3	5	5.5	4	0.002	0	105.591	7	170	NaN	NaN	21.35	14.264	2
16	2009	10	29	14	21	56	734076	5.5	18	4	8	0.625	6	0.75	856	1	1	1	1.5	1	0.005	0	197.167	1	211.5	NaN	NaN	22.5	22.433	NaN
17	2009	10	29	14	36	30	734076	5	16	2	8	0.625	6	0.833	178	1	1	1	0	0	0.01	1	207.125	1	211.5	NaN	NaN	22.65	22.55	2
18	2009	10	29	14	39	44	734076	164.5	254	20	82	1.811	152	1.082	72	1	3	1	19	17.5	0.061	0	125.341	3	NaN	NaN	2.5	22.6	14.323	1
19	2009	10	29	14	45	10	734076	411	456	78	182	2.255	196	2.074	198	1	3	1	6	4.5	0.119	0	44.681	1	NaN	NaN	2.3	22.55	9.717	0
20	2009	10	29	14	56	4	734076	412	512	114	190	2.168	208	1.945	258	3	5	3	10.5	7.5	0.148	1	47.569	5	NaN	NaN	5	22.5	9.7	2
21	2009	10	29	15	8	54	734076	397	496	106	186	2.134	204	1.931	236	1	13	3	11	3	0.145	1	48.269	19	167.2	0.445	6.1	22.35	9.7	3
22	2009	10	29	15	21	6	734076	26	118	30	48	0.469	40	0.588	140	1	1	3	6	3.5	0.116	0	197.516	7	NaN	NaN	-23.4	22.35	18.631	4
23	2009	10	29	15	25	24	734076	391	546	158	188	2.037	200	1.94	298	1	13	1	72	22	0.187	0	50.872	15	NaN	NaN	5.1	22.3	9.676	0
24	2009	10	29	15	39	28	734076	389.5	608	230	182	2.113	196	1.982	308	1	21	3	22	5	0.251	1	51.815	25	NaN	NaN	4.6	22.3	9.531	1
25	2009	10	29	15	54	44	734076	392	582	202	174	2.216	206	1.903	242	1	15	3	15.5	6.5	0.245	1	48.902	17	182	1.403	6	22.2	9.535	2
26	2009	10	29	16	8	28	734076	10.5	70	28	22	0.455	20	0.375	72	1	3	1	4.5	3	0.197	0	204.6	11	209.6	-1.784	8.2	22.25	21.04	4
27	2009	10	29	16	10	50	734076	9	76	22	38	0.224	16	0.5	48	1	1	1	1.5	1	0.177	0	205.708	3	215.8	NaN	NaN	22.25	20.779	0
28	2009	10	29	16	12	54	734076	5	56	22	6	0.583	28	0.143	18	1	1	5	2.5	1.5	0.297	0	186.417	5	216.8	NaN	NaN	22.25	22.192	NaN
29	2009	10	29	16	14	8	734076	10.5	66	22	24	0.333	20	0.475	132	1	1	1	3.5	2.5	0.111	0	205.958	7	215.5	NaN	NaN	22.2	20.85	2
30	2009	10	29	16	17	26	734076	391.5	502	114	190	2.047	198	1.937	158	1	1	3	10.5	8	0.173	0	50.711	17	NaN	NaN	5.8	22.25	9.478	3
31	2009	10	29	16	28	26	734076	11.5	68	24	28	0.357	16	0.563	34	1	3	1	5	2.5	0.235	0	206.019	5	215.3	NaN	NaN	22.15	20.685	5
32	2009	10	29	16	30	8	734076	7	52	16	26	0.25	10	0.55	124	1	1	1	2	1.5	0.091	0	209.694	5	216.5	NaN	NaN	22.2	22.05	3
33	2009	10	29	16	33	4	734076	393.5	500	114	190	2.063	196	1.995	360	1	11	1	18	4.5	0.133	0	50.724	9	NaN	NaN	1.5	22.2	9.418	0
34	2009	10	29	16	47	24	734076	399.5	520	146	180	2.2	194	2.046	300	1	11	1	14	4.5	0.178	1	49.5	23	NaN	NaN	3.5	22.1	9.376	0
35	2009	10	29	17	1	4	734076	403.5	484	98	182	2.212	204	1.978	180	1	5	3	10	4	0.148	1	48.755	15	168.6	0.367	7	22	9.359	3
36	2009	10	29	17	12	8	734076	8	54	20	24	0.271	10	0.65	160	1	1	1	3	1.5	0.093	0	208.25	7	217.5	NaN	NaN	22	21.659	2
37	2009	10	29	17	15	42	734076	408	540	158	178	2.27	204	2	452	1	11	1	10	4	0.159	0	46.025	11	NaN	NaN	5.3	22	9.331	0
38	2009	10	29	17	32	14	734076	404	600	218	184	2.185	198	2.018	420	1	17	3	27.5	7	0.214	1	46.302	23	NaN	NaN	5	22.1	9.38	0
39	2009	10	29	17	49	14	734076	391.5	476	98	178	2.188	200	1.955	330	1	11	1	10.5	2	0.122	1	49.9	13	NaN	NaN	5.1	22.2	9.552	0
40	2009	10	29	18	2	40	734076	394.5	564	190	182	2.146	192	1.997	210	1	25	1	67.5	24.5	0.245	1	52.138	29	NaN	NaN	1.6	22.2	9.613	0
41	2009	10	29	18	15	34	734076	394.5	460	98	170	2.303	192	2.052	242	1	7	1	7.5	3	0.14	1	51.955	13	NaN	NaN	2.7	22.15	9.6	0
42	2009	10	29	18	27	16	734076	396.5	496	110	180	2.192	206	1.915	218	1	11	1	85	37.5	0.154	1	54.165	15	NaN	NaN	4.5	22.25	9.745	2
43	2009	10	29	18	39	10	734076	393	432	72	172	2.276	188	2.09	118	1	9	1	6.5	2	0.131	1	51.845	11	NaN	NaN	4.8	22.2	9.5	0
44	2009	10	29	18	48	20	734076	6	18	10	4	1.25	4	1.375	0	1	3	1	8.5	4.5	0.556	0	219.167	3	225	NaN	NaN	22.2	22.175	NaN
45	2009	10	29	18	48	38	734076	5	20	12	4	1.25	4	1.125	8	1	3	1	4.5	2.5	0.429	0	221.036	5	223.3	NaN	NaN	22.2	22.193	NaN
46	2009	10	29	18	49	6	734076	399	468	106	178	2.219	184	2.049	144	3	13	3	53	22.5	0.173	0	55.005	15	NaN	NaN	4.2	22.2	9.593	3
47	2009	10	29	18	59	18	734076	395	418	52	176	2.233	190	2.079	178	3	3	1	4	2	0.087	1	51.343	7	NaN	NaN	2.3	22.25	9.459	0
48	2009	10	29	19	9	14	734076	394.5	428	86	166	2.367	176	2.114	156	1	7	1	33	22.5	0.147	1	55.347	11	NaN	NaN	5.1	22.25	9.658	0
49	2009	10	29	19	18	58	734076	401	492	106	182	2.173	204	1.966	176	1	13	5	23.5	11.5	0.159	1	54.12	15	NaN	NaN	5.5	22.25	9.556	0
50	2009	10	29	19	30	6	734076	392.5	428	34	186	2.105	208	1.885	288	1	5	1	3.5	1.5	0.047	1	54.444	1	NaN	NaN	4.1	22.2	9.55	0
51	2009	10	29	19	42	2	734076	398	574	198	176	2.233	200	1.99	304	1	13	3	11	5.5	0.226	1	51.55	23	162.8	0.29	8.6	22.2	9.303	2
52	2009	10	29	19	56	40	734076	408	536	158	180	2.253	198	2.058	760	1	9	1	7	2.5	0.122	1	49.656	13	NaN	NaN	3.5	22.3	9.045	0
53	2009	10	29	20	18	16	734076	395	470	76	198	1.985	196	2.015	236	1	1	1	2	2	0.108	1	51.718	11	199.2	-0.537	8.9	22.2	9.656	0
54	2009	10	29	20	30	2	734076	10.5	74	8	42	0.25	24	0.417	62	1	1	1	0.5	0.5	0.059	0	206.6	3	219.8	NaN	NaN	22.2	21.29	5
55	2009	10	29	20	32	18	734076	10.5	84	16	38	0.224	30	0.35	58	1	1	1	2	2	0.113	1	204.611	3	217	NaN	NaN	22.2	21.717	3
56	2009	10	29	20	34	40	734076	20	94	38	38	0.487	18	0.861	46	1	1	1	6	4.5	0.271	0	204.412	11	210.8	1.988	7.5	22.15	18.985	0
57	2009	10	29	20	37	0	734076	8.5	84	26	40	0.175	18	0.417	214	3	3	1	3.5	1.5	0.087	0	210.089	9	219.3	NaN	NaN	22.2	21.982	NaN
58	2009	10	29	20	41	58	734076	23	100	26	46	0.5	28	0.661	378	1	1	1	4.5	4.5	0.054	0	202.25	9	NaN	NaN	-12.1	22.3	18.411	3
59	2009	10	29	20	49	56	734076	398.5	508	102	200	1.98	206	1.934	66	1	9	1	6.5	2.5	0.178	0	48.346	15	NaN	NaN	5.9	22.1	9.236	2
60	2009	10	29	20	59	30	734076	5	26	18	6	0.75	2	2.25	22	1	3	1	9	4.5	0.375	0	205.25	5	207.8	NaN	NaN	22.2	22.165	NaN
61	2009	10	29	21	0	18	734076	11	62	26	24	0.354	12	0.833	88	1	1	1	3.5	2.5	0.173	0	205.018	9	220.8	NaN	NaN	22.2	22.043	NaN
62	2009	10	29	21	2	48	734076	9	70	20	28	0.321	22	0.318	252	1	1	1	2	2	0.062	0	206.614	7	210.5	NaN	NaN	22.2	21.982	2
63	2009	10	29	21	8	10	734076	15.5	104	36	46	0.283	22	0.523	26	1	1	1	6.5	4	0.277	0	203.513	7	216.5	NaN	NaN	22.2	19.092	1
64	2009	10	29	21	10	20	734076	5	14	2	2	2.5	10	0.5	12	1	1	1	0	0	0.077	0	179.875	1	220.8	NaN	NaN	22.2	22.2	NaN
65	2009	10	29	21	10	46	734076	14	86	24	40	0.325	22	0.591	32	1	1	1	2	1	0.203	0	207.192	11	213	NaN	NaN	22.2	21.504	7
66	2009	10	29	21	12	44	734076	5.5	12	6	4	1.375	2	2.5	100	1	1	1	0.5	0.5	0.054	0	213.063	3	221.5	NaN	NaN	22.2	22.15	NaN
67	2009	10	29	21	14	36	734076	8	14	0	2	4	12	0.667	32	1	1	1	0	0	0	0	221.25	1	221.8	NaN	NaN	22.2	22.15	0
68	2009	10	29	21	15	22	734076	8	62	22	24	0.292	16	0.469	258	1	1	1	1.5	1	0.069	1	208.146	5	215.5	NaN	NaN	22.1	21.917	2
69	2009	10	29	21	20	42	734076	353.5	502	174	158	2.111	170	2.053	328	1	17	1	45.5	20	0.21	0	65.435	35	170.6	0.643	8.6	22.15	10.383	0
70	2009	10	29	21	34	32	734076	337	442	98	166	2.018	178	1.882	380	1	7	1	11	3	0.119	1	66.41	13	NaN	NaN	3.2	22.2	10.659	0
71	2009	10	29	21	48	14	734076	5	72	38	24	0.146	10	0.4	78	3	3	1	3.5	1.5	0.253	0	198.875	15	204	NaN	NaN	22.15	21.863	NaN
72	2009	10	29	21	50	44	734076	5	64	30	24	0.188	10	0.35	164	1	1	1	2	1.5	0.132	1	200.047	9	207.5	NaN	NaN	22.1	21.997	NaN
73	2009	10	29	21	54	32	734076	5.5	50	28	8	0.5	14	0.357	74	1	3	1	3	2	0.226	0	203.283	7	217	NaN	NaN	22.15	22.06	NaN
74	2009	10	29	21	56	36	734076	6.5	86	46	26	0.192	14	0.393	754	1	1	1	2.5	1.5	0.055	0	204.667	15	209.3	NaN	NaN	22.15	21.902	0
75	2009	10	29	22	10	36	734076	8.5	74	24	28	0.286	22	0.295	1208	3	1	1	2.5	2	0.019	0	198.75	7	218.5	NaN	NaN	22.05	21.781	4
76	2009	10	29	22	31	58	734076	5.5	58	22	24	0.188	12	0.417	168	1	1	1	1.5	1	0.097	0	192.292	7	200	NaN	NaN	22.05	21.938	2
77	2009	10	29	22	35	44	734076	5.5	48	22	16	0.25	10	0.55	2458	1	1	1	1.5	1.5	0.009	1	193.917	5	215.3	NaN	NaN	22	21.987	NaN
78	2009	10	29	23	17	30	734076	8.5	68	16	38	0.224	14	0.429	132	1	1	1	2.5	2.5	0.08	0	184.917	3	182.8	NaN	NaN	22	21.833	NaN
79	2009	10	29	23	20	50	734076	5.5	64	38	14	0.286	12	0.333	262	1	3	1	4	1.5	0.117	0	185.3	11	209.8	NaN	NaN	21.95	21.905	NaN
80	2009	10	29	23	26	16	734076	9	72	18	30	0.217	24	0.375	360	1	1	1	2.5	2.5	0.042	0	179.9	5	197.8	NaN	NaN	21.95	21.7	3
81	2009	10	29	23	33	28	734076	32.5	142	30	70	0.464	42	0.583	76	3	3	1	10	9	0.138	0	162.156	7	189.5	NaN	NaN	21.9	17.569	6
82	2009	10	29	23	37	6	734076	6	78	44	22	0.205	12	0.375	254	1	3	1	4	1.5	0.133	0	170.293	9	186.8	NaN	NaN	21.85	21.809	NaN
83	2009	10	29	23	42	38	734076	7	80	16	40	0.163	24	0.292	154	1	3	1	1.5	0.5	0.068	0	169	3	184.5	NaN	NaN	21.85	21.656	3
84	2009	10	29	23	46	32	734076	53	128	4	68	0.772	56	0.929	100	1	1	1	1.5	1	0.018	0	132.917	1	176.5	NaN	NaN	21.85	16.533	2
85	2009	10	29	23	50	20	734076	10.5	100	38	42	0.238	20	0.4	42	1	3	1	4	2.5	0.268	0	153.363	9	175.5	NaN	NaN	21.85	20.695	2
86	2009	10	29	23	52	42	734076	70.5	146	32	58	1.216	56	1.018	48	1	7	1	17.5	14	0.165	0	113.206	9	169.8	NaN	NaN	21.85	16.276	2
87	2009	10	29	23	55	56	734076	105	206	38	52	1.452	116	0.905	60	1	3	7	32.5	31	0.143	0	96.688	7	157.3	NaN	NaN	21.85	15.282	0
88	2009	10	30	0	0	22	734076	59	136	2	62	0.952	72	0.819	94	1	1	1	0	0	0.009	0	104.375	1	155.3	NaN	NaN	21.8	16.25	4
89	2009	10	30	0	4	12	734076	393	430	6	222	1.768	202	1.946	106	3	1	1	0.5	0.5	0.011	0	36.438	1	116.5	NaN	NaN	21.8	9.25	0
90	2009	10	30	0	13	8	734076	22	144	70	34	0.515	40	0.487	24	1	1	5	7	4.5	0.417	0	97.653	17	115.3	NaN	NaN	21.85	17.651	4
91	2009	10	30	0	15	56	734076	75.5	204	8	116	0.638	80	0.944	66	1	1	1	1.5	1.5	0.03	0	61.1	1	117.5	NaN	NaN	21.85	15.65	2
92	2009	10	30	0	20	26	734076	80	246	48	110	0.727	88	0.744	38	1	3	1	15.5	14.5	0.169	1	55.62	5	110.3	NaN	NaN	21.8	15.386	1
93	2009	10	30	0	25	10	734076	57.5	226	64	98	0.439	64	0.898	72	1	5	1	16.5	14.5	0.215	0	63.22	7	107	NaN	NaN	21.75	16.382	3
94	2009	10	30	0	30	8	734076	88.5	252	74	120	0.596	58	1.25	36	1	3	1	34	17.5	0.257	0	47.257	3	102	NaN	NaN	21.7	15.555	0
95	2009	10	30	0	34	56	734076	12.5	96	26	44	0.284	26	0.365	42	1	3	1	4	3	0.188	0	71.768	5	94.3	NaN	NaN	21.8	20.836	5
96	2009	10	30	0	37	14	734076	8	104	40	30	0.267	34	0.191	60	1	3	1	4.5	1.5	0.244	0	83.107	9	84.8	NaN	NaN	21.85	21.44	3
97	2009	10	30	0	39	58	734076	8	100	50	28	0.214	22	0.273	44	1	1	1	4	2	0.347	1	80.365	13	96.8	NaN	NaN	21.85	21.348	1
98	2009	10	30	0	42	22	734076	26.5	178	34	102	0.25	42	0.536	74	1	5	1	7	4	0.135	0	77.625	9	87	NaN	NaN	21.85	17.308	3
99	2009	10	30	0	46	34	734076	45	228	94	54	0.667	80	0.563	34	1	9	1	17	9.5	0.359	0	69.63	15	86	NaN	NaN	21.8	16.572	4
100	2009	10	30	0	50	56	734076	47.5	228	72	84	0.435	72	0.542	34	1	1	1	19.5	11	0.275	1	67.534	11	99	NaN	NaN	21.7	16.534	1
101	2009	10	30	0	55	18	734076	44	230	62	102	0.426	66	0.538	26	1	5	5	12	8.5	0.242	1	69.547	7	99	NaN	NaN	21.7	16.831	5
102	2009	10	30	0	59	34	734076	57.5	248	66	92	0.473	90	0.628	68	3	1	1	15	14	0.209	0	64.853	7	95.8	NaN	NaN	21.65	16.531	1
103	2009	10	30	1	4	50	734076	89.5	272	24	146	0.565	102	0.877	74	1	1	1	7	7	0.069	0	48.769	1	98.8	NaN	NaN	21.65	15.388	0
104	2009	10	30	1	10	36	734076	109	308	10	196	0.538	102	1.069	52	1	1	1	3.5	3.5	0.028	0	43.083	1	97.8	NaN	NaN	21.7	15.142	0
105	2009	10	30	1	16	36	734076	93.5	282	52	144	0.576	86	1.087	118	1	3	1	11.5	10.5	0.13	0	48.704	1	98	NaN	NaN	21.65	15.296	1
106	2009	10	30	1	23	16	734076	129.5	320	42	138	0.928	140	0.925	106	1	5	1	8.5	4.5	0.099	0	38.648	3	69.5	NaN	NaN	21.65	14.484	0
107	2009	10	30	1	30	22	734076	421.5	580	106	222	1.894	252	1.665	98	1	1	1	3	2	0.156	0	30.986	1	99	NaN	NaN	21.6	8.75	0
108	2009	10	30	1	41	40	734076	7	82	40	22	0.227	20	0.25	28	1	3	1	5	2	0.364	0	72.726	7	96.5	NaN	NaN	21.6	21.267	3
109	2009	10	30	1	43	30	734076	41.5	212	36	104	0.317	72	0.576	188	1	3	1	9.5	9	0.09	0	71.145	3	98.5	NaN	NaN	21.6	16.642	1
110	2009	10	30	1	50	10	734076	17.5	152	68	52	0.288	32	0.516	110	1	7	1	9.5	2.5	0.26	0	83.1	21	101	NaN	NaN	21.65	17.75	3
111	2009	10	30	1	54	32	734076	36.5	176	28	88	0.381	60	0.525	50	1	1	1	8	5	0.124	0	73.983	3	93.5	NaN	NaN	21.6	16.847	2
112	2009	10	30	1	58	18	734076	5.5	70	30	32	0.125	8	0.5	32	1	1	1	3	1.5	0.294	0	65.875	5	95.3	NaN	NaN	21.6	21.541	NaN
113	2009	10	30	2	0	0	734076	6.5	90	26	36	0.139	28	0.214	0	3	3	3	3	1.5	0.289	0	88.411	5	98.5	NaN	NaN	21.6	21.429	3
114	2009	10	30	2	1	30	734076	6.5	78	28	34	0.147	16	0.313	42	3	1	1	3	1.5	0.233	1	62.267	5	99.5	NaN	NaN	21.6	21.3	3
115	2009	10	30	2	3	30	734076	5.5	48	22	14	0.286	12	0.333	130	1	1	1	3	1.5	0.124	0	77.625	5	102	NaN	NaN	21.6	21.383	1
116	2009	10	30	2	6	28	734076	7.5	76	24	36	0.194	16	0.375	36	1	1	1	2	1.5	0.214	0	90.827	5	95.3	NaN	NaN	21.55	21.042	4
117	2009	10	30	2	8	20	734076	20	140	72	34	0.412	34	0.412	44	1	1	1	12	6	0.391	0	85.372	13	86.3	NaN	NaN	21.55	17.582	3
118	2009	10	30	2	11	24	734076	25.5	160	62	50	0.37	48	0.438	48	3	3	1	12.5	7.5	0.298	0	81.711	13	78	NaN	NaN	21.55	17.373	3
119	2009	10	30	2	14	52	734076	18.5	156	60	46	0.283	50	0.3	32	1	5	1	11	5.5	0.319	0	85.952	17	97.5	NaN	NaN	21.55	17.685	2
120	2009	10	30	2	18	0	734076	20.5	156	82	50	0.4	24	0.604	42	1	5	1	8.5	6	0.414	0	85.214	25	97.8	NaN	NaN	21.6	17.375	0
121	2009	10	30	2	21	18	734076	20	188	104	50	0.33	34	0.412	34	1	3	5	10.5	6	0.468	1	85.722	33	100.5	NaN	NaN	21.5	17.413	2
122	2009	10	30	2	25	0	734076	19.5	164	90	42	0.393	32	0.484	36	1	3	1	8	4	0.45	1	85.25	23	99.8	NaN	NaN	21.5	17.296	1
123	2009	10	30	2	28	20	734076	19	146	70	44	0.364	32	0.453	36	1	7	1	10.5	4.5	0.385	1	85.625	21	100.3	NaN	NaN	21.5	17.382	1
124	2009	10	30	2	31	22	734076	18.5	90	32	34	0.441	24	0.625	22	1	1	1	7	3.5	0.286	1	85.029	9	97.8	NaN	NaN	21.45	17.529	0
125	2009	10	30	2	33	14	734076	32	232	94	72	0.424	66	0.341	6	3	3	7	12	9.5	0.395	0	79.656	15	98	NaN	NaN	21.45	16.701	2
126	2009	10	30	2	37	12	734076	23	208	76	60	0.333	72	0.243	8	3	3	9	9.5	5.5	0.352	0	83.66	17	100	NaN	NaN	21.5	17.329	2
127	2009	10	30	2	40	48	734076	30.5	184	106	42	0.56	36	0.625	28	1	3	3	16	8	0.5	0	79.889	29	100.5	NaN	NaN	21.45	16.906	2
128	2009	10	30	2	44	20	734076	23	168	84	42	0.393	42	0.488	30	3	7	1	13	6.5	0.424	0	83.541	21	100.5	NaN	NaN	21.45	17.426	2
129	2009	10	30	2	47	38	734076	27	196	76	58	0.431	62	0.315	16	3	3	5	10.5	7.5	0.358	0	82.551	19	100.5	NaN	NaN	21.5	17.308	2
130	2009	10	30	2	51	10	734076	25.5	170	72	50	0.43	48	0.406	26	1	1	5	10	6	0.367	1	82.297	19	94	NaN	NaN	21.4	17.438	1
131	2009	10	30	2	54	26	734076	19	146	68	50	0.31	28	0.482	42	1	3	1	10	5.5	0.362	0	85.786	15	86.3	NaN	NaN	21.4	17.686	3
132	2009	10	30	2	57	34	734076	32	172	56	58	0.5	58	0.388	42	1	1	1	12.5	9.5	0.262	0	79.241	15	96.8	NaN	NaN	21.35	17.06	1
133	2009	10	30	3	1	8	734076	20	154	76	48	0.406	30	0.567	38	1	3	1	8.5	3	0.396	0	84.128	21	93	NaN	NaN	21.35	17.605	2
134	2009	10	30	3	4	20	734076	23	168	76	50	0.41	42	0.429	24	1	1	1	7.5	5	0.396	0	83.173	23	99	NaN	NaN	21.3	17.56	4
135	2009	10	30	3	7	32	734076	20	148	74	46	0.359	28	0.5	32	3	3	1	11.5	6	0.411	0	85.23	17	100	NaN	NaN	21.25	17.711	3
136	2009	10	30	3	10	32	734076	38	184	32	68	0.404	84	0.452	16	1	1	7	10.5	10.5	0.16	0	76.515	7	96.8	NaN	NaN	21.25	17.053	2
137	2009	10	30	3	13	52	734076	16	146	82	36	0.389	28	0.411	38	1	5	1	9.5	4.5	0.446	0	86.923	21	97.5	NaN	NaN	21.2	17.717	1
138	2009	10	30	3	16	56	734076	19.5	146	72	38	0.395	36	0.403	36	1	5	1	13.5	6.5	0.396	0	85.291	21	100.3	NaN	NaN	21.2	17.678	4
139	2009	10	30	3	19	58	734076	21.5	156	84	38	0.513	34	0.5	32	1	5	1	8.5	4.5	0.447	0	83.959	23	99.8	NaN	NaN	21.15	17.613	3
140	2009	10	30	3	23	6	734076	19.5	136	62	40	0.463	34	0.485	28	1	3	1	5	3	0.378	1	85.227	21	96	NaN	NaN	21.15	17.689	3
141	2009	10	30	3	25	50	734076	20	142	62	52	0.356	28	0.518	40	1	1	1	7	5.5	0.341	1	85.367	17	95.8	NaN	NaN	21.1	17.686	3
142	2009	10	30	3	28	52	734076	24.5	160	78	50	0.43	32	0.547	36	1	3	1	12	7	0.398	0	83.138	19	100.5	NaN	NaN	21.05	17.473	2
143	2009	10	30	3	32	8	734076	25	162	86	38	0.474	38	0.632	24	1	3	1	11	7	0.462	1	83.091	21	99.5	NaN	NaN	21	17.498	0
144	2009	10	30	3	35	14	734076	20	150	72	48	0.302	30	0.5	36	3	1	1	10.5	5.5	0.387	0	85.216	19	97.5	NaN	NaN	20.95	17.635	1
145	2009	10	30	3	38	20	734076	23.5	164	56	48	0.49	60	0.292	46	1	5	3	8	6	0.267	0	83.241	13	96	NaN	NaN	20.9	17.498	1
146	2009	10	30	3	41	50	734076	19.5	134	98	20	0.9	16	0.969	22	1	7	1	20.5	6	0.628	0	76.94	29	92.3	NaN	NaN	20.8	17.766	2
147	2009	10	30	3	44	26	734076	32.5	210	110	42	0.69	58	0.457	42	1	7	1	22.5	6	0.437	0	77.241	31	100.5	NaN	NaN	20.8	16.859	0
148	2009	10	30	3	48	38	734076	276.5	278	4	138	1.971	136	2.018	148	7	1	1	6.5	4.5	0.009	0	39.667	1	96.3	NaN	NaN	20.8	12.867	0
149	2009	10	30	3	55	44	734076	160.5	228	92	52	2.548	84	1.911	170	1	3	1	136	81.5	0.231	0	43.431	9	99.8	NaN	NaN	20.7	14.999	0
150	2009	10	30	4	2	22	734076	15.5	60	22	12	1.125	26	0.538	34	1	1	1	3.5	2	0.234	0	82.854	7	94.5	NaN	NaN	20.75	17.85	1
151	2009	10	30	4	3	56	734076	15.5	74	34	18	0.861	22	0.5	26	1	3	1	5.5	4.5	0.34	1	82.833	7	96.8	NaN	NaN	20.75	17.85	1
152	2009	10	30	4	5	36	734076	19	118	80	14	1.25	24	0.563	20	1	5	1	17	5.5	0.58	0	82.39	23	97.3	NaN	NaN	20.7	17.696	0
153	2009	10	30	4	7	54	734076	58.5	148	2	120	0.487	26	2.25	20	5	1	1	0	0	0.012	0	57.5	1	92.8	NaN	NaN	20.75	15.8	0
154	2009	10	30	4	10	42	734076	5.5	24	0	4	1.375	20	0.275	70	1	1	3	0	0	0	0	84.5	1	94	NaN	NaN	20.65	19.6	2
155	2009	10	30	4	12	16	734076	16	76	34	18	0.778	24	0.479	24	1	3	1	7.5	5	0.34	0	83.764	11	97.8	NaN	NaN	20.7	17.806	1
156	2009	10	30	4	13	56	734076	12.5	80	44	14	0.893	22	0.455	14	1	5	1	12.5	4.5	0.468	0	84.913	15	85.5	NaN	NaN	20.65	17.913	1
157	2009	10	30	4	15	30	734076	12	68	38	14	0.857	16	0.531	16	1	3	1	5.5	4	0.452	1	87.55	13	88	NaN	NaN	20.65	17.907	0
158	2009	10	30	4	16	54	734076	13.5	76	44	14	0.857	18	0.528	14	1	5	1	7.5	4.5	0.489	0	84.891	13	93	NaN	NaN	20.65	17.896	1
159	2009	10	30	4	18	24	734076	17.5	138	44	22	0.795	72	0.188	4	1	5	9	16	9	0.31	0	82.793	7	101.5	NaN	NaN	20.6	17.798	1
160	2009	10	30	4	20	46	734076	17.5	82	4	26	0.635	52	0.327	10	1	1	3	1.5	1	0.043	1	83.167	1	93.5	NaN	NaN	20.6	17.75	2
161	2009	10	30	4	22	18	734076	13.5	128	82	16	0.75	30	0.417	16	1	11	5	14.5	3.5	0.569	0	83.226	25	97.8	NaN	NaN	20.6	18.079	3
162	2009	10	30	4	24	42	734076	20.5	148	20	92	0.212	36	0.528	22	5	1	1	2.5	1.5	0.118	0	78.955	5	97.3	NaN	NaN	20.55	17.682	2
163	2009	10	30	4	27	32	734076	24	134	30	46	0.5	58	0.345	18	3	1	1	5	4	0.197	0	79.422	5	93.8	NaN	NaN	20.55	17.294	2
164	2009	10	30	4	30	4	734076	24	114	22	30	0.783	62	0.331	14	1	1	3	4	3.5	0.172	1	78.438	3	93.8	NaN	NaN	20.6	17.538	1
165	2009	10	30	4	32	12	734076	68	170	2	74	0.919	94	0.723	30	1	1	1	0	0	0.01	0	55.5	1	98.8	NaN	NaN	20.6	15.7	3
166	2009	10	30	4	35	32	734076	20	66	8	26	0.75	32	0.625	8	1	1	1	0.5	0.5	0.108	0	77.8	3	94	NaN	NaN	20.55	17.64	3
167	2009	10	30	4	36	46	734076	23	118	24	32	0.703	62	0.363	10	1	5	1	5	2	0.188	0	76.942	7	98.5	NaN	NaN	20.55	17.25	0
168	2009	10	30	4	38	54	734076	70.5	216	8	72	0.979	136	0.507	36	1	1	1	1.5	1.5	0.032	0	52.25	1	100.5	NaN	NaN	20.55	15.7	1
169	2009	10	30	4	43	6	734076	24.5	110	56	34	0.721	20	0.875	26	1	1	1	7	7	0.412	0	75.966	17	96	NaN	NaN	20.55	17.505	3
170	2009	10	30	4	45	22	734076	18.5	108	26	40	0.463	42	0.31	16	3	3	1	6.5	5.5	0.21	0	80.536	7	94.3	NaN	NaN	20.55	17.832	5
171	2009	10	30	4	47	26	734076	128.5	236	12	154	0.831	70	1.836	98	7	3	1	3.5	2	0.036	0	42.179	1	99.5	NaN	NaN	20.5	15.25	3
172	2009	10	30	4	53	0	734076	17	86	46	16	1.031	24	0.5	22	1	1	3	5.5	5	0.426	0	82.083	19	97	NaN	NaN	20.55	17.842	3
173	2009	10	30	4	54	48	734076	124.5	220	4	148	0.828	68	1.816	102	13	1	1	3	2	0.012	0	44.833	1	99	NaN	NaN	20.5	15.3	1
174	2009	10	30	5	0	10	734076	163.5	244	4	154	1.055	86	1.901	94	7	1	1	2	1.5	0.012	0	39	1	97.5	NaN	NaN	20.5	13.9	0
175	2009	10	30	5	5	48	734076	105.5	198	4	134	0.78	60	1.733	72	5	1	1	2.5	1.5	0.015	0	45.417	1	94	NaN	NaN	20.45	15.35	0
176	2009	10	30	5	10	18	734076	20.5	74	28	14	1.214	32	0.609	16	1	1	1	4.5	3.5	0.311	0	73.933	7	94.5	NaN	NaN	20.45	17.613	0
177	2009	10	30	5	11	48	734076	24	92	52	20	0.875	20	1.2	14	1	3	1	18.5	12.5	0.491	0	74.898	15	94.8	NaN	NaN	20.5	17.93	1
178	2009	10	30	5	13	34	734076	7	36	22	4	1.75	10	0.6	72	1	3	1	3	2	0.204	0	76.271	5	96.5	NaN	NaN	20.5	19.975	2
179	2009	10	30	5	15	22	734076	124.5	254	16	170	0.656	68	1.831	92	5	3	1	14	13.5	0.046	0	42.167	1	76	NaN	NaN	20.5	15.35	1
180	2009	10	30	5	21	8	734076	15.5	68	32	18	0.861	18	0.639	18	1	1	1	4	4	0.372	0	81.603	11	92	NaN	NaN	20.5	18.256	2
181	2009	10	30	5	22	34	734076	25.5	144	50	62	0.411	32	0.781	0	5	7	5	28.5	12	0.347	0	71.577	15	97.5	NaN	NaN	20.5	17.915	4
182	2009	10	30	5	24	58	734076	5	30	20	2	2	8	0.5	122	1	3	1	7	3.5	0.132	0	79.568	5	96.3	NaN	NaN	20.45	20.486	NaN
183	2009	10	30	5	27	30	734076	16.5	58	14	18	0.917	26	0.519	4	1	1	1	3	3	0.226	0	79.469	5	94	NaN	NaN	20.5	18.094	2
184	2009	10	30	5	28	32	734076	66.5	130	18	82	0.805	30	2.183	114	5	3	1	3.5	1.5	0.074	0	50.3	1	66.3	NaN	NaN	20.5	15.85	0
185	2009	10	30	5	32	36	734076	19	74	22	20	0.9	32	0.578	0	1	3	1	2.5	1.5	0.297	0	74.208	9	95.3	NaN	NaN	20.45	17.946	0
186	2009	10	30	5	33	50	734076	136.5	186	4	108	1.236	74	1.831	82	5	1	1	4	3	0.015	0	42.583	1	88	NaN	NaN	20.45	15.35	3
187	2009	10	30	5	38	18	734076	74	168	24	102	0.51	42	1.75	62	9	1	1	22.5	22	0.104	0	50.231	3	92.8	NaN	NaN	20.4	16.035	2
188	2009	10	30	5	42	8	734076	16.5	78	38	20	0.825	20	0.7	22	1	3	1	12.5	7.5	0.38	0	79.563	13	95	NaN	NaN	20.35	18.743	1
189	2009	10	30	5	43	48	734076	142	188	30	78	1.346	80	1.738	64	5	3	1	44	37	0.119	0	43.078	1	94	NaN	NaN	20.45	15.431	2
190	2009	10	30	5	48	0	734076	12.5	50	14	14	0.857	22	0.568	22	1	1	1	0.5	0.5	0.194	0	81.438	3	91	NaN	NaN	20.45	18.181	2
191	2009	10	30	5	49	12	734076	159.5	212	42	84	1.506	86	1.855	86	5	1	1	33	33	0.141	0	40.284	1	77.8	NaN	NaN	20.45	14.773	0
192	2009	10	30	5	54	10	734076	13	64	36	14	0.929	14	0.714	18	1	3	1	4	3	0.439	0	80.211	9	92.8	NaN	NaN	20.5	18.205	1
193	2009	10	30	5	55	32	734076	48.5	158	4	124	0.391	30	1.617	94	9	1	3	0	0	0.016	0	55.333	1	95.5	NaN	NaN	20.45	16.417	1
194	2009	10	30	5	59	44	734076	15	118	16	14	0.893	88	0.17	50	1	3	11	4.5	2.5	0.095	0	72.611	5	93.3	NaN	NaN	20.4	18.117	4
195	2009	10	30	6	2	32	734076	29	102	22	44	0.466	36	0.806	0	5	3	3	10.5	9.5	0.216	0	67.104	5	88.5	NaN	NaN	20.4	17.233	3
196	2009	10	30	6	4	14	734076	9	40	18	16	0.438	6	1.5	64	1	5	1	8	4.5	0.173	0	76.725	5	86.8	NaN	NaN	20.4	19.955	0
197	2009	10	30	6	5	58	734076	15.5	48	24	10	1.35	14	0.786	6	1	1	1	6.5	4.5	0.444	0	77.442	7	92	NaN	NaN	20.4	18.408	4
198	2009	10	30	6	6	52	734076	214	240	12	104	2.034	124	1.726	68	5	3	1	13.5	7.5	0.039	0	39.429	1	77.3	NaN	NaN	20.35	13.564	2
199	2009	10	30	6	12	0	734076	60	148	4	108	0.556	36	1.667	62	11	1	1	0	0	0.019	0	52.333	1	92.3	NaN	NaN	20.35	15.85	2
200	2009	10	30	6	15	30	734076	178	236	4	138	1.272	94	1.872	154	3	1	3	4.5	2.5	0.01	0	39.083	1	87.3	NaN	NaN	20.3	13.817	1
201	2009	10	30	6	22	0	734076	131	218	10	142	0.912	66	1.985	172	13	3	1	4.5	3	0.026	0	41.042	1	97.5	NaN	NaN	20.3	15.35	4
202	2009	10	30	6	28	30	734076	202.5	330	4	134	1.489	192	1.052	48	5	1	3	3.5	3	0.011	0	38.667	1	95.8	NaN	NaN	20.3	13.517	3
203	2009	10	30	6	34	48	734076	174.5	222	4	124	1.367	94	1.84	114	5	1	3	6.5	5	0.012	0	40.167	1	77.3	NaN	NaN	20.35	13.8	2
204	2009	10	30	6	40	24	734076	41	148	22	28	1.357	98	0.352	116	1	1	11	9.5	6.5	0.083	0	54.125	5	88.3	NaN	NaN	20.35	16.637	0
205	2009	10	30	6	44	48	734076	21.5	90	28	42	0.369	20	1.05	56	3	5	1	8.5	6.5	0.192	0	66.15	7	81.3	NaN	NaN	20.35	17.653	0
206	2009	10	30	6	47	14	734076	121.5	238	4	114	1.048	120	1.013	60	3	1	9	3	2.5	0.013	0	42	1	88.8	NaN	NaN	20.35	15.4	1
207	2009	10	30	6	52	12	734076	164	256	30	138	0.957	88	1.864	122	5	3	1	43	32	0.079	0	39.609	1	91.5	NaN	NaN	20.35	14.328	0
208	2009	10	30	6	58	30	734076	5	40	10	14	0.321	16	0.281	140	1	1	1	1	0.5	0.056	0	64.625	3	91	NaN	NaN	20.3	20.275	NaN
209	2009	10	30	7	1	30	734076	119.5	244	2	180	0.664	62	1.927	204	13	1	1	0	0	0.004	0	41.25	1	95.3	NaN	NaN	20.35	15.425	4
210	2009	10	30	7	8	58	734076	14	64	16	22	0.636	26	0.462	30	1	1	1	2	2	0.17	0	71.889	5	88	NaN	NaN	20.35	18.267	5
211	2009	10	30	7	10	32	734076	91	184	4	130	0.7	50	1.81	122	9	1	1	0.5	0.5	0.013	0	45.583	1	87.5	NaN	NaN	20.35	15.7	0
212	2009	10	30	7	15	38	734076	5.5	50	24	8	0.5	18	0.278	52	1	1	1	2	1.5	0.235	0	79.673	9	95.8	NaN	NaN	20.35	20.35	NaN
213	2009	10	30	7	17	20	734076	26	94	4	52	0.5	38	0.671	36	1	1	1	0.5	0.5	0.031	0	59.75	1	95.3	NaN	NaN	20.35	17.65	4
214	2009	10	30	7	19	30	734076	13.5	70	24	24	0.563	22	0.455	16	1	3	1	4.5	4	0.279	0	72.019	3	96	NaN	NaN	20.35	18.462	3
215	2009	10	30	7	20	56	734076	286	402	4	140	2.029	258	1.099	10	1	1	9	4.5	2.5	0.01	0	37	1	82	NaN	NaN	20.35	12.1	2
216	2009	10	30	7	27	48	734076	5	32	16	6	0.667	10	0.5	44	1	1	1	1	1	0.211	0	73.833	3	89	NaN	NaN	20.35	20.339	NaN
217	2009	10	30	7	29	4	734076	12.5	68	14	34	0.368	20	0.5	38	1	1	1	2.5	2.5	0.132	0	70.031	1	90.5	NaN	NaN	20.35	18.831	4
218	2009	10	30	7	30	50	734076	24.5	80	2	50	0.49	28	0.875	64	1	1	1	0	0	0.014	0	58.375	1	93.5	NaN	NaN	20.3	18	5
219	2009	10	30	7	33	14	734076	88	258	4	176	0.486	78	1.09	74	19	1	7	5.5	3	0.012	0	44.833	1	85.3	NaN	NaN	20.3	15.75	2
220	2009	10	30	7	38	46	734076	9	60	8	32	0.281	20	0.425	64	1	1	1	0.5	0.5	0.065	0	72.4	1	91	NaN	NaN	20.25	19.69	3
221	2009	10	30	7	40	50	734076	10.5	66	14	30	0.267	22	0.455	32	1	1	1	3	2.5	0.143	0	71.594	3	92.8	NaN	NaN	20.25	19.25	3
222	2009	10	30	7	42	28	734076	6.5	50	28	10	0.6	12	0.417	60	1	1	3	2	1.5	0.255	0	74.533	7	84.5	NaN	NaN	20.25	19.93	3
223	2009	10	30	7	44	18	734076	12.5	52	14	16	0.781	22	0.5	10	1	1	1	1.5	1.5	0.226	0	68.688	5	81.5	NaN	NaN	20.25	18.469	2
224	2009	10	30	7	45	20	734076	19.5	74	14	30	0.65	30	0.533	10	1	1	1	3.5	3.5	0.167	0	62	5	65.5	NaN	NaN	20.25	18.287	3
225	2009	10	30	7	46	44	734076	131.5	246	4	174	0.756	68	1.897	292	9	1	1	2.5	2.5	0.007	0	37.583	1	81.5	NaN	NaN	20.25	14.933	0
226	2009	10	30	7	55	42	734076	5.5	62	28	16	0.25	18	0.306	34	1	1	1	1.5	1.5	0.292	0	73.35	7	88.3	NaN	NaN	20.25	20.17	NaN
227	2009	10	30	7	57	18	734076	5.5	56	26	18	0.222	12	0.333	42	1	1	1	3	1.5	0.265	1	72	5	84.3	NaN	NaN	20.25	20.157	NaN
228	2009	10	30	7	58	56	734076	6.5	56	12	24	0.208	20	0.325	42	1	3	1	2.5	1.5	0.122	0	70.821	3	84.3	NaN	NaN	20.2	19.871	NaN
229	2009	10	30	8	0	34	734076	7	74	40	16	0.375	18	0.306	22	1	1	1	2.5	1.5	0.417	1	62.5	5	85.5	NaN	NaN	20.2	19.738	0
230	2009	10	30	8	2	10	734076	5.5	76	40	10	0.4	26	0.192	188	1	3	1	3	1.5	0.152	0	70.798	11	90.5	NaN	NaN	20.2	19.955	NaN
231	2009	10	30	8	6	34	734076	6.5	78	20	46	0.13	12	0.417	160	3	1	1	2	1.5	0.084	0	66.341	5	90.5	NaN	NaN	20.25	20.005	2
232	2009	10	30	8	10	32	734076	7.5	30	2	10	0.75	18	0.417	38	1	1	1	0	0	0.029	0	64.625	1	68.8	NaN	NaN	20.2	18.9	3
233	2009	10	30	8	11	40	734076	8	42	8	16	0.469	18	0.444	2	1	1	1	0.5	0.5	0.182	1	60.45	5	81.3	NaN	NaN	20.15	18.75	2
234	2009	10	30	8	12	24	734076	192.5	224	28	88	1.631	108	1.778	100	3	1	3	49.5	49	0.086	0	40.5	1	68.5	NaN	NaN	20.2	13.833	1
235	2009	10	30	8	17	48	734076	7.5	42	8	18	0.389	16	0.469	22	1	1	1	0.5	0.5	0.125	0	66.35	1	75.8	NaN	NaN	20.2	18.85	4
236	2009	10	30	8	18	52	734076	7.5	54	26	12	0.458	16	0.469	38	1	1	1	2	2	0.283	1	65.179	7	82	NaN	NaN	20.2	19.054	3
237	2009	10	30	8	20	24	734076	7	60	38	8	0.625	14	0.357	30	1	3	1	5	2	0.422	1	65.513	11	84	NaN	NaN	20.15	19.35	3
238	2009	10	30	8	21	54	734076	10.5	54	26	14	0.571	14	0.75	14	1	3	1	4.5	2.5	0.382	0	62.821	5	74	NaN	NaN	20.2	18.657	3
239	2009	10	30	8	23	2	734076	124.5	222	4	146	0.846	72	1.688	78	9	1	3	4	3	0.013	0	39.75	1	40.8	NaN	NaN	20.2	15.083	1
240	2009	10	30	8	28	2	734076	11	46	12	16	0.563	18	0.611	24	1	1	1	2	2	0.171	0	60.25	3	86	NaN	NaN	20.15	18.764	4
241	2009	10	30	8	29	12	734076	8	34	12	14	0.429	8	1	36	1	1	1	2	2	0.171	0	60.714	3	79.8	NaN	NaN	20.15	19.9	4
242	2009	10	30	8	30	22	734076	7	70	28	26	0.212	16	0.344	54	1	1	1	3	1.5	0.226	0	61.55	1	76.8	NaN	NaN	20.15	19.547	2
243	2009	10	30	8	32	26	734076	99	214	4	156	0.625	54	1.806	98	7	1	1	3	1.5	0.013	0	41.25	1	61.8	NaN	NaN	20.15	15.6	0
244	2009	10	30	8	37	38	734076	6	52	28	10	0.5	14	0.357	46	1	1	1	2	1	0.286	0	61.483	7	76.8	NaN	NaN	20.15	19.98	3
245	2009	10	30	8	39	16	734076	5	56	40	8	0.5	8	0.5	28	1	1	1	2	1	0.476	0	59.905	9	70.3	NaN	NaN	20.1	20.076	NaN
246	2009	10	30	8	40	40	734076	6.5	38	12	12	0.542	14	0.393	30	1	1	1	1	1	0.176	0	58.107	5	75	NaN	NaN	20.1	19.857	2
247	2009	10	30	8	41	48	734076	17	76	38	12	1.125	26	0.654	40	1	7	1	16.5	5.5	0.328	0	53.013	9	66.5	NaN	NaN	20.15	18.212	2
248	2009	10	30	8	43	44	734076	7	86	20	18	0.389	48	0.115	116	1	1	5	1.5	1.5	0.099	0	57.932	5	65.8	NaN	NaN	20.15	20.1	NaN
249	2009	10	30	8	47	6	734076	10	82	22	44	0.227	16	0.5	774	3	3	1	3	2	0.026	0	53.729	1	69	NaN	NaN	20.15	19.292	6
250	2009	10	30	9	1	22	734076	16	52	20	14	0.893	18	0.639	10	1	1	1	8	4.5	0.323	0	47.545	3	58.3	NaN	NaN	20.05	18.1	5
251	2009	10	30	9	2	24	734076	5.5	56	28	16	0.25	12	0.375	38	1	1	1	2.5	1.5	0.298	0	53.85	7	73	NaN	NaN	20.05	20.043	NaN
252	2009	10	30	9	3	58	734076	10.5	50	22	10	0.75	18	0.583	0	1	3	1	5	3	0.44	0	50.458	1	69.5	NaN	NaN	20.05	19.067	4
253	2009	10	30	9	4	48	734076	10.5	98	24	54	0.194	20	0.375	472	5	3	1	4	3	0.042	1	47.827	3	55.8	NaN	NaN	20.05	18.604	4
254	2009	10	30	9	14	18	734076	5	60	34	12	0.292	14	0.286	38	1	1	1	2.5	1.5	0.347	0	50.111	1	60.8	NaN	NaN	20.05	20.033	NaN
255	2009	10	30	9	15	56	734076	10.5	94	4	78	0.122	12	0.792	26	5	1	1	2	1	0.033	0	48.417	1	70.5	NaN	NaN	20.05	18.517	3
256	2009	10	30	9	17	56	734076	5	50	26	10	0.4	14	0.286	20	1	1	1	2	1	0.371	0	50.161	3	67	NaN	NaN	20	19.993	NaN
257	2009	10	30	9	19	6	734076	6.5	68	24	32	0.172	12	0.417	22	1	3	1	3.5	1.5	0.267	0	47.404	1	65.8	NaN	NaN	20	19.823	NaN
258	2009	10	30	9	20	36	734076	5	60	22	22	0.182	16	0.281	622	3	1	1	1.5	1	0.032	0	48.729	1	66	NaN	NaN	20.05	20	NaN
259	2009	10	30	9	31	58	734076	8.5	72	34	24	0.292	14	0.536	326	1	1	1	2.5	1.5	0.085	0	48.028	3	78.8	NaN	NaN	20.1	18.522	0
260	2009	10	30	9	38	36	734076	5	84	48	26	0.135	10	0.35	48	3	1	1	3	1.5	0.364	0	49.79	5	64	NaN	NaN	20.1	20.048	NaN
261	2009	10	30	9	40	48	734076	10.5	86	16	44	0.227	26	0.385	40	3	1	1	1	0.5	0.127	0	46.944	1	78.5	NaN	NaN	20.1	18.317	2
262	2009	10	30	9	42	54	734076	9	108	36	48	0.156	24	0.271	202	3	1	1	4	2.5	0.116	0	47.75	5	61	NaN	NaN	20.1	18.547	2
263	2009	10	30	9	48	4	734076	9.5	78	30	24	0.313	24	0.396	36	1	1	1	2	2	0.263	1	47.406	7	65.3	NaN	NaN	20.1	18.5	3
264	2009	10	30	9	49	58	734076	13	86	20	44	0.295	22	0.432	30	1	1	1	3.5	3.5	0.172	0	50.159	3	65.3	NaN	NaN	20.1	18.427	5
265	2009	10	30	9	51	54	734076	6	92	40	36	0.125	16	0.281	14	3	1	1	3	1.5	0.377	0	48.595	5	56.3	NaN	NaN	20.1	20.019	NaN
266	2009	10	30	9	53	40	734076	5	98	54	34	0.103	10	0.35	30	5	3	1	4	2	0.422	0	49.313	5	52.3	NaN	NaN	20.05	20.05	NaN
267	2009	10	30	9	55	48	734076	5.5	102	50	30	0.133	22	0.182	16	3	3	1	4	2	0.424	0	49.01	5	71	NaN	NaN	20.05	20.052	NaN
268	2009	10	30	9	57	46	734076	5.5	68	40	10	0.5	18	0.306	28	1	5	1	2.5	0.5	0.417	1	49.607	3	70	NaN	NaN	20.05	20.036	NaN
269	2009	10	30	9	59	22	734076	13	66	32	20	0.475	14	0.857	48	1	1	1	4.5	3.5	0.281	0	49.588	3	63.3	NaN	NaN	20.05	18.309	2
270	2009	10	30	10	1	16	734076	11	110	12	74	0.135	24	0.458	44	1	1	1	1	1	0.078	0	45.893	1	53.5	NaN	NaN	20.05	18.236	2
271	2009	10	30	10	3	50	734076	8	90	34	36	0.167	20	0.325	42	1	1	1	3.5	2	0.258	0	46.208	3	60.3	NaN	NaN	20.05	19.036	3
272	2009	10	30	10	6	2	734076	5.5	82	44	22	0.182	16	0.313	26	1	3	1	3	1.5	0.407	0	48.011	3	58.5	NaN	NaN	20.05	19.933	NaN
273	2009	10	30	10	7	50	734076	6.5	92	42	12	0.542	38	0.132	132	1	3	1	3.5	2	0.188	0	48.239	1	69.8	NaN	NaN	20.05	19.625	3
274	2009	10	30	10	11	34	734076	9	82	20	36	0.194	26	0.346	40	1	1	1	2	2	0.164	0	46.045	1	70.8	NaN	NaN	20	18.718	4
275	2009	10	30	10	13	36	734076	9	88	16	42	0.19	30	0.25	118	3	1	1	2.5	1.5	0.078	1	46.833	5	64.8	NaN	NaN	20	18.689	4
276	2009	10	30	10	17	2	734076	9	96	30	48	0.167	18	0.389	126	3	1	1	3	2	0.135	1	47	3	67.8	NaN	NaN	20	18.612	3
277	2009	10	30	10	20	44	734076	7.5	82	32	26	0.231	24	0.292	158	3	3	1	3	2	0.133	0	46.044	3	47	NaN	NaN	20	19.65	NaN
278	2009	10	30	10	24	44	734076	6	64	18	20	0.25	26	0.192	358	1	1	1	2	1	0.043	0	47.825	1	56	NaN	NaN	19.95	19.89	2
279	2009	10	30	10	31	46	734076	6.5	92	48	16	0.344	28	0.196	146	1	3	1	3	1.5	0.202	1	44.4	5	69.3	NaN	NaN	19.95	19.82	NaN
280	2009	10	30	10	35	44	734076	5	68	30	24	0.167	14	0.286	20	3	1	1	2	1	0.341	0	45.594	3	73	NaN	NaN	19.9	19.947	NaN
281	2009	10	30	10	37	12	734076	12.5	116	16	58	0.216	42	0.214	16	1	3	1	4.5	3.5	0.121	0	48.667	1	44	NaN	NaN	19.9	18.472	5
282	2009	10	30	10	39	24	734076	5.5	86	44	14	0.286	28	0.143	2	1	1	3	3	1.5	0.5	0	48.293	7	70.3	NaN	NaN	19.9	19.9	NaN
283	2009	10	30	10	40	52	734076	5	38	10	10	0.35	18	0.278	32	1	1	3	1.5	1.5	0.143	1	48.708	3	63.5	NaN	NaN	19.9	19.883	NaN
284	2009	10	30	10	42	2	734076	235.5	300	30	144	1.587	126	1.865	168	7	3	1	9.5	7	0.064	0	35.688	1	64.8	NaN	NaN	19.9	13.216	1
285	2009	10	30	10	49	50	734076	7.5	50	20	18	0.333	12	0.542	40	1	1	1	2.5	1.5	0.222	0	64.727	3	76.8	NaN	NaN	19.85	18.818	2
286	2009	10	30	10	51	20	734076	13	68	10	34	0.382	24	0.5	58	1	1	1	1	1	0.079	0	61.625	1	76.3	NaN	NaN	19.85	18.308	1
287	2009	10	30	10	53	26	734076	16.5	114	24	50	0.25	40	0.412	44	1	1	1	4	4	0.152	0	67.769	3	82.5	NaN	NaN	19.8	18.042	0
288	2009	10	30	10	56	4	734076	17	108	22	46	0.348	40	0.3	40	1	1	1	6	5	0.149	1	73.125	3	86	NaN	NaN	19.85	17.979	2
289	2009	10	30	10	58	32	734076	10.5	102	60	24	0.354	18	0.583	52	1	5	1	5	2	0.39	0	80.887	19	90	NaN	NaN	19.8	18.373	1
290	2009	10	30	11	1	6	734076	24.5	170	46	90	0.239	34	0.721	54	5	5	1	10	4	0.205	0	78.688	11	94	NaN	NaN	19.8	17.269	1
291	2009	10	30	11	4	50	734076	221.5	286	28	114	1.921	144	1.538	80	3	5	3	5.5	3	0.077	0	39.017	1	102.8	NaN	NaN	19.75	13.1	1
292	2009	10	30	11	10	56	734076	26.5	102	24	30	0.75	48	0.542	62	1	1	1	4.5	4	0.146	0	99.231	7	118.5	NaN	NaN	19.7	17.315	0
293	2009	10	30	11	13	40	734076	52	206	130	40	1.138	36	1.167	38	1	9	1	63.5	20.5	0.533	0	93.489	41	121.3	NaN	NaN	19.7	16.507	1
294	2009	10	30	11	17	44	734076	66	220	144	32	1.5	44	1.307	46	1	15	1	107.5	26.5	0.541	0	94.877	31	131.8	NaN	NaN	19.65	16.336	3
295	2009	10	30	11	22	10	734076	93.5	290	162	42	1.571	86	0.953	40	1	11	1	126	34	0.491	0	100.189	33	138	NaN	NaN	19.6	15.563	3
296	2009	10	30	11	27	40	734076	211	384	114	128	1.645	142	1.468	84	1	17	5	15	4	0.244	0	67.03	23	129	NaN	NaN	19.6	13.324	0
297	2009	10	30	11	35	28	734076	202.5	344	96	130	1.558	118	1.716	60	1	11	1	24	7	0.238	1	82.061	17	163	NaN	NaN	19.5	13.351	3
298	2009	10	30	11	42	12	734076	19	118	52	46	0.348	20	0.7	86	1	3	1	9	5	0.255	0	163.889	9	NaN	NaN	-2.6	19.4	17.781	5
299	2009	10	30	11	45	36	734076	140.5	326	136	94	1.495	96	1.245	74	1	11	1	34	25	0.34	0	116.384	37	177.3	NaN	NaN	19.4	14.351	3
300	2009	10	30	11	52	16	734076	16	128	62	44	0.273	22	0.545	78	1	5	1	11	4	0.301	0	174	13	NaN	NaN	-10.9	19.35	17.864	1
301	2009	10	30	11	55	42	734076	25.5	164	36	82	0.293	46	0.522	46	1	5	1	5	2	0.171	0	169.316	9	NaN	NaN	4.9	19.4	17.142	3
302	2009	10	30	11	59	12	734076	94	330	166	72	1.306	92	1	40	1	9	3	11	4.5	0.449	0	136.313	33	180.2	-0.299	12.6	19.4	15.17	1
303	2009	10	30	12	5	22	734077	11	120	54	40	0.212	26	0.346	120	1	5	1	6.5	2.5	0.225	0	183.196	15	NaN	NaN	0	19.35	18.252	1
304	2009	10	30	12	9	22	734077	13	114	42	44	0.216	28	0.393	36	1	1	1	5.5	3.5	0.28	0	183.58	7	191.5	NaN	NaN	19.3	18.12	0
305	2009	10	30	12	11	52	734077	11	114	52	30	0.267	32	0.281	90	1	3	3	6	3	0.255	0	187.546	17	NaN	NaN	-1	19.25	18.243	5
306	2009	10	30	12	15	16	734077	90.5	248	76	92	0.984	80	1.056	52	1	1	1	6	6	0.253	0	144.474	17	NaN	NaN	-1.4	19.3	15.385	0
307	2009	10	30	12	20	16	734077	13.5	124	54	48	0.208	22	0.5	42	3	1	1	6	3.5	0.325	0	186.563	17	NaN	NaN	-13.7	19.35	18.359	6
308	2009	10	30	12	23	2	734077	12	116	48	44	0.193	24	0.5	46	1	5	1	5.5	3.5	0.296	0	188.14	17	192	NaN	NaN	19.3	18.132	4
309	2009	10	30	12	25	44	734077	15	114	38	46	0.228	30	0.5	32	1	3	1	5.5	4.5	0.26	0	186.713	11	166	NaN	NaN	19.25	18.275	2
310	2009	10	30	12	28	10	734077	15	114	46	42	0.25	26	0.442	182	1	3	1	10	4.5	0.155	1	186.573	11	NaN	NaN	-7.5	19.3	18.098	3
311	2009	10	30	12	33	6	734077	11	92	22	42	0.214	28	0.393	80	1	1	1	2	2	0.128	0	190.896	7	164.5	NaN	NaN	19.2	18.221	4
312	2009	10	30	12	35	58	734077	11.5	100	32	50	0.21	18	0.556	612	1	3	1	3.5	2	0.045	1	191.794	9	193.8	NaN	NaN	19.1	18.009	0
313	2009	10	30	12	47	50	734077	7.5	84	40	26	0.212	18	0.361	112	1	1	1	3	2	0.204	0	199.595	11	201.8	NaN	NaN	18.9	18.357	0
314	2009	10	30	12	51	6	734077	8.5	66	26	22	0.295	18	0.389	88	1	5	1	5.5	2.5	0.169	0	197.5	7	219.3	NaN	NaN	19	18.911	0
315	2009	10	30	12	53	40	734077	10.5	82	10	40	0.25	32	0.313	72	1	1	1	1	0.5	0.065	0	195.25	3	214	NaN	NaN	19.85	18.692	0
316	2009	10	30	12	56	14	734077	7.5	74	30	28	0.214	16	0.375	190	1	1	1	3	1.5	0.114	0	200.047	11	217	NaN	NaN	20	18.847	0
317	2009	10	30	13	0	38	734077	8.5	78	28	28	0.214	22	0.386	218	1	3	1	3.5	2.5	0.095	0	199.133	9	206.5	NaN	NaN	19.85	18.317	1
318	2009	10	30	13	5	34	734077	10.5	80	30	32	0.266	18	0.5	72	1	1	1	3.5	2	0.197	0	199.563	13	217.8	NaN	NaN	19.85	18.659	0
319	2009	10	30	13	8	6	734077	15.5	92	18	42	0.321	32	0.469	42	1	5	1	4.5	2	0.134	0	193.075	3	213.8	NaN	NaN	19.8	18.445	1
320	2009	10	30	13	10	20	734077	5.5	68	52	8	0.5	8	0.5	62	1	3	1	4	2	0.4	0	195.667	15	221.5	NaN	NaN	19.7	19.485	NaN
321	2009	10	30	13	12	30	734077	13.5	86	24	44	0.284	18	0.583	50	1	1	1	4	3	0.176	0	198.192	9	205.3	NaN	NaN	19.65	18.431	0
322	2009	10	30	13	14	46	734077	32	174	110	34	0.941	30	0.75	38	1	11	1	14.5	10	0.519	0	188.857	35	NaN	NaN	-17.1	19.45	17.375	0
323	2009	10	30	13	18	18	734077	16.5	142	78	22	0.75	42	0.286	90	1	3	1	6.5	4.5	0.336	0	195.194	23	NaN	NaN	-16.4	19.45	18.071	0
324	2009	10	30	13	22	10	734077	10	110	52	42	0.179	16	0.594	26	3	7	1	7	2.5	0.382	0	199.824	15	214	NaN	NaN	19.1	18.663	0
325	2009	10	30	13	24	26	734077	8.5	98	56	14	0.571	28	0.214	9028	1	5	1	5	2.5	0.006	0	201.767	21	209.5	NaN	NaN	18.9	18.221	NaN
326	2009	10	30	15	56	32	734077	5.5	100	68	24	0.167	8	0.5	12	5	3	1	6	1.5	0.607	0	217.429	21	224.5	NaN	NaN	18.6	18.424	0
327	2009	10	30	15	58	24	734077	13	94	54	18	0.528	22	0.523	3880	1	3	1	6	3.5	0.014	0	211.33	17	NaN	NaN	-28.3	18.9	17.841	1
328	2009	10	30	17	4	38	734077	13	144	98	24	0.396	22	0.568	106	1	1	1	4	3.5	0.392	1	209.9	27	222.7	-0.862	11.6	19.4	17.51	0
329	2009	10	30	17	8	48	734077	16	176	126	30	0.5	20	0.65	34	1	11	1	15	3	0.6	0	213.281	35	NaN	NaN	5.8	19.05	17.206	0
330	2009	10	30	17	12	18	734077	8	84	58	18	0.444	8	0.875	16	1	5	1	5	2	0.58	0	219.967	21	223	NaN	NaN	18.5	17.56	0
331	2009	10	30	17	13	58	734077	6.5	62	44	10	0.55	8	0.75	14	1	3	1	2.5	1	0.579	0	218.804	15	223.8	NaN	NaN	18.75	17.726	0
332	2009	10	30	17	15	14	734077	5.5	54	20	26	0.212	8	0.563	72300	1	3	1	2	1	0	0	219.659	7	225	NaN	NaN	18.9	18.15	0
333	2009	10	31	13	21	8	734078	6	40	0	18	0.333	22	0.273	3152	1	1	1	0	0	0	1	176.25	1	179.8	NaN	NaN	29.05	29.1	NaN
334	2009	10	31	14	14	20	734078	6	140	96	36	0.139	8	0.75	34	1	7	1	6	2.5	0.552	1	207.224	27	216.3	NaN	NaN	21.55	21.563	1
335	2009	10	31	14	17	14	734078	11.5	246	194	38	0.224	14	0.714	40	3	17	1	14.5	4	0.678	0	202.25	53	NaN	NaN	5	21.55	21.288	0
336	2009	10	31	14	21	60	734078	31	278	56	186	0.129	36	0.861	200	11	3	1	8	7	0.117	0	189.733	13	214	NaN	NaN	21.65	20.231	0
337	2009	10	31	14	29	58	734078	9.5	108	32	50	0.15	26	0.346	94	3	3	1	3.5	2	0.158	0	203.735	9	207.5	NaN	NaN	21.8	21.197	0
338	2009	10	31	14	33	20	734078	8	98	32	44	0.159	22	0.341	42	1	3	1	2.5	1	0.229	0	206.456	9	212.8	NaN	NaN	22.1	21.209	0
339	2009	10	31	14	35	40	734078	113.5	320	120	94	0.957	106	1.071	326	1	1	1	23.5	23.5	0.186	0	144.373	29	NaN	NaN	-8.3	22.2	16.004	0
340	2009	10	31	14	46	26	734078	25.5	118	56	50	0.36	12	2.042	40	1	1	1	8.5	7.5	0.354	0	192.353	13	208.7	-1.608	7.1	21.9	20.083	0
341	2009	10	31	14	49	4	734078	38	210	78	88	0.386	44	0.614	38	3	1	1	15	11	0.315	0	184.113	15	216.6	-0.386	6.7	22.75	18.354	1
342	2009	10	31	14	53	12	734078	29	194	102	52	0.452	40	0.662	40	1	7	1	12	5.5	0.436	0	189.279	27	NaN	NaN	-2.7	23.15	19.183	0
343	2009	10	31	14	57	6	734078	37	208	80	78	0.455	50	0.62	56	1	5	1	9.5	6	0.303	0	190.933	21	NaN	NaN	-5.2	23.5	19.349	0
344	2009	10	31	15	1	30	734078	41.5	226	100	78	0.462	48	0.635	56	1	3	1	17.5	11	0.355	0	184.515	21	NaN	NaN	-3.9	23.6	17.447	0
345	2009	10	31	15	6	12	734078	38	226	104	72	0.479	50	0.64	50	1	1	1	9.5	6	0.377	1	186.274	29	NaN	NaN	-4	23.55	17.21	0
346	2009	10	31	15	10	48	734078	182	400	96	128	1.359	176	1.034	58	1	5	1	10	8	0.21	0	123.199	25	NaN	NaN	-1.7	23.65	13.75	0
347	2009	10	31	15	18	26	734078	15	134	36	66	0.174	32	0.422	122	3	1	1	5	3.5	0.141	0	200.684	7	187.8	NaN	NaN	23.65	20.976	0
348	2009	10	31	15	22	42	734078	244	454	138	154	1.523	162	1.472	36	1	9	3	37.5	10	0.282	0	102.807	23	NaN	NaN	4.3	23.7	13.229	2
349	2009	10	31	15	30	52	734078	25.5	152	32	92	0.272	28	0.768	40	5	1	1	4.5	4	0.167	0	193.912	7	216	NaN	NaN	23.65	19.329	0
350	2009	10	31	15	34	4	734078	29.5	154	46	52	0.471	56	0.491	44	1	3	1	8	5	0.232	0	194.417	13	NaN	NaN	-1.9	23.65	17.958	0
351	2009	10	31	15	37	22	734078	386	536	98	202	1.77	236	1.636	64	1	1	1	28	28	0.163	0	56.265	1	NaN	NaN	5	23.75	10.104	0
352	2009	10	31	15	47	22	734078	24	188	94	66	0.273	28	0.607	50	3	1	1	13	7	0.395	0	197.495	25	NaN	NaN	-0.1	23.75	19.854	0
353	2009	10	31	15	51	20	734078	21.5	176	92	40	0.388	44	0.42	104	1	3	1	10	6	0.329	0	200.559	23	NaN	NaN	5.2	23.8	19.237	0
354	2009	10	31	15	56	0	734078	16	130	64	40	0.325	26	0.462	36	3	5	1	10	4	0.386	0	208.795	21	NaN	NaN	2.3	23.85	20.455	0
355	2009	10	31	15	58	46	734078	18	144	54	42	0.321	48	0.313	22	1	3	3	8.5	4.5	0.325	0	205.125	17	NaN	NaN	-4.8	23.85	20.348	1
356	2009	10	31	16	1	32	734078	21	144	68	36	0.417	40	0.412	22	1	3	3	12.5	6	0.41	0	206.436	23	232.5	-0.267	6	23.85	20.789	2
357	2009	10	31	16	4	18	734078	15	124	66	34	0.338	24	0.479	110	3	3	1	9	3.5	0.282	0	209.412	19	NaN	NaN	-6.1	23.8	20.784	0
358	2009	10	31	16	8	12	734078	13	110	58	28	0.375	24	0.438	144	1	3	1	6	2.5	0.228	0	211.175	11	218.6	-1.46	10.2	23.85	20.895	0
359	2009	10	31	16	12	26	734078	18.5	124	64	32	0.406	28	0.5	32	1	3	1	11	5.5	0.41	0	205.394	15	NaN	NaN	3.2	23.75	20.692	0
360	2009	10	31	16	15	2	734078	16.5	104	38	42	0.369	24	0.521	30	1	3	1	6	4	0.284	0	206.537	9	NaN	NaN	-11.2	23.7	20.612	0
361	2009	10	31	16	17	16	734078	6.5	74	36	24	0.25	14	0.357	28	1	1	1	2	1.5	0.353	0	211.724	11	215.5	NaN	NaN	23.5	21.545	0
362	2009	10	31	16	18	58	734078	18	114	38	36	0.389	40	0.425	196	1	1	1	5	4	0.123	0	204.85	11	NaN	NaN	1.9	23.75	20.167	0
363	2009	10	31	16	24	8	734078	22	134	54	34	0.485	46	0.424	30	1	3	1	10	5.5	0.329	0	201.652	11	NaN	NaN	1.3	23.45	19.605	0
364	2009	10	31	16	26	52	734078	8.5	82	34	32	0.234	16	0.406	106	3	3	1	4	2	0.181	0	210.458	7	213.5	NaN	NaN	23.45	21.794	0
365	2009	10	31	16	30	0	734078	25	134	48	52	0.481	34	0.515	42	1	1	1	7.5	7.5	0.273	0	199.52	5	216.6	-1.109	12.6	23.25	19.606	0
366	2009	10	31	16	32	56	734078	19	112	38	46	0.391	28	0.571	108	1	5	1	6	3	0.173	0	201.787	9	212.4	-1.815	7.9	23.05	20.25	0
367	2009	10	31	16	36	36	734078	20	146	52	58	0.345	36	0.458	64	3	1	3	3.5	3.5	0.248	1	202.611	11	NaN	NaN	-12.8	23.05	19.87	2
368	2009	10	31	16	40	6	734078	33.5	170	56	60	0.433	54	0.565	460	1	1	1	10.5	7.5	0.089	0	194.776	13	NaN	NaN	3.6	23.05	18.379	0
369	2009	10	31	16	50	36	734078	23.5	112	40	36	0.542	36	0.556	214	1	1	1	7.5	4	0.123	0	200.774	7	NaN	NaN	1.1	23	20.052	0
370	2009	10	31	16	56	2	734078	25.5	124	26	52	0.471	46	0.522	32	1	1	1	2.5	1.5	0.167	1	199.589	7	NaN	NaN	-9.4	22.9	20.307	0
371	2009	10	31	16	58	38	734078	15.5	114	40	50	0.22	24	0.479	26	1	1	1	8.5	4.5	0.286	0	208.952	9	213.8	NaN	NaN	22.65	20.533	0
372	2009	10	31	17	0	58	734078	65	158	8	66	0.985	84	0.774	56	1	1	1	0	0	0.037	0	176.2	1	225	NaN	NaN	22.55	16.25	0
373	2009	10	31	17	4	32	734078	77	272	12	158	0.484	102	0.755	56	5	1	1	0.5	0.5	0.037	0	168.929	3	NaN	NaN	4	22.45	16.2	0
374	2009	10	31	17	10	0	734078	394	644	314	192	2.044	138	2.025	208	1	15	1	136	117.5	0.369	0	51.786	31	NaN	NaN	4.4	21.2	10.481	0
375	2009	10	31	17	24	12	734078	370.5	508	130	194	1.907	184	2.005	78	1	15	1	23	5	0.222	1	57.159	15	157.4	0.284	10.1	21.5	10.656	0
376	2009	10	31	17	33	58	734078	5.5	28	14	6	0.667	8	0.688	24	1	3	1	2.5	2	0.269	0	193.438	7	219	NaN	NaN	22.35	21.119	NaN
377	2009	10	31	17	34	50	734078	8.5	56	30	12	0.5	14	0.536	90	1	1	1	3.5	2.5	0.205	0	211.234	11	219.5	NaN	NaN	22.5	20.759	0
378	2009	10	31	17	37	16	734078	357.5	472	106	190	1.879	176	2.02	224	1	13	1	19.5	4.5	0.152	0	63.838	17	NaN	NaN	3.1	22.7	10.758	0
379	2009	10	31	17	48	52	734078	355.5	490	126	186	1.909	178	1.994	170	1	9	1	13	3.5	0.191	1	64.055	13	NaN	NaN	3.7	22.45	10.866	2
380	2009	10	31	17	59	52	734078	355.5	502	150	174	2.037	178	1.994	188	3	13	1	18	3.5	0.217	1	64.977	27	187.5	-0.783	6.1	22.65	10.794	0
381	2009	10	31	18	11	22	734078	350.5	470	138	164	2.119	168	2.083	198	1	9	1	22.5	4	0.207	1	64.246	21	163.7	0.257	7.9	22.7	10.781	0
382	2009	10	31	18	22	30	734078	348	462	142	172	2.02	148	2.111	210	5	19	1	65	35.5	0.211	1	67.58	21	NaN	NaN	3	22.35	10.911	0
383	2009	10	31	18	33	42	734078	344	476	130	170	2.024	176	1.935	232	1	9	3	19.5	6.5	0.184	1	67.303	17	NaN	NaN	4.8	22.4	10.978	1
384	2009	10	31	18	45	30	734078	337	450	118	168	1.994	164	2.055	208	1	9	1	11	4	0.179	1	65.354	27	171.8	0.46	8	23.1	10.983	0
385	2009	10	31	18	56	28	734078	336.5	456	122	162	2.065	172	1.951	218	1	15	1	27	4	0.181	1	66.968	21	198.8	-0.671	7.2	21.7	11.125	0
386	2009	10	31	19	7	42	734078	334	456	126	158	2.108	172	1.936	242	1	19	3	25.5	3.5	0.181	1	67.781	23	NaN	NaN	2.9	21.2	11.118	2
387	2009	10	31	19	19	20	734078	336	460	122	164	2.024	174	1.928	242	1	13	3	20.5	4.5	0.174	1	66.379	21	NaN	NaN	4.6	22.2	11.095	1
388	2009	10	31	19	31	2	734078	341.5	446	98	174	1.931	174	1.922	260	1	11	3	25.5	7	0.139	1	64.075	15	178.7	1.483	7	22.9	11.096	0
389	2009	10	31	19	42	48	734078	353.5	480	118	174	2	188	1.88	92	1	11	3	24	5.5	0.206	1	58.854	11	193.6	-0.655	8.3	22.9	10.733	1
390	2009	10	31	19	52	20	734078	5.5	40	8	20	0.225	12	0.458	26	3	1	1	1	1	0.121	0	210.75	3	224.3	NaN	NaN	22.7	21.45	2
391	2009	10	31	19	53	26	734078	5.5	50	20	20	0.2	10	0.5	140	1	3	1	3	1.5	0.105	1	205.909	7	220.3	NaN	NaN	22.75	21.223	0
392	2009	10	31	19	56	36	734078	362.5	438	96	184	1.946	158	1.927	284	1	5	1	102.5	72.5	0.133	0	63.551	13	NaN	NaN	2.7	22.85	11.296	0
393	2009	10	31	20	8	38	734078	356.5	484	122	188	1.886	174	1.989	258	1	11	3	26.5	10.5	0.164	1	60.093	11	NaN	NaN	5.5	22.65	10.887	0
394	2009	10	31	20	21	0	734078	324.5	490	130	176	1.844	184	1.742	160	1	13	5	13	5.5	0.2	1	64.125	23	204.5	-0.29	9.2	22.55	10.99	2
395	2009	10	31	20	31	50	734078	331	466	130	158	2.073	178	1.86	194	1	7	1	8.5	4	0.197	1	65.572	19	170.9	0.338	6.5	22.75	10.795	0
396	2009	10	31	20	42	50	734078	339	480	146	168	2	166	2	182	1	11	3	19	7.5	0.221	1	63.963	27	216.5	-0.227	8	22.6	10.893	2
397	2009	10	31	20	53	52	734078	357	478	134	172	2.055	172	1.968	174	1	11	3	35.5	20.5	0.206	1	58.478	21	183.3	-8.758	6.6	22.45	10.965	0
398	2009	10	31	21	4	44	734078	328	468	114	154	2.127	200	1.625	118	1	7	7	8.5	4.5	0.195	1	64.81	21	NaN	NaN	5.1	22.6	11.146	1
399	2009	10	31	21	14	30	734078	320.5	474	158	152	2.105	164	1.936	164	1	9	3	13.5	6.5	0.248	1	66.634	31	229.6	-0.151	8.7	22.85	10.961	0
400	2009	10	31	21	25	8	734078	329	434	110	162	2.009	162	2.028	178	1	11	1	13	3.5	0.18	1	60.781	13	190.7	-1.775	6.3	22.85	10.996	0
401	2009	10	31	21	35	20	734078	371	480	154	158	2.095	168	2.018	228	1	7	1	81.5	43	0.218	0	50.135	9	198.7	-0.506	9.7	22.85	10.947	0
402	2009	10	31	21	47	8	734078	332.5	430	114	158	2.104	158	1.794	262	1	13	3	71	51.5	0.165	0	57.754	15	198.6	-0.46	9.1	22.95	11.093	2
403	2009	10	31	21	58	40	734078	330	430	92	168	1.94	170	1.938	246	1	9	1	15.5	4	0.136	1	58.234	9	212.6	-0.236	10	22.95	11.102	0
404	2009	10	31	22	9	56	734078	329.5	418	88	162	2.031	168	1.961	202	1	11	1	11.5	2	0.142	1	56.589	11	171.5	1.138	12.3	23.05	11.121	0
405	2009	10	31	22	20	16	734078	328.5	422	92	160	2.047	170	1.918	174	1	11	3	12.5	3	0.154	1	56.303	11	199.3	-0.302	8.5	23	11.099	1
406	2009	10	31	22	30	12	734078	330.5	418	96	156	2.099	166	1.988	222	1	11	1	15.5	3.5	0.15	1	54.061	17	198	-0.3	7.1	23.05	11.093	0
407	2009	10	31	22	40	52	734078	332	484	154	158	2.073	172	1.904	98	1	3	1	12	5	0.265	1	51.907	15	186.8	-0.457	8.4	22.95	11.1	2
408	2009	10	31	22	50	34	734078	10.5	78	34	28	0.268	16	0.5	138	1	1	1	5.5	3	0.157	0	190.319	11	211.3	NaN	NaN	22.9	21.539	7
409	2009	10	31	22	54	10	734078	292	414	90	158	1.81	166	1.759	90	1	9	5	24	6	0.179	0	64.957	15	179.3	-0.897	14.9	22.9	11.135	0
410	2009	10	31	23	2	34	734078	155.5	314	186	70	2.079	58	1.905	66	1	23	1	79	45	0.489	0	104.152	67	163.1	0.905	10.8	22.8	14.268	0
411	2009	10	31	23	8	54	734078	129	306	174	62	1.871	70	1.407	56	1	25	1	71.5	31	0.481	0	109.46	57	168.6	3.105	10.4	22.8	14.947	2
412	2009	10	31	23	14	56	734078	115	220	104	52	1.875	64	1.781	40	1	23	1	58.5	25	0.4	0	107.741	37	176.9	-0.711	7.3	22.95	15.672	0
413	2009	10	31	23	19	16	734078	112.5	280	150	64	1.727	66	1.303	54	1	19	1	54.5	26.5	0.449	1	109.901	47	180.3	-0.498	10.1	22.55	15.507	0
414	2009	10	31	23	24	50	734078	104.5	276	170	46	2.065	60	1.25	48	1	25	5	81	29.5	0.525	1	114.913	55	179.4	-0.386	8.2	22.45	15.766	2
415	2009	10	31	23	30	14	734078	91	206	128	42	2.119	36	1.931	40	1	21	1	40.5	22	0.52	0	112.931	43	157.6	-21.102	6.3	22.6	16.15	0
416	2009	10	31	23	34	20	734078	89	230	144	42	2.06	44	1.682	40	1	25	1	44.5	17	0.533	1	111.394	51	NaN	NaN	5.7	22.75	16.059	1
417	2009	10	31	23	38	50	734078	88.5	266	182	44	1.818	40	1.825	54	1	31	1	72	15.5	0.569	1	108.084	63	167.4	-0.54	9	22.7	16.047	0
418	2009	10	31	23	44	10	734078	79.5	208	130	30	2.017	48	1.438	42	1	17	3	50.5	19	0.52	0	108.811	41	157.7	-0.947	8.5	22.75	16.153	2
419	2009	10	31	23	48	20	734078	59.5	182	124	26	2.038	32	1.641	26	1	21	1	48.5	13.5	0.596	0	115.278	47	139.8	NaN	NaN	22.6	16.657	0
420	2009	10	31	23	51	48	734078	60.5	160	102	30	1.617	28	1.768	32	1	13	1	42	15.5	0.531	1	109.813	41	170.8	NaN	NaN	22.75	16.572	0
421	2009	10	31	23	55	0	734078	53	212	142	46	0.978	24	1.875	32	7	17	1	36	8.5	0.582	0	106.462	49	145.3	NaN	NaN	22.7	17.292	1
422	2009	10	31	23	59	4	734078	47.5	142	4	30	1.533	108	0.426	16	1	1	13	3	1.5	0.025	0	110.5	1	163.5	NaN	NaN	22.9	17.333	1
423	2009	11	1	0	1	42	734078	39.5	174	126	30	1.317	18	1.722	26	1	21	1	42.5	13.5	0.63	0	104.555	41	155.8	NaN	NaN	22.85	19.063	0
424	2009	11	1	0	5	2	734078	39.5	122	74	18	1.694	30	1.317	24	1	5	1	33	14	0.507	1	101.566	23	140.8	NaN	NaN	23.15	19.313	1
425	2009	11	1	0	7	28	734078	33	166	58	24	1.25	84	0.286	24	3	11	11	19	9	0.305	0	96.325	23	135.3	NaN	NaN	23	19.653	0
426	2009	11	1	0	10	38	734078	33.5	104	22	20	1.675	62	0.427	22	1	1	5	7	7	0.175	1	86.875	9	135.3	NaN	NaN	23.1	19.387	2
427	2009	11	1	0	12	44	734078	38	118	62	24	1.583	32	0.938	148	1	5	1	37	16	0.233	0	90.977	13	91.5	NaN	NaN	23.1	18.778	3
428	2009	11	1	0	17	10	734078	185	324	4	220	0.832	100	1.81	108	3	1	1	6	4	0.009	0	41.833	1	88.5	NaN	NaN	23.15	13.8	1
429	2009	11	1	0	24	22	734078	253.5	280	44	106	2.368	130	1.927	276	3	9	1	18.5	5.5	0.079	0	40.141	3	79.5	NaN	NaN	23.25	12.757	3
430	2009	11	1	0	33	38	734078	35	92	8	30	1.167	54	0.639	40	1	1	1	0.5	0.5	0.061	0	65.65	1	103.3	NaN	NaN	23.1	18.45	0
431	2009	11	1	0	35	50	734078	50	136	32	36	1.056	68	0.735	102	1	1	1	12	12	0.134	0	58.441	3	95.8	NaN	NaN	23.05	17.547	3
432	2009	11	1	0	39	48	734078	32	152	106	20	1.275	26	1.173	38	1	9	1	41	12	0.558	0	68.907	21	83.5	NaN	NaN	23.05	20.35	2
433	2009	11	1	0	42	58	734078	31.5	136	64	22	1.386	50	0.56	26	1	3	1	14.5	8.5	0.395	1	73.333	11	74.8	NaN	NaN	23.1	19.144	0
434	2009	11	1	0	45	40	734078	35.5	174	102	30	1.117	42	0.75	30	1	7	1	26	11.5	0.5	0	69.572	13	97.3	NaN	NaN	23.1	18.504	4
435	2009	11	1	0	49	4	734078	29	168	110	24	1.208	34	0.662	246	1	9	3	12.5	6.5	0.266	0	75.696	25	76	NaN	NaN	23.1	19.633	3
436	2009	11	1	0	55	58	734078	52.5	196	24	68	0.772	104	0.466	48	1	3	5	5	4	0.098	0	58.731	3	70.5	NaN	NaN	23.25	16.731	4
437	2009	11	1	1	0	2	734078	49	246	172	38	1.013	36	0.958	88	1	13	3	69	17	0.515	1	65.649	31	84.3	NaN	NaN	23.3	17.675	0
438	2009	11	1	1	5	36	734078	141	250	10	158	0.892	82	1.707	100	7	3	1	3	2	0.029	0	39.958	1	89	NaN	NaN	23.25	14.05	0
439	2009	11	1	1	11	26	734078	35.5	172	94	30	1.05	48	0.688	24	1	7	1	10.5	4	0.48	0	70.51	19	98.5	NaN	NaN	23.2	18.746	3
440	2009	11	1	1	14	42	734078	39	124	60	32	1.047	32	1.219	36	1	5	3	11.5	6.5	0.375	1	71.056	11	104	NaN	NaN	23.2	18.671	1
441	2009	11	1	1	17	22	734078	34	188	118	28	1.196	42	0.631	28	1	5	3	11	7.5	0.546	0	73.521	21	103	NaN	NaN	23.3	18.582	3
442	2009	11	1	1	20	58	734078	35.5	210	136	38	0.855	36	0.917	48	1	7	1	33.5	12	0.527	1	72.587	31	94.3	NaN	NaN	23.35	18.089	0
443	2009	11	1	1	25	16	734078	51.5	216	60	90	0.411	66	0.78	82	3	1	1	14.5	14.5	0.201	0	66.935	5	99.8	NaN	NaN	23.35	17.516	0
444	2009	11	1	1	30	14	734078	37	224	150	32	0.891	42	0.774	80	1	5	1	15	8.5	0.493	0	72.444	31	74	NaN	NaN	23.4	18.376	2
445	2009	11	1	1	35	18	734078	30	222	152	28	0.929	42	0.714	58	1	13	3	18	5	0.543	0	74.808	35	95.3	NaN	NaN	23.3	18.928	1
446	2009	11	1	1	39	58	734078	60	236	6	110	0.545	120	0.496	112	1	1	1	0.5	0.5	0.017	0	56.938	3	95	NaN	NaN	23.4	16.537	2
447	2009	11	1	1	45	46	734078	31	196	128	34	0.912	34	0.706	70	1	9	1	16	9.5	0.481	0	75.538	27	87	NaN	NaN	23.5	19.524	2
448	2009	11	1	1	50	12	734078	32.5	200	138	34	0.735	28	0.821	62	1	7	1	25	9.5	0.527	1	74.3	25	94.8	NaN	NaN	23.45	19.389	1
449	2009	11	1	1	54	34	734078	39.5	206	112	40	0.7	54	0.685	140	1	5	1	16	11.5	0.324	0	70.325	19	94.8	NaN	NaN	23.45	18.119	4
450	2009	11	1	2	0	20	734078	312.5	350	4	188	1.63	158	1.962	890	5	1	1	8.5	6	0.003	0	38	1	86.5	NaN	NaN	23.45	10.783	0
451	2009	11	1	2	21	0	734078	35.5	210	124	50	0.71	36	0.778	66	1	3	1	10.5	7.5	0.449	0	77.762	25	74.8	NaN	NaN	23.45	18.609	5
452	2009	11	1	2	25	36	734078	37.5	216	132	32	1	52	0.712	70	1	7	1	14	7	0.462	1	76.59	25	72.8	NaN	NaN	23.45	18.207	5
453	2009	11	1	2	30	22	734078	47	248	164	48	0.688	36	1.306	50	1	7	1	50	16.5	0.55	0	68.967	29	98	NaN	NaN	23.4	18.331	0
454	2009	11	1	2	35	20	734078	37.5	210	148	22	1.409	40	0.762	46	1	5	1	21.5	7.5	0.578	0	72.403	25	71	NaN	NaN	23.45	18.457	5
455	2009	11	1	2	39	36	734078	111.5	302	4	232	0.474	66	1.629	120	9	1	1	5.5	4	0.009	0	44.25	1	97	NaN	NaN	23.45	15.433	3
456	2009	11	1	2	46	38	734078	53.5	158	82	46	1.163	30	1.317	46	1	3	1	21	14	0.402	0	67.226	9	72.3	NaN	NaN	23.5	17.551	5
457	2009	11	1	2	50	2	734078	53	218	108	60	0.883	50	0.84	44	1	7	1	20	14.5	0.412	1	67.623	15	93.8	NaN	NaN	23.5	17.607	0
458	2009	11	1	2	54	24	734078	46.5	204	108	46	0.957	50	0.8	46	1	5	1	13	6.5	0.432	0	70.05	19	91.5	NaN	NaN	23.5	17.668	0
459	2009	11	1	2	58	34	734078	217	290	64	110	1.945	116	1.78	118	1	11	1	50.5	14.5	0.157	0	40.318	1	98.8	NaN	NaN	23.5	13.241	4
460	2009	11	1	3	5	22	734078	50	194	104	42	1.179	48	0.927	44	1	7	1	13	6.5	0.437	0	66.712	17	99.8	NaN	NaN	23.5	17.609	7
461	2009	11	1	3	9	20	734078	123.5	242	14	160	0.744	68	1.787	110	7	1	1	6.5	4.5	0.04	0	41.938	1	90.8	NaN	NaN	23.45	15.025	0
462	2009	11	1	3	15	12	734078	51.5	170	84	40	1.188	46	1.12	46	1	3	1	20	10.5	0.389	0	67.215	11	95.8	NaN	NaN	23.5	17.709	2
463	2009	11	1	3	18	48	734078	218	252	4	128	1.672	120	1.796	110	5	1	1	6.5	4	0.011	0	39	1	79	NaN	NaN	23.5	13.183	2
464	2009	11	1	3	24	50	734078	49.5	196	118	40	1.2	38	1.066	42	1	5	1	17.5	9	0.496	0	67.45	13	100	NaN	NaN	23.45	17.732	3
465	2009	11	1	3	28	48	734078	66.5	202	4	102	0.642	96	0.682	44	5	1	1	2	1	0.016	0	52.333	1	88	NaN	NaN	23.4	16.017	2
466	2009	11	1	3	32	54	734078	43	226	140	42	0.94	44	0.83	38	1	5	1	30	10.5	0.53	0	70.961	25	98	NaN	NaN	23.4	17.852	3
467	2009	11	1	3	37	18	734078	195	310	2	208	0.938	100	1.945	210	5	1	1	0.5	0.5	0.004	0	41.125	1	94.8	NaN	NaN	23.4	13.625	3
468	2009	11	1	3	45	58	734078	174	344	30	224	0.77	90	1.933	230	5	7	1	18.5	6.5	0.052	0	36.688	1	97.5	NaN	NaN	23.45	13.972	2
469	2009	11	1	3	55	32	734078	50	188	82	56	0.893	50	0.82	44	1	5	1	15	9	0.353	0	68.208	17	99.8	NaN	NaN	23.45	17.345	3
470	2009	11	1	3	59	24	734078	45	200	120	38	1.132	42	0.869	34	1	7	1	16.5	9.5	0.513	0	71.258	19	100.8	NaN	NaN	23.45	17.678	1
471	2009	11	1	4	3	18	734078	42	110	34	32	1.203	44	0.852	126	1	1	9	8	4.5	0.144	1	70.278	5	97	NaN	NaN	23.45	17.328	4
472	2009	11	1	4	7	14	734078	242	286	24	124	1.69	138	1.754	184	3	5	1	36.5	34	0.051	0	38.192	1	83.3	NaN	NaN	23.45	12.988	1
473	2009	11	1	4	15	4	734078	244.5	400	4	268	0.886	128	1.895	364	7	1	3	9	7	0.005	1	39.167	1	102	NaN	NaN	23.35	12.533	1
474	2009	11	1	4	27	48	734078	40.5	152	58	36	1.097	58	0.491	42	1	1	1	13	12	0.299	0	75.917	5	93.8	NaN	NaN	23.4	17.782	5
475	2009	11	1	4	31	2	734078	39	192	116	34	1.074	42	0.69	46	1	1	1	12.5	10	0.487	1	74.5	17	74	NaN	NaN	23.4	17.734	3
476	2009	11	1	4	35	0	734078	39	202	116	36	1.069	50	0.62	60	1	7	1	16.5	8	0.443	1	75.343	21	86.8	NaN	NaN	23.4	17.583	2
477	2009	11	1	4	39	22	734078	74.5	184	12	118	0.513	54	1.38	102	5	3	1	16	15	0.042	0	57.536	1	89.8	NaN	NaN	23.4	16.15	0
478	2009	11	1	4	44	8	734078	36	182	118	26	1.269	38	0.763	50	1	5	1	23	9	0.509	0	75.475	25	83.3	NaN	NaN	23.45	17.926	1
479	2009	11	1	4	47	60	734078	38.5	198	134	26	1.173	38	1.013	44	1	7	1	60	21.5	0.554	1	75.599	23	79.5	NaN	NaN	23.45	18.089	0
480	2009	11	1	4	52	2	734078	32	166	108	20	1.275	38	0.645	44	1	7	1	34	10.5	0.514	0	76.882	25	97.8	NaN	NaN	23.45	18.355	3
481	2009	11	1	4	55	32	734078	28.5	170	116	20	1.225	34	0.676	42	1	9	1	17.5	6	0.547	0	78.936	25	96.3	NaN	NaN	23.45	18.508	1
482	2009	11	1	4	59	4	734078	44.5	202	98	36	1.181	68	0.463	44	1	3	1	22	15.5	0.398	0	72.215	19	82.8	NaN	NaN	23.45	17.427	1
483	2009	11	1	5	3	10	734078	184	334	88	144	0.938	102	1.804	120	3	7	1	59	51	0.194	0	38.75	1	84.5	NaN	NaN	23.45	14.293	0
484	2009	11	1	5	10	44	734078	53.5	230	140	38	1.25	52	0.962	182	1	9	1	54.5	23	0.34	0	64.324	21	78	NaN	NaN	23.5	16.84	0
485	2009	11	1	5	17	36	734078	43.5	144	72	34	1.279	38	0.803	34	1	3	1	14	13	0.404	0	73.196	9	97.8	NaN	NaN	23.5	17.528	0
486	2009	11	1	5	20	34	734078	169	270	54	118	1.36	98	1.719	168	3	5	1	22	10.5	0.123	0	38.214	5	75	NaN	NaN	23.5	14.207	1
487	2009	11	1	5	27	52	734078	47	192	102	40	1.125	50	0.77	50	1	3	1	22.5	12.5	0.421	0	70.053	13	92.8	NaN	NaN	23.5	17.175	1
488	2009	11	1	5	31	54	734078	170.5	286	2	186	0.917	98	1.735	110	7	1	1	0.5	0.5	0.005	0	39.125	1	76.3	NaN	NaN	23.55	13.875	0
489	2009	11	1	5	38	30	734078	40.5	198	122	32	1.172	44	0.795	44	1	3	1	17.5	7	0.504	0	72.153	19	100.5	NaN	NaN	23.55	17.289	0
490	2009	11	1	5	42	32	734078	225	282	12	138	1.591	132	1.693	90	5	3	1	11	7.5	0.032	0	39.107	1	83.8	NaN	NaN	23.5	13.271	0
491	2009	11	1	5	48	44	734078	44.5	152	48	34	1.294	70	0.507	28	1	1	3	9.5	9	0.267	0	70.1	5	94.3	NaN	NaN	23.35	17.15	1
492	2009	11	1	5	51	44	734078	43.5	208	126	36	1.111	46	0.804	42	1	11	1	20	6.5	0.504	1	70.281	21	97	NaN	NaN	23.3	17.08	0
493	2009	11	1	5	55	54	734078	46	248	168	32	1.234	48	0.698	38	1	5	1	26	12.5	0.587	1	71.141	21	86.3	NaN	NaN	23.25	16.982	0
494	2009	11	1	6	0	40	734078	130	374	16	292	0.396	66	1.97	320	13	3	1	19.5	17	0.023	0	42.222	1	101	NaN	NaN	23.35	15.033	0
495	2009	11	1	6	12	14	734078	116.5	236	2	168	0.693	66	1.758	112	7	1	1	0.5	0.5	0.006	0	43.875	1	97.3	NaN	NaN	23.4	15.2	0
496	2009	11	1	6	18	2	734078	202	252	2	140	1.443	110	1.836	146	5	1	1	0	0	0.005	0	37.25	1	72.3	NaN	NaN	23.3	13.55	0
497	2009	11	1	6	24	40	734078	86.5	202	100	52	1.279	50	1.73	92	1	3	1	55	37.5	0.34	0	52.029	13	80.8	NaN	NaN	23.3	15.974	0
498	2009	11	1	6	29	34	734078	63	264	74	152	0.414	38	1.474	118	5	3	1	32	17	0.194	0	54.671	9	94.5	NaN	NaN	23.25	16.143	0
499	2009	11	1	6	35	56	734078	75	184	4	134	0.541	46	1.598	76	7	1	1	4	2.5	0.015	0	49.583	1	95.8	NaN	NaN	23.25	15.683	0
500	2009	11	1	6	40	16	734078	36.5	146	74	24	1.479	48	0.625	28	1	5	1	11.5	7	0.425	0	71.362	7	72.3	NaN	NaN	23.3	17.603	1
501	2009	11	1	6	43	10	734078	241	340	44	170	1.415	126	1.913	158	5	7	1	4.5	1	0.088	0	37.207	1	93.8	NaN	NaN	23.3	11.713	0
502	2009	11	1	6	51	28	734078	163.5	274	10	184	0.837	80	2.031	352	7	3	1	11.5	9.5	0.016	0	38.25	1	81	NaN	NaN	23.15	13.975	0
503	2009	11	1	7	1	54	734078	31.5	116	40	22	1.318	54	0.472	38	1	1	1	8.5	6	0.26	0	70.06	1	73.5	NaN	NaN	23.15	18.029	0
504	2009	11	1	7	4	28	734078	144	246	4	164	0.869	78	1.833	148	5	1	1	2.5	1.5	0.01	0	41.5	1	78.5	NaN	NaN	23.1	14.533	0
505	2009	11	1	7	11	2	734078	228.5	314	4	192	1.188	118	1.919	110	5	1	1	2.5	2	0.009	0	38.75	1	91.5	NaN	NaN	23	11.7	0
506	2009	11	1	7	18	6	734078	45.5	182	126	30	1.517	26	1.673	118	1	7	1	85	40	0.42	0	63.973	29	89.8	NaN	NaN	22.95	18.893	1
507	2009	11	1	7	23	6	734078	19.5	72	26	12	1.5	34	0.5	192	1	3	3	8	2.5	0.098	0	69.411	7	73	NaN	NaN	22.95	19.136	0
508	2009	11	1	7	27	30	734078	27	102	44	24	1.104	34	0.676	30	1	5	1	19.5	10	0.333	0	68.217	7	93	NaN	NaN	22.85	18.7	0
509	2009	11	1	7	29	42	734078	25.5	106	50	20	1.075	36	0.514	20	1	3	3	13	7	0.397	1	71.481	5	70.8	NaN	NaN	22.9	18.721	0
510	2009	11	1	7	31	48	734078	219	238	2	108	2.023	128	1.711	166	1	1	1	0.5	0.5	0.005	0	38.75	1	89	NaN	NaN	22.85	11.7	0
511	2009	11	1	7	38	32	734078	180.5	216	4	108	1.657	104	1.721	122	3	1	1	3	1.5	0.012	0	38.667	1	92.5	NaN	NaN	22.7	13.717	0
512	2009	11	1	7	44	10	734078	59.5	136	28	64	0.688	44	1.352	66	3	1	1	15.5	15.5	0.139	0	50.267	1	83.5	NaN	NaN	22.8	16.02	0
513	2009	11	1	7	47	32	734078	132.5	190	4	104	1.231	82	1.604	88	5	1	1	5.5	4.5	0.014	0	41.667	1	75.8	NaN	NaN	22.8	14.617	0
514	2009	11	1	7	52	10	734078	24	100	62	20	1.05	18	1.167	24	1	5	1	19	7.5	0.5	0	70	7	68.3	NaN	NaN	22.7	19.211	0
515	2009	11	1	7	54	14	734078	166.5	242	4	144	1.146	94	1.761	98	5	1	1	2.5	1.5	0.012	0	40.333	1	92.5	NaN	NaN	22.7	13.75	0
516	2009	11	1	7	59	54	734078	160.5	270	50	134	1.179	86	1.866	118	5	7	1	21.5	10.5	0.129	1	38.394	1	83.8	NaN	NaN	22.7	13.948	0
517	2009	11	1	8	6	22	734078	22.5	82	30	16	1.063	36	0.625	22	1	3	1	7.5	6.5	0.288	0	65.625	7	84.8	NaN	NaN	22.85	18.959	0
518	2009	11	1	8	8	6	734078	158	250	18	142	1.007	90	1.75	100	5	1	1	15.5	15	0.051	0	38.65	1	86	NaN	NaN	22.7	13.97	1
519	2009	11	1	8	13	56	734078	26	90	48	16	1.25	26	1	28	1	5	1	15	8.5	0.407	0	63.95	11	73.5	NaN	NaN	22.7	18.892	1
520	2009	11	1	8	15	54	734078	20.5	82	34	16	1.281	32	0.641	56	1	5	7	8	3.5	0.246	0	60.931	13	79.3	NaN	NaN	22.6	18.964	0
521	2009	11	1	8	18	12	734078	12	24	4	10	1.2	10	1.15	84	1	1	1	0.5	0.5	0.037	0	67.083	1	86.5	NaN	NaN	22.65	20.8	0
522	2009	11	1	8	20	0	734078	190	224	28	86	2.192	110	1.727	116	5	3	1	6.5	4	0.082	0	38.8	1	86	NaN	NaN	22.7	13.393	0
523	2009	11	1	8	25	40	734078	143.5	194	4	110	1.273	80	1.775	112	3	1	1	5	3.5	0.013	0	38.833	1	86.8	NaN	NaN	22.65	14.083	0
524	2009	11	1	8	30	46	734078	24.5	96	32	24	0.938	40	0.613	24	1	3	1	11	6.5	0.267	0	62.103	7	83.5	NaN	NaN	22.65	19.174	1
525	2009	11	1	8	32	46	734078	176	256	22	140	1.254	94	1.867	128	9	1	1	1	0.5	0.057	0	37.896	1	75.8	NaN	NaN	22.65	13.6	0
526	2009	11	1	8	39	10	734078	16	62	10	24	0.646	28	0.571	48	1	1	1	0.5	0.5	0.091	0	69.292	3	86.8	NaN	NaN	22.45	19.858	1
527	2009	11	1	8	41	0	734078	29.5	146	6	106	0.278	34	0.75	36	7	1	1	4	4	0.033	0	56.75	1	82.3	NaN	NaN	22.35	18.75	1
528	2009	11	1	8	44	2	734078	17.5	108	62	24	0.729	22	0.591	26	1	5	1	26.5	8	0.463	0	65.945	13	81.3	NaN	NaN	22.45	20.6	0
529	2009	11	1	8	46	16	734078	20.5	68	10	22	0.886	36	0.569	6	1	1	1	1	1	0.135	0	61.125	1	81.8	NaN	NaN	22.55	18.742	0
530	2009	11	1	8	47	30	734078	152	234	14	138	1.098	82	1.848	130	5	3	1	2	0.5	0.038	0	38.531	3	83.3	NaN	NaN	22.35	13.844	0
531	2009	11	1	8	53	34	734078	10.5	62	22	30	0.317	10	0.75	54	1	1	1	4	3	0.19	0	73.021	3	85	NaN	NaN	22.35	20.733	0
532	2009	11	1	8	55	30	734078	8.5	62	26	24	0.313	12	0.5	44	1	3	1	4.5	2.5	0.245	0	74.304	7	80.3	NaN	NaN	22.3	20.639	1
533	2009	11	1	8	57	16	734078	14.5	86	18	42	0.345	26	0.442	68	1	3	1	5	3	0.117	0	71.1	1	79.8	NaN	NaN	22.35	20.24	1
534	2009	11	1	8	59	50	734078	19.5	112	60	18	0.972	34	0.574	22	1	5	1	12	4	0.448	0	64.927	13	74.5	NaN	NaN	22.65	19.185	0
535	2009	11	1	9	2	4	734078	25	86	16	18	1.083	52	0.481	18	1	1	1	5.5	5.5	0.154	0	57.556	3	68.5	NaN	NaN	22.7	18.733	0
536	2009	11	1	9	3	48	734078	16	96	24	42	0.298	30	0.517	52	1	1	1	4	3.5	0.162	0	69.038	3	81.8	NaN	NaN	22.65	19.804	0
537	2009	11	1	9	6	16	734078	34	166	68	48	0.51	50	0.58	30	1	3	1	15.5	9.5	0.347	0	58.564	9	84	NaN	NaN	22.6	18.106	1
538	2009	11	1	9	9	32	734078	11.5	92	32	38	0.276	22	0.432	50	1	3	1	4	2	0.225	0	70.559	7	85.8	NaN	NaN	22.7	20.45	0
539	2009	11	1	9	11	54	734078	19.5	84	28	34	0.574	22	0.659	2	1	1	1	5	5	0.326	0	63.25	5	79.5	NaN	NaN	22.55	19.487	0
540	2009	11	1	9	13	20	734078	24	132	42	56	0.429	34	0.515	46	1	3	1	7.5	7	0.236	0	63.67	3	81	NaN	NaN	22.35	19.182	0
541	2009	11	1	9	16	18	734078	8.5	88	42	26	0.308	20	0.35	34	1	3	1	3	2	0.344	0	72.193	9	84.3	NaN	NaN	22	20.336	0
542	2009	11	1	9	18	20	734078	8.5	98	52	30	0.233	16	0.406	638	3	1	1	3.5	2	0.071	1	72.222	13	78.5	NaN	NaN	21.9	20.209	0
543	2009	11	1	9	30	36	734078	7	76	32	26	0.192	18	0.389	1010	1	1	1	2	2	0.029	0	71.706	9	77	NaN	NaN	21.6	20.703	2
544	2009	11	1	9	48	42	734078	14.5	70	12	32	0.453	26	0.423	32	1	1	1	3.5	3.5	0.118	0	62.929	3	73.8	NaN	NaN	21.15	20.093	0
545	2009	11	1	9	50	24	734078	17.5	124	74	22	0.659	28	0.625	314	1	7	1	6	3	0.169	0	60.757	5	79.3	NaN	NaN	21.15	19.887	4
546	2009	11	1	9	57	42	734078	7	92	56	16	0.438	20	0.25	NaN	1	1	1	2	2	NaN	0	70.224	5	77.5	NaN	NaN	21.2	20.626	4
							AVG	83.0229	3.07393	0.934432	1.13712	0.877022	1.00238	0.918965	6.60177		4.25641					0.2106
							SD	116.68	2.22028	0.798459	0.987214	0.656334	0.929005	0.618386	3886.56		4.70918
								421.5	10.7333	5.23333
							SUM		27.9728

## Sheet: SCF02_iknos_DiveStat
DiveNumber	Year	Month	Day	Hour	Min	Sec	JulDate	Maxdepth	Dduration	Botttime	DescTime	DescRate	AscTime	AscRate	PDI	DWigglesDesc	DWigglesBott	DWigglesAsc	TotVertDistBot	BottRange	Efficiency	IDZ	LightAtBott	LWiggles	LightAtSurf	Lattenuation	EuphoticDepth	TempAtSurf	TempAtBott	ThermoclineDepth
1	2009	10	28	18	27	22	734075	6.5	100	70	18	0.306	12	0.417	98	1	9	1	9.5	2	0.354	0	209.021	17	218.5	NaN	NaN	22.25	21.581	NaN
2	2009	10	28	18	30	40	734075	7.5	80	42	20	0.325	18	0.361	138	1	1	1	2	1	0.193	0	211.398	11	226.5	NaN	NaN	22	19.448	0
3	2009	10	28	18	34	18	734075	6	98	60	24	0.188	14	0.321	59038	1	5	1	5	2	0.001	0	213.226	15	217.5	NaN	NaN	21.85	21.506	0
4	2009	10	29	10	59	54	734075	8.5	120	88	24	0.25	8	0.75	58	1	7	1	9	2.5	0.494	0	81.144	23	73	NaN	NaN	20.95	18.889	0
5	2009	10	29	11	2	52	734075	9.5	144	106	24	0.354	14	0.643	48	1	7	1	7.5	3	0.552	0	88.741	33	90.8	NaN	NaN	20.95	19.34	0
6	2009	10	29	11	6	4	734075	18	146	64	50	0.26	32	0.422	86	3	1	1	9.5	5	0.276	0	87.485	13	99.5	NaN	NaN	20.8	18.724	3
7	2009	10	29	11	9	56	734075	30.5	232	138	42	0.571	52	0.462	262	1	11	1	21	6.5	0.279	0	88.65	35	107.5	NaN	NaN	20.9	17.872	0
8	2009	10	29	11	18	10	734075	24	132	44	54	0.407	34	0.529	376	1	3	1	9	6	0.087	0	114.217	11	117	NaN	NaN	20.6	18.437	0
9	2009	10	29	11	26	38	734075	15.5	80	26	28	0.482	26	0.596	1222	1	5	1	5	3	0.02	0	126.696	9	156	NaN	NaN	20.3	18.786	0
10	2009	10	29	11	48	20	734075	5.5	22	4	4	1	14	0.321	1872	1	1	1	2.5	1.5	0.002	0	172.833	1	130.8	NaN	NaN	20.45	19.95	0
11	2009	10	29	12	19	54	734076	29	152	66	42	0.56	44	0.602	3932	1	7	1	13	5.5	0.016	0	173.213	21	NaN	NaN	-4.2	21.25	17.912	0
12	2009	10	29	13	27	58	734076	25.5	76	2	38	0.671	36	0.708	458	1	1	1	0	0	0.004	0	185.375	1	207.5	NaN	NaN	23.8	18.175	0
13	2009	10	29	13	36	52	734076	24	86	14	32	0.734	40	0.575	338	1	1	1	1.5	1	0.033	1	183.281	5	NaN	NaN	5.7	23.8	18.125	1
14	2009	10	29	13	43	56	734076	23	84	26	26	0.885	32	0.531	112	1	1	1	6	6	0.133	1	187.036	9	NaN	NaN	-2.1	23.75	18.854	4
15	2009	10	29	13	47	12	734076	38.5	140	26	44	0.875	70	0.529	646	1	1	1	1.5	1.5	0.033	0	175.982	9	NaN	NaN	0.7	23.65	17.471	0
16	2009	10	29	14	0	18	734076	19.5	74	8	24	0.813	42	0.464	1058	1	1	1	0	0	0.007	0	188.75	3	198.5	NaN	NaN	23.75	18.87	0
17	2009	10	29	14	19	10	734076	157	264	4	84	1.839	176	0.884	716	1	1	1	4	2.5	0.004	0	131.667	1	197	NaN	NaN	23.6	14.217	2
18	2009	10	29	14	35	30	734076	429.5	544	98	194	2.211	252	1.692	252	1	5	1	5.5	3	0.123	0	41.225	3	NaN	NaN	3.5	23.45	8.916	0
19	2009	10	29	14	48	46	734076	407	562	158	176	2.304	228	1.752	278	1	11	1	15	8	0.188	1	47.013	21	NaN	NaN	1.3	23.45	9.475	0
20	2009	10	29	15	2	46	734076	393.5	528	130	172	2.27	226	1.739	316	1	11	1	10.5	3	0.154	1	51.879	19	NaN	NaN	-0.1	23.55	9.642	0
21	2009	10	29	15	16	50	734076	381	564	182	168	2.265	214	1.773	326	1	15	1	15	3.5	0.204	1	56.674	29	NaN	NaN	5.2	23.55	9.75	0
22	2009	10	29	15	31	40	734076	372	486	110	168	2.211	208	1.788	336	1	7	1	4.5	1	0.134	1	61.085	15	NaN	NaN	3.6	23.55	10.204	0
23	2009	10	29	15	45	22	734076	365.5	500	126	160	2.269	214	1.701	390	1	13	1	13.5	2.5	0.142	1	63.941	29	NaN	NaN	3	23.55	10.2	3
24	2009	10	29	16	0	12	734076	360	492	118	162	2.213	212	1.691	250	1	11	3	8	1.5	0.159	1	65.954	23	NaN	NaN	4.4	22.85	10.449	0
25	2009	10	29	16	12	34	734076	364.5	580	230	156	2.276	194	1.765	384	1	9	1	37.5	22	0.239	1	69.83	35	NaN	NaN	2.2	23.5	10.494	0
26	2009	10	29	16	28	38	734076	350.5	434	70	158	2.218	206	1.692	332	1	9	1	6	2.5	0.091	1	70.84	19	NaN	NaN	-3.1	23.5	10.561	1
27	2009	10	29	16	41	24	734076	347.5	446	90	152	2.273	204	1.703	306	1	7	1	10	3.5	0.12	1	74.935	23	NaN	NaN	-0.1	23.5	10.578	1
28	2009	10	29	16	53	56	734076	347	436	86	150	2.307	200	1.728	296	1	7	1	7.5	2	0.117	1	75.858	25	NaN	NaN	0.1	23.5	10.307	1
29	2009	10	29	17	6	8	734076	346.5	446	92	154	2.244	200	1.728	330	1	9	1	7	1.5	0.119	1	76.516	25	NaN	NaN	-4	23.5	10.16	0
30	2009	10	29	17	19	4	734076	344	514	162	152	2.253	200	1.718	370	1	9	1	9	2	0.183	1	80.119	45	NaN	NaN	1	23.55	10.162	2
31	2009	10	29	17	33	48	734076	336.5	494	138	156	2.154	200	1.678	392	1	11	1	11.5	3	0.156	1	79.957	31	NaN	NaN	2.1	23.6	10.501	0
32	2009	10	29	17	48	34	734076	333	490	146	152	2.164	192	1.734	292	1	7	1	23	9.5	0.187	1	87.216	37	NaN	NaN	3.7	23.35	10.832	0
33	2009	10	29	18	1	36	734076	332.5	504	142	148	2.22	214	1.554	330	1	21	1	25	7	0.17	1	87.024	39	NaN	NaN	-0.2	23.7	10.74	1
34	2009	10	29	18	15	30	734076	346	498	130	162	2.077	206	1.68	392	1	7	1	14.5	9.5	0.146	1	83.223	35	NaN	NaN	-1.1	23.55	10.467	1
35	2009	10	29	18	30	20	734076	392	598	206	174	2.175	218	1.755	362	1	9	1	37.5	15.5	0.215	0	63.659	25	NaN	NaN	1.3	23.8	10.35	0
36	2009	10	29	18	46	20	734076	354.5	490	122	162	2.173	206	1.687	218	1	13	1	25	10	0.172	1	74.847	33	NaN	NaN	2.6	23.9	10.492	1
37	2009	10	29	18	58	8	734076	351	582	226	158	2.215	198	1.737	278	1	7	1	21	7	0.263	1	78.382	45	NaN	NaN	3.5	23.8	10.525	0
38	2009	10	29	19	12	28	734076	357	508	158	156	2.224	194	1.804	318	1	7	1	22	10	0.191	1	74.972	25	NaN	NaN	3.1	23.95	10.32	0
39	2009	10	29	19	26	14	734076	399.5	668	286	156	2.215	226	1.768	492	1	9	1	58	54	0.247	0	65.38	19	NaN	NaN	-1	24	10.274	1
40	2009	10	29	19	45	34	734076	374	494	102	182	2.033	210	1.726	444	1	3	1	16.5	11.5	0.109	1	65.663	13	NaN	NaN	2	24	10.2	0
41	2009	10	29	20	1	12	734076	297.5	412	74	150	1.977	188	1.582	264	1	15	1	17	2.5	0.109	0	89.822	27	NaN	NaN	2.6	24.05	10.903	0
42	2009	10	29	20	12	28	734076	295.5	404	84	130	2.238	190	1.555	276	1	17	1	22.5	5.5	0.124	1	90.442	25	NaN	NaN	-0.2	24.05	11.026	0
43	2009	10	29	20	23	48	734076	302.5	460	130	134	2.235	196	1.538	288	1	11	3	23.5	6.5	0.174	1	88.186	33	179.4	0.735	7.1	24.15	10.961	0
44	2009	10	29	20	36	16	734076	297	442	118	134	2.198	190	1.553	260	1	11	1	24.5	5	0.168	1	88.858	35	NaN	NaN	3	24.25	10.929	0
45	2009	10	29	20	47	58	734076	302	388	70	134	2.213	184	1.641	208	1	9	1	15.5	7	0.117	1	84.257	25	200.2	-0.54	8.1	24.3	10.764	0
46	2009	10	29	20	57	54	734076	307.5	406	82	134	2.272	190	1.616	240	1	11	1	13.5	5.5	0.127	1	81.101	31	NaN	NaN	2.4	24.3	10.683	0
47	2009	10	29	21	8	40	734076	306.5	534	214	142	2.155	178	1.612	362	1	13	1	32	19.5	0.239	1	86.787	35	NaN	NaN	1.9	24.35	10.836	0
48	2009	10	29	21	23	36	734076	290.5	534	226	140	2.075	168	1.702	362	1	15	1	27.5	9.5	0.252	1	89.836	45	NaN	NaN	4.9	24.35	11.078	0
49	2009	10	29	21	38	32	734076	292.5	486	170	134	2.097	182	1.607	376	1	9	1	22.5	11.5	0.197	1	86.724	39	NaN	NaN	3.2	24.5	11.025	1
50	2009	10	29	21	52	54	734076	312.5	462	134	148	2.044	180	1.736	534	1	5	1	17.5	9.5	0.135	1	77.059	19	179.6	1.582	6.9	24.35	11.139	0
51	2009	10	29	22	9	30	734076	352.5	568	214	152	2.266	202	1.745	520	1	3	1	9	8	0.197	0	57.87	29	170.7	0.754	6.7	24.3	10.666	0
52	2009	10	29	22	27	38	734076	355	528	150	174	2.026	204	1.74	2392	1	5	1	4.5	2.5	0.051	1	54.809	17	NaN	NaN	2	24.35	10.7	1
53	2009	10	29	23	16	18	734076	9.5	86	40	20	0.4	26	0.308	66	1	1	1	3	1.5	0.263	0	187.369	13	199.3	NaN	NaN	24.35	23.586	5
54	2009	10	29	23	18	50	734076	10	98	60	18	0.389	20	0.45	54	1	1	1	4	3	0.395	1	185.435	23	196.9	-0.584	8.6	24.35	22.798	3
55	2009	10	29	23	21	22	734076	15	120	72	26	0.442	22	0.5	218	1	1	1	7.5	4	0.213	0	181.345	23	NaN	NaN	-8.5	24.35	22.069	6
56	2009	10	29	23	27	0	734076	17	120	58	26	0.481	36	0.403	156	1	1	1	7	4.5	0.21	0	177.542	21	NaN	NaN	-1.2	24.35	20.148	3
57	2009	10	29	23	31	36	734076	17	126	70	24	0.5	32	0.469	90	1	5	1	10	5	0.324	1	174.611	27	NaN	NaN	-6.1	24.35	20.174	3
58	2009	10	29	23	35	12	734076	18	124	76	24	0.542	24	0.604	68	1	5	1	10.5	5	0.396	1	171.577	23	NaN	NaN	-7.1	24.3	19.388	2
59	2009	10	29	23	38	24	734076	19	132	64	36	0.444	32	0.484	90	1	1	1	6.5	3.5	0.288	1	168.098	21	NaN	NaN	-4.6	24.25	19.624	4
60	2009	10	29	23	42	6	734076	18	130	76	32	0.5	22	0.591	92	1	5	1	9	5	0.342	1	165.321	27	NaN	NaN	-6.8	24.25	18.278	0
61	2009	10	29	23	45	48	734076	88.5	186	12	84	1.03	90	0.983	146	1	1	1	2	2	0.036	0	122.393	5	170.3	NaN	NaN	24.35	15.4	1
62	2009	10	29	23	51	20	734076	101	260	50	92	1.06	118	0.691	106	1	1	1	23	19.5	0.137	0	113.173	7	176.8	NaN	NaN	24.35	15.473	2
63	2009	10	29	23	57	26	734076	243	390	16	148	1.632	226	1.053	112	1	1	1	6.5	5	0.032	0	53.25	3	161.3	NaN	NaN	24.35	12.939	1
64	2009	10	30	0	5	48	734076	7	80	42	22	0.295	16	0.313	168	1	3	1	3.5	2	0.169	0	126.523	11	131.5	NaN	NaN	24.3	23.932	NaN
65	2009	10	30	0	9	56	734076	31	186	88	54	0.546	44	0.523	58	1	1	1	9.5	8	0.361	0	105.15	29	132.3	NaN	NaN	24.3	17.3	4
66	2009	10	30	0	14	0	734076	47	216	94	58	0.586	64	0.57	48	1	1	1	23.5	13	0.356	0	87	25	127	NaN	NaN	24.2	17.124	2
67	2009	10	30	0	18	24	734076	44.5	208	120	44	0.739	44	0.807	50	1	1	1	21	12	0.465	1	80.75	31	112.8	NaN	NaN	24.15	17.176	2
68	2009	10	30	0	22	42	734076	45.5	252	148	52	0.788	52	0.702	56	1	9	1	34.5	11.5	0.481	1	74.103	21	97.3	NaN	NaN	24.15	17.161	1
69	2009	10	30	0	27	50	734076	69	250	68	114	0.553	68	0.897	98	1	3	1	18	8	0.195	0	54.579	11	90	NaN	NaN	24.15	15.824	0
70	2009	10	30	0	33	38	734076	32.5	226	160	26	1.096	40	0.575	56	1	17	1	42.5	10.5	0.567	0	74.034	43	84.5	NaN	NaN	24.1	17.322	2
71	2009	10	30	0	38	20	734076	26	254	190	26	0.885	38	0.592	64	1	17	1	18.5	3.5	0.597	0	78.742	49	98.3	NaN	NaN	24.15	17.413	2
72	2009	10	30	0	43	38	734076	31	242	176	28	0.839	38	0.592	82	1	7	1	20	8.5	0.543	0	76.598	49	86.8	NaN	NaN	24.2	17.384	3
73	2009	10	30	0	49	2	734076	33	244	160	42	0.631	42	0.595	92	1	7	1	19.5	8.5	0.476	1	76.133	43	97.5	NaN	NaN	24.15	17.342	1
74	2009	10	30	0	54	38	734076	31.5	238	172	32	0.875	34	0.676	80	1	11	1	20	8.5	0.541	1	76.17	49	92.8	NaN	NaN	24.2	17.42	2
75	2009	10	30	0	59	56	734076	32	232	156	36	0.722	40	0.613	168	1	11	1	22.5	7.5	0.39	1	76.525	41	98	NaN	NaN	24.15	17.453	4
76	2009	10	30	1	6	36	734076	57	234	4	130	0.431	100	0.56	72	3	1	3	2	1	0.013	0	59.583	1	93	NaN	NaN	24.15	16.55	2
77	2009	10	30	1	11	42	734076	47.5	276	170	54	0.741	52	0.654	88	1	15	1	33	13.5	0.467	0	70.009	41	93.3	NaN	NaN	24.15	17.22	4
78	2009	10	30	1	17	46	734076	50.5	108	38	46	0.815	24	2.042	34	1	5	1	27.5	13	0.268	1	65.213	7	92	NaN	NaN	24.1	17.192	0
79	2009	10	30	1	20	8	734076	8	36	0	32	0.25	4	2	22	7	1	1	0	0	0	0	84	1	82	NaN	NaN	24.1	22.8	4
80	2009	10	30	1	21	6	734076	15.5	60	18	28	0.393	14	1.107	14	7	3	3	6.5	5.5	0.243	0	71.25	7	90.3	NaN	NaN	24.15	20.93	2
81	2009	10	30	1	22	20	734076	9	38	16	6	1.25	16	0.563	78	1	3	1	6.5	3.5	0.138	0	78.056	5	97.5	NaN	NaN	24.1	23.522	5
82	2009	10	30	1	24	16	734076	5	18	0	14	0.357	4	1.25	14	3	1	1	0	0	0	0	82.5	1	96.3	NaN	NaN	24.15	24.1	2
83	2009	10	30	1	24	48	734076	5	18	10	4	1.25	4	1.25	150	1	5	1	5	1.5	0.06	1	75.667	3	91	NaN	NaN	24.15	24.1	0
84	2009	10	30	1	27	36	734076	58.5	248	56	64	0.844	128	0.402	64	1	3	5	17.5	7	0.179	0	63.552	5	99	NaN	NaN	24.1	16.278	3
85	2009	10	30	1	32	48	734076	283.5	338	2	156	1.814	180	1.575	412	7	1	1	0.5	0.5	0.003	0	39.625	1	98.8	NaN	NaN	24.1	12.1	0
86	2009	10	30	1	45	18	734076	152	332	48	180	0.594	104	1.462	170	7	5	1	49	46	0.096	0	42.12	3	99.3	NaN	NaN	24.1	14.914	0
87	2009	10	30	1	53	40	734076	78	246	74	60	1.267	112	0.674	72	1	5	1	35.5	16.5	0.233	0	55.368	9	75.8	NaN	NaN	24.1	15.65	2
88	2009	10	30	1	58	58	734076	251	362	34	154	1.399	174	1.443	212	7	3	1	38.5	35.5	0.059	0	36.681	1	77.8	NaN	NaN	24.05	13.419	1
89	2009	10	30	2	8	32	734076	67.5	106	14	54	1.241	38	1.553	40	1	1	1	9	8.5	0.096	0	54.656	5	79	NaN	NaN	24.05	15.775	0
90	2009	10	30	2	10	58	734076	219	254	4	108	2.005	142	1.535	180	5	1	1	3.5	2.5	0.009	0	39.167	1	84.8	NaN	NaN	24	13.783	2
91	2009	10	30	2	18	12	734076	93.5	250	78	60	1.308	112	0.835	82	1	3	1	20	15	0.235	0	51.15	9	78	NaN	NaN	24.05	15.341	0
92	2009	10	30	2	23	44	734076	307.5	448	4	242	1.26	202	1.517	544	15	1	1	3.5	2.5	0.004	0	35.5	1	98.8	NaN	NaN	23.95	11.967	0
93	2009	10	30	2	40	16	734076	184.5	312	78	120	1.392	114	1.395	176	1	7	1	49	25.5	0.16	0	39.263	3	82.3	NaN	NaN	24	14.531	0
94	2009	10	30	2	48	24	734076	57.5	168	84	48	1.104	36	1.139	0	1	11	3	48	17	0.5	0	59.494	17	76.8	NaN	NaN	24	16.836	0
95	2009	10	30	2	51	12	734076	9	14	0	6	1.5	8	1.125	120	1	1	1	0	0	0	0	72.75	1	78	NaN	NaN	23.95	21.35	0
96	2009	10	30	2	53	26	734076	64.5	234	80	64	0.945	90	0.65	60	1	9	1	24	10	0.272	0	62.116	7	80.8	NaN	NaN	24	16.134	2
97	2009	10	30	2	58	20	734076	79	266	52	104	0.654	110	0.718	188	1	1	1	11	11	0.115	0	56.704	5	79.5	NaN	NaN	23.95	15.804	2
98	2009	10	30	3	5	54	734076	75.5	308	142	90	0.617	76	0.993	144	3	5	1	84	51.5	0.314	1	68.809	17	97	NaN	NaN	23.95	16.616	1
99	2009	10	30	3	13	26	734076	36	186	82	30	1.133	74	0.345	78	1	3	1	15.5	11	0.311	0	73.458	27	91	NaN	NaN	23.9	16.873	0
100	2009	10	30	3	17	50	734076	38.5	122	42	32	1.016	48	0.792	54	1	3	1	9.5	6	0.239	1	71.625	13	90.3	NaN	NaN	23.9	16.659	0
101	2009	10	30	3	20	46	734076	38.5	218	140	26	1.154	52	0.529	68	1	3	1	20.5	11	0.49	1	75.965	27	77.8	NaN	NaN	23.9	16.838	0
102	2009	10	30	3	25	32	734076	31.5	174	102	32	0.844	40	0.575	240	1	9	1	17	8.5	0.246	0	77.606	27	92.3	NaN	NaN	23.9	17.145	0
103	2009	10	30	3	32	26	734076	33.5	204	92	48	0.677	64	0.406	282	1	1	3	8.5	7.5	0.189	1	77.926	23	84.3	NaN	NaN	23.95	17.013	1
104	2009	10	30	3	40	32	734076	38	208	94	48	0.583	66	0.424	168	1	1	1	20	10	0.25	0	76.375	23	93.5	NaN	NaN	24.05	16.841	0
105	2009	10	30	3	46	48	734076	46	224	88	48	0.708	88	0.381	106	1	3	1	26.5	12.5	0.267	0	72.633	9	77.3	NaN	NaN	24.05	16.316	1
106	2009	10	30	3	52	18	734076	35	216	124	40	0.85	52	0.471	324	1	7	1	16.5	10.5	0.23	0	76.802	35	97.8	NaN	NaN	23.95	16.882	1
107	2009	10	30	4	1	18	734076	185.5	350	28	194	0.727	128	1.449	162	3	1	1	44.5	44.5	0.055	0	42.467	1	95.5	NaN	NaN	23.95	14.457	0
108	2009	10	30	4	9	50	734076	47.5	202	96	42	0.988	64	0.523	56	1	1	1	20	14	0.372	0	71.214	21	96.8	NaN	NaN	23.9	16.508	0
109	2009	10	30	4	14	8	734076	55.5	248	140	60	0.833	48	0.813	68	1	5	1	46	28	0.443	0	69.419	13	90.8	NaN	NaN	23.9	16.421	1
110	2009	10	30	4	19	24	734076	57	222	68	66	0.803	88	0.585	98	1	1	1	9.5	5.5	0.212	1	63.993	3	93.5	NaN	NaN	23.9	16.177	0
111	2009	10	30	4	24	44	734076	63	214	6	98	0.643	110	0.573	136	3	1	1	0	0	0.017	0	58.125	3	91.8	NaN	NaN	23.95	16.05	0
112	2009	10	30	4	30	34	734076	53	212	34	50	1.06	128	0.309	268	1	1	5	13.5	13.5	0.071	0	67.014	1	90.3	NaN	NaN	23.95	16.483	0
113	2009	10	30	4	38	34	734076	193.5	368	76	164	1.171	128	1.453	278	3	11	1	31	11	0.118	0	36.923	1	87	NaN	NaN	23.95	13.905	0
114	2009	10	30	4	49	20	734076	29.5	158	82	36	0.708	40	0.575	300	1	3	1	11.5	6.5	0.179	0	77.881	17	93.3	NaN	NaN	23.9	17.042	0
115	2009	10	30	4	56	58	734076	46	246	102	80	0.425	64	0.531	398	1	1	1	24	12	0.158	0	70.817	15	86.8	NaN	NaN	23.95	16.609	0
116	2009	10	30	5	7	42	734076	214.5	308	34	122	1.279	152	1.411	140	1	3	1	59.5	59	0.076	0	42	3	97.3	NaN	NaN	23.9	13.933	1
117	2009	10	30	5	15	10	734076	161.5	258	62	78	1.564	118	1.369	128	3	9	1	47.5	39.5	0.161	0	41.328	3	92.5	NaN	NaN	23.9	14.417	0
118	2009	10	30	5	21	36	734076	235	330	38	130	1.615	162	1.451	152	1	1	1	25	25	0.079	0	36.087	1	103.3	NaN	NaN	23.9	13.398	0
119	2009	10	30	5	29	38	734076	69	142	4	112	0.598	26	2.596	94	1	1	1	3.5	2	0.017	0	55.25	1	96	NaN	NaN	23.85	15.95	0
120	2009	10	30	5	33	34	734076	76.5	176	16	112	0.683	48	1.458	32	1	3	1	7.5	6.5	0.077	0	49.472	1	81	NaN	NaN	23.9	15.95	1
121	2009	10	30	5	37	2	734076	9.5	40	4	24	0.354	12	0.625	0	3	1	1	3	2	0.1	0	76	1	78	NaN	NaN	23.9	19.033	1
122	2009	10	30	5	37	42	734076	8.5	18	4	8	1	6	1.167	0	1	1	1	2	1.5	0.222	0	79.833	1	88.5	NaN	NaN	23.9	20.1	0
123	2009	10	30	5	38	0	734076	6.5	24	4	6	1.083	14	0.429	0	1	1	3	0.5	0.5	0.167	0	76.25	1	88.5	NaN	NaN	23.9	20.85	0
124	2009	10	30	5	38	24	734076	6	18	2	10	0.6	6	1	62	1	1	1	0	0	0.025	1	71	1	69	NaN	NaN	23.9	20.8	0
125	2009	10	30	5	39	44	734076	9	16	0	8	1.125	8	1.125	2	1	1	1	0	0	0	0	87.75	1	92.5	NaN	NaN	23.9	19.95	1
126	2009	10	30	5	40	2	734076	7.5	18	0	6	1.25	12	0.625	82	1	1	1	0	0	0	0	82	1	91.8	NaN	NaN	23.9	20.8	1
127	2009	10	30	5	41	42	734076	192	290	10	146	1.315	134	1.422	182	1	1	1	1.5	1.5	0.021	0	36.292	1	72.3	NaN	NaN	23.9	13.85	0
128	2009	10	30	5	49	34	734076	98	210	58	56	1.277	96	1	136	1	15	7	53.5	27.5	0.168	0	44.05	3	97.3	NaN	NaN	23.9	15.467	0
129	2009	10	30	5	55	20	734076	157	240	42	82	1.463	116	1.353	110	3	1	1	37	37	0.12	0	41.636	5	84.3	NaN	NaN	23.9	14.564	0
130	2009	10	30	6	1	10	734076	48	262	118	84	0.429	60	0.567	108	1	1	1	26	14	0.319	0	66.046	9	93.3	NaN	NaN	23.9	16.514	0
131	2009	10	30	6	7	20	734076	279.5	366	16	166	1.569	184	1.516	362	7	1	1	19.5	19	0.022	0	36.694	3	91	NaN	NaN	23.9	12.811	0
132	2009	10	30	6	19	28	734076	48.5	214	76	62	0.548	76	0.599	1296	1	3	1	18.5	14.5	0.05	0	64.897	7	100.3	NaN	NaN	23.9	16.497	2
133	2009	10	30	6	44	38	734076	50	224	98	74	0.493	52	0.683	42	1	1	1	28	14.5	0.368	1	61.41	13	94	NaN	NaN	23.85	16.429	1
134	2009	10	30	6	49	4	734076	185	238	42	64	2.352	132	1.402	164	3	1	1	34.5	34.5	0.104	0	40	1	75.3	NaN	NaN	23.85	13.964	0
135	2009	10	30	6	55	46	734076	176	284	4	162	1.065	118	1.483	212	5	1	1	4.5	3.5	0.008	1	40.25	1	79.8	NaN	NaN	23.85	13.9	0
136	2009	10	30	7	4	2	734076	16	152	112	20	0.7	20	0.6	70	1	3	1	7	4	0.505	0	66.763	17	85.3	NaN	NaN	23.85	17.66	1
137	2009	10	30	7	7	44	734076	33	218	78	98	0.24	42	0.762	74	3	3	1	20.5	9.5	0.267	0	62.725	9	88.8	NaN	NaN	23.85	17.23	2
138	2009	10	30	7	12	36	734076	155	324	70	148	0.77	106	1.439	226	3	9	1	72.5	44.5	0.127	0	37.368	3	85	NaN	NaN	23.85	14.587	0
139	2009	10	30	7	21	46	734076	37.5	142	24	92	0.293	26	1.346	24	1	3	1	14	11	0.145	0	59.173	1	89.5	NaN	NaN	23.8	16.881	1
140	2009	10	30	7	24	32	734076	6.5	52	26	8	0.75	18	0.333	292	1	7	1	10	3.5	0.076	0	70.786	9	91	NaN	NaN	23.75	21.668	1
141	2009	10	30	7	30	16	734076	45	188	108	46	0.783	34	1.324	156	1	19	1	63	22	0.314	0	52.723	23	90.5	NaN	NaN	23.8	16.865	0
142	2009	10	30	7	36	0	734076	22.5	184	130	28	0.75	26	0.712	108	1	5	1	9.5	4	0.445	0	69.064	15	92.8	NaN	NaN	23.8	17.473	0
143	2009	10	30	7	40	52	734076	31.5	110	4	92	0.332	14	1.893	212	3	1	1	6	5	0.012	0	58.167	1	84.5	NaN	NaN	23.85	17.233	0
144	2009	10	30	7	46	14	734076	22	144	66	32	0.516	46	0.359	926	1	1	1	11	5.5	0.062	0	68.235	9	82.5	NaN	NaN	23.6	17.599	1
145	2009	10	30	8	4	4	734076	18	138	90	20	0.9	28	0.536	54	1	7	1	18	7.5	0.469	0	66.326	17	85.5	NaN	NaN	23.85	17.967	2
146	2009	10	30	8	7	16	734076	33	78	4	56	0.554	18	1.611	34	3	1	1	6	4	0.036	0	53.083	1	76.3	NaN	NaN	23.85	17.283	0
147	2009	10	30	8	9	8	734076	21.5	46	4	12	1.625	30	0.55	52	1	1	3	7	5	0.041	0	56.417	1	79.8	NaN	NaN	23.8	17.633	0
148	2009	10	30	8	10	46	734076	5	14	0	10	0.5	4	1.25	274	1	1	1	0	0	0	0	65.5	1	70	NaN	NaN	23.8	22.45	1
149	2009	10	30	8	15	34	734076	92.5	240	120	62	1.427	58	1.569	288	3	17	1	52.5	16.5	0.227	0	40.701	15	76.5	NaN	NaN	23.8	15.707	0
150	2009	10	30	8	24	22	734076	10.5	132	92	18	0.5	22	0.364	2638	1	3	1	5	2.5	0.033	0	61.261	11	77.5	NaN	NaN	23.8	20.715	1
151	2009	10	30	9	10	32	734076	5	30	2	12	0.417	16	0.313	1310	1	1	1	0	0	0.001	0	48.625	1	52	NaN	NaN	23.85	23.125	1
152	2009	10	30	9	32	52	734076	6	56	16	16	0.344	24	0.208	318	1	1	1	1.5	1	0.043	0	47.722	3	54.3	NaN	NaN	23.9	23.767	NaN
153	2009	10	30	9	39	6	734076	19.5	102	36	30	0.65	36	0.403	54	1	1	1	5	5	0.231	0	44.75	5	62.8	NaN	NaN	23.85	18.461	5
154	2009	10	30	9	41	42	734076	17	96	52	16	0.781	28	0.482	760	1	3	1	15	8	0.061	0	46.778	7	61.5	NaN	NaN	23.8	19.859	4
155	2009	10	30	9	55	58	734076	20	110	34	30	0.667	46	0.315	122	1	3	1	6.5	5.5	0.147	0	43.861	5	54.3	NaN	NaN	23.85	18.714	5
156	2009	10	30	9	59	50	734076	8.5	26	0	12	0.708	14	0.607	176	1	1	1	0	0	0	0	60.75	1	78	NaN	NaN	23.8	23.55	5
157	2009	10	30	10	3	12	734076	13	76	12	26	0.5	38	0.276	88	1	3	1	3.5	3	0.073	0	44.571	3	60.5	NaN	NaN	23.8	21.707	5
158	2009	10	30	10	5	56	734076	15	88	54	18	0.833	16	0.656	6	1	9	5	23.5	10	0.574	0	43.214	3	78	NaN	NaN	23.8	23.113	7
159	2009	10	30	10	7	30	734076	5	46	40	4	1.125	2	2	226	1	5	1	10.5	3.5	0.147	0	46.536	3	62.5	NaN	NaN	23.8	23.8	NaN
160	2009	10	30	10	12	2	734076	10	44	12	16	0.625	16	0.531	70	1	3	1	2.5	1.5	0.105	0	45.857	1	60.8	NaN	NaN	23.8	23.379	5
161	2009	10	30	10	13	56	734076	6	22	2	10	0.6	10	0.6	102	1	1	1	0	0	0.016	0	51.125	1	60.5	NaN	NaN	23.8	23.8	NaN
162	2009	10	30	10	16	0	734076	216	268	4	104	2.053	160	1.344	310	3	1	1	3.5	2.5	0.007	0	37.917	1	58.5	NaN	NaN	23.8	14	4
163	2009	10	30	10	25	38	734076	10	42	14	10	0.9	18	0.417	40	1	1	1	3.5	2.5	0.171	0	47.406	1	61.5	NaN	NaN	23.75	23.288	6
164	2009	10	30	10	27	0	734076	147	232	4	116	1.254	112	1.295	202	3	1	1	3.5	2	0.009	0	37.917	1	57.8	NaN	NaN	23.8	14.683	4
165	2009	10	30	10	34	14	734076	10	36	12	14	0.714	10	0.75	246	1	3	1	5.5	4	0.043	0	45.964	3	56.5	NaN	NaN	23.75	23.571	6
166	2009	10	30	10	38	56	734076	10	42	8	14	0.714	20	0.5	62	1	1	1	0	0	0.077	1	47.35	1	60	NaN	NaN	23.75	22.92	3
167	2009	10	30	10	40	40	734076	61	234	84	110	0.409	40	1.525	142	11	11	1	37	16	0.223	0	38.692	11	58.5	NaN	NaN	23.75	16.759	3
168	2009	10	30	10	46	56	734076	108	222	54	90	0.928	78	1.378	214	5	3	1	29	26	0.124	0	38.286	5	58.5	NaN	NaN	23.7	15.166	3
169	2009	10	30	10	54	12	734076	28	228	162	22	0.909	44	0.625	40	1	9	1	13.5	8	0.604	0	53.39	15	68	NaN	NaN	23.7	17.503	3
170	2009	10	30	10	58	40	734076	89.5	200	4	134	0.66	62	1.403	62	5	1	1	3.5	2.5	0.015	0	43.583	1	80	NaN	NaN	23.7	15.2	3
171	2009	10	30	11	3	2	734076	158.5	224	4	112	1.402	108	1.458	116	3	1	1	2.5	1.5	0.012	0	40.333	1	87.3	NaN	NaN	23.65	14.433	3
172	2009	10	30	11	8	42	734076	35	126	40	36	0.917	50	0.56	188	1	1	1	9	7	0.127	0	83.012	9	92	NaN	NaN	23.7	17.164	6
173	2009	10	30	11	13	56	734076	38.5	148	54	48	0.792	46	0.609	254	1	1	1	11	10.5	0.134	0	96.402	19	110.8	NaN	NaN	23.7	17.132	3
174	2009	10	30	11	20	38	734076	304.5	420	70	158	1.921	192	1.583	264	1	9	1	5.5	1	0.102	0	36.319	1	116.8	NaN	NaN	23.7	11.15	2
175	2009	10	30	11	32	2	734076	302	472	130	154	1.958	188	1.574	184	1	13	1	12.5	6	0.198	1	41.689	15	139	NaN	NaN	23.7	11.277	2
176	2009	10	30	11	42	58	734076	289	472	142	148	1.949	182	1.582	168	1	9	1	5.5	1.5	0.222	1	55.74	19	158.8	NaN	NaN	23.65	11.319	3
177	2009	10	30	11	53	38	734076	286.5	448	122	144	1.983	182	1.569	184	1	9	1	10	3	0.193	1	62.718	13	NaN	NaN	5.9	23.65	11.283	2
178	2009	10	30	12	4	10	734077	292.5	470	150	140	2.046	180	1.625	308	1	7	1	9	6	0.193	1	68.339	27	NaN	NaN	-1.9	23.7	11.289	4
179	2009	10	30	12	17	8	734077	307.5	444	108	148	2.024	188	1.636	152	1	7	1	11	8	0.181	1	65.464	21	NaN	NaN	-5.6	23.75	11.226	1
180	2009	10	30	12	27	4	734077	307	466	134	146	2.086	186	1.642	206	1	11	1	10	2.5	0.199	1	67.654	23	NaN	NaN	3.7	23.75	11.2	4
181	2009	10	30	12	38	16	734077	312.5	450	110	146	2.082	194	1.611	182	1	7	1	11.5	8.5	0.174	1	66.772	23	NaN	NaN	-1.6	23.7	11.182	0
182	2009	10	30	12	48	48	734077	319.5	454	106	150	2.09	198	1.614	198	1	5	1	9.5	5.5	0.163	1	66.144	23	NaN	NaN	-3.1	23.7	11.113	0
183	2009	10	30	12	59	40	734077	328	476	122	148	2.152	206	1.585	214	1	5	1	14	9.5	0.177	1	64.895	23	NaN	NaN	4.3	23.7	11.021	2
184	2009	10	30	13	11	10	734077	326.5	442	98	144	2.226	200	1.62	190	1	3	1	9.5	6	0.155	1	65.615	17	NaN	NaN	3.8	23.65	10.978	6
185	2009	10	30	13	21	42	734077	358.5	512	142	146	2.212	224	1.594	254	1	7	1	41.5	35.5	0.185	1	60.41	23	NaN	NaN	1.1	23.6	11.011	2
186	2009	10	30	13	34	28	734077	347.5	462	110	156	2.228	196	1.643	236	1	7	1	32.5	25.5	0.158	1	67.138	27	NaN	NaN	5.3	23.65	11.062	5
187	2009	10	30	13	46	6	734077	321.5	452	108	148	2.172	196	1.622	248	1	5	1	8.5	3.5	0.154	1	73.991	25	NaN	NaN	-0.8	23.55	11.051	9
188	2009	10	30	13	57	46	734077	320.5	426	88	142	2.218	196	1.628	258	1	5	1	9	5.5	0.129	1	76.1	27	NaN	NaN	-3.5	23.7	11.046	7
189	2009	10	30	14	9	10	734077	318	412	74	144	2.205	194	1.626	234	1	11	1	9	3.5	0.115	1	79.039	23	NaN	NaN	-3	23.8	11.15	0
190	2009	10	30	14	19	56	734077	315	472	134	146	2.14	192	1.635	314	1	9	1	9.5	3.5	0.17	1	78.919	35	NaN	NaN	4.5	23.8	11.233	2
191	2009	10	30	14	33	2	734077	322	450	96	150	2.103	204	1.578	376	1	5	3	8.5	6.5	0.116	1	82.398	23	NaN	NaN	2.3	23.8	11.301	3
192	2009	10	30	14	46	48	734077	330.5	452	90	154	2.11	208	1.589	426	1	5	1	7.5	5.5	0.103	1	79.005	29	NaN	NaN	-4.5	23.9	11.255	1
193	2009	10	30	15	1	26	734077	331.5	468	94	158	2.063	216	1.535	328	1	11	5	12.5	7	0.118	1	75.688	23	NaN	NaN	4.6	23.7	11.378	1
194	2009	10	30	15	14	42	734077	338	472	106	156	2.128	210	1.61	282	1	9	1	11	6.5	0.141	1	69.449	27	NaN	NaN	-1.9	23.9	11.345	2
195	2009	10	30	15	27	16	734077	342.5	452	92	156	2.167	204	1.679	242	1	7	1	8.5	4.5	0.133	1	67.867	21	NaN	NaN	1.2	23.85	11.291	0
196	2009	10	30	15	38	50	734077	349.5	476	102	156	2.208	218	1.603	294	1	7	1	8	5	0.132	1	65.486	27	NaN	NaN	-1.4	23.85	11.262	0
197	2009	10	30	15	51	40	734077	356.5	514	134	154	2.266	226	1.575	344	1	13	1	15	8	0.156	1	62.713	23	NaN	NaN	0.8	23.9	11.197	0
198	2009	10	30	16	5	58	734077	359.5	440	62	162	2.204	216	1.664	236	1	5	1	7.5	3.5	0.092	1	62.578	11	NaN	NaN	-2.6	23.9	10.977	5
199	2009	10	30	16	17	14	734077	365.5	496	114	160	2.263	222	1.646	230	1	7	1	9.5	3.5	0.157	1	68.405	17	NaN	NaN	-1.9	23.9	10.728	2
200	2009	10	30	16	29	20	734077	369.5	474	90	166	2.202	218	1.693	230	1	5	1	7.5	4.5	0.128	1	65.598	17	NaN	NaN	-3.7	24	10.714	0
201	2009	10	30	16	41	4	734077	375	472	92	162	2.287	218	1.716	276	1	7	1	8.5	5	0.123	1	65.149	15	NaN	NaN	-3.5	24.1	10.693	1
202	2009	10	30	16	53	32	734077	371	528	130	164	2.262	234	1.581	398	1	15	1	11	2	0.14	1	64.803	29	NaN	NaN	2.2	24.15	10.672	0
203	2009	10	30	17	8	58	734077	371	486	98	162	2.265	226	1.635	266	1	5	1	9	4	0.13	1	65.895	17	NaN	NaN	-1	24.1	10.735	2
204	2009	10	30	17	21	30	734077	368	518	134	160	2.281	224	1.629	382	1	7	1	9	3	0.149	1	67.246	29	NaN	NaN	2.5	24.15	10.697	0
205	2009	10	30	17	36	30	734077	364.5	480	92	164	2.204	224	1.607	734	1	7	1	10.5	4.5	0.076	1	68.378	15	NaN	NaN	-4.6	24.15	10.912	2
206	2009	10	30	17	56	44	734077	330.5	452	94	160	2.059	198	1.667	878	1	7	1	5.5	1	0.071	1	80.693	27	NaN	NaN	0.3	24.15	11.5	0
207	2009	10	30	18	18	54	734077	326.5	522	154	160	2.009	208	1.567	518	1	13	3	12.5	5	0.148	1	81.837	43	NaN	NaN	0.9	24.25	11.559	1
208	2009	10	30	18	36	14	734077	347	496	114	166	2.027	216	1.606	246	1	7	1	12.5	9.5	0.154	1	74.75	23	NaN	NaN	-2.7	24.2	11.566	0
209	2009	10	30	18	48	36	734077	357	484	98	160	2.2	226	1.577	352	1	7	1	15.5	7.5	0.117	1	69.155	23	NaN	NaN	3.5	24.2	10.637	0
210	2009	10	30	19	2	32	734077	354.5	520	134	166	2.127	220	1.602	358	1	11	1	12	4.5	0.153	1	69.404	23	NaN	NaN	0	24.2	10.823	0
211	2009	10	30	19	17	10	734077	359.5	580	174	172	2.035	234	1.53	360	1	13	5	22.5	9.5	0.185	1	66.616	23	NaN	NaN	2.5	24.25	10.865	1
212	2009	10	30	19	32	50	734077	365	494	102	172	2.116	220	1.659	260	1	9	1	9	3	0.135	1	63.029	19	NaN	NaN	2.6	24.25	10.544	0
213	2009	10	30	19	45	24	734077	368.5	522	126	162	2.241	234	1.575	314	1	9	1	16	5	0.151	1	59.016	27	NaN	NaN	2.2	24.25	10.48	0
214	2009	10	30	19	59	20	734077	375.5	622	230	170	2.176	222	1.691	348	1	9	1	11.5	5.5	0.237	1	57.002	33	NaN	NaN	1.5	24.2	10.268	0
215	2009	10	30	20	15	30	734077	379	600	206	164	2.29	230	1.641	432	1	17	1	15	3.5	0.2	1	53.901	25	NaN	NaN	5.7	24.3	10.05	0
216	2009	10	30	20	32	42	734077	374	566	170	168	2.214	228	1.64	368	1	11	1	8	2	0.182	1	51.875	23	NaN	NaN	6	24.25	10.085	2
217	2009	10	30	20	48	16	734077	368	544	166	162	2.259	216	1.699	348	1	3	1	4.5	2	0.186	1	57.057	31	NaN	NaN	5.2	24.2	10.069	0
218	2009	10	30	21	3	8	734077	368.5	624	186	158	2.297	280	1.316	242	1	5	7	8.5	5.5	0.215	1	55.12	25	NaN	NaN	5.1	24.2	10.063	0
219	2009	10	30	21	17	34	734077	369	562	186	162	2.262	214	1.717	808	1	11	1	9	2.5	0.136	1	52.513	23	NaN	NaN	3.8	24.15	10.059	1
220	2009	10	30	21	40	24	734077	379.5	562	170	162	2.302	230	1.648	7086	1	3	3	8	6.5	0.022	1	47.015	13	NaN	NaN	4.9	24.15	10.031	0
221	2009	10	30	23	47	52	734077	14.5	108	54	28	0.411	26	0.5	1124	1	3	1	6.5	3	0.044	0	161.241	17	173.8	NaN	NaN	24.45	20.325	5
222	2009	10	31	0	8	24	734077	36	146	56	48	0.552	42	0.667	110	1	1	1	17.5	9.5	0.219	0	105.888	11	125.5	NaN	NaN	24.3	17.952	1
223	2009	10	31	0	12	40	734077	31.5	172	82	54	0.565	36	0.625	292	1	5	1	12	9	0.177	0	98.065	29	129	NaN	NaN	24.45	18.061	1
224	2009	10	31	0	20	24	734077	40	174	80	50	0.75	44	0.648	132	1	5	1	16	11.5	0.261	0	78.787	17	112.8	NaN	NaN	24.35	17.567	2
225	2009	10	31	0	25	30	734077	44	232	122	62	0.508	48	0.917	110	1	5	1	33.5	20	0.357	0	76.181	31	105.8	NaN	NaN	24.35	17.889	2
226	2009	10	31	0	31	12	734077	162.5	348	8	236	0.674	104	1.563	388	7	1	1	3.5	3.5	0.011	0	41.4	1	101.3	NaN	NaN	24.35	14.35	0
227	2009	10	31	0	43	28	734077	30.5	184	104	38	0.763	42	0.548	76	1	5	1	11	7.5	0.4	0	76.632	33	96.3	NaN	NaN	24.35	17.868	1
228	2009	10	31	0	47	48	734077	51	216	108	36	1.417	72	0.694	120	1	7	1	39	18	0.321	0	67.577	27	94	NaN	NaN	24.3	17.135	1
229	2009	10	31	0	53	24	734077	31	196	120	28	0.911	48	0.563	150	1	5	1	11.5	5.5	0.347	0	76.18	31	98.5	NaN	NaN	24.15	17.59	0
230	2009	10	31	0	59	10	734077	35	208	120	38	0.855	50	0.55	266	1	5	1	12	7.5	0.253	0	74.791	39	97.3	NaN	NaN	24.2	17.393	1
231	2009	10	31	1	7	4	734077	81.5	316	130	134	0.429	52	1.567	222	13	9	1	106	56.5	0.242	0	60.898	29	95	NaN	NaN	24.3	17.077	1
232	2009	10	31	1	16	2	734077	69.5	210	114	52	1.327	44	1.409	238	1	9	1	29	7.5	0.254	0	50.871	19	101.5	NaN	NaN	24.2	16.669	0
233	2009	10	31	1	23	30	734077	112.5	254	76	104	0.808	74	1.52	662	5	13	1	50.5	29	0.083	0	42.731	3	95.5	NaN	NaN	24.15	15.932	1
234	2009	10	31	1	38	46	734077	148	280	4	182	0.794	94	1.548	606	13	1	1	6	3.5	0.005	0	44.75	1	100	NaN	NaN	24.15	14.8	0
235	2009	10	31	1	53	32	734077	53.5	254	162	50	0.8	42	1.048	364	1	17	1	98	28.5	0.262	0	68.57	31	100.5	NaN	NaN	24.1	16.996	0
236	2009	10	31	2	3	50	734077	37	172	90	44	0.807	38	0.697	280	1	1	1	12	10.5	0.199	0	75.723	21	95	NaN	NaN	24.05	17.213	0
237	2009	10	31	2	11	22	734077	137.5	240	2	132	1.042	106	1.297	244	3	1	1	0	0	0.004	0	41.625	1	103.5	NaN	NaN	24	14.85	0
238	2009	10	31	2	19	26	734077	275	366	38	154	1.782	174	1.578	930	5	3	1	2	0.5	0.029	0	37.2	1	104.3	NaN	NaN	24	12.283	0
239	2009	10	31	2	41	2	734077	51	130	8	48	1	74	0.689	120	1	3	1	4	3.5	0.032	0	64.45	3	101.8	NaN	NaN	23.95	16.7	0
240	2009	10	31	2	45	12	734077	27	82	26	20	1.25	36	0.667	1464	1	1	1	5	3	0.017	0	81.732	9	100.8	NaN	NaN	23.9	17.286	0
241	2009	10	31	3	10	58	734077	11	98	50	22	0.409	26	0.327	104	1	3	1	5.5	2.5	0.248	0	86.212	19	100.3	NaN	NaN	23.5	18.867	0
242	2009	10	31	3	14	20	734077	10	108	62	22	0.386	24	0.354	138	1	3	1	4	1.5	0.252	1	90.469	21	92.3	NaN	NaN	23.5	18.741	0
243	2009	10	31	3	18	26	734077	11	92	62	16	0.5	14	0.571	172	1	3	1	7	3	0.235	0	92.227	17	101.8	NaN	NaN	23.4	18.834	0
244	2009	10	31	3	22	50	734077	9	86	42	20	0.375	24	0.292	92	1	1	1	3.5	2	0.236	0	92.58	11	98	NaN	NaN	23	18.92	0
245	2009	10	31	3	25	48	734077	10	88	48	16	0.5	24	0.292	86	1	1	1	5	3	0.276	0	92.43	13	94.5	NaN	NaN	22.95	18.764	0
246	2009	10	31	3	28	42	734077	7.5	68	24	20	0.275	24	0.292	66	1	1	1	2.5	2	0.179	0	87.25	7	88.8	NaN	NaN	22.95	18.727	0
247	2009	10	31	3	30	56	734077	8	76	36	20	0.325	20	0.3	200	1	1	1	3.5	2	0.13	1	90.789	11	100.8	NaN	NaN	22.6	18.684	0
248	2009	10	31	3	35	32	734077	10.5	92	48	22	0.364	22	0.386	58	1	1	1	4.5	2.5	0.32	0	90.83	15	99.8	NaN	NaN	22.35	18.398	3
249	2009	10	31	3	38	2	734077	11.5	92	38	22	0.432	32	0.297	46	1	1	1	4	2	0.275	1	91.638	15	97	NaN	NaN	22.15	18.163	0
250	2009	10	31	3	40	20	734077	13	80	30	26	0.462	24	0.396	78	1	1	1	4.5	3.5	0.19	0	91.172	9	103.5	NaN	NaN	21.9	18.081	0
251	2009	10	31	3	42	58	734077	10.5	80	32	22	0.364	26	0.346	60	1	1	1	4	2.5	0.229	0	91.338	9	98.5	NaN	NaN	21.6	18.1	0
252	2009	10	31	3	45	18	734077	11	78	30	26	0.404	22	0.364	190	1	1	1	3.5	3	0.112	1	91.359	11	103.5	NaN	NaN	21.55	18.081	0
253	2009	10	31	3	49	46	734077	12	98	48	22	0.409	28	0.339	58	1	1	1	5.5	3	0.308	1	90.63	15	102.5	NaN	NaN	21.3	17.984	5
254	2009	10	31	3	52	22	734077	9.5	86	34	22	0.409	30	0.283	38	1	1	1	1.5	1	0.274	0	92.25	11	101.3	NaN	NaN	21.05	17.956	0
255	2009	10	31	3	54	26	734077	10.5	82	32	26	0.365	24	0.333	120	1	5	1	5.5	2.5	0.158	0	88.794	13	102	NaN	NaN	19.45	17.835	0
256	2009	10	31	3	57	48	734077	9	72	28	18	0.472	26	0.269	174	1	1	1	2.5	2	0.114	0	89.133	9	103.3	NaN	NaN	19.5	17.81	0
257	2009	10	31	4	1	54	734077	10.5	76	26	24	0.438	26	0.346	194	1	1	1	1.5	1.5	0.096	0	89.321	9	98.8	NaN	NaN	18.7	17.6	2
258	2009	10	31	4	6	24	734077	5	50	26	10	0.35	14	0.25	548	1	1	1	3	1.5	0.043	0	86.661	11	102.3	NaN	NaN	18.55	18.239	NaN
259	2009	10	31	4	16	22	734077	23	184	60	30	0.767	94	0.181	70	1	5	3	9	7	0.236	0	86.968	19	104.3	NaN	NaN	18.5	17.39	0
260	2009	10	31	4	20	36	734077	10.5	132	104	14	0.571	14	0.714	104	1	5	1	8	4	0.441	0	92.17	35	103.3	NaN	NaN	18.6	17.717	0
261	2009	10	31	4	24	32	734077	15.5	150	102	26	0.5	22	0.614	78	1	9	1	9.5	3	0.447	0	90.332	33	102.5	NaN	NaN	18.4	17.7	4
262	2009	10	31	4	28	20	734077	11	112	76	18	0.556	18	0.5	52	1	5	1	5	2	0.463	0	92.872	25	103	NaN	NaN	18.7	17.964	0
263	2009	10	31	4	31	4	734077	8	94	62	16	0.5	16	0.438	34	1	5	1	3	1	0.484	0	93.336	19	101	NaN	NaN	18.85	18.073	0
264	2009	10	31	4	33	12	734077	6	70	34	14	0.429	22	0.205	100860	1	1	1	1.5	1.5	0	0	92.778	15	101.8	NaN	NaN	18.95	18.539	0
265	2009	11	1	8	35	22	734078	5.5	138	38	92	0.049	8	0.688	22	3	7	1	4	1.5	0.237	1	84.063	13	88.5	NaN	NaN	19.8	19.677	0
266	2009	11	1	8	38	2	734078	7.5	66	42	14	0.536	10	0.7	46	1	3	1	1.5	1	0.375	0	77.477	15	97	NaN	NaN	20.4	19.63	0
267	2009	11	1	8	39	54	734078	7	166	144	10	0.65	12	0.5	104	1	9	1	6.5	1.5	0.533	1	75.558	47	95.3	NaN	NaN	20.5	19.653	0
268	2009	11	1	8	44	24	734078	10	190	152	14	0.536	24	0.354	304	1	11	1	10	2.5	0.308	0	75.552	37	89.8	NaN	NaN	21.5	20.17	0
269	2009	11	1	8	52	38	734078	19	106	48	30	0.45	28	0.679	1824	1	3	1	6.5	5.5	0.025	0	68.66	11	80.5	NaN	NaN	21.25	19.792	0
270	2009	11	1	9	24	48	734078	25.5	84	14	36	0.639	34	0.735	522	1	1	1	3	2.5	0.023	0	56.813	3	81.3	NaN	NaN	22	19.438	0
271	2009	11	1	9	34	54	734078	25	112	52	32	0.719	28	0.804	56	1	3	1	10.5	5	0.31	1	54.593	13	76.8	NaN	NaN	23.55	19.691	2
272	2009	11	1	9	37	42	734078	27.5	98	38	28	0.964	32	0.797	140	1	5	1	8.5	3	0.16	0	52.813	9	75	NaN	NaN	23.55	19.46	0
273	2009	11	1	9	41	40	734078	24.5	86	30	30	0.817	26	0.769	30	1	1	1	4.5	4.5	0.259	0	54.766	7	70	NaN	NaN	23.6	19.859	1
274	2009	11	1	9	43	36	734078	23.5	110	58	26	0.904	26	0.827	34	1	5	1	4	2.5	0.403	1	55.217	9	73.3	NaN	NaN	23.55	19.4	0
275	2009	11	1	9	46	0	734078	29.5	118	40	24	1.229	54	0.417	66	1	3	3	9	7	0.217	0	51.44	9	67.5	NaN	NaN	23.55	18.519	1
276	2009	11	1	9	49	4	734078	36	84	22	30	1.2	32	0.828	50	1	1	1	9.5	9.5	0.164	0	49.542	3	76	NaN	NaN	23.55	18.333	2
277	2009	11	1	9	51	18	734078	29.5	114	40	32	0.859	42	0.702	68	1	5	1	11	4	0.22	0	50.143	7	75.8	NaN	NaN	23.5	18.7	0
278	2009	11	1	9	54	20	734078	28	144	68	28	1	48	0.469	82	1	3	3	12.5	9	0.301	1	50.393	15	72.8	NaN	NaN	23.5	19.634	1
279	2009	11	1	9	58	6	734078	26.5	130	80	30	0.783	20	0.95	104	1	7	1	20.5	8.5	0.342	1	49.713	23	71.5	NaN	NaN	23.5	20.21	0
280	2009	11	1	10	2	0	734078	27.5	124	56	36	0.75	32	0.656	68	1	1	1	7	6.5	0.292	1	49.138	11	68.8	NaN	NaN	23.5	19.619	2
281	2009	11	1	10	5	12	734078	29.5	152	82	30	0.95	40	0.575	88	1	9	1	22.5	11.5	0.342	1	46.762	21	67.5	NaN	NaN	23.5	19.969	4
282	2009	11	1	10	9	12	734078	16	114	62	22	0.705	30	0.4	38	1	7	1	9.5	4.5	0.408	0	52.164	9	68	NaN	NaN	23.5	21.039	5
283	2009	11	1	10	11	44	734078	16	102	38	22	0.591	42	0.31	180	1	1	1	6	3	0.135	1	50.913	5	64.3	NaN	NaN	23.55	21.05	5
284	2009	11	1	10	16	26	734078	12.5	98	52	14	0.714	32	0.281	514	1	1	1	6	3.5	0.085	0	51.13	3	59.5	NaN	NaN	23.55	21.861	6
285	2009	11	1	10	26	38	734078	14	96	44	20	0.5	32	0.313	208	1	1	1	8	4	0.145	0	45.489	3	51.5	NaN	NaN	23.5	21.637	4
286	2009	11	1	10	31	42	734078	13.5	104	40	30	0.45	34	0.294	238	1	5	1	5.5	3.5	0.117	1	48.893	3	54	NaN	NaN	23.45	22.052	6
287	2009	11	1	10	37	24	734078	12	116	66	18	0.528	32	0.297	866	1	3	1	6	2.5	0.067	0	41.743	5	53	NaN	NaN	23.35	23.201	NaN
288	2009	11	1	10	53	46	734078	23.5	72	18	30	0.783	24	0.917	226	1	1	1	1.5	1.5	0.06	0	50.825	3	67.5	NaN	NaN	23.35	20.135	8
289	2009	11	1	10	58	44	734078	25	134	70	28	0.893	36	0.514	492	1	5	1	11.5	8.5	0.112	1	60.063	23	75.5	NaN	NaN	23.3	21.403	7
290	2009	11	1	11	9	10	734078	42	130	24	56	0.75	50	0.68	350	1	1	1	8	8	0.05	0	72.519	7	98	NaN	NaN	23.3	17.796	9
291	2009	11	1	11	17	10	734078	69.5	136	4	60	1.15	72	0.965	788	1	1	1	0.5	0.5	0.004	0	75.333	1	111.5	NaN	NaN	23.25	15.7	10
292	2009	11	1	11	32	34	734078	31.5	126	40	42	0.738	44	0.534	62	1	3	1	9.5	8	0.213	0	128.036	13	148.8	NaN	NaN	23.35	18.388	8
293	2009	11	1	11	35	42	734078	42.5	104	6	44	0.966	54	0.75	194	1	1	1	2	2	0.02	0	123.625	3	154.5	NaN	NaN	23.35	16.825	7
294	2009	11	1	11	40	40	734078	52	116	16	40	1.275	60	0.858	56	1	1	1	1.5	1	0.093	0	128.028	7	162	NaN	NaN	23.35	16.106	0
295	2009	11	1	11	43	32	734078	297.5	364	4	144	2.045	216	1.37	372	1	1	1	4.5	3	0.005	0	47.25	1	155.5	NaN	NaN	23.35	10.367	4
296	2009	11	1	11	55	48	734078	414.5	486	60	192	2.159	234	1.754	116	1	3	1	5	4	0.1	0	36.282	1	153.8	NaN	NaN	23.35	8.553	5
297	2009	11	1	12	5	50	734079	8.5	62	24	20	0.425	18	0.417	54	1	1	1	1	1	0.207	0	165.154	9	179.3	NaN	NaN	23.35	23.35	NaN
298	2009	11	1	12	7	46	734079	15	70	18	22	0.636	30	0.433	232	1	1	1	3	2	0.06	0	165.125	7	182	-0.568	7.7	23.35	21.24	4
299	2009	11	1	12	12	48	734079	373	492	106	166	2.244	220	1.695	334	1	7	1	3.5	1	0.128	0	38.495	1	NaN	NaN	-0.5	23.35	9.198	5
300	2009	11	1	12	26	34	734079	372	476	106	164	2.229	206	1.786	242	1	5	1	14.5	8	0.148	1	40.81	1	NaN	NaN	4.1	23.3	9.819	5
301	2009	11	1	12	38	32	734079	329.5	440	108	152	2.168	180	1.778	182	1	7	1	13.5	10	0.174	0	55.923	15	NaN	NaN	-1	23.3	11.086	4
302	2009	11	1	12	48	54	734079	305	382	68	140	2.175	174	1.741	148	1	15	1	11.5	3	0.128	1	64.464	15	NaN	NaN	4.5	23.3	11.393	2
303	2009	11	1	12	57	44	734079	301.5	406	96	134	2.224	176	1.707	182	1	15	1	12.5	3.5	0.163	1	68.051	25	NaN	NaN	5.2	23.3	11.378	5
304	2009	11	1	13	7	32	734079	309	408	96	136	2.239	176	1.756	190	1	9	1	9.5	5	0.161	1	67.138	23	NaN	NaN	-0.3	23.25	10.844	4
305	2009	11	1	13	17	30	734079	314	410	96	134	2.313	180	1.742	200	1	9	1	10.5	4	0.157	1	66.281	27	NaN	NaN	2.8	23.25	10.778	6
306	2009	11	1	13	27	40	734079	319.5	442	108	142	2.215	192	1.661	282	1	5	1	7.5	5.5	0.149	1	64.191	27	NaN	NaN	1.6	23.25	10.574	5
307	2009	11	1	13	39	44	734079	319	390	60	142	2.232	188	1.697	252	1	9	1	7	2	0.093	1	62.177	17	NaN	NaN	-0.7	23.3	10.442	6
308	2009	11	1	13	50	26	734079	319.5	444	110	140	2.268	194	1.647	246	1	15	1	13	3	0.159	1	63.545	31	NaN	NaN	1.4	23.3	10.418	9
309	2009	11	1	14	1	56	734079	319	404	76	142	2.229	186	1.712	228	1	13	1	11	2.5	0.12	1	61.051	19	NaN	NaN	1.8	23.3	10.418	6
310	2009	11	1	14	12	28	734079	320.5	414	86	140	2.268	188	1.705	248	1	11	1	10	3	0.13	1	64.017	25	NaN	NaN	1.6	23.3	10.397	7
311	2009	11	1	14	23	30	734079	319.5	404	82	140	2.279	182	1.753	292	1	7	1	5	1.5	0.118	1	67.119	17	NaN	NaN	1.2	23.3	10.4	7
312	2009	11	1	14	35	6	734079	326	468	118	144	2.208	206	1.57	374	1	13	1	19	8	0.14	1	64.617	27	163.3	0.644	6.1	23.35	10.4	5
313	2009	11	1	14	49	8	734079	330.5	408	64	150	2.203	194	1.652	264	1	9	1	16	11	0.095	1	68.508	19	NaN	NaN	2.3	23.35	10.455	1
314	2009	11	1	15	0	20	734079	323.5	426	88	140	2.25	198	1.619	272	1	7	1	14.5	8.5	0.126	1	72.967	25	NaN	NaN	0.2	23.35	10.444	8
315	2009	11	1	15	11	58	734079	324.5	470	130	140	2.264	200	1.623	354	1	5	1	12	7.5	0.158	1	74.701	33	NaN	NaN	1.3	23.35	10.412	6
316	2009	11	1	15	25	42	734079	340.5	498	154	154	2.192	190	1.692	382	1	5	1	25	19	0.175	1	71.202	25	NaN	NaN	2.1	23.4	10.401	0
317	2009	11	1	15	40	22	734079	318.5	446	110	144	2.177	192	1.659	394	1	3	1	10	5	0.131	1	75.281	31	NaN	NaN	3.2	23.4	10.493	1
318	2009	11	1	15	54	22	734079	304.5	472	194	140	2.171	138	1.551	224	1	13	1	109.5	95.5	0.279	1	84.893	53	NaN	NaN	0.2	23.4	11.371	2
319	2009	11	1	16	5	58	734079	5	36	14	10	0.35	12	0.292	162	1	3	1	4	1.5	0.071	0	206.094	5	214	NaN	NaN	23.4	23.35	NaN
320	2009	11	1	16	9	16	734079	299	448	122	138	2.134	188	1.59	352	1	13	1	11.5	4.5	0.153	0	83.238	27	NaN	NaN	3.7	23.45	10.789	0
321	2009	11	1	16	22	36	734079	303	436	102	142	2.099	192	1.578	334	1	3	1	7	5	0.132	1	83.519	25	NaN	NaN	1.3	23.4	10.7	0
322	2009	11	1	16	35	26	734079	305	476	134	144	2.09	198	1.54	416	1	9	1	16	4	0.15	1	85.309	47	NaN	NaN	2.8	23.45	10.65	0
323	2009	11	1	16	50	18	734079	19.5	124	4	54	0.352	66	0.273	164	1	1	7	2	1.5	0.014	0	199.333	1	208	NaN	NaN	23.5	20.95	10
324	2009	11	1	16	55	6	734079	297.5	396	58	168	1.762	170	1.75	152	1	7	1	4.5	1.5	0.106	0	90.233	13	NaN	NaN	-5.4	23.5	10.75	0
325	2009	11	1	17	4	14	734079	299.5	450	138	132	2.239	180	1.656	196	1	19	1	27.5	4.5	0.214	1	86.775	39	NaN	NaN	4.5	23.55	10.757	0
326	2009	11	1	17	15	0	734079	294.5	506	202	134	2.183	170	1.724	292	1	9	1	8.5	2	0.253	1	89.887	47	NaN	NaN	3.8	23.5	10.8	0
327	2009	11	1	17	28	18	734079	296	512	194	138	2.109	180	1.644	288	1	13	1	12	5	0.242	1	90.133	45	NaN	NaN	3.7	23.55	10.817	0
328	2009	11	1	17	41	38	734079	297	430	110	136	2.154	184	1.614	248	1	7	1	10	4	0.162	1	89.246	39	NaN	NaN	-0.6	23.55	10.796	0
329	2009	11	1	17	52	56	734079	297.5	378	64	134	2.205	180	1.65	214	1	7	1	8.5	2.5	0.108	1	90.636	19	NaN	NaN	3	23.6	10.733	1
330	2009	11	1	18	2	48	734079	298	430	102	134	2.198	194	1.536	280	1	13	1	13.5	4	0.144	1	88.413	35	NaN	NaN	-0.6	23.6	10.812	1
331	2009	11	1	18	14	38	734079	294	434	126	130	2.258	178	1.646	234	1	9	1	10.5	2.5	0.189	1	92.508	37	NaN	NaN	3.5	23.65	10.85	0
332	2009	11	1	18	25	46	734079	295.5	450	142	134	2.172	174	1.698	228	1	9	1	11.5	5	0.209	1	90.833	31	NaN	NaN	3.7	23.6	10.837	0
333	2009	11	1	18	37	4	734079	299	434	106	136	2.18	192	1.557	324	1	13	1	12.5	3.5	0.14	1	86.287	37	NaN	NaN	-0.6	23.6	10.772	0
334	2009	11	1	18	49	42	734079	302.5	420	102	136	2.202	182	1.659	236	1	7	1	8.5	3	0.155	1	86.207	27	NaN	NaN	0	23.6	10.671	0
335	2009	11	1	19	0	38	734079	308.5	438	106	140	2.168	192	1.607	306	1	7	1	8	5	0.142	1	83.134	31	NaN	NaN	2.2	23.6	10.598	0
336	2009	11	1	19	13	2	734079	313	422	88	142	2.18	192	1.63	274	1	15	1	12.5	3.5	0.126	1	80.422	23	NaN	NaN	2.6	23.6	10.521	0
337	2009	11	1	19	24	38	734079	318.5	446	96	142	2.211	208	1.531	286	1	7	3	8.5	5	0.131	1	79.133	31	NaN	NaN	2.1	23.55	10.515	2
338	2009	11	1	19	36	50	734079	320.5	412	78	140	2.261	194	1.649	280	1	7	1	7.5	4	0.113	1	78.612	23	NaN	NaN	2.9	23.55	10.504	0
339	2009	11	1	19	48	22	734079	325.5	408	62	146	2.202	200	1.627	272	1	7	1	8	4	0.091	1	71.453	17	NaN	NaN	2.2	23.55	10.5	0
340	2009	11	1	19	59	42	734079	329	446	92	148	2.203	206	1.597	288	1	7	1	6	3	0.125	1	68.479	15	NaN	NaN	4	23.55	10.467	0
341	2009	11	1	20	11	56	734079	331.5	442	76	150	2.197	216	1.535	264	1	5	3	4	2	0.108	1	63.417	17	NaN	NaN	4.6	23.55	10.382	1
342	2009	11	1	20	23	42	734079	336	458	104	150	2.21	204	1.647	308	1	5	1	6.5	4.5	0.136	1	63.92	23	180.4	-1.829	6.9	23.55	10.354	0
343	2009	11	1	20	36	28	734079	338	472	106	146	2.291	220	1.536	254	1	9	3	8.5	3.5	0.146	1	62.102	15	NaN	NaN	5.9	23.55	10.35	1
344	2009	11	1	20	48	34	734079	341	430	70	152	2.22	208	1.637	218	1	9	1	9	3.5	0.108	1	58.458	15	NaN	NaN	4.6	23.55	10.35	0
345	2009	11	1	20	59	22	734079	341	466	106	150	2.247	210	1.624	294	1	7	1	7	4	0.139	1	57.75	21	NaN	NaN	5.6	23.5	10.35	0
346	2009	11	1	21	12	2	734079	340	462	94	154	2.198	214	1.586	296	1	15	1	10	2	0.124	1	59.01	27	NaN	NaN	5.6	23.55	10.386	1
347	2009	11	1	21	24	40	734079	342	458	84	152	2.227	222	1.538	258	1	5	3	6	3.5	0.117	1	58.779	17	NaN	NaN	5.5	23.55	10.35	1
348	2009	11	1	21	36	36	734079	342	482	134	154	2.211	194	1.655	244	1	11	1	39.5	27.5	0.185	1	58.213	17	171	1.292	8.1	23.6	10.35	1
349	2009	11	1	21	48	42	734079	341.5	462	102	152	2.23	208	1.642	268	1	7	1	8.5	2.5	0.14	1	56.875	19	NaN	NaN	2.1	23.65	10.348	2
350	2009	11	1	22	0	52	734079	341.5	454	86	152	2.23	216	1.581	270	1	11	3	8.5	2.5	0.119	1	57.614	21	NaN	NaN	2.7	23.35	10.35	1
351	2009	11	1	22	12	56	734079	339.5	464	92	152	2.224	220	1.541	276	1	13	5	9	2	0.124	1	56.505	21	NaN	NaN	4	23.6	10.35	1
352	2009	11	1	22	25	16	734079	337.5	486	126	150	2.227	210	1.607	300	1	17	1	12.5	3.5	0.16	1	53.438	23	156.4	0.422	8.5	23.65	10.4	1
353	2009	11	1	22	38	22	734079	337.5	494	150	150	2.23	194	1.737	240	1	9	1	8.5	3	0.204	1	52.793	27	157.7	0.606	7.9	23.6	10.45	3
354	2009	11	1	22	50	36	734079	5.5	42	18	10	0.45	14	0.357	174	1	3	1	2.5	1.5	0.083	0	190.5	5	199.8	NaN	NaN	23.55	23.55	NaN
355	2009	11	1	22	54	12	734079	338.5	510	154	150	2.233	206	1.643	184	1	11	1	10.5	3.5	0.222	0	49.231	15	163	1.678	10.3	23.55	10.365	1
356	2009	11	1	23	5	46	734079	5	36	8	20	0.25	8	0.438	136	1	1	1	1.5	1.5	0.047	0	186.15	5	195.5	NaN	NaN	23.55	23.55	NaN
357	2009	11	1	23	8	38	734079	340	524	170	148	2.277	206	1.65	144	1	13	1	10	3	0.254	0	46.137	15	NaN	NaN	3.8	23.55	10.353	1
358	2009	11	1	23	19	46	734079	5	40	8	22	0.227	10	0.45	638	3	3	1	1.5	1	0.012	0	176.2	3	166.5	NaN	NaN	23.55	23.55	NaN
359	2009	11	1	23	31	4	734079	5	38	12	12	0.417	14	0.321	502	1	1	1	0.5	0.5	0.022	1	172.857	5	175.8	NaN	NaN	23.55	23.55	NaN
360	2009	11	1	23	40	4	734079	6	66	34	22	0.205	10	0.45	340	1	5	1	6	2.5	0.084	0	168.417	11	172.5	NaN	NaN	23.55	23.55	NaN
361	2009	11	1	23	46	50	734079	6.5	114	64	12	0.458	38	0.145	80	1	5	3	5	2	0.33	1	153.917	17	170.8	NaN	NaN	23.5	23.498	NaN
362	2009	11	1	23	50	4	734079	5	64	26	24	0.167	14	0.321	730	1	3	1	2.5	1.5	0.033	0	155.446	7	160.3	NaN	NaN	23.55	23.55	NaN
363	2009	11	2	0	3	18	734079	12	104	12	68	0.169	24	0.5	78	3	1	1	0.5	0.5	0.066	0	124.607	3	133.8	NaN	NaN	23.5	23.014	7
364	2009	11	2	0	6	20	734079	12	92	34	32	0.266	26	0.385	490	1	3	1	6.5	3.5	0.058	1	119	7	125	NaN	NaN	23.5	22.733	5
365	2009	11	2	0	16	2	734079	54.5	176	32	56	0.813	88	0.619	192	1	1	1	9	9	0.087	0	72.235	5	114.5	NaN	NaN	23.5	16.344	5
366	2009	11	2	0	22	10	734079	46.5	196	124	26	1.308	46	0.793	46	1	5	1	24.5	12.5	0.512	0	66.079	15	95.5	NaN	NaN	23.5	16.66	1
367	2009	11	2	0	26	12	734079	50.5	160	8	52	0.971	100	0.48	4	3	1	9	2.5	2.5	0.049	1	53.55	5	95.8	NaN	NaN	23.4	16.35	4
368	2009	11	2	0	28	56	734079	8.5	12	0	6	1.417	6	1.417	162	1	1	1	0	0	0	0	74.25	1	85.5	NaN	NaN	23.5	23.3	3
369	2009	11	2	0	31	50	734079	36.5	148	50	42	0.81	56	0.652	90	1	3	1	14.5	8.5	0.21	0	62.577	5	87	NaN	NaN	23.5	17.298	5
370	2009	11	2	0	35	48	734079	222.5	310	4	164	1.351	142	1.549	2766	5	1	1	3.5	2.5	0.001	0	39.75	1	86	NaN	NaN	23.45	12.833	1
371	2009	11	2	1	27	4	734079	122	176	4	70	1.729	102	1.196	5880	1	1	1	1	1	0.001	0	43.917	1	85.3	NaN	NaN	23.5	14.3	1
372	2009	11	2	3	8	0	734079	78.5	188	24	82	0.957	82	0.793	2106	1	1	1	13.5	13.5	0.01	0	53.769	3	93.3	NaN	NaN	23.45	15.492	6
373	2009	11	2	3	46	14	734079	216.5	356	12	190	1.126	154	1.393	7258	5	3	1	8.5	4.5	0.002	0	36.321	1	89	NaN	NaN	23.4	12.671	4
374	2009	11	2	5	53	8	734079	252.5	402	66	130	1.935	206	1.226	394	1	3	5	2	1	0.083	0	36.324	1	80.8	NaN	NaN	23.3	12.35	10
375	2009	11	2	6	6	24	734079	220	278	2	96	2.286	180	1.222	160	1	1	1	0.5	0.5	0.005	0	41.625	1	78.3	NaN	NaN	23.3	12.45	3
376	2009	11	2	6	13	42	734079	169	308	76	108	1.102	124	1.363	178	5	5	1	54	50	0.156	0	39.846	7	82	NaN	NaN	23.3	14.068	6
377	2009	11	2	6	21	48	734079	249	348	20	108	1.88	220	1.132	236	1	3	9	47	46.5	0.034	0	39.545	3	102.8	NaN	NaN	23.3	12.436	8
378	2009	11	2	6	31	32	734079	248.5	290	2	106	2.344	182	1.363	228	1	1	1	0.5	0.5	0.004	1	39.75	1	107	NaN	NaN	23.25	12.25	8
379	2009	11	2	6	40	10	734079	242.5	416	88	118	1.703	210	0.817	432	1	3	11	118.5	74	0.104	1	37.628	1	103.5	NaN	NaN	23.3	12.548	6
380	2009	11	2	6	54	18	734079	242.5	360	4	188	1.266	168	1.438	454	9	1	1	5.5	4.5	0.005	1	35.5	1	81.8	NaN	NaN	23.35	12.2	4
381	2009	11	2	7	7	52	734079	104.5	266	108	74	1.365	84	0.97	342	1	11	5	50.5	23	0.178	0	45.191	9	80.5	NaN	NaN	23.35	14.726	6
382	2009	11	2	7	18	0	734079	242.5	356	78	112	2.152	166	1.461	856	1	5	1	4.5	1.5	0.064	0	36.813	3	107.8	NaN	NaN	23.3	12.25	4
383	2009	11	2	7	38	12	734079	242.5	310	2	124	1.952	184	1.318	462	1	1	3	0.5	0.5	0.003	1	40.5	1	85	NaN	NaN	23.35	12.2	5
384	2009	11	2	7	51	4	734079	138.5	296	126	94	1.277	76	1.401	430	1	9	1	55.5	32.5	0.174	0	38.973	9	86	NaN	NaN	23.35	14.268	5
385	2009	11	2	8	3	10	734079	230.5	330	32	136	1.423	162	1.423	670	1	5	1	41	38	0.032	0	37.515	5	78.3	NaN	NaN	23.35	12.274	5
386	2009	11	2	8	19	50	734079	64.5	236	74	60	0.875	102	0.49	538	1	1	1	26.5	14.5	0.096	0	60.566	11	96.5	NaN	NaN	23.35	17.112	10
387	2009	11	2	8	32	44	734079	240.5	326	2	148	1.625	176	1.364	524	1	1	1	0.5	0.5	0.002	0	38.75	1	97.8	NaN	NaN	23.35	12.2	1
388	2009	11	2	8	46	54	734079	242.5	360	50	124	1.94	186	1.301	434	3	5	3	4.5	2.5	0.063	1	37.529	1	102	NaN	NaN	23.35	12.192	2
389	2009	11	2	9	0	8	734079	60	268	130	60	0.85	78	0.75	70	1	7	1	31.5	11.5	0.385	0	61.735	9	98.5	NaN	NaN	23.35	17.161	5
390	2009	11	2	9	5	46	734079	132.5	278	4	170	0.779	104	1.274	126	3	1	1	0	0	0.01	0	40.083	1	99.8	NaN	NaN	23.3	14.4	8
391	2009	11	2	9	12	30	734079	136.5	284	14	178	0.688	92	1.484	236	11	1	1	14	14	0.027	1	40	1	100.5	NaN	NaN	23.35	14.438	8
392	2009	11	2	9	21	10	734079	57	192	4	126	0.433	62	0.879	142	3	1	1	5	2.5	0.012	0	54.75	1	98.3	NaN	NaN	23.35	16.867	5
393	2009	11	2	9	26	44	734079	159	274	4	156	1.01	114	1.386	176	5	1	1	2.5	1.5	0.009	0	39.5	1	75.8	NaN	NaN	23.35	14.15	7
394	2009	11	2	9	34	14	734079	156	266	20	124	1.077	122	1.279	216	5	1	1	22.5	22.5	0.041	1	38.955	1	86	NaN	NaN	23.35	14.273	8
395	2009	11	2	9	42	16	734079	31	224	160	28	0.946	36	0.625	72	1	7	1	17	8.5	0.541	0	73.086	27	72.8	NaN	NaN	23.35	18.955	5
396	2009	11	2	9	47	12	734079	223.5	316	2	154	1.448	160	1.397	228	5	1	1	0.5	0.5	0.004	0	37.375	1	91.5	NaN	NaN	23.35	12.175	4
397	2009	11	2	9	56	16	734079	196	272	2	124	1.581	146	1.339	184	3	1	1	0.5	0.5	0.004	0	39.375	1	77.5	NaN	NaN	23.3	13.35	5
398	2009	11	2	10	3	52	734079	32	146	84	24	0.938	38	0.632	64	1	5	3	20.5	10	0.4	0	64.703	11	82	NaN	NaN	23.35	20.579	4
399	2009	11	2	10	7	22	734079	131.5	242	4	140	0.936	98	1.321	174	5	1	1	2.5	2	0.01	0	38	1	78	NaN	NaN	23.3	14.467	6
400	2009	11	2	10	14	18	734079	54.5	236	108	86	0.552	42	0.917	82	1	7	3	73	23	0.34	0	52.482	9	85.5	NaN	NaN	23.35	17.41	2
401	2009	11	2	10	19	36	734079	54.5	202	70	66	0.742	66	0.826	72	1	5	1	32.5	18	0.255	1	51.528	9	88.8	NaN	NaN	23.3	17.213	3
402	2009	11	2	10	24	10	734079	30.5	168	88	34	0.632	46	0.489	102	1	1	1	17	9	0.326	0	62.817	13	88.5	NaN	NaN	23.3	19.261	2
403	2009	11	2	10	28	40	734079	25.5	136	90	32	0.703	14	1.607	22	1	7	1	10	3	0.57	0	63.109	17	82.5	NaN	NaN	23.3	19.666	2
404	2009	11	2	10	31	18	734079	170	206	4	88	1.915	114	1.474	158	1	1	1	3.5	2	0.011	0	38.75	1	77.3	NaN	NaN	23.3	14.167	1
405	2009	11	2	10	37	22	734079	22.5	138	82	24	0.875	32	0.703	160	1	5	1	5.5	1.5	0.275	0	63.173	17	87.8	NaN	NaN	23.25	19.533	2
406	2009	11	2	10	42	20	734079	50	146	84	38	0.974	24	1.458	52	1	3	3	36	19	0.424	0	50.145	15	81.3	NaN	NaN	23.25	17.465	0
407	2009	11	2	10	45	38	734079	56	106	2	56	1	48	1.167	114	9	1	1	0	0	0.009	0	45.5	1	81.3	NaN	NaN	23.25	17	5
408	2009	11	2	10	49	18	734079	192	250	4	114	1.68	132	1.455	194	5	1	1	0.5	0.5	0.009	0	35.667	1	84.8	NaN	NaN	23.25	13.917	2
409	2009	11	2	10	56	42	734079	185.5	268	34	112	1.433	122	1.475	170	3	1	1	30.5	25	0.078	1	39.181	1	74.8	NaN	NaN	23.25	14.119	1
410	2009	11	2	11	4	0	734079	202	278	4	130	1.515	144	1.385	184	5	1	1	7.5	5	0.009	1	42.417	1	93.8	NaN	NaN	23.2	13.783	1
411	2009	11	2	11	11	42	734079	163.5	306	4	190	0.855	112	1.446	220	5	1	1	2.5	1.5	0.008	0	47.583	1	108.8	NaN	NaN	23.25	14.35	0
412	2009	11	2	11	20	28	734079	197.5	352	70	130	1.519	152	1.145	126	1	3	1	27.5	25.5	0.146	0	56.729	3	119.8	NaN	NaN	23.25	14.075	0
413	2009	11	2	11	28	26	734079	104.5	264	92	62	1.339	110	0.932	80	1	3	1	33.5	26.5	0.267	0	103.761	37	154.8	NaN	NaN	23.2	15.416	3
414	2009	11	2	11	34	10	734079	282	524	218	132	1.909	174	1.557	254	1	15	1	178	50.5	0.28	0	50.493	25	134.5	NaN	NaN	23.2	11.837	4
415	2009	11	2	11	47	8	734079	283	456	98	158	1.785	200	1.415	282	1	15	1	10	2	0.133	1	55.21	17	164	NaN	NaN	23.2	11.353	0
416	2009	11	2	11	59	26	734079	287	490	158	140	2.014	192	1.495	296	1	7	1	9	5	0.201	1	55.631	23	176.5	NaN	NaN	23.2	11.351	3
417	2009	11	2	12	12	32	734080	290.5	494	166	142	2.025	186	1.562	268	1	9	1	9	3	0.218	1	56.491	29	179.3	NaN	NaN	23.15	11.349	1
418	2009	11	2	12	25	14	734080	293.5	432	106	142	2.042	184	1.595	1520	1	9	1	7.5	3.5	0.054	1	61.463	23	NaN	NaN	-0.6	23.2	11.35	0
419	2009	11	2	12	57	46	734080	290	532	218	136	2.114	178	1.626	204	1	13	1	11	2.5	0.296	1	72.998	37	NaN	NaN	1.3	23	11.535	2
420	2009	11	2	13	10	2	734080	288.5	454	142	132	2.17	180	1.603	368	1	9	1	6	2	0.173	1	74.875	25	NaN	NaN	-2.3	23.1	11.515	0
421	2009	11	2	13	23	44	734080	285	468	158	132	2.148	178	1.598	292	1	11	1	8	1.5	0.208	1	74.334	33	NaN	NaN	-7.6	22.9	11.496	0
422	2009	11	2	13	36	24	734080	283.5	456	142	138	2.029	176	1.611	364	1	7	1	9	3.5	0.173	1	79.201	29	NaN	NaN	-1.3	22.95	11.517	2
423	2009	11	2	13	50	4	734080	284	516	214	132	2.129	170	1.671	1138	1	13	1	9	3	0.129	1	82.725	61	NaN	NaN	-2.5	23.15	11.589	0
424	2009	11	2	14	17	38	734080	267.5	456	150	138	1.92	168	1.592	152	1	9	1	8	2	0.247	1	94.507	43	NaN	NaN	1.6	23.05	11.707	0
425	2009	11	2	14	27	46	734080	6.5	20	6	8	0.688	6	1.083	24	1	1	1	1	1	0.136	0	193.625	3	209.5	NaN	NaN	23.15	22.962	0
426	2009	11	2	14	28	30	734080	9	16	0	8	1.125	8	1.125	7866	3	1	1	0	0	0	0	202.75	1	208.8	NaN	NaN	23.15	22.3	2
427	2009	11	2	16	39	52	734080	266.5	484	210	114	2.303	160	1.656	276	1	13	1	12.5	4.5	0.276	0	98.542	63	NaN	NaN	-0.8	23.45	11.722	4
428	2009	11	2	16	52	32	734080	182.5	236	40	80	2.069	116	1.543	74	1	5	1	24.5	18	0.129	0	126.5	11	NaN	NaN	1.3	23.4	13.526	5
429	2009	11	2	16	57	42	734080	262	422	154	108	2.38	160	1.634	170	1	5	1	8.5	5	0.26	0	99.933	39	NaN	NaN	-2.4	23.4	11.801	3
430	2009	11	2	17	7	34	734080	259	492	210	126	2.036	156	1.654	1970	1	21	1	20.5	3.5	0.085	1	102.83	61	NaN	NaN	-1.2	23.4	11.826	0
431	2009	11	2	17	48	36	734080	288	444	130	132	2.182	182	1.555	312	1	13	1	17	6	0.172	0	92.076	41	NaN	NaN	2.2	23.4	11.665	0
432	2009	11	2	18	1	12	734080	274.5	414	118	124	2.181	172	1.593	240	1	13	1	13.5	4	0.18	1	95.446	37	NaN	NaN	-5.6	23.5	11.693	0
433	2009	11	2	18	12	6	734080	284.5	402	100	130	2.127	172	1.651	314	1	11	1	13.5	8	0.14	1	93.26	29	NaN	NaN	0.1	23.5	11.648	1
434	2009	11	2	18	24	2	734080	286.5	418	102	130	2.204	186	1.5	488	1	3	1	11.5	8.5	0.113	1	95.149	29	NaN	NaN	-0.4	23.55	11.717	1
435	2009	11	2	18	39	8	734080	288	498	178	128	2.23	192	1.474	472	1	19	1	27.5	8	0.184	1	93.833	51	NaN	NaN	-2.6	23.6	11.734	3
436	2009	11	2	18	55	18	734080	264	396	114	122	2.152	160	1.503	5168	1	9	1	36	23.5	0.02	1	104.582	25	NaN	NaN	0.1	23.65	12.969	1
437	2009	11	2	20	28	2	734080	6	30	12	12	0.458	6	1	7056	3	1	1	0.5	0.5	0.002	0	206.5	1	211.5	NaN	NaN	23.25	22.7	0
438	2009	11	2	22	26	8	734080	5	28	4	8	0.625	16	0.313	310	1	1	1	0	0	0.012	0	183.5	1	206.5	NaN	NaN	23.05	23.033	NaN
439	2009	11	2	22	31	46	734080	6	76	26	14	0.321	36	0.139	196	3	3	5	5.5	3	0.096	0	193.911	7	206	NaN	NaN	23.05	23.154	NaN
440	2009	11	2	22	36	18	734080	7.5	58	6	30	0.25	22	0.295	32632	1	1	3	1	1	0	0	193.313	1	203.8	NaN	NaN	23.1	23.1	NaN
441	2009	11	3	7	41	8	734080	14	142	50	72	0.139	20	0.575	2628	5	5	1	9.5	4	0.018	0	82.962	19	95.5	NaN	NaN	22.95	22.896	NaN
442	2009	11	3	8	27	18	734080	36	204	100	52	0.577	52	0.558	460	1	5	1	15	7	0.151	0	71.137	23	92.5	NaN	NaN	23.2	22.482	15
443	2009	11	3	8	38	22	734080	36	168	60	66	0.515	42	0.75	818	1	3	1	7.5	4.5	0.061	1	67.871	13	95.3	NaN	NaN	23.2	22.324	14
444	2009	11	3	8	54	48	734080	39	202	118	44	0.818	40	0.688	160	1	5	1	17.5	11.5	0.326	1	64.388	9	86.5	NaN	NaN	23.15	22.064	20
445	2009	11	3	9	0	50	734080	53	274	156	56	0.696	62	0.653	102	1	9	1	31.5	14.5	0.415	0	58.44	9	94	NaN	NaN	23.15	21.633	19
446	2009	11	3	9	7	6	734080	48.5	276	172	48	0.885	56	0.625	184	1	13	1	28.5	13.5	0.374	1	59.293	25	93.5	NaN	NaN	23.15	21.733	5
447	2009	11	3	9	14	46	734080	46.5	240	116	62	0.726	62	0.54	606	1	15	3	22.5	13.5	0.137	1	59.644	15	85	NaN	NaN	23.15	21.59	12
448	2009	11	3	9	28	52	734080	49	204	92	64	0.766	48	0.979	62	1	13	1	21	4	0.346	1	58.553	9	94.5	NaN	NaN	23.15	19.58	16
449	2009	11	3	9	33	18	734080	56	270	150	36	1.514	84	0.506	14	1	13	1	25	13.5	0.528	0	59.895	25	90.3	NaN	NaN	23.15	19.101	18
450	2009	11	3	9	38	2	734080	50.5	82	24	34	1.353	24	2.083	76	1	1	1	5	4.5	0.152	1	56.596	3	88.5	NaN	NaN	23.15	19.731	13
451	2009	11	3	9	40	40	734080	45.5	126	62	30	1.35	34	1.132	64	1	7	1	53	23.5	0.326	1	63.438	13	90.8	NaN	NaN	23.15	20.894	15
452	2009	11	3	9	43	50	734080	42	208	144	24	1.438	40	0.825	46	1	17	1	37.5	11.5	0.567	1	66.808	35	91.3	NaN	NaN	23.15	21.762	18
453	2009	11	3	9	48	4	734080	60.5	216	76	34	1.309	106	0.406	42	1	3	9	35.5	17.5	0.295	0	58.59	11	91.3	NaN	NaN	23.15	19.492	18
454	2009	11	3	9	52	22	734080	44	228	166	28	1.411	34	0.912	62	1	15	1	58.5	19	0.572	0	62.372	39	89.8	NaN	NaN	23.15	20.903	17
455	2009	11	3	9	57	12	734080	43.5	232	148	36	1.153	48	0.677	32	1	17	1	43	12.5	0.561	1	61.82	39	91	NaN	NaN	23.15	20.411	13
456	2009	11	3	10	1	36	734080	42.5	128	6	24	1.625	98	0.434	86	1	1	9	3.5	3.5	0.028	1	61.625	1	81.8	NaN	NaN	23.15	19.925	16
457	2009	11	3	10	5	10	734080	98	304	4	234	0.419	66	1.447	138	17	1	1	2.5	2.5	0.009	0	44.5	1	84	NaN	NaN	23.15	15.117	13
458	2009	11	3	10	12	32	734080	54.5	152	72	36	1.486	44	1.148	114	1	5	3	15	6.5	0.271	0	55.041	13	76	NaN	NaN	23.15	19.257	12
459	2009	11	3	10	16	58	734080	142	272	2	164	0.866	106	1.335	132	13	1	1	0.5	0.5	0.005	0	40.375	1	93	NaN	NaN	23.15	14.65	12
460	2009	11	3	10	23	42	734080	116	194	4	100	1.135	90	1.267	88	5	1	1	4.5	2.5	0.014	0	43.833	1	85.5	NaN	NaN	23.15	15.033	15
461	2009	11	3	10	28	24	734080	162	364	2	248	0.653	114	1.421	244	19	1	1	0	0	0.003	0	36.375	1	87.8	NaN	NaN	23.15	14.5	13
462	2009	11	3	10	38	32	734080	229.5	426	8	234	0.979	184	1.247	162	17	1	1	0.5	0.5	0.014	0	38.2	1	76.3	NaN	NaN	23.15	13.17	17
463	2009	11	3	10	48	20	734080	52.5	202	94	42	1.155	66	0.72	58	1	7	1	18	6.5	0.362	0	55.141	11	92.8	NaN	NaN	23.1	18.85	4
464	2009	11	3	10	52	40	734080	50	116	54	40	1.138	22	1.818	12	1	3	1	15.5	10	0.422	1	56.045	9	82	NaN	NaN	23.1	19.48	2
465	2009	11	3	10	54	48	734080	7	20	0	14	0.5	6	1.167	94	1	1	1	0	0	0	0	69.25	1	68.8	NaN	NaN	23.15	23.15	NaN
466	2009	11	3	10	56	42	734080	213	290	2	126	1.69	162	1.315	120	3	1	3	0	0	0.005	0	37.875	1	91.5	NaN	NaN	23.1	13.75	1
467	2009	11	3	11	3	32	734080	236	352	30	130	1.788	192	1.227	122	3	3	1	5	3.5	0.063	0	38.781	1	96	NaN	NaN	23.1	13.106	15
468	2009	11	3	11	11	26	734080	235	284	2	114	2.057	168	1.399	146	3	1	1	0.5	0.5	0.005	1	41.375	1	109.3	NaN	NaN	23.1	13.15	15
469	2009	11	3	11	18	36	734080	86.5	224	62	56	1.384	106	0.778	104	1	7	1	18	9	0.189	0	85.273	17	113	NaN	NaN	23.1	15.677	13
470	2009	11	3	11	24	4	734080	52	180	52	76	0.618	52	0.894	142	1	3	1	14.5	5.5	0.161	0	115.333	19	120.8	NaN	NaN	23.1	18.339	9
471	2009	11	3	11	29	26	734080	191.5	294	18	150	1.277	126	1.508	66	1	3	1	11.5	6.5	0.05	0	69.7	3	127.3	NaN	NaN	23.1	14	9
472	2009	11	3	11	35	26	734080	177.5	250	20	130	1.365	100	1.55	120	5	1	1	22.5	22.5	0.054	1	81.159	5	162.5	NaN	NaN	23.05	14.268	2
473	2009	11	3	11	41	36	734080	243.5	488	178	198	0.982	112	1.647	152	7	21	1	183	72.5	0.278	0	78.383	39	168.8	NaN	NaN	23.05	13.575	12
474	2009	11	3	11	52	16	734080	245	424	130	116	2.095	178	1.376	134	1	15	1	15	3.5	0.233	1	72.383	31	NaN	NaN	4.1	23.1	12.869	1
475	2009	11	3	12	1	34	734081	244.5	368	102	106	2.283	160	1.528	208	1	7	1	6.5	2.5	0.177	1	76.692	31	NaN	NaN	3.7	23	12.95	13
476	2009	11	3	12	11	10	734081	245	400	120	112	2.165	168	1.455	408	1	11	3	10	3.5	0.149	1	85.209	39	NaN	NaN	-0.8	23.1	12.948	8
477	2009	11	3	12	24	38	734081	149	268	4	100	1.49	164	0.896	138	1	1	1	2	2	0.01	0	121.75	1	183	NaN	NaN	23.05	14.45	12
478	2009	11	3	12	31	24	734081	252.5	424	102	132	1.898	190	1.326	124	1	5	1	4.5	2	0.186	0	90.529	29	NaN	NaN	-3.7	23.05	12.815	8
479	2009	11	3	12	40	32	734081	251.5	392	108	120	2.092	164	1.527	740	1	13	1	10.5	1.5	0.095	1	89.655	33	NaN	NaN	0.3	23.05	12.893	11
480	2009	11	3	12	59	24	734081	241.5	448	154	126	1.905	168	1.438	148	1	29	3	23.5	2.5	0.258	1	97.936	41	NaN	NaN	2.2	23.1	13.104	10
481	2009	11	3	13	9	20	734081	239.5	414	130	106	2.245	178	1.34	230	1	17	5	15.5	2.5	0.202	1	94.848	43	NaN	NaN	0.6	23.1	13.16	1
482	2009	11	3	13	20	4	734081	235.5	400	138	102	2.255	160	1.462	290	1	15	1	60.5	10	0.2	1	100.925	37	NaN	NaN	3.7	23.15	13.318	5
483	2009	11	3	13	31	34	734081	38	78	4	28	1.357	46	0.826	116	1	1	1	0	0	0.021	0	176.5	1	208.3	NaN	NaN	23.15	20.1	2
484	2009	11	3	13	34	48	734081	237.5	420	134	112	2.116	174	1.359	274	1	13	1	12.5	2	0.193	0	93.949	43	NaN	NaN	3.2	23.15	13.19	6
485	2009	11	3	13	46	22	734081	237	456	182	110	2.15	164	1.439	574	1	23	1	62.5	11	0.177	1	93.462	53	NaN	NaN	4	23.1	13.277	2
486	2009	11	3	14	3	32	734081	239	398	130	112	2.121	156	1.529	630	1	21	1	20	3	0.126	1	105.413	39	NaN	NaN	-8.9	23.1	13.246	8
487	2009	11	3	14	20	40	734081	237	396	112	110	2.145	174	1.356	2428	1	11	1	7	1.5	0.04	1	103.127	37	NaN	NaN	1.8	23.15	13.3	0
488	2009	11	3	15	7	44	734081	5	18	4	8	0.625	6	0.75	13412	1	1	1	0.5	0.5	0	0	215.583	1	224.3	NaN	NaN	23.15	23.1	NaN
489	2009	11	3	18	51	34	734081	231	364	72	132	1.735	160	1.441	4956	1	5	1	4.5	2	0.014	0	121.75	21	NaN	NaN	1.3	23.7	13.55	1
490	2009	11	3	20	20	14	734081	9	62	4	30	0.3	28	0.304	3394	1	1	1	0.5	0.5	0.001	0	217	1	227	NaN	NaN	23.8	23.3	5
491	2009	11	3	21	17	50	734081	77.5	208	14	110	0.705	84	0.839	746	1	1	1	7	7	0.015	0	162.781	3	136.2	0.1	6.8	23.8	16.906	5
492	2009	11	3	21	33	44	734081	88.5	230	4	120	0.733	106	0.825	340	1	1	1	1.5	1	0.007	0	151.333	1	216	NaN	NaN	23.7	15.55	1
493	2009	11	3	21	43	14	734081	214	416	114	132	1.595	170	1.259	178	1	15	1	47.5	15	0.192	0	101.927	31	NaN	NaN	-0.5	23.7	13.947	1
494	2009	11	3	21	53	8	734081	8	70	20	32	0.219	18	0.333	634	1	3	1	4	2	0.028	0	202.591	7	210.5	NaN	NaN	23.7	23.527	2
495	2009	11	3	22	4	52	734081	5.5	66	24	22	0.25	20	0.2	36	1	3	3	2.5	1.5	0.235	0	204.846	7	213.8	NaN	NaN	23.8	23.715	NaN
496	2009	11	3	22	6	34	734081	5.5	64	26	16	0.25	22	0.182	200	1	3	1	4	2	0.098	1	204.571	5	204	NaN	NaN	23.8	23.743	NaN
497	2009	11	3	22	10	58	734081	215	468	74	168	1.274	226	0.852	224	5	5	3	27.5	23.5	0.107	0	101.303	23	NaN	NaN	0	23.9	13.979	2
498	2009	11	3	22	22	30	734081	214.5	398	108	122	1.746	168	1.274	570	1	9	1	7	1.5	0.112	1	102.077	35	NaN	NaN	-0.2	23.8	13.967	1
499	2009	11	3	22	38	38	734081	213	512	98	132	1.61	282	0.754	54	1	9	21	6	1.5	0.173	1	99.08	25	NaN	NaN	1.9	23.75	14.05	2
500	2009	11	3	22	48	4	734081	208	358	92	106	1.953	160	1.272	108	1	9	1	9.5	4.5	0.197	1	102.569	21	NaN	NaN	-1.3	23.65	14.1	1
501	2009	11	3	22	55	50	734081	207.5	400	150	106	1.929	144	1.441	430	1	11	1	8	3	0.181	1	95.543	41	NaN	NaN	-3.4	23.7	14.1	0
502	2009	11	3	23	9	40	734081	212	416	134	126	1.671	156	1.359	322	1	15	1	11	1.5	0.182	1	89.739	35	NaN	NaN	-2.4	23.75	14.1	1
503	2009	11	3	23	21	58	734081	215	454	134	134	1.578	186	1.156	120	1	5	3	10.5	4.5	0.233	1	86.57	37	NaN	NaN	-4.9	23.7	14.08	1
504	2009	11	3	23	31	32	734081	6.5	66	28	22	0.25	16	0.344	186	1	5	1	4	1.5	0.111	0	177.867	5	185	NaN	NaN	23.7	23.573	NaN
505	2009	11	3	23	35	44	734081	5	60	20	24	0.188	16	0.25	278	1	1	1	1.5	1	0.059	0	176.273	7	178.8	NaN	NaN	23.7	23.641	NaN
506	2009	11	3	23	41	22	734081	219.5	450	154	116	1.875	180	1.214	168	1	7	3	6	2	0.249	0	69.965	31	166.3	NaN	NaN	23.7	14.001	3
507	2009	11	3	23	51	40	734081	217	428	118	146	1.483	164	1.32	266	1	11	3	7	1.5	0.17	1	56.429	15	146.5	NaN	NaN	23.7	14.05	1
508	2009	11	4	0	3	14	734081	82	222	74	76	0.98	72	0.84	218	1	3	1	30	21.5	0.168	0	87.572	25	143	NaN	NaN	23.65	16.393	6
509	2009	11	4	0	10	34	734081	42	182	38	126	0.266	18	2.333	118	9	9	1	19.5	9.5	0.127	0	86.388	11	124.8	NaN	NaN	23.65	21.54	1
510	2009	11	4	0	15	34	734081	44	138	60	30	1.367	48	0.719	116	1	5	7	43.5	11.5	0.236	1	77.774	21	117.5	NaN	NaN	23.65	20.013	1
511	2009	11	4	0	19	48	734081	55.5	168	60	38	1.237	70	0.636	92	1	5	3	21.5	11.5	0.231	0	68.226	9	109.8	NaN	NaN	23.65	18.458	4
512	2009	11	4	0	24	8	734081	168.5	322	92	92	1.375	138	1.221	252	1	11	1	77	42	0.16	0	38.234	5	91.8	NaN	NaN	23.6	14.455	0
513	2009	11	4	0	33	42	734081	19.5	82	38	24	0.813	20	0.9	48	1	5	1	10.5	4.5	0.292	0	62.4	9	86.3	NaN	NaN	23.6	22.442	6
514	2009	11	4	0	35	52	734081	14.5	128	94	16	0.906	18	0.639	38	1	5	1	19	10	0.566	0	59.906	17	81.5	NaN	NaN	23.6	23.027	1
515	2009	11	4	0	38	38	734081	16	106	56	20	0.7	30	0.533	48	1	5	1	10	4.5	0.364	0	51.948	9	74.5	NaN	NaN	23.6	23.066	8
516	2009	11	4	0	41	12	734081	63.5	152	2	84	0.756	66	0.962	80	7	1	1	0	0	0.009	0	44.25	1	75.3	NaN	NaN	23.6	18.15	11
517	2009	11	4	0	45	4	734081	16.5	130	76	30	0.4	24	0.646	54	1	7	1	26.5	7.5	0.413	0	50.045	9	74.3	NaN	NaN	23.55	23.053	6
518	2009	11	4	0	48	8	734081	8	60	28	12	0.667	20	0.3	24	1	3	1	4	2.5	0.333	0	55.517	7	71.3	NaN	NaN	23.55	23.55	NaN
519	2009	11	4	0	49	32	734081	12.5	116	82	18	0.528	16	0.594	48	1	11	1	14	4	0.5	0	53.256	15	67.5	NaN	NaN	23.6	23.327	9
520	2009	11	4	0	52	16	734081	18.5	148	10	44	0.42	94	0.144	56	3	1	5	5	5	0.049	0	50.5	1	68	NaN	NaN	23.6	22.733	1
521	2009	11	4	0	55	40	734081	11.5	66	38	10	0.85	18	0.556	40	1	1	1	4.5	3	0.358	0	55.975	7	65.8	NaN	NaN	23.6	23.283	2
522	2009	11	4	0	57	26	734081	15.5	110	74	14	0.929	22	0.614	86	1	9	1	20.5	7	0.378	0	56.362	13	66.8	NaN	NaN	23.65	23.201	1
523	2009	11	4	1	0	42	734081	89	126	20	52	1.298	54	1.639	126	1	3	1	26	23.5	0.079	0	41.5	1	64	NaN	NaN	23.65	16.423	1
524	2009	11	4	1	4	54	734081	14	94	58	20	0.5	16	0.875	56	1	5	1	11	4.5	0.387	0	59.533	13	71	NaN	NaN	23.6	23.132	3
525	2009	11	4	1	7	24	734081	19	46	16	22	0.682	8	2.375	70	1	3	1	6	5	0.138	0	57.111	1	70.3	NaN	NaN	23.6	22.95	0
526	2009	11	4	1	9	20	734081	39	68	4	48	0.74	16	2.313	102	3	1	1	5.5	3.5	0.024	0	50.167	1	76.5	NaN	NaN	23.65	20.733	0
527	2009	11	4	1	12	10	734081	19	140	98	24	0.563	18	1.056	60	1	9	1	32.5	8.5	0.49	0	59.655	23	79.8	NaN	NaN	23.6	22.875	4
528	2009	11	4	1	15	30	734081	20	128	78	18	0.944	32	0.453	34	1	7	1	15.5	5.5	0.481	1	57.85	15	82	NaN	NaN	23.55	22.47	3
529	2009	11	4	1	18	12	734081	23.5	130	56	46	0.38	28	0.839	46	3	3	1	15	10	0.318	0	58.448	13	79.5	NaN	NaN	23.55	22.448	3
530	2009	11	4	1	21	8	734081	18	154	116	20	0.8	18	0.75	44	1	17	1	18.5	5	0.586	0	62.898	25	80.5	NaN	NaN	23.55	22.536	2
531	2009	11	4	1	24	26	734081	25	122	90	22	0.795	10	2.5	14	1	7	1	20.5	9.5	0.662	0	61.864	19	82	NaN	NaN	23.55	22.508	2
532	2009	11	4	1	26	42	734081	155.5	234	4	64	2.398	166	0.931	74	1	1	1	3	2	0.013	0	40.667	1	76.5	NaN	NaN	23.55	14.65	3
533	2009	11	4	1	31	50	734081	22	146	96	26	0.788	24	0.917	52	1	9	1	14.5	4	0.485	0	61.321	21	82.3	NaN	NaN	23.55	22.403	6
534	2009	11	4	1	35	8	734081	77.5	196	4	126	0.595	66	1.121	64	7	1	1	6	3.5	0.015	0	45.083	1	83.8	NaN	NaN	23.55	15.633	5
535	2009	11	4	1	39	28	734081	23	174	120	22	0.955	32	0.703	38	1	3	1	5.5	2	0.566	0	64.045	35	86	NaN	NaN	23.55	22.175	3
536	2009	11	4	1	43	0	734081	37.5	188	112	44	0.739	32	0.953	54	1	11	1	20	7	0.463	0	57.706	21	93.5	NaN	NaN	23.55	20.544	3
537	2009	11	4	1	47	2	734081	34	188	128	24	1.167	36	0.861	66	1	11	1	17	7	0.504	1	60.523	27	94.8	NaN	NaN	23.5	20.706	5
538	2009	11	4	1	51	16	734081	43.5	186	96	34	0.956	56	0.571	1300	1	1	1	22.5	11.5	0.065	0	58.694	9	94.3	NaN	NaN	23.5	20.014	5
539	2009	11	4	2	16	2	734081	44.5	208	118	30	1.183	60	0.542	76	1	9	1	34	12	0.415	1	56.888	9	85.8	NaN	NaN	23.55	18.837	6
540	2009	11	4	2	20	46	734081	54	252	110	74	0.73	68	0.559	1556	1	5	1	27	20.5	0.061	0	60.75	9	95	NaN	NaN	23.5	18.871	3
541	2009	11	4	2	50	54	734081	228	416	54	174	1.04	188	1.213	416	13	5	1	50	47.5	0.065	0	37.205	1	87.3	NaN	NaN	23.5	13.511	6
542	2009	11	4	3	4	46	734081	128	236	32	88	1.131	116	1.103	150	3	1	1	28.5	28.5	0.083	0	41.044	1	86.5	NaN	NaN	23.5	14.735	6
543	2009	11	4	3	11	12	734081	172.5	352	4	186	0.909	162	1.056	138	11	1	7	5	3.5	0.008	0	39.167	1	94.8	NaN	NaN	23.5	14.45	2
544	2009	11	4	3	19	22	734081	162	350	2	202	0.802	146	1.11	188	9	1	5	0	0	0.004	1	36.5	1	90.3	NaN	NaN	23.5	14.525	4
545	2009	11	4	3	28	20	734081	160.5	394	4	232	0.688	158	1.003	184	9	1	3	3	2	0.007	1	37.667	1	96.5	NaN	NaN	23.5	14.5	1
546	2009	11	4	3	37	58	734081	140	330	44	130	0.942	156	0.897	134	3	3	3	21.5	17.5	0.095	0	37.772	1	76.5	NaN	NaN	23.5	14.646	0
547	2009	11	4	3	45	42	734081	225	446	42	208	0.892	196	1.143	218	7	3	9	41.5	40	0.063	0	35.989	3	95.5	NaN	NaN	23.45	13.6	4
548	2009	11	4	3	56	46	734081	48.5	202	72	48	0.729	82	0.591	4	1	3	1	23.5	17	0.35	0	64.122	11	95	NaN	NaN	23.45	17.946	2
549	2009	11	4	4	0	12	734081	111	388	94	182	0.555	112	0.942	202	3	7	3	23.5	10	0.159	0	39.318	1	99	NaN	NaN	23.45	14.8	2
550	2009	11	4	4	10	2	734081	197.5	330	4	152	1.27	174	1.132	176	5	1	5	5	4.5	0.008	0	37.083	1	92	NaN	NaN	23.45	13.95	1
551	2009	11	4	4	18	28	734081	148.5	310	82	82	1.39	146	1.01	190	1	9	5	47.5	34.5	0.164	0	37.786	1	83.5	NaN	NaN	23.45	14.739	1
552	2009	11	4	4	26	48	734081	44.5	204	112	34	1.044	58	0.707	88	1	3	1	39.5	14	0.384	0	63.768	19	89.3	NaN	NaN	23.4	17.436	3
553	2009	11	4	4	31	40	734081	88	350	28	78	0.904	244	0.361	1432	1	3	7	19.5	17.5	0.016	0	51.6	1	88.3	NaN	NaN	23.45	15.13	2
554	2009	11	4	5	1	22	734081	137.5	382	4	172	0.782	206	0.665	70	11	1	1	3.5	3	0.009	0	42.917	1	81.8	NaN	NaN	23.4	14.817	7
555	2009	11	4	5	8	54	734081	131	310	18	200	0.505	92	1.424	190	9	3	1	35	32.5	0.036	1	42.775	1	104.3	NaN	NaN	23.4	14.975	3
556	2009	11	4	5	17	14	734081	213.5	364	44	176	1.213	144	1.455	248	7	7	1	17	8	0.072	0	38.207	1	91	NaN	NaN	23.4	13.548	5
557	2009	11	4	5	27	26	734081	211.5	280	32	88	1.926	160	1.322	196	3	3	1	43	42.5	0.067	1	39.368	1	81.3	NaN	NaN	23.4	14.153	5
558	2009	11	4	5	35	22	734081	81.5	224	94	100	0.64	30	2.033	26	1	5	3	62	28.5	0.376	0	53.781	13	103.3	NaN	NaN	23.35	15.736	7
559	2009	11	4	5	39	32	734081	77.5	120	4	58	1.319	58	1.31	150	1	1	1	2.5	1.5	0.015	1	48.583	1	76.3	NaN	NaN	23.35	15.3	7
560	2009	11	4	5	44	2	734081	73.5	186	44	88	0.71	54	1.269	134	1	3	5	26	11	0.138	1	53.054	7	86.3	NaN	NaN	23.4	15.454	5
561	2009	11	4	5	49	22	734081	92.5	212	82	90	0.789	40	1.775	8	3	5	3	48	21.5	0.373	0	48.69	7	93.5	NaN	NaN	23.4	15.276	3
562	2009	11	4	5	53	2	734081	7.5	28	12	8	0.75	8	0.938	150	1	3	1	10.5	6	0.067	0	82.964	3	96.8	NaN	NaN	23.35	23.4	NaN
563	2009	11	4	5	56	0	734081	62.5	208	90	54	1.065	64	0.969	110	1	9	3	36.5	11	0.283	0	59.924	11	99.3	NaN	NaN	23.4	16.626	4
564	2009	11	4	6	1	18	734081	86	232	146	50	1.38	36	1.736	164	1	9	3	111.5	49	0.369	0	54.27	21	102.3	NaN	NaN	23.4	16.236	1
565	2009	11	4	6	7	54	734081	179	322	4	196	0.875	122	1.459	246	11	1	1	8.5	7.5	0.007	0	39.333	1	96.3	NaN	NaN	23.4	14.4	5
566	2009	11	4	6	17	22	734081	117.5	242	50	100	1.175	92	1.163	170	1	7	1	32.5	10.5	0.121	0	44.154	5	91.8	NaN	NaN	23.4	15.042	8
567	2009	11	4	6	24	14	734081	111	240	64	74	1.493	102	0.858	168	1	5	5	45	23.5	0.157	1	44.455	7	91.8	NaN	NaN	23.4	15.1	8
568	2009	11	4	6	31	2	734081	132	334	102	112	0.862	120	1.1	2482	1	7	1	65.5	46	0.036	0	46.24	13	100.5	NaN	NaN	23.4	15.027	8
569	2009	11	4	7	17	58	734081	170	268	2	134	1.269	132	1.288	172	3	1	1	0	0	0.005	0	41.125	1	87.8	NaN	NaN	23.4	14.075	0
570	2009	11	4	7	25	18	734081	205	382	4	238	0.853	140	1.45	272	5	1	1	4	2	0.006	0	38.333	1	99.8	NaN	NaN	23.35	13.9	7
571	2009	11	4	7	36	12	734081	55.5	254	146	42	0.976	66	0.689	114	1	7	1	43.5	14.5	0.397	0	68.159	23	95.5	NaN	NaN	23.4	17.6	2
572	2009	11	4	7	42	20	734081	212.5	356	2	204	1.042	150	1.413	266	5	1	1	0.5	0.5	0.003	0	38.625	1	90.8	NaN	NaN	23.4	13.45	8
573	2009	11	4	7	52	42	734081	53.5	264	156	60	0.892	48	0.781	126	1	11	7	49	23.5	0.4	0	68.019	25	83	NaN	NaN	23.4	18.799	7
574	2009	11	4	7	59	12	734081	97	298	4	216	0.444	78	1.231	164	17	1	1	2	1	0.009	0	44.25	1	99	NaN	NaN	23.4	15.1	6
575	2009	11	4	8	6	54	734081	51	248	84	98	0.367	66	0.561	104	5	5	1	34	16	0.239	0	66.337	11	80.8	NaN	NaN	23.4	18.027	6
576	2009	11	4	8	12	46	734081	175	366	2	244	0.717	120	1.458	852	11	1	1	0	0	0.002	0	37	1	93	NaN	NaN	23.4	14.25	6
577	2009	11	4	8	33	4	734081	67.5	222	8	80	0.819	134	0.504	486	1	1	3	2	2	0.011	0	52.6	1	98	NaN	NaN	23.4	15.47	7
578	2009	11	4	8	44	52	734081	35.5	224	140	36	0.903	48	0.521	1428	1	7	1	19.5	10.5	0.085	0	73.384	29	87	NaN	NaN	23.35	19.592	9
579	2009	11	4	9	12	24	734081	42.5	212	76	44	0.693	92	0.326	86	1	3	1	25.5	12.5	0.255	0	68.878	17	93.5	NaN	NaN	23.35	18.474	7
580	2009	11	4	9	17	22	734081	43.5	250	132	44	0.773	74	0.446	212	1	3	1	35	10.5	0.286	1	67.802	23	97.3	NaN	NaN	23.35	17.502	4
581	2009	11	4	9	25	4	734081	41.5	218	140	42	0.786	36	0.931	154	1	19	3	55.5	12.5	0.376	1	61.412	33	89.5	NaN	NaN	23.35	17.945	3
582	2009	11	4	9	31	16	734081	49	226	82	54	0.648	90	0.544	90	1	5	1	19	16	0.259	0	66.667	17	92.5	NaN	NaN	23.35	17.205	0
583	2009	11	4	9	36	32	734081	37.5	250	166	32	0.938	52	0.548	54	1	11	1	35.5	9	0.546	0	67.908	35	92.8	NaN	NaN	23.35	18.278	5
584	2009	11	4	9	41	36	734081	41.5	270	170	36	0.875	64	0.477	82	1	9	1	33	11	0.483	0	67.096	33	91	NaN	NaN	23.3	18.172	4
585	2009	11	4	9	47	28	734081	180.5	294	4	156	1.144	134	1.328	170	5	1	1	4.5	2.5	0.009	0	38.5	1	94.3	NaN	NaN	23.25	14.35	5
586	2009	11	4	9	55	12	734081	35.5	228	146	38	0.829	44	0.636	48	1	11	1	16.5	7.5	0.529	0	68.122	33	93	NaN	NaN	23.25	18.32	3
587	2009	11	4	9	59	48	734081	195.5	288	12	104	1.683	172	1.137	134	3	1	3	20.5	20.5	0.028	0	41.107	1	88.5	NaN	NaN	23.25	14.257	4
588	2009	11	4	10	6	50	734081	39.5	194	126	32	0.891	36	0.778	8	1	11	5	51.5	11.5	0.624	0	62.41	27	90.5	NaN	NaN	23.2	18.652	5
589	2009	11	4	10	10	12	734081	5.5	12	0	4	1.375	8	0.688	158	1	1	1	0	0	0	0	84	1	91.3	NaN	NaN	23.2	23.15	2
590	2009	11	4	10	13	2	734081	37	176	100	34	0.809	42	0.643	46	1	7	1	24.5	10	0.45	0	67.157	15	94	NaN	NaN	23.2	18.909	6
591	2009	11	4	10	16	44	734081	220	368	18	202	1.045	148	1.486	348	7	1	1	9	9	0.025	0	35.075	1	88	NaN	NaN	23.15	13.84	3
592	2009	11	4	10	28	40	734081	33.5	196	114	30	0.867	52	0.558	104	1	3	1	14	7.5	0.38	0	68.552	27	83.3	NaN	NaN	23.15	19.034	3
593	2009	11	4	10	33	40	734081	31.5	236	162	32	0.859	42	0.631	86	1	13	1	17	5	0.503	1	69.5	45	85.8	NaN	NaN	23.1	19.053	1
594	2009	11	4	10	39	2	734081	32	260	190	28	0.946	42	0.56	168	1	11	1	21	8.5	0.444	1	68.977	53	93.3	NaN	NaN	23	19.261	0
595	2009	11	4	10	46	10	734081	53.5	218	50	92	0.582	76	0.507	100	1	1	1	15	15	0.157	0	59.212	3	89.8	NaN	NaN	23.05	17.45	3
596	2009	11	4	10	51	28	734081	38	196	116	36	0.806	44	0.659	88	1	3	1	20	9	0.408	0	66.653	23	87.3	NaN	NaN	23	19.156	4
597	2009	11	4	10	56	12	734081	66.5	244	14	192	0.346	38	1.605	6	7	1	1	5.5	5.5	0.056	0	50.875	3	94.5	NaN	NaN	23	16.788	1
598	2009	11	4	11	0	22	734081	116	166	26	58	1.466	82	1.409	222	1	3	1	32.5	31.5	0.067	0	45.964	1	97.5	NaN	NaN	22.95	15.004	1
599	2009	11	4	11	6	50	734081	35.5	220	140	42	0.798	38	0.75	74	1	7	1	12	7	0.476	0	83.873	43	102.3	NaN	NaN	23	17.687	8
600	2009	11	4	11	11	44	734081	68	246	110	58	0.922	78	0.641	212	1	9	1	42.5	18	0.24	0	80.906	19	114	NaN	NaN	22.95	16.312	5
601	2009	11	4	11	19	22	734081	230	458	88	156	1.321	214	1.075	514	1	3	5	25	24.5	0.091	0	42.572	1	128.8	NaN	NaN	22.95	13.692	13
602	2009	11	4	11	35	34	734081	226.5	450	134	140	1.618	176	1.287	124	1	9	1	8	2.5	0.233	1	63.941	21	151	NaN	NaN	22.95	14.193	5
603	2009	11	4	11	45	8	734081	226	508	162	126	1.782	220	1.023	1438	3	9	3	7.5	2	0.083	1	72.345	23	153	NaN	NaN	23	14.2	4
604	2009	11	4	12	17	34	734082	231	454	114	144	1.59	196	1.179	408	1	7	1	4.5	1.5	0.132	1	90.272	29	NaN	NaN	-5	22.95	13.316	4
605	2009	11	4	12	31	56	734082	228.5	522	254	118	1.919	150	1.517	2930	1	27	1	22	2	0.074	1	93.441	65	NaN	NaN	-1	22.95	13.251	8
606	2009	11	4	13	29	28	734082	234	490	170	140	1.657	180	1.297	3024	1	11	1	10	2.5	0.048	1	101.884	45	NaN	NaN	4.1	22.95	13.3	5
607	2009	11	4	14	28	2	734082	243.5	474	170	134	1.791	170	1.432	376	1	19	1	19.5	3.5	0.2	1	109.549	49	NaN	NaN	-5.7	23.05	13.284	4
608	2009	11	4	14	42	12	734082	245.5	514	226	130	1.877	158	1.551	168	3	19	1	18.5	3	0.331	1	110.079	63	NaN	NaN	-9.9	23.15	13.246	0
609	2009	11	4	14	53	34	734082	245.5	464	182	124	1.972	158	1.554	160	1	15	1	10	1.5	0.292	1	107.938	57	NaN	NaN	-1	23.15	13.25	0
610	2009	11	4	15	3	58	734082	246	426	138	122	1.984	166	1.476	238	1	17	1	16	4	0.208	1	103.457	45	181.2	0.8	6.1	23.15	13.251	1
611	2009	11	4	15	15	2	734082	247	386	104	118	2.081	164	1.506	250	1	11	1	8.5	2	0.164	1	107.071	35	NaN	NaN	-0.1	23.15	13.3	0
612	2009	11	4	15	25	38	734082	250	396	110	118	2.089	168	1.485	190	1	3	3	5	3.5	0.188	1	108.027	29	NaN	NaN	5.3	23.1	13.222	3
613	2009	11	4	15	35	24	734082	252.5	430	134	124	2.016	172	1.468	778	1	13	3	10.5	3	0.111	1	108.368	43	NaN	NaN	-1	23.15	13	1
614	2009	11	4	15	55	32	734082	255	432	126	132	1.917	174	1.463	250	1	11	1	8.5	2	0.185	1	106.113	35	NaN	NaN	-9.6	23.15	12.6	1
615	2009	11	4	16	6	54	734082	256	422	122	130	1.958	170	1.503	272	1	9	3	7	2	0.176	1	103.685	39	NaN	NaN	-4.9	23.15	12.501	2
616	2009	11	4	16	18	28	734082	256.5	358	50	124	2.056	184	1.394	212	1	7	1	6.5	2.5	0.088	1	99.385	17	NaN	NaN	1.6	23.05	12.45	0
617	2009	11	4	16	27	58	734082	260	484	182	132	1.958	170	1.529	310	1	15	3	11.5	2	0.229	1	104.28	51	NaN	NaN	-0.4	23.05	12.429	2
618	2009	11	4	16	41	12	734082	263	488	182	136	1.923	170	1.541	312	1	15	1	12.5	2	0.228	1	106.853	47	NaN	NaN	2	23.15	12.4	1
619	2009	11	4	16	54	32	734082	259.5	448	110	144	1.795	194	1.338	1384	1	11	1	8	1.5	0.06	1	103.5	29	NaN	NaN	1.9	23.15	12.4	3
620	2009	11	4	17	25	4	734082	241	476	206	118	2.025	152	1.582	464	1	13	1	9.5	2	0.219	1	110.029	61	NaN	NaN	-0.5	23.2	12.85	0
621	2009	11	4	17	40	44	734082	242	440	134	130	1.842	176	1.372	432	1	7	1	7	2.5	0.154	1	109.184	37	NaN	NaN	0.4	23.15	12.807	4
622	2009	11	4	17	55	16	734082	244.5	478	154	136	1.787	188	1.298	280	1	15	1	12	2	0.203	1	109.372	37	NaN	NaN	-0.6	23.2	12.691	0
623	2009	11	4	18	7	54	734082	247.5	504	186	136	1.805	182	1.357	266	1	11	1	9.5	2	0.242	1	108.207	55	NaN	NaN	0	23.25	12.729	0
624	2009	11	4	18	20	44	734082	255	424	118	136	1.824	170	1.5	158	1	9	1	14	9	0.203	1	103.533	37	NaN	NaN	-3.6	23.3	12.833	0
625	2009	11	4	18	30	26	734082	271.5	456	162	128	2.02	166	1.617	146	1	5	1	24	13	0.269	1	98.088	41	NaN	NaN	-1.1	23.3	12.923	0
626	2009	11	4	18	40	28	734082	280.5	444	146	122	2.201	176	1.594	148	1	11	1	40	13	0.247	1	93.791	47	NaN	NaN	2	23.35	12.824	0
627	2009	11	4	18	50	20	734082	264.5	424	146	120	2.188	158	1.62	166	1	13	1	20.5	8.5	0.247	1	99.24	41	NaN	NaN	0.8	23.35	12.74	0
628	2009	11	4	19	0	10	734082	264	442	138	120	2.129	184	1.41	168	1	7	1	21	9	0.226	1	98.489	43	NaN	NaN	1.5	23.35	12.709	1
629	2009	11	4	19	10	20	734082	266.5	406	120	124	2.085	162	1.639	156	3	5	1	16	8	0.214	1	98.057	47	NaN	NaN	0.7	23.3	12.784	3
630	2009	11	4	19	19	42	734082	299.5	438	114	124	2.137	200	1.488	194	1	9	1	44.5	35.5	0.18	0	96.328	33	NaN	NaN	-0.7	23.25	12.834	0
631	2009	11	4	19	30	14	734082	309.5	494	174	136	1.941	184	1.679	148	1	5	1	49	45.5	0.271	1	87.614	47	NaN	NaN	2	23.3	12.862	2
632	2009	11	4	19	40	56	734082	263.5	566	230	126	2.048	210	1.221	204	1	21	7	31.5	9.5	0.299	0	100.291	75	NaN	NaN	3.1	23.25	12.7	1
633	2009	11	4	19	53	46	734082	254.5	450	146	118	2.144	186	1.358	198	1	21	3	20.5	2	0.225	1	101.449	45	NaN	NaN	0.6	23.2	12.683	1
634	2009	11	4	20	4	34	734082	252.5	382	76	120	2.083	186	1.358	134	1	7	7	6.5	3	0.147	1	103.385	31	NaN	NaN	3.3	23.25	12.682	0
635	2009	11	4	20	13	10	734082	258	462	146	112	2.246	204	1.223	148	1	9	5	20	9	0.239	1	101.851	39	NaN	NaN	2	23.4	12.662	2
636	2009	11	4	20	23	20	734082	250	352	90	112	2.205	150	1.663	152	1	5	1	12.5	4.5	0.179	1	103.266	29	NaN	NaN	3.4	23.35	12.653	0
637	2009	11	4	20	31	44	734082	284	522	194	114	2.215	214	1.32	188	1	5	7	35	31.5	0.273	0	95.028	51	NaN	NaN	5.1	23.25	12.563	0
638	2009	11	4	20	43	34	734082	284	452	146	128	2.199	178	1.593	188	1	5	1	13	5	0.228	1	89.855	45	NaN	NaN	3.2	23.45	12.57	3
639	2009	11	4	20	54	14	734082	309.5	536	178	134	2.306	224	1.263	180	1	7	5	38	26.5	0.249	1	83.428	55	NaN	NaN	3	23.45	12.559	0
641	2009	11	4	21	18	4	734082	277.5	518	166	128	2.105	224	1.239	184	1	15	13	16.5	7.5	0.236	1	90.699	45	NaN	NaN	5	23.55	12.535	1
642	2009	11	4	21	29	46	734082	278.5	454	166	126	2.171	162	1.654	204	1	9	1	20.5	10.5	0.252	1	88.563	41	180.4	0.879	7.2	23.55	12.548	0
643	2009	11	4	21	40	44	734082	263	484	214	116	2.246	154	1.688	248	1	13	1	13.5	3	0.292	1	91.623	61	173.6	0.777	9.4	23.55	12.507	0
644	2009	11	4	21	52	56	734082	259	456	174	116	2.198	166	1.557	348	1	11	1	9.5	4	0.216	1	92.392	45	172	0.571	7	23.5	12.53	2
645	2009	11	4	22	6	20	734082	253.5	454	166	120	2.104	168	1.506	700	1	7	3	5.5	2	0.144	1	92.238	49	NaN	NaN	0.3	23.5	12.55	3
646	2009	11	4	22	25	34	734082	248	408	130	118	2.093	160	1.55	1446	1	11	1	6	1	0.07	1	91.712	29	NaN	NaN	-1.9	23.55	12.6	0
647	2009	11	4	22	56	28	734082	15.5	92	36	24	0.604	32	0.406	1118	1	1	1	3.5	2.5	0.03	0	186.658	11	195.2	-1.494	6.4	23.45	21.713	0
648	2009	11	4	23	16	38	734082	20.5	108	32	40	0.463	36	0.444	160	1	1	1	6.5	4.5	0.119	0	178.294	9	NaN	NaN	3.6	23.55	21.941	3
649	2009	11	4	23	21	6	734082	48.5	166	42	54	0.704	70	0.643	1302	1	1	1	14	10.5	0.029	0	158.705	11	NaN	NaN	3	23.5	19.093	5
650	2009	11	4	23	45	34	734082	113	284	106	108	0.977	70	1.186	124	1	5	1	39.5	30	0.26	0	114.468	25	NaN	NaN	-0.8	23.5	15.422	2
651	2009	11	4	23	52	22	734082	220	484	206	130	1.546	148	1.486	284	1	9	3	231	101.5	0.268	0	69.697	33	174.8	NaN	NaN	23.45	14.275	1
652	2009	11	5	0	5	10	734082	90.5	218	70	66	1.371	82	0.774	234	1	3	1	78	50	0.155	0	93.785	19	128.8	NaN	NaN	23.4	17.91	4
653	2009	11	5	0	12	42	734082	31.5	118	40	42	0.75	36	0.653	904	1	3	1	14	11	0.039	0	101.214	11	132.5	NaN	NaN	23.5	22.557	4
654	2009	11	5	0	29	44	734082	31.5	170	106	28	0.875	36	0.681	72	1	11	1	25	9	0.438	1	63.764	23	80.3	NaN	NaN	23.45	22.138	2
655	2009	11	5	0	33	46	734082	32.5	192	118	26	1.019	48	0.552	110	1	5	1	14	6	0.391	1	55.75	15	79.5	NaN	NaN	23.5	22.058	1
656	2009	11	5	0	38	48	734082	25	154	72	36	0.597	46	0.391	78	1	5	1	12.5	7	0.31	0	52.622	7	82	NaN	NaN	23.45	22.068	5
657	2009	11	5	0	42	40	734082	28	156	76	42	0.5	38	0.539	510	1	5	1	17.5	7.5	0.114	0	45.218	5	73.5	NaN	NaN	23.4	21.847	4
658	2009	11	5	0	53	46	734082	11.5	92	42	20	0.525	30	0.283	324	1	3	1	5	3	0.101	0	46.591	3	64.8	NaN	NaN	23.3	23.057	6
659	2009	11	5	1	0	42	734082	30.5	58	4	16	1.813	38	0.763	58	1	1	1	3	1.5	0.034	0	44.5	1	52.3	NaN	NaN	23.25	22.467	3
660	2009	11	5	1	2	38	734082	19.5	78	34	28	0.696	16	1.063	66	1	5	1	4.5	3	0.236	0	43.292	3	65.8	NaN	NaN	23.2	22.647	6
661	2009	11	5	1	5	2	734082	30.5	152	4	38	0.789	110	0.259	44	1	1	5	2.5	2	0.02	0	41.5	1	65.5	NaN	NaN	23.2	22.6	7
662	2009	11	5	1	8	18	734082	17.5	142	104	18	0.806	20	0.675	52	1	9	1	16	4	0.536	0	42.995	7	64.8	NaN	NaN	23.2	22.842	4
663	2009	11	5	1	11	32	734082	30	72	4	56	0.464	12	2.292	14	3	1	1	6.5	4	0.047	0	41.5	1	59.8	NaN	NaN	23.25	22.75	0
664	2009	11	5	1	12	58	734082	40.5	70	4	30	1.25	36	1.111	3088	1	1	1	3.5	3	0.001	0	42.583	1	63	NaN	NaN	23.3	20.55	0
665	2009	11	5	2	5	36	734082	5	70	36	20	0.25	14	0.25	14	1	5	1	3.5	2	0.429	0	60.447	11	71	NaN	NaN	22.95	22.845	NaN
666	2009	11	5	2	7	0	734082	6.5	54	38	6	0.917	10	0.65	25188	1	5	1	9	3.5	0.002	0	59.938	7	73.8	NaN	NaN	22.95	22.895	NaN
667	2009	11	5	9	7	42	734082	5.5	94	22	50	0.08	22	0.25	12	5	3	3	3.5	2.5	0.208	0	90.146	7	100.5	NaN	NaN	22.75	22.667	NaN
668	2009	11	5	9	9	28	734082	16	184	32	120	0.096	32	0.484	3966	9	1	3	5	4.5	0.008	0	82.147	11	98	NaN	NaN	22.7	22.056	6
669	2009	11	5	10	18	38	734082	41.5	212	86	68	0.559	58	0.552	634	1	11	1	20	9.5	0.102	0	66.057	13	95.3	NaN	NaN	22.95	21.749	7
670	2009	11	5	10	32	44	734082	25.5	164	80	40	0.537	44	0.432	432	1	5	1	12.5	6.5	0.134	0	72.774	29	86	NaN	NaN	22.95	22.293	12
671	2009	11	5	10	42	40	734082	39.5	202	84	64	0.492	54	0.574	110	1	5	1	18.5	8.5	0.269	0	66.105	15	94.3	NaN	NaN	22.95	21.394	8
672	2009	11	5	10	47	52	734082	64	300	180	50	0.92	70	0.686	132	1	13	1	64	28	0.417	0	59.033	15	93.3	NaN	NaN	22.95	19.471	9
673	2009	11	5	10	55	4	734082	209.5	328	36	150	1.2	142	1.475	280	11	3	1	30.5	30	0.059	0	38.132	1	92.3	NaN	NaN	22.95	14.029	4
674	2009	11	5	11	5	12	734082	95.5	224	60	64	1.313	100	0.955	776	1	11	1	28.5	12.5	0.06	0	49.427	9	100.8	NaN	NaN	22.9	15.515	5
675	2009	11	5	11	21	52	734082	248.5	468	170	108	1.769	190	1.308	400	1	15	1	76.5	61	0.196	0	42.709	9	121.3	NaN	NaN	22.95	13.03	7
676	2009	11	5	11	36	20	734082	254.5	444	130	134	1.881	180	1.414	168	1	7	1	6.5	2.5	0.212	1	60.034	19	163.5	NaN	NaN	22.95	12.651	14
677	2009	11	5	11	46	32	734082	261	432	118	130	1.969	184	1.416	394	1	7	1	11	5	0.143	1	65.683	17	NaN	NaN	1.6	22.85	12.65	2
678	2009	11	5	12	0	18	734083	268.5	432	108	144	1.833	180	1.492	424	1	11	1	10.5	4.5	0.126	1	70.518	29	NaN	NaN	-2	22.8	12.612	5
679	2009	11	5	12	14	34	734083	276	438	114	146	1.873	178	1.551	300	1	5	1	5.5	2.5	0.154	1	70.116	31	NaN	NaN	1	22.7	12.55	7
680	2009	11	5	12	26	52	734083	284.5	446	122	142	1.972	182	1.563	352	1	15	1	15.5	4.5	0.153	1	72.399	21	NaN	NaN	-1.5	22.6	12.508	3
681	2009	11	5	12	40	10	734083	294.5	408	82	144	2.031	182	1.615	178	1	11	1	7.5	2	0.14	1	68.637	23	NaN	NaN	-0.7	22.45	12.4	2
682	2009	11	5	12	49	56	734083	302.5	432	96	140	2.132	196	1.541	220	1	7	1	7.5	4	0.147	1	68.281	23	NaN	NaN	2.8	22.55	12.318	1
683	2009	11	5	13	0	48	734083	309	412	74	144	2.122	194	1.593	220	1	9	3	7.5	3.5	0.117	1	71.816	19	NaN	NaN	3.7	22.55	12.158	1
684	2009	11	5	13	11	20	734083	318	440	90	146	2.151	204	1.559	228	1	15	1	13	4	0.135	1	64.065	17	NaN	NaN	0.2	22.45	12.062	2
685	2009	11	5	13	22	28	734083	325.5	480	114	146	2.202	220	1.48	268	1	11	1	9	4	0.152	1	64.496	27	NaN	NaN	2.6	22.4	11.384	0
686	2009	11	5	13	34	56	734083	331	470	106	148	2.226	216	1.532	272	1	7	1	5.5	1.5	0.143	1	54.12	15	NaN	NaN	2.3	22.35	11.169	1
687	2009	11	5	13	47	18	734083	341	502	126	152	2.217	224	1.522	366	1	9	1	9	4.5	0.145	1	63.273	27	NaN	NaN	-0.3	22.3	10.995	5
688	2009	11	5	14	1	46	734083	351.5	486	114	156	2.215	216	1.627	434	1	13	1	12.5	5.5	0.124	1	58.935	23	NaN	NaN	0	22.2	10.85	4
689	2009	11	5	14	17	6	734083	367	548	170	162	2.238	216	1.694	312	1	5	1	7.5	4.5	0.198	1	56.032	25	NaN	NaN	1.6	22.3	10.73	6
690	2009	11	5	14	31	26	734083	380.5	536	150	164	2.29	222	1.714	364	1	9	1	10	5	0.167	1	51.694	19	NaN	NaN	1.8	22.45	10.555	2
691	2009	11	5	14	46	26	734083	394.5	546	154	168	2.313	224	1.761	632	1	11	1	12	6	0.131	1	47.119	15	NaN	NaN	1.3	22.55	10.5	3
692	2009	11	5	15	6	4	734083	9	78	24	28	0.304	26	0.288	96	1	1	1	2	1.5	0.138	0	206.154	9	216.5	NaN	NaN	22.6	22.458	6
693	2009	11	5	15	8	58	734083	5.5	34	16	8	0.625	10	0.45	100	1	3	1	2.5	1	0.119	0	218.194	5	226.3	NaN	NaN	22.6	22.572	NaN
694	2009	11	5	15	11	12	734083	408	572	158	180	2.258	234	1.739	300	1	11	1	8.5	1.5	0.181	0	42.35	5	NaN	NaN	0.9	22.6	10.328	0
695	2009	11	5	15	25	44	734083	6	34	8	16	0.375	10	0.55	226	1	1	1	0.5	0.5	0.031	0	210.45	3	212.8	NaN	NaN	22.6	22.03	0
696	2009	11	5	15	30	4	734083	388	496	98	176	2.205	222	1.741	446	1	5	1	3.5	1.5	0.104	0	48.98	7	NaN	NaN	-3	22.55	10.321	1
697	2009	11	5	15	45	46	734083	365	534	158	170	2.144	206	1.762	408	1	9	1	7.5	2.5	0.168	1	56.028	23	NaN	NaN	-0.1	22.65	10.706	0
698	2009	11	5	16	1	28	734083	349	510	150	162	2.151	198	1.755	504	1	7	1	5	2	0.148	1	70.868	25	NaN	NaN	-2.9	22.9	10.781	2
699	2009	11	5	16	18	22	734083	324.5	420	62	160	2.028	198	1.631	364	1	7	1	5.5	2	0.079	1	75.656	17	NaN	NaN	0.7	22.85	11.4	3
700	2009	11	5	16	31	26	734083	317.5	464	114	156	2.01	194	1.634	316	1	7	1	9.5	4	0.146	1	82.681	31	NaN	NaN	-2.8	23	11.392	0
701	2009	11	5	16	44	26	734083	331.5	536	182	154	2.117	200	1.658	316	1	11	1	11.5	5.5	0.214	1	82.228	39	NaN	NaN	-0.5	22.95	11.019	2
702	2009	11	5	16	58	38	734083	338	488	126	154	2.172	208	1.618	212	1	13	1	13	3.5	0.18	1	71.746	27	NaN	NaN	-3.3	22.75	10.97	1
703	2009	11	5	17	10	18	734083	339.5	472	106	150	2.233	216	1.572	214	1	9	1	10.5	4.5	0.155	1	65.194	25	NaN	NaN	2.5	22.75	10.917	0
704	2009	11	5	17	21	44	734083	346.5	504	142	148	2.294	214	1.617	330	1	9	1	12.5	7.5	0.17	1	64.201	35	NaN	NaN	0.6	22.7	10.738	3
705	2009	11	5	17	35	38	734083	347	492	130	154	2.234	208	1.659	354	1	9	1	11	3	0.154	1	67.542	31	NaN	NaN	2.9	22.45	10.734	0
706	2009	11	5	17	49	44	734083	345.5	580	198	158	2.165	224	1.54	290	1	15	5	12	3.5	0.228	1	71.097	35	NaN	NaN	-0.2	23	10.739	2
707	2009	11	5	18	4	14	734083	346	512	146	152	2.243	214	1.617	236	1	11	1	12	5	0.195	1	67.182	35	NaN	NaN	1.3	23.25	10.826	1
708	2009	11	5	18	16	42	734083	350	538	182	150	2.29	206	1.699	274	1	13	1	13.5	6.5	0.224	1	68.91	35	NaN	NaN	-1	23.15	10.922	0
709	2009	11	5	18	30	14	734083	355	592	234	154	2.26	204	1.74	346	1	15	1	16	7	0.249	1	66.623	31	NaN	NaN	-0.8	23.35	10.962	0
710	2009	11	5	18	45	52	734083	351	494	134	156	2.231	204	1.718	336	1	9	1	8.5	3	0.161	1	62.768	19	NaN	NaN	0.9	23.35	11.114	1
711	2009	11	5	18	59	42	734083	348.5	532	170	156	2.212	206	1.692	322	1	7	1	7	3.5	0.199	1	63.712	23	NaN	NaN	-4.6	23.35	11.292	0
712	2009	11	5	19	13	56	734083	350	578	214	152	2.266	212	1.649	330	1	21	3	17	5.5	0.236	1	59.356	31	NaN	NaN	1.2	23.3	10.953	1
713	2009	11	5	19	29	4	734083	350	478	122	156	2.231	200	1.75	342	1	15	1	11	2	0.149	1	59.907	15	NaN	NaN	0.2	23.25	11	2
714	2009	11	5	19	42	44	734083	347	550	194	154	2.237	202	1.71	346	1	15	1	13	2.5	0.217	1	67.727	45	NaN	NaN	0.6	23.25	11.147	0
715	2009	11	5	19	57	40	734083	345	484	126	156	2.192	202	1.705	352	1	7	1	7.5	3.5	0.151	1	65.688	21	NaN	NaN	-0.2	23.2	11.35	0
716	2009	11	5	20	11	36	734083	346	474	110	154	2.214	210	1.648	238	1	11	1	10	5	0.154	1	65.911	17	NaN	NaN	1.1	23.2	11.352	1
717	2009	11	5	20	23	28	734083	349	502	130	152	2.276	220	1.577	336	1	7	1	10	3	0.155	1	67.928	27	NaN	NaN	5.3	23.25	11.351	0
718	2009	11	5	20	37	26	734083	344.5	444	78	160	2.144	206	1.672	318	1	9	1	7.5	2	0.102	1	65.394	25	NaN	NaN	1.5	23.15	11.3	0
719	2009	11	5	20	50	8	734083	350	552	118	160	2.15	274	1.276	292	1	9	3	12.5	6	0.14	1	61.854	19	NaN	NaN	0.7	22.95	11.3	0
720	2009	11	5	21	4	12	734083	351	516	118	158	2.199	240	1.462	348	1	15	3	15.5	3.5	0.137	1	58.175	17	NaN	NaN	3.2	22.85	11.132	0
721	2009	11	5	21	18	36	734083	350.5	462	82	158	2.196	222	1.577	310	1	15	1	14	3.5	0.106	1	59.97	19	NaN	NaN	3.6	22.65	10.898	0
722	2009	11	5	21	31	28	734083	349	472	88	158	2.193	226	1.542	238	1	7	1	8	2.5	0.124	1	59.194	9	NaN	NaN	3.9	22.65	10.95	1
723	2009	11	5	21	43	18	734083	346.5	482	98	154	2.244	230	1.507	300	1	9	3	9	1.5	0.125	1	62.6	17	170.3	0.448	6.2	22.65	11.006	1
724	2009	11	5	21	56	20	734083	345	542	114	152	2.257	276	1.25	212	1	9	1	11	2	0.151	1	59.216	23	NaN	NaN	2.5	22.5	11.15	1
725	2009	11	5	22	8	54	734083	344.5	474	110	148	2.301	216	1.593	246	1	15	1	15.5	4	0.153	1	58.924	13	NaN	NaN	3.2	22.45	11.148	0
726	2009	11	5	22	20	54	734083	343.5	410	58	148	2.304	204	1.679	206	1	9	1	8.5	3	0.094	1	57.225	19	NaN	NaN	4.1	22.5	11.148	0
727	2009	11	5	22	31	10	734083	343	466	90	148	2.301	228	1.502	228	1	9	1	8	2.5	0.13	1	59.261	17	NaN	NaN	5	22.5	11.117	0
728	2009	11	5	22	42	44	734083	342.5	456	98	148	2.294	210	1.629	254	1	9	1	7.5	3	0.138	1	55.95	21	187.9	-1.441	9.9	22.55	11.122	0
729	2009	11	5	22	54	34	734083	339	466	110	148	2.274	208	1.627	272	1	5	1	8	2.5	0.149	1	54.027	17	NaN	NaN	3.1	22.5	11.15	0
730	2009	11	5	23	6	52	734083	334.5	444	90	150	2.223	204	1.635	258	1	11	1	9	2.5	0.128	1	53.679	11	NaN	NaN	5	22.55	11.243	0
731	2009	11	5	23	18	34	734083	331	470	102	142	2.32	226	1.462	752	1	7	1	6	1.5	0.083	1	51.428	15	NaN	NaN	3.9	22.55	11.26	0
732	2009	11	5	23	38	56	734083	5.5	48	6	28	0.196	14	0.286	2436	1	1	1	1.5	1.5	0.002	0	175.75	3	181	NaN	NaN	22.9	22.762	NaN
733	2009	11	6	0	20	20	734083	120	258	2	170	0.706	86	1.395	118	7	1	1	0	0	0.005	0	47.625	1	110	NaN	NaN	22.75	14.975	1
734	2009	11	6	0	26	36	734083	23	170	96	28	0.804	46	0.38	80	1	3	3	9	5.5	0.384	0	73.097	23	97.5	NaN	NaN	22.6	21.68	6
735	2009	11	6	0	30	46	734083	26	136	70	26	1	40	0.475	190	1	5	1	15	9.5	0.215	0	63.549	15	94	NaN	NaN	22.6	22.029	6
736	2009	11	6	0	36	12	734083	14.5	122	72	22	0.523	28	0.411	58	1	7	1	9	3.5	0.4	0	60.959	15	78	NaN	NaN	22.6	22.52	NaN
737	2009	11	6	0	39	12	734083	13.5	130	86	18	0.556	26	0.462	62	1	13	1	14	3.5	0.448	1	56.034	9	79.3	NaN	NaN	22.6	22.489	2
738	2009	11	6	0	42	24	734083	13.5	128	84	24	0.438	20	0.5	68	1	5	1	11.5	3.5	0.429	1	52.488	13	70.3	NaN	NaN	22.65	22.427	7
739	2009	11	6	0	45	40	734083	30	138	4	98	0.296	36	0.792	1386	5	1	1	2.5	1.5	0.003	0	46.333	1	62.5	NaN	NaN	22.6	22.133	23
740	2009	11	6	1	11	4	734083	30.5	138	38	58	0.526	42	0.548	176	1	5	1	11.5	9	0.121	1	43.138	1	68.8	NaN	NaN	22.7	22.197	21
741	2009	11	6	1	16	18	734083	32.5	124	20	50	0.65	54	0.472	474	1	1	1	7	7	0.033	1	41.318	3	62.3	NaN	NaN	22.6	22.4	NaN
742	2009	11	6	1	26	16	734083	7.5	82	54	12	0.5	16	0.344	140	1	1	1	3.5	2	0.243	0	46.205	3	62.8	NaN	NaN	22.65	22.639	NaN
743	2009	11	6	1	29	58	734083	19.5	102	38	30	0.483	34	0.529	52	1	1	1	6.5	5	0.247	0	43.712	1	61.5	NaN	NaN	22.7	22.593	NaN
744	2009	11	6	1	32	32	734083	27	134	50	38	0.579	46	0.413	82	1	1	1	13	8	0.231	0	41.231	1	74.5	NaN	NaN	22.6	22.558	NaN
745	2009	11	6	1	36	8	734083	13.5	104	44	20	0.575	40	0.237	66	1	1	3	6	4	0.259	0	44.717	3	64	NaN	NaN	22.6	22.6	NaN
746	2009	11	6	1	38	58	734083	7	80	42	16	0.344	22	0.25	54	1	1	1	3	1.5	0.313	0	47.136	1	59.3	NaN	NaN	22.6	22.6	NaN
747	2009	11	6	1	41	12	734083	18.5	102	28	32	0.531	42	0.405	64	1	5	1	7	3	0.169	0	43.3	5	63.8	NaN	NaN	22.6	22.593	NaN
748	2009	11	6	1	43	58	734083	8	96	54	24	0.292	18	0.333	70	3	3	1	4	2	0.325	0	46.116	7	60.8	NaN	NaN	22.6	22.6	NaN
749	2009	11	6	1	46	44	734083	17	112	34	44	0.307	34	0.456	390	1	3	1	6	3.5	0.068	0	43.236	1	63.8	NaN	NaN	22.6	22.6	NaN
750	2009	11	6	1	55	6	734083	16	106	52	24	0.479	30	0.383	80	1	3	1	10	4.5	0.28	1	44.065	5	67.3	NaN	NaN	22.6	22.6	NaN
751	2009	11	6	1	58	12	734083	9	92	52	16	0.5	24	0.292	54	1	3	1	6	2.5	0.356	0	46.491	3	59	NaN	NaN	22.6	22.602	NaN
752	2009	11	6	2	0	38	734083	9.5	92	44	18	0.528	30	0.267	46	1	5	3	3.5	1.5	0.319	1	46.304	1	72.3	NaN	NaN	22.6	22.6	NaN
753	2009	11	6	2	2	56	734083	8	124	100	12	0.542	12	0.5	58	1	5	1	13.5	4.5	0.549	0	46.623	9	66	NaN	NaN	22.6	22.6	NaN
754	2009	11	6	2	5	58	734083	8.5	112	82	10	0.7	20	0.375	62	1	7	1	7.5	2.5	0.471	1	47.25	7	71.3	NaN	NaN	22.6	22.6	NaN
755	2009	11	6	2	8	52	734083	14	72	32	20	0.55	20	0.7	28	1	1	1	3	3	0.32	0	46.118	3	73.5	NaN	NaN	22.55	22.6	NaN
756	2009	11	6	2	10	32	734083	9	116	62	32	0.203	22	0.364	80	1	1	1	3.5	2.5	0.316	0	46.258	9	63.5	NaN	NaN	22.6	22.6	NaN
757	2009	11	6	2	13	48	734083	15	128	44	40	0.35	44	0.25	76	1	3	1	8	5	0.216	0	45.217	5	62	NaN	NaN	22.6	22.6	NaN
758	2009	11	6	2	17	12	734083	10	116	74	22	0.364	20	0.35	40	1	3	1	8	3	0.474	0	45.921	5	64	NaN	NaN	22.6	22.6	NaN
759	2009	11	6	2	19	48	734083	8	86	50	18	0.333	18	0.444	46	1	5	1	5	2	0.379	0	47.394	5	74.3	NaN	NaN	22.55	22.6	NaN
760	2009	11	6	2	21	60	734083	11	132	78	16	0.5	38	0.211	66	1	9	1	12	3.5	0.394	0	45.85	3	63.3	NaN	NaN	22.6	22.644	NaN
761	2009	11	6	2	25	18	734083	10	128	80	28	0.286	20	0.4	60	1	5	1	8	2	0.426	1	45.482	11	73.3	NaN	NaN	22.65	22.696	NaN
762	2009	11	6	2	28	26	734083	8	96	62	18	0.361	16	0.5	50	1	7	1	5.5	1.5	0.425	0	47.055	11	65.5	NaN	NaN	22.65	22.65	NaN
763	2009	11	6	2	30	52	734083	8	90	58	16	0.406	16	0.406	36	1	3	1	6	2.5	0.46	1	45.95	5	60.3	NaN	NaN	22.65	22.7	NaN
764	2009	11	6	2	32	58	734083	7	114	80	22	0.227	12	0.5	34	1	7	1	7	2	0.541	0	48.207	7	73	NaN	NaN	22.7	22.7	NaN
765	2009	11	6	2	35	26	734083	7	62	36	12	0.417	14	0.429	74	1	1	1	3	2	0.265	1	48.921	3	73.8	NaN	NaN	22.7	22.7	NaN
766	2009	11	6	2	37	42	734083	6	86	48	22	0.25	16	0.281	72	1	3	1	4	1.5	0.304	0	48.08	5	64.5	NaN	NaN	22.7	22.692	NaN
767	2009	11	6	2	40	20	734083	21.5	94	4	68	0.287	22	0.932	40	5	1	1	3	2	0.03	0	44.5	1	57.8	NaN	NaN	22.65	22.617	10
768	2009	11	6	2	42	34	734083	12.5	112	60	22	0.409	30	0.317	54	1	9	1	10.5	3.5	0.361	0	47.323	7	66.3	NaN	NaN	22.65	22.655	NaN
769	2009	11	6	2	45	20	734083	9	112	22	64	0.141	26	0.308	12	7	3	1	7	4	0.177	0	48.438	5	61.3	NaN	NaN	22.65	22.658	NaN
770	2009	11	6	2	47	24	734083	242.5	328	14	110	2.2	204	1.189	148	1	3	3	5.5	3	0.029	0	38.719	1	60.3	NaN	NaN	22.65	12.769	17
771	2009	11	6	2	55	20	734083	8	80	36	32	0.188	12	0.667	76	3	5	1	8	4.5	0.231	0	53	7	68.5	NaN	NaN	22.6	22.616	NaN
772	2009	11	6	2	57	56	734083	14.5	92	54	24	0.604	14	0.786	50	1	7	1	7.5	3.5	0.38	0	52.554	7	67.8	NaN	NaN	22.6	22.63	NaN
773	2009	11	6	3	0	18	734083	12.5	100	66	22	0.568	12	0.875	46	1	7	1	15	4.5	0.452	0	52.64	13	67.5	NaN	NaN	22.6	22.615	NaN
774	2009	11	6	3	2	44	734083	12.5	114	70	14	0.75	30	0.317	30	1	5	3	8	3.5	0.486	1	55.917	19	69.3	NaN	NaN	22.6	22.618	NaN
775	2009	11	6	3	5	8	734083	12	104	62	26	0.365	16	0.656	34	1	3	1	8	3	0.449	1	56.203	17	82	NaN	NaN	22.6	22.603	NaN
776	2009	11	6	3	7	26	734083	35	132	2	102	0.343	28	1.25	52	3	1	1	0	0	0.011	0	46.5	1	73.5	NaN	NaN	22.6	20.35	15
777	2009	11	6	3	10	30	734083	16	90	40	34	0.471	16	0.75	30	1	3	1	11	6.5	0.333	0	53.298	7	77.3	NaN	NaN	22.6	22.576	13
778	2009	11	6	3	12	30	734083	19.5	126	4	40	0.475	82	0.226	38	3	1	5	1.5	1	0.024	0	53.333	1	75	NaN	NaN	22.6	22.45	NaN
779	2009	11	6	3	15	14	734083	26	56	4	18	1.389	34	0.735	30	1	1	1	2	1	0.047	0	51.5	1	71.8	NaN	NaN	22.6	22.133	12
780	2009	11	6	3	16	40	734083	31	140	14	90	0.344	36	0.611	56	3	3	3	10	9.5	0.071	0	48.188	3	74.3	NaN	NaN	22.6	22.138	10
781	2009	11	6	3	19	56	734083	21.5	90	48	30	0.517	12	1.792	26	1	3	1	13	9.5	0.414	0	55.19	13	74.8	NaN	NaN	22.55	22.524	7
782	2009	11	6	3	21	52	734083	234.5	256	4	70	3.321	182	1.286	108	1	1	1	2.5	2	0.011	0	40.25	1	70.5	NaN	NaN	22.6	12.967	2
783	2009	11	6	3	27	56	734083	19.5	110	64	32	0.516	14	1.393	72	3	7	1	13	6.5	0.352	0	59.22	19	80.3	NaN	NaN	22.55	22.465	NaN
784	2009	11	6	3	30	58	734083	55.5	216	4	178	0.278	34	1.559	80	11	1	1	8.5	6	0.014	0	48.5	1	77.5	NaN	NaN	22.55	17.033	0
785	2009	11	6	3	35	54	734083	51	124	4	106	0.458	14	3.179	78	3	1	1	9	6.5	0.02	1	47.167	1	76.8	NaN	NaN	22.55	17.05	8
786	2009	11	6	3	39	16	734083	37	162	86	42	0.881	34	0.941	50	1	5	1	21	9	0.406	0	53.705	15	83.5	NaN	NaN	22.5	19.4	1
787	2009	11	6	3	42	48	734083	58	192	4	102	0.549	86	0.669	52	5	1	3	2.5	2	0.016	0	47.333	1	84.8	NaN	NaN	22.5	16.617	7
788	2009	11	6	3	46	52	734083	26	160	102	30	0.833	28	0.786	34	1	7	1	14	4	0.526	0	58.481	27	75.8	NaN	NaN	22.5	19.851	4
789	2009	11	6	3	50	6	734083	30.5	158	86	36	0.667	36	0.722	48	1	7	1	16	6.5	0.417	0	56.136	19	73.8	NaN	NaN	22.5	19.087	2
790	2009	11	6	3	53	32	734083	54.5	190	48	86	0.634	56	0.83	56	1	3	1	27	17.5	0.195	0	48.39	5	74.5	NaN	NaN	22.5	17.026	2
791	2009	11	6	3	57	38	734083	36.5	140	36	58	0.466	46	0.793	52	1	5	1	15.5	12	0.188	0	54.974	7	79.3	NaN	NaN	22.5	19.161	8
792	2009	11	6	4	0	50	734083	65.5	164	4	140	0.454	20	3.075	20	9	1	1	6	4	0.022	0	45.333	1	80.3	NaN	NaN	22.45	16.467	7
793	2009	11	6	4	3	54	734083	5.5	14	2	8	0.688	4	1.375	140	1	1	1	0	0	0.013	0	67.375	1	75.8	NaN	NaN	22.45	22.45	NaN
794	2009	11	6	4	6	28	734083	27.5	140	84	28	0.929	28	0.857	44	1	7	1	9	3.5	0.457	0	59.029	15	76.8	NaN	NaN	22.45	19.578	10
795	2009	11	6	4	9	32	734083	41	150	72	42	0.821	36	1.139	52	1	9	1	15.5	8.5	0.356	0	57.608	7	92	NaN	NaN	22.4	18.641	11
796	2009	11	6	4	12	54	734083	46	176	116	32	1.266	28	1.357	70	1	11	1	35.5	8	0.472	0	52.038	15	92	NaN	NaN	22.4	18.706	13
797	2009	11	6	4	17	0	734083	48	214	122	34	1.294	58	0.776	56	1	9	3	41	12	0.452	1	53.802	15	96.8	NaN	NaN	22.4	18.787	11
798	2009	11	6	4	21	30	734083	60	206	126	34	1.309	46	1.304	70	1	11	1	39.5	16	0.457	0	51.223	21	100.8	NaN	NaN	22.35	18.161	16
799	2009	11	6	4	26	6	734083	95.5	132	2	96	0.995	34	2.809	12	5	1	1	0	0	0.014	0	42.875	1	72.3	NaN	NaN	22.35	15.65	9
800	2009	11	6	4	28	30	734083	200.5	194	6	58	3.431	130	1.542	232	1	1	1	1.5	1.5	0.014	0	41.125	1	91.8	NaN	NaN	22.35	13.75	0
801	2009	11	6	4	35	36	734083	64	96	22	48	1.021	26	2.462	126	1	1	1	15	15	0.099	0	50.167	3	85.5	NaN	NaN	22.35	17.529	4
802	2009	11	6	4	39	18	734083	108	152	4	62	1.702	86	1.244	70	1	1	1	3.5	2.5	0.018	0	45.083	1	85.3	NaN	NaN	22.3	15.333	12
803	2009	11	6	4	43	0	734083	58	106	58	32	1.375	16	3.125	14	1	3	1	32	14	0.483	0	49.108	7	93	NaN	NaN	22.3	17.238	7
804	2009	11	6	4	45	0	734083	173.5	186	6	70	2.464	110	1.573	214	1	1	1	1.5	1	0.015	0	40.063	1	80.3	NaN	NaN	22.3	14.25	9
805	2009	11	6	4	51	40	734083	99	158	4	78	1.231	76	1.276	66	1	1	1	5	3	0.018	0	43.083	1	76.8	NaN	NaN	22.3	15.667	7
806	2009	11	6	4	55	24	734083	76.5	222	4	154	0.487	64	1.188	68	7	1	1	2	1.5	0.014	0	46.917	1	77.3	NaN	NaN	22.3	15.85	2
807	2009	11	6	5	0	14	734083	62	76	4	52	1.163	20	2.95	12	1	1	1	4.5	3	0.045	0	51.583	1	78.3	NaN	NaN	22.25	16.233	10
808	2009	11	6	5	1	42	734083	126	174	18	72	1.701	84	1.446	224	1	1	1	8	4.5	0.045	0	40.45	1	83.5	NaN	NaN	22.25	14.835	9
809	2009	11	6	5	8	20	734083	80	160	4	84	0.917	72	1.09	78	5	1	1	4.5	3	0.017	0	49.25	1	90.5	NaN	NaN	22.25	15.8	5
810	2009	11	6	5	12	18	734083	89.5	108	4	68	1.279	36	2.431	102	1	1	1	4.5	2.5	0.019	0	46.917	1	83.5	NaN	NaN	22.25	15.767	8
811	2009	11	6	5	15	48	734083	114.5	228	64	80	1.056	84	1.363	90	1	3	1	76	53	0.201	0	44.515	3	94.5	NaN	NaN	22.25	15.847	8
812	2009	11	6	5	21	6	734083	111.5	176	4	56	1.92	116	0.931	84	1	1	3	7.5	4	0.015	1	44.75	1	87.5	NaN	NaN	22.2	15.083	12
813	2009	11	6	5	25	26	734083	111	250	84	78	1.237	88	1.261	90	1	3	1	84.5	49.5	0.247	1	44.645	9	73	NaN	NaN	22.25	15.798	8
814	2009	11	6	5	31	6	734083	125	200	4	78	1.59	118	1.055	72	1	1	1	1.5	1	0.015	0	43.5	1	91.5	NaN	NaN	22.25	14.883	0
815	2009	11	6	5	35	38	734083	99.5	226	4	96	1.031	126	0.766	1658	1	1	3	3.5	3	0.002	0	44.25	1	79.3	NaN	NaN	22.2	15.333	5
816	2009	11	6	6	7	2	734083	83	174	40	66	1.258	68	1.015	104	1	3	1	22	18	0.144	0	49.905	9	96.8	NaN	NaN	22.25	15.938	11
817	2009	11	6	6	11	40	734083	83.5	208	44	74	0.932	90	0.85	8458	1	3	1	27.5	14.5	0.005	1	48.467	3	77.5	NaN	NaN	22.25	15.883	13
818	2009	11	6	8	36	6	734083	93.5	206	18	64	1.461	124	0.69	1844	1	1	3	8	8	0.009	0	48.2	3	91	NaN	NaN	22.2	15.775	22
819	2009	11	6	9	10	16	734083	89.5	262	2	86	1.041	174	0.514	1544	1	1	3	0	0	0.001	1	51.125	1	99	NaN	NaN	22.25	15.8	22
820	2009	11	6	9	40	22	734083	56	166	26	42	1.333	98	0.459	3666	1	1	1	11	11	0.007	0	65.964	5	91.8	NaN	NaN	22.25	17.179	25
821	2009	11	6	10	44	14	734083	153.5	284	90	88	1.284	106	1.448	180	1	13	1	66.5	47.5	0.194	0	41.522	5	93.3	NaN	NaN	22.35	14.635	8
822	2009	11	6	10	51	58	734083	235.5	404	86	156	1.144	162	1.454	254	1	9	1	77	61	0.131	0	36.432	9	98.3	NaN	NaN	22.35	13.844	10
823	2009	11	6	11	2	56	734083	125	322	152	68	1.618	102	1.088	776	1	9	1	48	19.5	0.138	0	49.503	11	104.5	NaN	NaN	22.35	14.827	10
824	2009	11	6	11	21	14	734083	320	450	110	134	2.067	206	1.544	358	1	5	1	48	43	0.136	0	38.152	3	143.3	NaN	NaN	22.4	11.415	6
825	2009	11	6	11	34	42	734083	322	536	162	162	1.975	212	1.498	266	1	7	3	9.5	5	0.202	1	44.659	13	170	NaN	NaN	22.4	11.731	4
826	2009	11	6	11	48	4	734083	318.5	500	134	152	2.072	214	1.488	190	1	7	3	8.5	4.5	0.194	1	55.085	15	NaN	NaN	0.3	22.45	10.967	8
827	2009	11	6	11	59	34	734083	322	420	56	154	2.075	210	1.533	156	1	5	3	5.5	3	0.097	1	56.069	7	NaN	NaN	1.6	22.4	11.01	13
828	2009	11	6	12	9	10	734084	322	408	52	146	2.192	210	1.531	160	1	7	1	8.5	4	0.092	1	56.537	15	NaN	NaN	0.6	22.4	11.017	9
829	2009	11	6	12	18	38	734084	322.5	434	76	146	2.195	212	1.519	212	1	3	1	5.5	2.5	0.118	1	61.795	15	NaN	NaN	0.4	22.4	11	5
830	2009	11	6	12	29	24	734084	319.5	442	86	142	2.236	214	1.491	226	1	5	1	5.5	2.5	0.129	1	64.159	21	175.5	-10.413	6	22.45	10.869	9
831	2009	11	6	12	40	32	734084	318	440	82	140	2.254	218	1.45	216	1	15	1	23.5	5.5	0.125	1	65.179	19	NaN	NaN	3.9	22.5	10.69	20
832	2009	11	6	12	51	28	734084	313.5	412	68	146	2.14	198	1.583	226	1	7	1	5	2	0.107	1	71.643	15	NaN	NaN	3.8	22.5	10.846	15
833	2009	11	6	13	2	6	734084	318	404	64	142	2.204	198	1.606	248	1	13	1	14	5.5	0.098	1	69.03	15	NaN	NaN	1.4	22.5	10.492	19
834	2009	11	6	13	12	58	734084	322.5	452	98	150	2.117	204	1.581	320	1	11	1	12	5	0.127	1	72.195	27	NaN	NaN	0.3	22.55	10.331	21
835	2009	11	6	13	25	50	734084	318	394	34	158	1.991	202	1.574	290	1	5	1	7.5	4	0.05	1	73.014	11	NaN	NaN	-0.1	22.6	10.428	0
836	2009	11	6	13	37	14	734084	318.5	422	72	154	1.974	196	1.62	256	1	3	1	19.5	14.5	0.106	1	70.669	15	NaN	NaN	0	22.55	10.393	11
837	2009	11	6	13	48	32	734084	322	524	142	154	2.088	228	1.401	368	1	13	3	79	34	0.159	1	71.34	23	NaN	NaN	-4.1	22.55	10.387	19
838	2009	11	6	14	3	24	734084	322.5	428	72	150	2.133	206	1.558	380	1	9	1	15	4	0.089	1	68.534	21	NaN	NaN	-3.9	22.55	10.351	8
839	2009	11	6	14	16	52	734084	322	436	78	150	2.12	208	1.526	314	1	5	3	12.5	4.5	0.104	1	63.663	17	NaN	NaN	-0.3	22.55	10.487	15
840	2009	11	6	14	29	22	734084	319	440	82	138	2.246	220	1.448	340	1	9	1	20.5	9	0.105	1	70.452	25	NaN	NaN	1.4	22.55	10.52	20
841	2009	11	6	14	42	22	734084	319	506	178	140	2.225	188	1.697	312	1	3	1	9.5	7.5	0.218	1	75.914	37	NaN	NaN	3.5	22.55	10.505	4
842	2009	11	6	14	56	0	734084	316.5	432	80	140	2.236	212	1.488	366	1	9	3	9.5	3.5	0.1	1	71.927	13	NaN	NaN	-2.3	22.55	10.426	7
843	2009	11	6	15	9	18	734084	326	514	162	142	2.204	210	1.552	448	1	5	1	14.5	12.5	0.168	1	76.314	37	NaN	NaN	3.3	22.5	10.454	4
844	2009	11	6	15	25	20	734084	328	488	130	146	2.127	212	1.547	366	1	7	3	24.5	17.5	0.152	1	68.095	17	NaN	NaN	0.9	22.45	10.452	1
845	2009	11	6	15	39	34	734084	329	464	94	154	2.088	216	1.521	356	1	11	1	14	7.5	0.115	1	71.417	15	NaN	NaN	-2.3	22.7	10.539	1
846	2009	11	6	15	53	14	734084	333.5	466	102	154	2.114	210	1.588	296	1	5	1	9.5	7.5	0.134	1	65.942	13	NaN	NaN	-1	22.75	10.509	3
847	2009	11	6	16	5	56	734084	327.5	458	100	142	2.303	216	1.509	552	1	9	1	16	5.5	0.099	1	70.137	19	NaN	NaN	-2.3	22.6	10.187	3
848	2009	11	6	16	22	46	734084	324	484	138	152	2.115	194	1.67	1490	1	15	1	12.5	3	0.07	1	75.318	27	NaN	NaN	-0.4	22.55	10.151	1
849	2009	11	6	16	55	40	734084	326	488	146	146	2.199	196	1.615	760	1	15	1	74.5	19	0.117	1	82.253	39	173.4	1.069	6.3	22.35	10.422	1
850	2009	11	6	17	16	28	734084	354.5	534	182	148	2.334	204	1.738	2124	1	7	1	13	9	0.068	1	67.204	29	NaN	NaN	-1.2	22.35	10.347	0
851	2009	11	6	18	0	46	734084	361.5	560	166	164	2.198	230	1.561	404	1	9	1	9.5	3	0.172	1	65.068	25	NaN	NaN	2.2	22.35	10.392	1
852	2009	11	6	18	16	50	734084	338	494	114	158	2.117	222	1.52	236	1	7	1	8	3.5	0.156	1	65.448	17	NaN	NaN	0.6	22.4	10.75	0
853	2009	11	6	18	29	0	734084	330.5	584	210	148	2.199	226	1.46	244	1	9	1	10.5	5	0.254	1	69.269	39	NaN	NaN	4.1	22.3	10.937	2
854	2009	11	6	18	42	48	734084	325.5	538	178	146	2.188	214	1.521	700	1	1	1	5.5	5.5	0.144	1	75.742	35	NaN	NaN	0.5	22.25	10.878	1
855	2009	11	6	19	3	26	734084	317	512	162	144	2.194	206	1.529	258	1	19	3	13	2.5	0.21	1	78.68	27	NaN	NaN	2	22.65	11.12	1
856	2009	11	6	19	16	16	734084	292.5	518	202	128	2.258	188	1.556	180	1	9	3	8.5	3.5	0.289	1	88.172	51	NaN	NaN	3.8	22.55	11.635	2
857	2009	11	6	19	27	54	734084	286	432	130	122	2.324	180	1.586	336	1	11	1	12.5	2.5	0.169	1	85.973	43	NaN	NaN	1.1	22.5	12.005	0
858	2009	11	6	19	40	42	734084	295	506	194	134	2.164	178	1.657	556	1	9	1	10	6	0.183	1	91.908	55	NaN	NaN	0.5	22.7	11.751	0
859	2009	11	6	19	58	24	734084	315	530	194	144	2.142	192	1.638	286	1	1	1	7	6.5	0.238	1	89.796	55	NaN	NaN	2.2	22.9	11.252	2
860	2009	11	6	20	12	0	734084	313.5	530	202	140	2.193	188	1.668	270	1	3	1	7.5	6.5	0.253	1	89.343	57	NaN	NaN	2.2	22.75	11.225	1
861	2009	11	6	20	25	20	734084	319.5	456	100	150	2.107	206	1.551	258	1	15	1	11.5	3.5	0.14	1	84.985	23	NaN	NaN	2.5	22.95	11.02	1
862	2009	11	6	20	37	14	734084	326.5	476	122	148	2.176	206	1.583	244	1	11	1	10	4.5	0.169	1	83.798	35	NaN	NaN	-0.5	22.75	10.751	1
863	2009	11	6	20	49	14	734084	332	488	122	154	2.133	212	1.564	230	1	17	1	13	3.5	0.17	1	80.456	29	NaN	NaN	2.4	23.05	10.7	1
864	2009	11	6	21	1	12	734084	336	492	84	150	2.213	258	1.302	230	1	5	3	6	4	0.116	1	76.849	29	NaN	NaN	2.2	23.05	10.71	1
865	2009	11	6	21	13	14	734084	337	478	58	152	2.197	268	1.257	188	1	5	5	6	3	0.087	1	75.608	13	NaN	NaN	2.9	23.25	10.763	2
866	2009	11	6	21	24	20	734084	339	478	114	148	2.267	216	1.569	266	1	7	3	7.5	3.5	0.153	1	71.974	21	NaN	NaN	2.3	23.15	10.719	3
867	2009	11	6	21	36	44	734084	339.5	492	106	150	2.23	236	1.439	286	1	7	3	10	5	0.136	1	74.824	23	NaN	NaN	1.5	23.1	10.7	1
868	2009	11	6	21	49	42	734084	342.5	466	100	148	2.284	218	1.571	270	1	11	1	12.5	4.5	0.136	1	71.529	17	NaN	NaN	0.2	22.9	10.7	0
869	2009	11	6	22	1	58	734084	344	468	102	146	2.329	220	1.564	308	1	9	1	9	4	0.131	1	59.063	17	NaN	NaN	2.8	23.1	10.6	0
870	2009	11	6	22	14	54	734084	112.5	228	12	66	1.705	150	0.75	1336	1	1	3	0	0	0.008	0	140.964	3	NaN	NaN	2.4	22.85	15.05	4
871	2009	11	6	22	40	58	734084	329	484	130	146	2.253	208	1.56	702	1	9	1	8.5	4.5	0.11	0	66.322	25	NaN	NaN	1.3	22.85	10.723	0
872	2009	11	6	23	0	44	734084	5.5	60	24	26	0.173	10	0.45	234	1	1	1	2	1	0.082	0	192.769	7	198	NaN	NaN	22.8	22.75	NaN
873	2009	11	6	23	5	38	734084	8	70	30	20	0.4	20	0.35	666	1	3	1	2	1.5	0.041	0	190	9	193.3	NaN	NaN	22.8	22.675	NaN
874	2009	11	6	23	17	54	734084	5	72	44	18	0.25	10	0.4	62	1	3	1	2.5	1	0.328	0	187.609	13	197	NaN	NaN	22.85	22.707	NaN
875	2009	11	6	23	20	8	734084	10.5	86	32	20	0.525	34	0.221	152	1	1	1	3	3	0.134	0	184.838	9	NaN	NaN	4.9	22.9	22.547	5
876	2009	11	6	23	24	6	734084	345	582	202	162	2.105	218	1.583	1784	1	11	1	8.5	3.5	0.085	0	50.275	25	NaN	NaN	2.8	22.95	10.259	2
877	2009	11	7	0	3	32	734084	23	120	32	40	0.487	48	0.438	308	1	1	1	5.5	3.5	0.075	0	127.059	13	151.5	NaN	NaN	22.7	19.094	7
878	2009	11	7	0	10	40	734084	35	170	60	46	0.739	64	0.492	30	1	5	1	6.5	3.5	0.3	0	104.927	25	133.8	NaN	NaN	22.8	16.808	11
879	2009	11	7	0	14	0	734084	152	290	124	66	1.773	100	1.425	154	3	15	1	100.5	39	0.279	0	49.563	13	104.8	NaN	NaN	22.6	14.649	6
880	2009	11	7	0	21	24	734084	106.5	226	4	116	0.918	106	1.005	130	3	1	1	0	0	0.011	0	46.833	1	115.3	NaN	NaN	22.65	15	6
881	2009	11	7	0	27	20	734084	21	178	120	28	0.696	30	0.517	72	1	5	1	11	5.5	0.48	0	74.881	35	102.8	NaN	NaN	22.7	21.29	16
882	2009	11	7	0	31	30	734084	17	154	114	18	0.861	22	0.636	46	1	5	1	12.5	3.5	0.57	0	68.297	29	93.8	NaN	NaN	22.7	22.585	NaN
883	2009	11	7	0	34	50	734084	15.5	132	92	16	0.688	24	0.5	64	1	1	1	8	4.5	0.469	1	64.319	29	88.3	NaN	NaN	22.6	22.648	NaN
884	2009	11	7	0	38	6	734084	19	142	90	28	0.482	24	0.792	70	1	9	1	15.5	9	0.425	0	59.114	25	80.3	NaN	NaN	22.8	22.724	4
885	2009	11	7	0	41	38	734084	12.5	116	72	24	0.479	20	0.5	134	1	9	1	12.5	4.5	0.288	0	55.108	11	69.5	NaN	NaN	22.8	22.728	NaN
886	2009	11	7	0	45	48	734084	6	40	18	10	0.45	12	0.417	746	1	1	1	2.5	1.5	0.023	0	55.325	3	75.5	NaN	NaN	22.65	22.655	NaN
887	2009	11	7	0	58	54	734084	5.5	50	12	20	0.25	18	0.222	96	1	1	1	2	1.5	0.082	1	50.75	1	61.3	NaN	NaN	22.65	22.7	NaN
888	2009	11	7	1	1	20	734084	7.5	106	76	10	0.55	20	0.3	338	1	5	1	6.5	2	0.171	0	49.519	13	60.8	NaN	NaN	22.7	22.7	NaN
889	2009	11	7	1	8	44	734084	7	74	42	12	0.417	20	0.25	180	1	3	1	5	2	0.165	1	49.773	7	63.8	NaN	NaN	22.7	22.657	NaN
890	2009	11	7	1	12	58	734084	8	94	66	12	0.542	16	0.375	90	1	3	1	4.5	2	0.359	0	50.243	11	66.8	NaN	NaN	22.65	22.607	NaN
891	2009	11	7	1	16	2	734084	7.5	84	56	16	0.469	12	0.458	100	1	5	1	6	3.5	0.304	1	50.853	13	65.8	NaN	NaN	22.55	22.59	NaN
892	2009	11	7	1	19	6	734084	10.5	78	26	30	0.317	22	0.341	226	1	1	1	4	3	0.086	0	48.054	5	64.3	NaN	NaN	22.6	22.6	NaN
893	2009	11	7	1	24	10	734084	7.5	64	36	10	0.6	18	0.361	1098	1	1	1	2.5	1.5	0.031	0	51.171	5	68.8	NaN	NaN	22.55	22.55	NaN
894	2009	11	7	1	43	32	734084	18	88	14	26	0.692	48	0.302	74	1	1	1	3.5	3.5	0.086	0	46.75	3	58.3	NaN	NaN	22.6	22.475	NaN
895	2009	11	7	1	46	14	734084	8	104	80	10	0.6	14	0.429	132	1	3	1	8	2	0.339	0	49.805	15	62.8	NaN	NaN	22.75	22.727	NaN
896	2009	11	7	1	50	10	734084	11.5	92	40	14	0.643	38	0.224	380	1	3	1	6.5	3	0.085	0	48.429	7	63.8	NaN	NaN	22.6	22.6	NaN
897	2009	11	7	1	58	2	734084	18.5	100	24	28	0.661	48	0.281	312	1	1	1	5	5	0.058	0	48.673	5	60.5	NaN	NaN	22.55	22.504	NaN
898	2009	11	7	2	4	54	734084	28	120	14	40	0.7	66	0.402	216	1	1	1	1.5	1.5	0.042	0	45.313	3	57.3	NaN	NaN	22.5	22.3	NaN
899	2009	11	7	2	10	30	734084	7	38	10	6	1.083	22	0.295	278	1	1	1	1	0.5	0.032	0	53.083	1	68.8	NaN	NaN	22.6	22.625	2
900	2009	11	7	2	15	46	734084	8	82	34	14	0.5	34	0.176	1190	1	1	1	3	2	0.027	0	49.667	7	66.8	NaN	NaN	22.75	22.656	NaN
901	2009	11	7	2	36	58	734084	14.5	106	56	18	0.667	32	0.328	72	1	5	1	9.5	4	0.315	0	46.914	7	68	NaN	NaN	22.4	22.331	2
902	2009	11	7	2	39	56	734084	12	104	50	20	0.6	34	0.25	200	1	7	1	7.5	3.5	0.164	0	49.01	3	61.5	NaN	NaN	22.4	22.256	9
903	2009	11	7	2	45	0	734084	8	84	40	18	0.417	26	0.25	818	1	1	1	2	1.5	0.044	0	48.119	5	67.3	NaN	NaN	22.5	22.321	0
904	2009	11	7	3	0	2	734084	14	124	64	28	0.5	32	0.438	272	1	11	1	11	3	0.162	0	44.379	3	68.3	NaN	NaN	23.15	22.87	2
905	2009	11	7	3	6	38	734084	12.5	110	44	20	0.5	46	0.196	116	1	3	1	7	3.5	0.195	0	45.924	5	59.8	NaN	NaN	23.15	23.12	NaN
906	2009	11	7	3	10	24	734084	16	134	58	50	0.26	26	0.442	72	1	3	1	8.5	4.5	0.282	0	44.933	7	60	NaN	NaN	23.15	22.945	NaN
907	2009	11	7	3	13	50	734084	27.5	154	62	46	0.554	46	0.424	92	1	3	3	11	8	0.252	0	42.836	5	58	NaN	NaN	23.1	22.627	17
908	2009	11	7	3	17	56	734084	28	122	42	54	0.37	26	0.808	60	1	3	1	21	10	0.231	1	41.909	5	66	NaN	NaN	23.15	22.693	10
909	2009	11	7	3	20	58	734084	26	150	86	18	1.083	46	0.467	56	1	7	3	26	9	0.417	1	42.648	13	70.8	NaN	NaN	23.15	22.744	3
910	2009	11	7	3	24	24	734084	24.5	170	114	30	0.633	26	0.942	78	1	13	1	26.5	10.5	0.46	1	42.728	13	71.5	NaN	NaN	23.1	22.759	7
911	2009	11	7	3	28	32	734084	19.5	186	144	22	0.75	20	0.925	62	1	19	1	31	4.5	0.581	0	42.147	11	66.8	NaN	NaN	23.15	22.829	6
912	2009	11	7	3	32	40	734084	23.5	172	104	40	0.55	28	0.714	58	1	9	1	28	7	0.452	0	44.552	7	72.3	NaN	NaN	23	22.686	12
913	2009	11	7	3	36	30	734084	22	166	106	30	0.7	30	0.7	64	1	13	1	32	8	0.461	1	42.046	11	62	NaN	NaN	23.1	22.853	8
914	2009	11	7	3	40	20	734084	20	166	106	32	0.594	28	0.714	52	1	11	1	25	6	0.486	1	44.069	11	65.5	NaN	NaN	23.05	22.93	16
915	2009	11	7	3	43	58	734084	20.5	146	48	52	0.356	46	0.315	48	3	1	7	8	6	0.247	1	44.29	7	60.3	NaN	NaN	23.05	22.964	16
916	2009	11	7	3	47	12	734084	17	156	98	36	0.333	22	0.705	56	3	11	1	15.5	5.5	0.462	0	46.615	11	61	NaN	NaN	23.05	23.009	NaN
917	2009	11	7	3	50	44	734084	15	178	136	24	0.563	18	0.806	52	1	9	1	16	4	0.591	0	48.297	13	65.5	NaN	NaN	23	22.966	5
918	2009	11	7	3	54	34	734084	19.5	132	52	60	0.325	20	0.7	42	3	7	1	10.5	5.5	0.299	0	45.093	5	61.5	NaN	NaN	23	22.952	NaN
919	2009	11	7	3	57	28	734084	16.5	102	64	16	0.906	22	0.568	50	1	5	1	10	4.5	0.421	0	48.659	11	71.8	NaN	NaN	23.05	23.008	NaN
920	2009	11	7	4	0	0	734084	16.5	150	114	22	0.727	14	0.929	40	1	5	1	9	5	0.6	1	50.573	17	77.8	NaN	NaN	23.15	23.059	NaN
921	2009	11	7	4	3	10	734084	16	162	126	16	0.875	20	0.625	92	1	15	1	26.5	6.5	0.496	1	50.512	17	72.3	NaN	NaN	23.1	23.078	3
922	2009	11	7	4	7	24	734084	23.5	174	136	18	1.222	20	1.175	56	1	11	1	32.5	9.5	0.591	0	49.775	27	78.5	NaN	NaN	23.15	23.027	1
923	2009	11	7	4	11	14	734084	23.5	188	150	20	0.925	18	1.278	56	1	11	1	27.5	9.5	0.615	1	50.615	25	73.5	NaN	NaN	23.15	22.967	3
924	2009	11	7	4	15	18	734084	18.5	112	86	18	0.889	8	1.875	96	1	5	1	13	4.5	0.413	0	53.67	13	79.8	NaN	NaN	23.15	22.948	3
925	2009	11	7	4	18	46	734084	20.5	128	84	20	0.9	24	0.854	48	1	7	1	17.5	6.5	0.477	0	54.634	19	64.8	NaN	NaN	23.15	22.952	10
926	2009	11	7	4	21	42	734084	20.5	166	128	18	1.111	20	0.85	38	1	11	1	13	4.5	0.627	1	54.85	31	71	NaN	NaN	23.15	22.952	1
927	2009	11	7	4	25	6	734084	22.5	32	4	18	1.167	10	2.15	42	1	1	1	2.5	1.5	0.054	1	53.583	1	80.3	NaN	NaN	23.15	22.65	5
928	2009	11	7	4	26	20	734084	280.5	298	4	90	3.044	204	1.368	182	1	1	1	8	6.5	0.008	0	37.333	1	64.5	NaN	NaN	23.15	12.65	8
929	2009	11	7	4	34	20	734084	24.5	130	86	20	1.075	24	0.938	56	1	7	1	11	3.5	0.462	0	55.494	19	79.8	NaN	NaN	23.1	22.719	13
930	2009	11	7	4	37	26	734084	25	202	156	26	0.904	20	1.225	72	1	15	1	28	7	0.569	1	55.418	31	86.5	NaN	NaN	23.1	22.616	5
931	2009	11	7	4	42	0	734084	31	168	108	26	0.981	34	0.912	50	1	7	1	19.5	9.5	0.495	0	55.759	19	88	NaN	NaN	23.1	22.038	11
932	2009	11	7	4	45	38	734084	34	180	122	26	0.962	32	0.75	40	1	11	1	34	13	0.555	1	55.423	13	83.8	NaN	NaN	23.05	22.096	3
933	2009	11	7	4	49	18	734084	72.5	208	4	138	0.511	66	1.053	74	7	1	1	5	3	0.014	0	44.75	1	78.8	NaN	NaN	23	16.3	8
934	2009	11	7	4	54	0	734084	22	200	158	18	1.139	24	0.771	46	1	11	1	12	4	0.642	0	61.097	29	87.8	NaN	NaN	22.9	22.334	8
935	2009	11	7	4	58	6	734084	27.5	202	138	34	0.662	30	0.717	58	1	5	1	16	6	0.531	0	59.864	27	84	NaN	NaN	22.9	22.185	7
936	2009	11	7	5	2	26	734084	27.5	192	130	34	0.618	28	0.75	52	1	9	1	20	6.5	0.533	1	60.364	13	82.3	NaN	NaN	22.9	22.324	11
937	2009	11	7	5	6	30	734084	48.5	190	104	74	0.655	12	3.083	12	1	5	1	48.5	20.5	0.515	0	52.557	11	82.5	NaN	NaN	22.85	21.883	0
938	2009	11	7	5	9	52	734084	56	70	2	28	2	40	1.388	114	1	1	1	0.5	0.5	0.011	0	51	1	71.3	NaN	NaN	22.95	19.775	3
939	2009	11	7	5	12	56	734084	50.5	238	4	196	0.247	38	1.263	72	11	1	1	4.5	2.5	0.013	1	48.167	1	94.8	NaN	NaN	22.85	16.733	2
940	2009	11	7	5	18	6	734084	40.5	70	12	42	0.726	16	2.531	16	3	3	1	11	10.5	0.14	0	55.643	1	92.5	NaN	NaN	22.8	22.307	0
941	2009	11	7	5	19	32	734084	258	272	2	78	3.308	192	1.344	204	1	1	1	0	0	0.004	0	39.25	1	76.3	NaN	NaN	22.75	13.05	6
942	2009	11	7	5	27	28	734084	33	148	66	34	0.882	48	0.635	70	1	5	1	8.5	3	0.303	0	60.618	7	83	NaN	NaN	22.75	22.347	3
943	2009	11	7	5	31	6	734084	35	172	96	32	1.094	44	0.636	94	1	13	1	14	7	0.361	1	60.908	17	82.3	NaN	NaN	22.7	22.247	14
944	2009	11	7	5	35	32	734084	41.5	170	72	34	0.897	64	0.648	66	1	5	1	17	13	0.305	0	58.304	11	88.5	NaN	NaN	22.95	21.98	1
945	2009	11	7	5	39	28	734084	41.5	176	88	34	0.897	54	0.546	68	1	3	1	24	12	0.361	1	59.561	15	94	NaN	NaN	22.95	21.903	5
946	2009	11	7	5	43	32	734084	30.5	220	146	32	0.859	42	0.631	88	1	21	1	21	4	0.474	0	62.443	23	91	NaN	NaN	22.95	22.249	0
947	2009	11	7	5	48	40	734084	30	192	130	30	0.867	32	0.656	542	1	11	1	20	9	0.177	1	64.72	25	84.5	NaN	NaN	23.1	22.211	1
948	2009	11	7	6	0	54	734084	44	218	16	182	0.19	20	2.2	22	3	1	1	9.5	9.5	0.067	0	56.444	1	84	NaN	NaN	23.1	21.094	1
949	2009	11	7	6	4	54	734084	7.5	18	8	4	1.875	6	1.25	12	1	3	1	7	3.5	0.267	0	67.55	3	85.8	NaN	NaN	23.1	22.71	3
950	2009	11	7	6	5	24	734084	5	12	0	6	0.833	6	0.833	0	1	1	1	0	0	0	0	71.75	1	84.8	NaN	NaN	23.15	22.9	1
951	2009	11	7	6	5	36	734084	185.5	208	4	80	2.306	124	1.48	312	1	1	1	3	2	0.008	0	39.25	1	85.5	NaN	NaN	23.1	13.7	2
952	2009	11	7	6	14	16	734084	29.5	128	46	32	0.844	50	0.43	414	1	1	1	10.5	8	0.085	0	67.458	11	91	NaN	NaN	23.15	22.127	0
953	2009	11	7	6	23	18	734084	37.5	164	50	44	0.602	70	0.493	4900	1	5	1	17	11.5	0.01	0	63.865	9	86.8	NaN	NaN	23.15	21.256	1
954	2009	11	7	7	47	42	734084	13	128	84	26	0.462	18	0.583	58	1	9	1	9.5	2.5	0.452	0	76.366	33	96.3	NaN	NaN	21.55	21.184	NaN
955	2009	11	7	7	50	48	734084	6.5	170	78	8	0.75	84	0.06	NaN	1	7	5	5	2	NaN	0	81.431	25	97.5	NaN	NaN	21.25	21.156	NaN
							AVG	147.153	4.5652	1.33235	1.4602	1.29163	1.77264	1.09568	9.86271		6.04612					0.4377
							SD	134.153	2.72912	0.947159	0.981166	0.72881	1.31161	0.545236	68.0325		0.0808027
								429.5	11.1333	4.76667
							SUM		72.5867

## Sheet: SCF03_iknos_DiveStat
DiveNumber	Year	Month	Day	Hour	Min	Sec	JulDate	Maxdepth	Dduration	Botttime	DescTime	DescRate	AscTime	AscRate	PDI	DWigglesDesc	DWigglesBott	DWigglesAsc	TotVertDistBot	BottRange	Efficiency	IDZ
1	2009	10	30	10	50	20	734076	5.5	70	50	10	0.4	10	0.4	190	1	5	1	7	1.5	0.192	0
2	2009	10	30	10	54	40	734076	5.5	118	12	78	0.071	28	0.196	130	7	3	1	2	1	0.048	1
3	2009	10	30	10	58	48	734076	47.5	172	16	106	0.42	50	0.95	2454	1	1	1	3	3	0.006	0
4	2009	10	30	11	42	34	734076	9.5	124	44	22	0.409	58	0.121	354	1	1	3	3	2.5	0.092	0
5	2009	10	30	11	50	32	734076	5.5	52	28	12	0.333	12	0.417	278	1	1	1	2	1.5	0.085	0
6	2009	10	30	11	56	2	734076	19.5	140	72	28	0.661	40	0.362	116	1	5	1	8	5	0.281	0
7	2009	10	30	12	0	18	734077	8	128	68	22	0.318	38	0.158	228	1	5	5	5	2	0.191	0
8	2009	10	30	12	6	14	734077	17.5	136	60	48	0.281	28	0.5	288	1	5	1	11.5	5	0.142	0
9	2009	10	30	12	13	18	734077	29	176	82	54	0.389	40	0.575	86	1	3	1	15	8	0.313	0
10	2009	10	30	12	17	40	734077	5.5	36	12	14	0.357	10	0.55	108	1	1	1	0.5	0.5	0.083	0
11	2009	10	30	12	20	4	734077	383	408	2	180	2.125	226	1.695	1124	1	1	1	0.5	0.5	0.001	0
12	2009	10	30	12	45	36	734077	11	98	44	20	0.4	34	0.265	202	1	5	1	8	4	0.147	0
13	2009	10	30	12	50	36	734077	12	108	62	18	0.611	28	0.304	168	1	3	1	6.5	3.5	0.225	1
14	2009	10	30	12	55	12	734077	13.5	100	30	24	0.417	46	0.207	58	1	1	1	7.5	4	0.19	0
15	2009	10	30	12	57	50	734077	41.5	144	18	52	0.798	74	0.52	188	1	1	1	3	3	0.054	0
16	2009	10	30	13	3	22	734077	8	60	24	14	0.5	22	0.318	108	1	3	1	3	1	0.143	0
17	2009	10	30	13	6	10	734077	28.5	150	46	42	0.619	62	0.371	180	1	3	3	9	5.5	0.139	0
18	2009	10	30	13	11	40	734077	11	94	42	16	0.531	36	0.25	60	1	3	1	6.5	2.5	0.273	0
19	2009	10	30	13	14	14	734077	19	108	40	30	0.517	38	0.434	100	1	1	1	6	3.5	0.192	0
20	2009	10	30	13	17	42	734077	17	98	20	34	0.471	44	0.341	186	1	1	1	3	2	0.07	0
21	2009	10	30	13	22	26	734077	20	120	56	30	0.5	34	0.426	290	1	1	1	10.5	5.5	0.137	0
22	2009	10	30	13	29	16	734077	19.5	160	80	24	0.688	56	0.25	394	1	3	3	16.5	9	0.144	1
23	2009	10	30	13	38	30	734077	9	68	30	18	0.5	20	0.325	42	1	3	3	3.5	2.5	0.273	0
24	2009	10	30	13	40	20	734077	9	48	14	18	0.5	16	0.438	98	1	1	1	2	2	0.096	1
25	2009	10	30	13	42	46	734077	5.5	52	28	14	0.357	10	0.55	30	1	3	1	1.5	1	0.341	0
26	2009	10	30	13	44	8	734077	10.5	82	34	24	0.438	24	0.354	114	3	3	1	3	2	0.173	0
27	2009	10	30	13	47	24	734077	511.5	630	138	250	2.036	242	2.112	572	1	5	1	5	2.5	0.115	0
28	2009	10	30	14	7	26	734077	493.5	554	82	238	2.063	234	2.109	402	1	5	1	5.5	2.5	0.086	1
29	2009	10	30	14	23	22	734077	7	52	18	14	0.5	20	0.275	324	1	1	1	1.5	1.5	0.048	0
30	2009	10	30	14	29	38	734077	7.5	64	16	12	0.542	36	0.181	62	1	1	5	2	1	0.127	1
31	2009	10	30	14	31	44	734077	7	54	10	22	0.318	22	0.318	36	1	1	1	0	0	0.111	1
32	2009	10	30	14	33	14	734077	7	34	4	16	0.438	14	0.5	78	1	1	1	0	0	0.036	1
33	2009	10	30	14	35	6	734077	5.5	62	2	32	0.172	28	0.196	0	3	1	3	0	0	0.032	0
34	2009	10	30	14	36	8	734077	5.5	20	4	8	0.5	8	0.5	22	1	1	1	3	1.5	0.095	1
35	2009	10	30	14	36	50	734077	5	54	14	30	0.167	10	0.5	154	3	1	1	0	0	0.067	1
36	2009	10	30	14	40	18	734077	481	596	118	236	2.017	242	1.988	484	1	7	1	8	5	0.109	0
37	2009	10	30	14	58	18	734077	10	54	20	16	0.531	18	0.5	54	1	1	1	2.5	1.5	0.185	0
38	2009	10	30	15	0	6	734077	7.5	30	4	16	0.469	10	0.75	52	1	1	1	0	0	0.049	0
39	2009	10	30	15	1	28	734077	478.5	610	142	236	2.011	232	2.06	262	3	11	1	11.5	5	0.163	0
40	2009	10	30	15	16	0	734077	5	28	4	14	0.286	10	0.4	234	1	1	1	2	1	0.015	0
41	2009	10	30	15	20	22	734077	479.5	646	166	172	1.953	308	1.557	366	1	3	13	148.5	146	0.164	0
42	2009	10	30	15	37	14	734077	6.5	38	6	18	0.361	14	0.393	268	1	1	1	1	1	0.02	0
43	2009	10	30	15	42	20	734077	10	64	4	18	0.5	42	0.226	58	1	1	5	1.5	1	0.033	0
44	2009	10	30	15	44	22	734077	486.5	624	84	222	2.18	318	1.528	1016	1	3	9	4	3	0.051	0
45	2009	10	30	16	11	42	734077	6	22	2	10	0.6	10	0.6	2	1	1	1	0	0	0.083	0
46	2009	10	30	16	12	6	734077	6.5	36	8	16	0.406	12	0.5	178	1	1	1	0.5	0.5	0.037	1
47	2009	10	30	16	15	40	734077	529.5	642	82	254	2.069	306	1.729	1146	1	3	11	5.5	4	0.046	0
48	2009	10	30	16	45	28	734077	8	74	24	22	0.295	28	0.232	136	1	1	5	3	1.5	0.114	0
49	2009	10	30	16	48	58	734077	548	714	118	254	2.146	342	1.601	2054	1	3	7	5.5	3	0.043	0
50	2009	10	30	17	35	6	734077	411.5	666	230	200	2.053	236	1.699	834	1	21	9	40	15.5	0.153	0
51	2009	10	30	18	0	6	734077	403.5	566	170	200	1.998	196	2.059	1366	1	9	1	8	4	0.088	1
52	2009	10	30	18	32	18	734077	395.5	514	90	204	1.936	220	1.777	420	1	13	9	16	6	0.096	1
53	2009	10	30	18	47	52	734077	393.5	466	42	212	1.851	212	1.851	198	1	3	5	4	2	0.063	1
54	2009	10	30	18	58	56	734077	404.5	512	92	188	2.114	232	1.741	348	1	5	5	11.5	7	0.107	1
55	2009	10	30	19	13	16	734077	397.5	452	82	174	2.259	196	2.028	260	1	1	1	4.5	4.5	0.115	1
56	2009	10	30	19	25	8	734077	391	432	58	184	2.117	190	2.055	226	1	7	1	5	1.5	0.088	1
57	2009	10	30	19	36	6	734077	400.5	508	114	198	1.99	196	2.041	212	1	7	3	15	9.5	0.158	1
58	2009	10	30	19	48	6	734077	406	444	64	174	2.293	206	1.968	242	1	3	3	8.5	7	0.093	1
59	2009	10	30	19	59	32	734077	401.5	498	94	204	1.958	200	1.998	226	1	3	1	6	2.5	0.13	1
60	2009	10	30	20	11	36	734077	404	522	78	196	2.038	248	1.629	268	1	3	9	5.5	4.5	0.099	1
61	2009	10	30	20	24	46	734077	402.5	490	44	196	2.046	250	1.598	258	1	3	15	5.5	3.5	0.059	1
62	2009	10	30	20	37	14	734077	392	482	86	196	2	200	1.958	402	1	11	1	37.5	14.5	0.097	1
63	2009	10	30	20	51	58	734077	393.5	484	106	178	2.177	200	1.968	366	1	7	1	11	6	0.125	1
64	2009	10	30	21	6	8	734077	395	528	88	190	2.058	250	1.574	290	1	9	7	10.5	4	0.108	1
65	2009	10	30	21	19	46	734077	393.5	542	78	190	2.047	274	1.432	352	1	9	7	9.5	4.5	0.087	1
66	2009	10	30	21	34	40	734077	397.5	524	74	202	1.946	248	1.601	7098	1	1	9	5	4.5	0.01	1
67	2009	10	30	23	41	42	734077	37	102	2	48	0.771	52	0.712	244	1	1	3	0	0	0.006	0
68	2009	10	30	23	47	28	734077	50.5	176	6	108	0.458	62	0.815	622	5	1	1	1	1	0.008	0
69	2009	10	31	0	0	46	734077	413	492	78	200	2.063	214	1.921	514	1	3	1	5.5	2.5	0.078	0
70	2009	10	31	0	17	32	734077	436	554	114	220	1.961	220	1.982	726	1	5	1	7.5	4.5	0.089	1
71	2009	10	31	0	38	52	734077	11	18	0	12	0.917	6	1.833	170	1	1	1	0	0	0	0
72	2009	10	31	0	42	0	734077	8	28	4	6	1.167	18	0.389	604	1	1	1	2	1	0.006	0
73	2009	10	31	0	52	32	734077	408	486	94	178	2.281	214	1.904	2986	1	7	3	5.5	2	0.027	0
74	2009	10	31	1	50	24	734077	464	636	178	222	2.068	236	1.96	412	1	3	1	7.5	5	0.17	0
75	2009	10	31	2	7	52	734077	463	660	210	212	2.156	238	1.937	960	1	15	1	15	6	0.13	1
76	2009	10	31	2	34	52	734077	446.5	620	194	204	2.15	222	2.011	766	1	1	1	8	8	0.14	1
77	2009	10	31	2	57	58	734077	7	30	2	12	0.583	16	0.438	3274	1	1	1	0	0	0.001	0
78	2009	10	31	3	53	2	734077	436.5	622	202	202	2.156	218	1.993	396	1	9	1	8	2.5	0.198	0
79	2009	10	31	4	10	0	734077	445	686	246	206	2.131	234	1.895	512	1	11	3	13.5	6	0.205	1
80	2009	10	31	4	29	58	734077	458	652	210	208	2.173	234	1.955	1172	1	7	1	13.5	6	0.115	1
81	2009	10	31	5	0	22	734077	461.5	592	146	210	2.186	236	1.956	992	1	7	1	8.5	2.5	0.092	1
82	2009	10	31	5	26	46	734077	5.5	84	24	12	0.333	48	0.115	788	1	3	5	4.5	3	0.028	0
83	2009	10	31	5	41	18	734077	5	36	12	14	0.357	10	0.5	1506	1	1	1	0	0	0.008	1
84	2009	10	31	6	6	60	734077	392.5	450	80	180	2.167	190	2.066	280	1	5	1	4.5	2.5	0.11	0
85	2009	10	31	6	19	10	734077	397	516	94	214	1.839	208	1.909	444	1	3	1	4.5	3.5	0.098	1
86	2009	10	31	6	35	10	734077	399.5	524	150	180	2.169	194	2.054	134	1	3	1	11	9	0.228	1
87	2009	10	31	6	46	8	734077	397.5	446	88	166	2.383	192	2.068	224	1	9	1	6.5	2.5	0.131	1
88	2009	10	31	6	57	18	734077	392.5	500	106	188	2.061	206	1.903	208	1	13	1	14.5	5	0.15	1
89	2009	10	31	7	9	6	734077	387.5	476	110	178	2.169	188	2.061	230	1	11	1	12.5	2.5	0.156	1
90	2009	10	31	7	20	52	734077	391	464	100	178	2.163	186	2.089	212	1	7	1	19.5	6	0.148	1
91	2009	10	31	7	32	8	734077	391	588	210	174	2.193	204	1.917	290	1	17	1	24.5	9.5	0.239	1
92	2009	10	31	7	46	46	734077	395.5	442	66	190	2.066	186	2.126	316	1	7	1	10	4	0.087	1
93	2009	10	31	7	59	24	734077	403	550	150	192	2.091	208	1.925	256	1	9	1	10	2.5	0.186	1
94	2009	10	31	8	12	50	734077	399.5	498	86	190	2.082	222	1.788	252	1	15	1	19.5	4	0.115	1
95	2009	10	31	8	25	20	734077	397.5	504	90	194	2.034	220	1.807	330	1	9	1	10	3	0.108	1
96	2009	10	31	8	39	14	734077	394	500	118	180	2.153	202	1.948	314	1	9	1	13	6.5	0.145	1
97	2009	10	31	8	52	48	734077	391.5	506	122	174	2.218	210	1.862	282	1	7	3	10	5.5	0.155	1
98	2009	10	31	9	5	56	734077	396	468	66	190	2.053	212	1.866	348	1	7	1	12.5	6	0.081	1
99	2009	10	31	9	19	32	734077	389	508	138	176	2.193	194	2.005	270	1	11	1	21	6.5	0.177	1
100	2009	10	31	9	32	30	734077	390.5	506	130	180	2.15	196	1.985	338	1	13	3	16	4.5	0.154	1
101	2009	10	31	9	46	34	734077	389.5	434	52	192	1.979	190	2.047	416	1	1	1	10	9.5	0.061	1
102	2009	10	31	10	0	44	734077	388.5	520	118	194	1.985	208	1.868	1358	1	19	1	19.5	4	0.063	1
103	2009	10	31	10	32	2	734077	399	538	118	216	1.847	204	1.956	428	1	13	1	18	5.5	0.122	1
104	2009	10	31	10	48	8	734077	403	568	134	216	1.838	218	1.849	534	1	13	1	26	6	0.122	1
105	2009	10	31	11	6	30	734077	204.5	310	14	124	1.645	172	1.189	1544	1	3	5	6.5	3.5	0.008	0
106	2009	10	31	11	37	24	734077	392	550	90	188	2.069	272	1.441	300	1	11	5	13	3	0.106	0
107	2009	10	31	11	51	34	734077	391	474	44	198	1.967	232	1.659	304	1	3	1	13.5	6	0.057	1
108	2009	10	31	12	4	32	734078	392	576	86	200	1.95	290	1.352	242	1	9	1	7	2.5	0.105	1
109	2009	10	31	12	18	10	734078	393.5	502	110	192	2.034	200	1.968	256	1	1	1	3	3	0.145	1
110	2009	10	31	12	30	48	734078	394.5	496	110	192	2.039	194	2.034	250	1	7	1	6	3	0.147	1
111	2009	10	31	12	43	14	734078	394.5	488	98	194	2.018	196	2.013	282	1	7	1	9	4	0.127	1
112	2009	10	31	12	56	4	734078	395	580	110	198	1.99	272	1.452	170	1	13	9	7	1.5	0.147	1
113	2009	10	31	13	8	34	734078	392.5	468	82	190	2.055	196	2.003	320	1	3	1	3	2	0.104	1
114	2009	10	31	13	21	42	734078	392	464	62	196	1.985	206	1.9	8184	1	3	1	5.5	3	0.007	1
115	2009	10	31	15	45	50	734078	482.5	592	150	218	2.186	224	2.141	1036	1	5	1	13	6	0.092	0
116	2009	10	31	16	12	58	734078	394.5	552	146	210	1.869	196	2.005	272	1	7	3	6.5	2	0.177	0
117	2009	10	31	16	26	42	734078	421.5	524	82	240	1.719	202	2.087	506	1	5	1	11	9	0.08	1
118	2009	10	31	16	43	52	734078	416.5	442	26	218	1.911	198	2.104	312	1	5	1	2	0.5	0.034	1
119	2009	10	31	16	56	26	734078	428.5	526	64	216	1.958	246	1.732	240	1	5	7	10	5.5	0.084	1
120	2009	10	31	17	9	12	734078	452	558	68	226	1.969	264	1.71	250	1	7	7	10.5	7	0.084	1
121	2009	10	31	17	22	40	734078	443	564	68	242	1.831	254	1.74	294	1	9	3	6	1.5	0.079	1
122	2009	10	31	17	36	58	734078	446	576	90	214	2.079	272	1.638	208	1	3	7	4	1	0.115	1
123	2009	10	31	17	50	2	734078	436.5	656	34	234	1.857	388	1.122	130	1	1	21	3	2	0.043	1
124	2009	10	31	18	3	8	734078	445	596	70	238	1.84	288	1.545	200	1	5	11	9	7	0.088	1
125	2009	10	31	18	16	24	734078	447	588	72	240	1.848	276	1.62	228	1	3	9	5.5	3.5	0.088	1
126	2009	10	31	18	30	0	734078	450.5	572	38	236	1.898	298	1.512	256	1	3	13	4.5	2.5	0.046	1
127	2009	10	31	18	43	48	734078	460	594	44	222	2.056	328	1.402	270	1	1	25	3.5	3.5	0.051	1
128	2009	10	31	18	58	12	734078	455	600	54	202	2.228	344	1.321	306	1	3	7	6.5	5	0.06	1
129	2009	10	31	19	13	18	734078	449	546	38	224	2.002	284	1.581	524	1	5	7	3.5	1	0.036	1
130	2009	10	31	19	31	8	734078	436.5	596	50	218	1.993	328	1.331	398	1	7	15	7	3.5	0.05	1
131	2009	10	31	19	47	42	734078	440	518	70	208	2.094	240	1.833	484	1	3	1	5.5	4.5	0.07	1
132	2009	10	31	20	4	24	734078	433	486	60	200	2.155	226	1.916	1468	1	3	1	5	3.5	0.031	1
133	2009	10	31	20	36	58	734078	80.5	146	4	52	1.5	90	0.861	200	1	1	7	5.5	3	0.012	0
134	2009	10	31	20	42	44	734078	378.5	522	86	202	1.856	234	1.618	198	1	9	7	47.5	21	0.119	0
135	2009	10	31	20	54	44	734078	389.5	518	108	212	1.821	198	1.523	258	1	9	9	99.5	89	0.139	1
136	2009	10	31	21	7	40	734078	386	576	146	220	1.739	210	1.324	178	1	11	9	121.5	112	0.194	1
137	2009	10	31	21	20	14	734078	392.5	524	76	206	1.903	242	1.62	204	1	9	11	12	2.5	0.104	1
138	2009	10	31	21	32	22	734078	381	596	150	196	1.913	250	1.522	258	1	15	9	17.5	6	0.176	1
139	2009	10	31	21	46	36	734078	373.5	562	110	190	1.961	262	1.414	126	1	15	9	16	5	0.16	1
140	2009	10	31	21	58	4	734078	375	550	92	222	1.653	236	1.587	204	1	5	5	11.5	8	0.122	1
141	2009	10	31	22	10	38	734078	377.5	536	126	180	2.067	230	1.346	26532	1	13	9	131.5	78	0.005	1
142	2009	11	1	5	41	46	734078	5	92	58	20	0.175	14	0.25	34	3	5	1	7	3	0.46	0
143	2009	11	1	5	43	52	734078	29.5	114	2	70	0.421	42	0.702	82	1	1	1	0	0	0.01	0
144	2009	11	1	5	47	8	734078	9	112	52	34	0.191	26	0.25	122	3	3	1	8	4	0.222	0
145	2009	11	1	5	51	2	734078	15	80	36	16	0.781	28	0.464	88	1	3	1	5.5	2.5	0.214	0
146	2009	11	1	5	53	50	734078	30	138	28	68	0.309	42	0.631	174	3	1	1	12.5	9	0.09	0
147	2009	11	1	5	59	2	734078	11	78	20	22	0.5	36	0.25	112	1	1	1	2	2	0.105	0
148	2009	11	1	6	2	12	734078	10	70	12	24	0.417	34	0.235	26	1	1	3	2	2	0.125	1
149	2009	11	1	6	3	48	734078	13	106	18	52	0.25	36	0.347	52	1	3	1	2.5	1.5	0.114	0
150	2009	11	1	6	6	26	734078	13.5	120	60	40	0.3	20	0.5	930	1	3	3	7	3.5	0.057	1
151	2009	11	1	6	23	56	734078	450.5	594	122	228	1.963	244	1.846	1652	1	9	1	8	3	0.054	0
152	2009	11	1	7	1	22	734078	13	84	18	40	0.325	26	0.365	168	1	1	3	3.5	3.5	0.071	0
153	2009	11	1	7	5	34	734078	423.5	658	218	212	1.948	228	1.84	314	1	7	1	18.5	10.5	0.224	0
154	2009	11	1	7	21	46	734078	482.5	744	274	220	1.959	250	1.926	460	1	3	1	53.5	51.5	0.228	0
155	2009	11	1	7	41	50	734078	433	716	274	210	2.019	232	1.853	740	1	7	3	16.5	9	0.188	0
156	2009	11	1	8	6	6	734078	434.5	680	230	216	1.979	234	1.857	866	1	9	1	11	7	0.149	1
157	2009	11	1	8	31	52	734078	5.5	44	12	12	0.375	20	0.275	1702	1	1	1	1	1	0.007	0
158	2009	11	1	9	0	58	734078	8	84	40	24	0.333	20	0.325	610	1	5	1	5.5	3	0.058	0
159	2009	11	1	9	12	32	734078	10.5	96	18	46	0.228	32	0.266	260	1	3	5	4	3	0.051	0
160	2009	11	1	9	18	28	734078	9	26	2	14	0.643	10	0.9	846	1	1	1	0	0	0.002	0
161	2009	11	1	9	33	0	734078	417	514	106	206	2	202	2.057	232	1	7	1	13.5	5	0.142	0
162	2009	11	1	9	45	26	734078	418	512	98	192	2.167	222	1.883	200	1	9	1	9	2.5	0.138	1
163	2009	11	1	9	57	18	734078	419	480	102	190	2.2	188	2.218	208	1	5	1	6	2	0.148	1
164	2009	11	1	10	8	46	734078	420	526	126	188	2.226	212	1.981	214	1	9	3	7	2.5	0.17	1
165	2009	11	1	10	21	6	734078	421.5	530	130	192	2.188	208	2.019	260	1	5	1	5	1.5	0.165	1
166	2009	11	1	10	34	16	734078	419.5	428	48	190	2.2	190	2.205	296	1	7	1	7	2.5	0.066	1
167	2009	11	1	10	46	20	734078	412.5	466	70	204	2.02	192	2.146	296	1	11	1	6	1	0.092	1
168	2009	11	1	10	59	2	734078	405.5	472	98	188	2.152	186	2.18	286	1	9	1	18	4	0.129	1
169	2009	11	1	11	11	40	734078	406	528	142	190	2.118	196	2.069	198	1	13	1	21	4.5	0.196	1
170	2009	11	1	11	23	46	734078	406.5	478	106	178	2.27	194	2.095	164	1	11	1	13.5	3	0.165	1
171	2009	11	1	11	34	28	734078	408.5	464	104	172	2.363	188	2.173	160	1	11	1	15	3	0.167	1
172	2009	11	1	11	44	52	734078	412.5	456	100	168	2.426	188	2.186	156	1	5	1	9.5	5	0.163	1
173	2009	11	1	11	55	4	734078	412	492	118	176	2.324	198	2.076	180	1	5	1	7	3	0.176	1
174	2009	11	1	12	6	16	734079	409.5	478	106	174	2.339	198	2.066	176	1	11	1	15	2.5	0.162	1
175	2009	11	1	12	17	10	734079	411.5	488	106	174	2.365	208	1.964	210	1	5	1	10	5.5	0.152	1
176	2009	11	1	12	28	48	734079	409	488	106	176	2.321	206	1.983	176	1	13	1	11	1.5	0.16	1
177	2009	11	1	12	39	52	734079	412	484	98	180	2.289	206	1.985	222	1	13	1	13	4.5	0.139	1
178	2009	11	1	12	51	38	734079	409	484	98	184	2.22	202	2.015	240	1	9	1	12.5	4	0.135	1
179	2009	11	1	13	3	42	734079	408	516	126	188	2.17	202	2.012	208	1	13	1	10.5	3	0.174	1
180	2009	11	1	13	15	46	734079	408	464	82	190	2.137	192	2.125	190	1	7	1	6	2	0.125	1
181	2009	11	1	13	26	40	734079	412.5	494	98	192	2.143	204	2.02	212	1	5	1	7.5	3.5	0.139	1
182	2009	11	1	13	38	26	734079	420	508	118	194	2.162	196	2.102	278	1	9	1	15	8.5	0.15	1
183	2009	11	1	13	51	32	734079	405	478	78	196	2.066	204	1.985	328	1	17	1	18	2	0.097	1
184	2009	11	1	14	4	58	734079	396.5	490	84	200	1.975	206	1.888	262	1	9	3	33	9.5	0.112	1
186	2009	11	1	14	31	12	734079	406	614	126	214	1.871	274	1.482	174	1	13	5	12.5	5.5	0.16	1
187	2009	11	1	14	44	20	734079	402	624	170	194	1.992	260	1.546	206	1	11	9	20	15	0.205	1
188	2009	11	1	14	58	10	734079	413	574	122	200	2.043	252	1.639	368	1	9	5	11	4	0.13	1
189	2009	11	1	15	13	52	734079	420.5	568	134	214	1.949	220	1.909	354	3	7	1	7	3.5	0.145	1
190	2009	11	1	15	29	14	734079	5	70	20	16	0.313	34	0.103	348	1	3	1	3.5	1.5	0.048	0
191	2009	11	1	15	36	12	734079	445.5	590	138	200	2.16	252	1.768	210	1	3	1	14	13	0.172	0
192	2009	11	1	15	49	32	734079	454	622	118	206	2.153	298	1.523	194	1	5	9	14	10	0.145	1
193	2009	11	1	16	3	8	734079	453	600	78	208	2.125	314	1.443	158	1	7	11	14	11	0.103	1
194	2009	11	1	16	15	46	734079	425.5	600	114	220	1.934	266	1.573	122	1	7	9	13	7.5	0.158	1
195	2009	11	1	16	27	48	734079	418.5	574	106	226	1.841	242	1.723	184	1	15	3	17	3	0.14	1
197	2009	11	1	17	12	10	734079	405	480	36	192	2.102	252	1.607	160	1	5	15	3.5	1.5	0.056	1
198	2009	11	1	17	22	50	734079	5	72	14	14	0.357	44	0.091	36	1	3	5	2	1.5	0.13	0
199	2009	11	1	17	24	38	734079	5	56	26	10	0.35	20	0.25	94	1	3	1	3.5	1.5	0.173	1
200	2009	11	1	17	27	8	734079	405.5	512	110	210	1.876	192	2.109	148	1	9	1	16	11.5	0.167	0
201	2009	11	1	17	38	8	734079	408	586	214	180	2.247	192	2.125	2698	1	5	1	5.5	3.5	0.065	1
202	2009	11	1	18	32	52	734079	409.5	504	56	226	1.812	222	1.813	716	1	5	3	11	7.5	0.046	1
205	2009	11	1	19	24	44	734079	436.5	570	130	208	2.058	232	1.875	366	1	17	1	19	9	0.139	0
206	2009	11	1	19	40	20	734079	428.5	476	72	204	2.1	200	2.13	186	1	5	1	6.5	3	0.109	1
207	2009	11	1	19	51	22	734079	465	606	134	244	1.871	228	1.921	250	1	15	1	57.5	28.5	0.157	1
208	2009	11	1	20	5	38	734079	488	572	90	236	2.055	246	1.98	374	1	5	1	7	3	0.095	1
209	2009	11	1	20	21	24	734079	474.5	576	86	248	1.899	242	1.961	398	1	11	1	10.5	3.5	0.088	1
210	2009	11	1	20	37	38	734079	475.5	660	118	228	2.057	314	1.508	256	1	5	5	11	6.5	0.129	1
211	2009	11	1	20	52	54	734079	456.5	572	78	238	1.914	256	1.781	286	1	5	3	4.5	1.5	0.091	1
212	2009	11	1	21	7	12	734079	396.5	566	102	204	1.897	260	1.523	216	1	9	5	19	9.5	0.13	0
213	2009	11	1	21	20	14	734079	420	508	36	218	1.878	254	1.654	228	1	1	7	10.5	10.5	0.049	1
214	2009	11	1	21	32	30	734079	406	602	98	226	1.783	278	1.455	226	1	7	7	11	3	0.118	1
215	2009	11	1	21	46	18	734079	471.5	542	46	254	1.852	242	1.948	338	1	3	1	5	2.5	0.052	0
216	2009	11	1	22	0	58	734079	396.5	570	84	212	1.847	274	1.445	166	1	9	5	15.5	5	0.114	0
217	2009	11	1	22	13	14	734079	412	572	98	212	1.903	262	1.569	234	1	11	7	14.5	8.5	0.122	1
218	2009	11	1	22	26	40	734079	432	538	106	214	1.977	218	1.979	292	1	5	1	12.5	9	0.128	1
219	2009	11	1	22	40	30	734079	446.5	642	74	238	1.853	330	1.353	302	1	9	9	9.5	5.5	0.078	1
220	2009	11	1	22	56	14	734079	458.5	686	130	212	2.099	344	1.333	6672	1	5	19	15.5	13.5	0.018	1
221	2009	11	2	0	58	52	734079	8	70	14	22	0.364	34	0.176	90	1	1	3	2	2	0.087	0
222	2009	11	2	1	1	32	734079	9.5	102	46	34	0.25	22	0.318	94	1	1	1	3.5	2.5	0.235	0
223	2009	11	2	1	4	48	734079	10.5	72	34	20	0.375	18	0.417	122	1	1	1	6	3	0.175	0
224	2009	11	2	1	8	2	734079	10	94	22	52	0.144	20	0.5	146	5	1	1	2.5	2.5	0.092	1
225	2009	11	2	1	12	2	734079	14.5	88	4	40	0.362	44	0.318	94	1	1	1	0.5	0.5	0.022	0
226	2009	11	2	1	15	4	734079	13	100	28	52	0.24	20	0.5	144	1	3	1	5.5	4	0.115	0
227	2009	11	2	1	19	8	734079	13.5	110	36	32	0.313	42	0.226	100	1	3	3	8.5	4	0.171	1
228	2009	11	2	1	22	38	734079	32	148	60	58	0.457	30	0.867	130	3	7	1	20.5	7	0.216	0
229	2009	11	2	1	27	16	734079	55.5	172	42	78	0.712	52	0.817	138	1	5	1	17	14.5	0.135	0
230	2009	11	2	1	32	26	734079	40.5	156	2	78	0.519	76	0.533	124	1	1	1	0	0	0.007	0
231	2009	11	2	1	37	6	734079	23	142	26	64	0.359	52	0.337	112	1	3	1	7.5	5.5	0.102	0
232	2009	11	2	1	41	20	734079	12	100	46	20	0.5	34	0.265	126	1	3	1	6	3.5	0.204	0
233	2009	11	2	1	45	6	734079	13.5	112	64	28	0.357	20	0.475	506	1	3	1	11.5	4	0.104	0
234	2009	11	2	1	55	24	734079	424	560	138	206	2.024	216	1.963	222	1	5	1	19	10.5	0.176	0
235	2009	11	2	2	8	26	734079	422.5	544	154	178	2.348	212	1.991	186	1	7	1	17	6.5	0.211	1
236	2009	11	2	2	20	36	734079	423	558	150	174	2.417	234	1.808	184	1	13	1	14.5	3.5	0.202	1
237	2009	11	2	2	32	58	734079	422.5	544	154	180	2.344	210	2.005	180	1	5	1	10	4	0.213	1
238	2009	11	2	2	45	2	734079	425	528	142	178	2.379	208	2.034	172	1	7	1	14.5	6	0.203	1
239	2009	11	2	2	56	42	734079	427.5	538	138	186	2.288	214	1.988	158	1	15	1	20	5.5	0.198	1
240	2009	11	2	3	8	18	734079	429	564	154	178	2.399	232	1.83	218	1	11	1	16.5	5.5	0.197	1
241	2009	11	2	3	21	20	734079	427.5	558	146	190	2.232	222	1.91	164	1	5	1	14	4.5	0.202	1
242	2009	11	2	3	33	22	734079	428.5	512	130	178	2.376	204	2.091	170	1	7	1	12.5	5.5	0.191	1
243	2009	11	2	3	44	44	734079	427.5	522	130	180	2.361	212	2.014	184	1	11	3	11	4	0.184	1
244	2009	11	2	3	56	30	734079	443.5	516	118	186	2.384	212	2.007	178	1	9	1	29	20.5	0.17	1
245	2009	11	2	4	8	4	734079	428	500	110	180	2.353	210	2.017	180	1	3	1	11	4.5	0.162	1
246	2009	11	2	4	19	24	734079	426.5	552	114	172	2.456	266	1.603	194	1	9	3	12	4	0.153	1
247	2009	11	2	4	31	50	734079	429.5	548	138	182	2.341	228	1.871	210	1	11	1	18.5	6	0.182	1
248	2009	11	2	4	44	28	734079	427	496	82	178	2.399	236	1.799	3664	1	7	1	7.5	3.5	0.02	1
249	2009	11	2	5	53	48	734079	5.5	86	18	14	0.357	54	0.083	1716	1	1	3	1.5	1	0.01	0
250	2009	11	2	6	23	50	734079	109.5	190	4	62	1.742	124	0.879	4732	1	1	1	2	1.5	0.001	0
251	2009	11	2	7	45	52	734079	464	526	44	248	1.863	234	1.981	1478	1	1	1	2.5	2	0.022	0
252	2009	11	2	8	19	16	734079	437	530	66	244	1.773	220	1.986	394	1	7	1	7.5	4.5	0.071	1
253	2009	11	2	8	34	40	734079	423	548	110	212	1.939	226	1.872	242	1	15	3	29	12	0.139	1
254	2009	11	2	8	47	50	734079	443.5	504	52	220	1.968	232	1.912	238	1	5	1	14.5	11	0.07	1
255	2009	11	2	9	0	12	734079	432	524	70	230	1.813	224	1.924	594	1	3	1	19	15	0.063	1
256	2009	11	2	9	18	50	734079	458.5	506	40	242	1.88	224	2.047	246	1	7	1	10.5	3.5	0.053	1
257	2009	11	2	9	31	22	734079	459	632	126	264	1.731	242	1.897	2758	1	9	1	11.5	3	0.037	1
258	2009	11	2	10	27	52	734079	420.5	532	66	244	1.717	222	1.89	352	1	5	1	7.5	2	0.075	1
259	2009	11	2	10	42	36	734079	380	540	134	218	1.706	188	2.008	400	1	15	1	30	8	0.143	1
260	2009	11	2	10	58	16	734079	393	492	90	204	1.882	198	1.985	480	1	5	1	12	9	0.093	1
261	2009	11	2	11	14	28	734079	412	504	102	196	2.092	206	1.998	348	1	11	1	16.5	4	0.12	1
262	2009	11	2	11	28	40	734079	430	504	90	202	2.129	212	2.021	166	1	7	1	6.5	2.5	0.134	1
263	2009	11	2	11	39	50	734079	446.5	540	74	240	1.833	226	1.973	290	1	3	1	8	6.5	0.089	1
264	2009	11	2	11	53	40	734079	442	478	24	236	1.869	218	2.025	1724	1	3	1	2.5	1	0.011	1
265	2009	11	2	12	30	22	734080	416	504	82	220	1.886	202	2.045	316	1	9	1	11.5	4	0.1	1
266	2009	11	2	12	44	2	734080	469	546	70	260	1.798	216	1.919	230	1	3	1	61.5	55	0.09	0
267	2009	11	2	12	56	58	734080	393	520	74	244	1.594	202	1.946	234	1	7	1	7.5	3.5	0.098	0
268	2009	11	2	13	9	32	734080	403.5	514	94	212	1.863	208	1.938	226	1	5	1	11	8.5	0.127	1
269	2009	11	2	13	21	52	734080	405.5	468	42	236	1.665	190	2.113	266	1	1	1	16.5	12.5	0.057	1
270	2009	11	2	13	34	6	734080	421.5	538	90	230	1.809	218	1.915	254	1	3	1	13.5	5.5	0.114	1
271	2009	11	2	13	47	18	734080	393	462	32	238	1.626	192	2.039	276	1	1	1	7.5	6	0.043	1
272	2009	11	2	13	59	36	734080	115.5	184	4	96	1.193	84	1.357	46	1	1	1	2.5	1.5	0.017	0
273	2009	11	2	14	3	26	734080	394	574	130	246	1.579	198	1.982	416	1	11	1	14	5.5	0.131	0
274	2009	11	2	14	19	56	734080	374	534	72	234	1.56	228	1.634	432	1	7	5	22.5	9	0.075	1
275	2009	11	2	14	36	2	734080	459	694	222	222	2.027	250	1.782	376	1	7	3	27.5	13.5	0.207	0
276	2009	11	2	14	53	52	734080	415	478	58	214	1.921	206	2.015	248	1	3	1	5	4	0.08	1
277	2009	11	2	15	5	58	734080	415	570	130	236	1.729	204	2.034	196	1	13	1	13.5	6.5	0.17	1
278	2009	11	2	15	18	44	734080	431.5	514	74	218	1.959	222	1.941	176	1	13	3	12	5	0.107	1
279	2009	11	2	15	30	14	734080	441	634	142	212	2.059	280	1.575	190	1	11	1	15	5	0.172	1
280	2009	11	2	15	43	58	734080	444.5	616	106	240	1.831	270	1.641	160	1	9	5	12.5	5	0.137	1
281	2009	11	2	15	56	54	734080	450	568	66	222	1.995	280	1.607	178	1	5	3	9	7.5	0.088	1
282	2009	11	2	16	9	20	734080	471.5	646	122	226	2.053	298	1.582	198	1	7	5	12.5	7.5	0.145	1
283	2009	11	2	16	23	24	734080	459.5	594	62	250	1.824	282	1.629	318	1	5	3	5	3	0.068	1
284	2009	11	2	16	38	36	734080	457.5	680	150	240	1.898	290	1.56	196	3	13	11	15	5	0.171	1
285	2009	11	2	16	53	12	734080	476	622	114	222	2.122	286	1.664	224	1	9	15	9.5	4.5	0.135	1
286	2009	11	2	17	7	18	734080	481.5	606	62	232	2.039	312	1.54	210	1	5	13	11.5	8.5	0.076	1
287	2009	11	2	17	20	54	734080	456	524	74	228	1.991	222	2.052	294	1	5	1	6.5	2	0.09	1
288	2009	11	2	17	34	32	734080	441.5	526	74	228	1.925	224	1.96	266	1	7	3	8	2.5	0.093	1
289	2009	11	2	17	47	44	734080	448	598	74	242	1.849	282	1.587	226	1	1	13	1	0.5	0.09	1
290	2009	11	2	18	1	28	734080	454	606	82	242	1.862	282	1.608	294	1	5	7	6	3.5	0.091	1
291	2009	11	2	18	16	28	734080	438	552	50	234	1.859	268	1.634	226	1	5	9	6	3	0.064	1
292	2009	11	2	18	29	26	734080	407	646	106	288	1.405	252	1.615	194	7	13	11	15	3.5	0.126	1
293	2009	11	2	18	43	26	734080	384	562	106	206	1.85	250	1.536	252	1	9	5	10.5	3	0.13	1
294	2009	11	2	18	57	0	734080	381.5	568	134	208	1.813	226	1.688	188	1	17	11	18.5	4.5	0.177	1
295	2009	11	2	19	9	36	734080	385	512	68	212	1.807	232	1.659	240	1	7	9	6	2.5	0.09	1
296	2009	11	2	19	22	8	734080	377	434	56	198	1.881	180	2.094	182	1	7	1	10.5	5.5	0.091	1
297	2009	11	2	19	32	24	734080	394.5	574	98	218	1.784	258	1.529	214	1	11	13	24.5	9.5	0.124	1
298	2009	11	2	19	45	32	734080	403	528	86	208	1.894	234	1.718	286	1	5	1	14	9	0.106	1
299	2009	11	2	19	59	6	734080	403	494	88	206	1.925	200	2.013	458	1	5	1	10	6.5	0.092	1
300	2009	11	2	20	14	58	734080	409	488	68	216	1.866	204	2	298	1	3	1	8	6	0.087	1
301	2009	11	2	20	28	4	734080	396	508	98	224	1.741	186	2.129	366	1	3	1	7	6	0.112	1
302	2009	11	2	20	42	38	734080	376	416	28	206	1.808	182	2.055	9786	1	3	3	6.5	3.5	0.003	1
303	2009	11	2	23	32	40	734080	7	38	4	14	0.429	20	0.325	246	1	1	1	1.5	1	0.014	0
304	2009	11	2	23	37	24	734080	8.5	50	12	22	0.386	16	0.469	230	1	1	1	1	1	0.043	0
305	2009	11	2	23	42	4	734080	9	62	26	16	0.438	20	0.425	56	1	1	1	2.5	2	0.22	1
306	2009	11	2	23	44	2	734080	8.5	62	22	20	0.35	20	0.375	80	1	1	1	2.5	1.5	0.155	1
307	2009	11	2	23	46	24	734080	14.5	68	8	26	0.538	34	0.426	82	1	1	1	0.5	0.5	0.053	0
308	2009	11	2	23	48	54	734080	19	78	16	30	0.617	32	0.484	138	1	1	1	4	3.5	0.074	0
309	2009	11	2	23	52	30	734080	19.5	88	24	34	0.574	30	0.467	126	1	1	1	5.5	5.5	0.112	1
310	2009	11	2	23	56	4	734080	22	92	14	30	0.617	48	0.458	112	1	1	1	3.5	3.5	0.069	0
311	2009	11	2	23	59	28	734080	17	88	34	26	0.558	28	0.464	106	1	3	1	7.5	4	0.175	0
312	2009	11	3	0	2	42	734080	30.5	120	40	46	0.652	34	0.632	128	1	1	1	9.5	9	0.161	0
313	2009	11	3	0	6	50	734080	23.5	106	36	42	0.548	28	0.607	222	1	1	1	7	6.5	0.11	0
314	2009	11	3	0	12	18	734080	18.5	90	26	28	0.554	36	0.514	110	1	1	1	3	3	0.13	0
315	2009	11	3	0	15	38	734080	17	104	52	26	0.558	26	0.577	104	1	1	1	4.5	2.5	0.25	1
316	2009	11	3	0	19	6	734080	18	100	44	34	0.471	22	0.591	88	1	1	1	7	5	0.234	1
317	2009	11	3	0	22	14	734080	14	88	38	20	0.6	30	0.417	74	1	1	1	3.5	2	0.235	0
318	2009	11	3	0	24	56	734080	13	82	32	20	0.525	30	0.417	134	1	1	1	3	2.5	0.148	1
319	2009	11	3	0	28	32	734080	10.5	84	38	24	0.375	22	0.409	72	1	1	1	3	1.5	0.244	0
320	2009	11	3	0	31	8	734080	9	68	32	16	0.406	20	0.4	44	1	1	1	3.5	2.5	0.286	0
321	2009	11	3	0	33	0	734080	8.5	58	24	20	0.325	14	0.571	48	1	1	1	2.5	2	0.226	1
322	2009	11	3	0	34	46	734080	9	62	28	18	0.361	16	0.531	44	1	1	1	3	2.5	0.264	1
323	2009	11	3	0	36	32	734080	17.5	80	20	28	0.5	32	0.469	70	1	1	1	6	3.5	0.133	0
324	2009	11	3	0	39	2	734080	13.5	78	26	28	0.482	24	0.438	60	1	3	1	4	3	0.188	0
325	2009	11	3	0	41	20	734080	13	82	34	26	0.5	22	0.455	92	1	1	1	3	3	0.195	1
326	2009	11	3	0	44	14	734080	7	46	12	18	0.389	16	0.406	42	1	1	1	0.5	0.5	0.136	0
327	2009	11	3	0	45	42	734080	8	62	28	16	0.375	18	0.389	42	1	3	1	4	2.5	0.269	0
328	2009	11	3	0	47	26	734080	6.5	50	16	18	0.306	16	0.375	36	1	1	3	1.5	1	0.186	0
329	2009	11	3	0	48	52	734080	6.5	50	22	10	0.5	18	0.361	46	1	1	1	1.5	1.5	0.229	1
330	2009	11	3	0	50	28	734080	7.5	60	24	18	0.333	18	0.417	44	1	1	1	1.5	1.5	0.231	0
331	2009	11	3	0	52	12	734080	14	82	32	26	0.442	24	0.438	46	1	3	1	11	5	0.25	0
332	2009	11	3	0	54	20	734080	8.5	64	28	18	0.389	18	0.444	48	1	1	1	2	1.5	0.25	0
333	2009	11	3	0	56	12	734080	6.5	46	14	16	0.375	16	0.375	50	1	1	1	1	0.5	0.146	0
334	2009	11	3	0	57	48	734080	7	60	28	14	0.357	18	0.389	32	1	1	1	2	2	0.304	1
335	2009	11	3	0	59	20	734080	7	56	22	20	0.325	14	0.429	62	1	1	1	1.5	1	0.186	1
336	2009	11	3	1	1	18	734080	8	58	26	16	0.438	16	0.469	48	1	1	1	1.5	1	0.245	0
337	2009	11	3	1	3	4	734080	6.5	50	22	16	0.375	12	0.458	54	1	5	1	3.5	1.5	0.212	0
338	2009	11	3	1	4	48	734080	8	60	28	18	0.361	14	0.536	42	1	1	1	2	1.5	0.275	0
339	2009	11	3	1	6	30	734080	10	74	40	18	0.417	16	0.438	36	1	1	1	5.5	3	0.364	0
340	2009	11	3	1	8	20	734080	8.5	70	32	20	0.375	18	0.472	64	1	3	1	5	2.5	0.239	0
341	2009	11	3	1	10	34	734080	7.5	62	36	12	0.5	14	0.429	14	1	1	1	3	1.5	0.474	0
342	2009	11	3	1	11	50	734080	8	58	22	20	0.3	16	0.438	32	1	1	1	3	2	0.244	1
343	2009	11	3	1	13	20	734080	8.5	62	36	8	0.75	18	0.417	34	1	1	1	3.5	2.5	0.375	1
344	2009	11	3	1	14	56	734080	5.5	42	18	8	0.5	16	0.313	42	1	1	1	2	1.5	0.214	0
345	2009	11	3	1	16	20	734080	9	68	32	18	0.361	18	0.472	352	1	1	1	3	2.5	0.076	0
346	2009	11	3	1	23	20	734080	5.5	40	24	8	0.563	8	0.5	410	1	3	1	3.5	1.5	0.053	0
347	2009	11	3	1	30	50	734080	8	48	14	12	0.583	22	0.364	150	1	1	1	1	1	0.071	0
348	2009	11	3	1	34	8	734080	7.5	54	26	20	0.325	8	0.688	30	1	1	1	3	2	0.31	1
349	2009	11	3	1	35	32	734080	7.5	54	18	18	0.389	18	0.389	30	1	3	1	2	0.5	0.214	1
350	2009	11	3	1	36	56	734080	6.5	58	32	12	0.417	14	0.429	48	1	1	1	2	1.5	0.302	0
351	2009	11	3	1	38	42	734080	8.5	60	28	18	0.389	14	0.429	40	1	1	1	4	2.5	0.28	0
352	2009	11	3	1	40	22	734080	10	68	28	18	0.417	22	0.432	48	1	1	1	3	2.5	0.241	0
353	2009	11	3	1	42	18	734080	8	58	26	18	0.417	14	0.5	42	1	3	1	2.5	1	0.26	0
354	2009	11	3	1	43	58	734080	7.5	52	20	20	0.325	12	0.5	54	1	1	1	2.5	1.5	0.189	1
355	2009	11	3	1	45	44	734080	7	58	20	22	0.295	16	0.406	32	1	1	1	1	0.5	0.222	1
356	2009	11	3	1	47	14	734080	8.5	60	32	12	0.5	16	0.469	32	1	1	1	3.5	2.5	0.348	0
357	2009	11	3	1	48	46	734080	6.5	48	20	16	0.344	12	0.458	34	1	1	1	2	1	0.244	0
358	2009	11	3	1	50	8	734080	12.5	66	12	34	0.338	20	0.575	36	1	1	1	2	1	0.118	0
359	2009	11	3	1	51	50	734080	8	44	2	18	0.444	24	0.333	48	1	1	1	0	0	0.022	0
360	2009	11	3	1	53	22	734080	5.5	50	32	10	0.4	8	0.5	22	1	1	1	3	1.5	0.444	0
361	2009	11	3	1	54	34	734080	6.5	42	14	10	0.55	18	0.306	632	1	1	1	2	1	0.021	0
362	2009	11	3	2	5	48	734080	5.5	44	18	16	0.281	10	0.5	286	1	1	1	1.5	1	0.055	0
363	2009	11	3	2	11	18	734080	5	38	20	10	0.35	8	0.625	18	1	1	1	1.5	1.5	0.357	1
364	2009	11	3	2	12	14	734080	5.5	56	32	14	0.321	10	0.5	38	1	3	1	2.5	1	0.34	0
365	2009	11	3	2	13	48	734080	5	44	22	10	0.35	12	0.333	326	1	1	1	2.5	1.5	0.059	1
366	2009	11	3	2	19	58	734080	5	36	20	10	0.45	6	0.583	3988	1	1	1	2	1.5	0.005	1
367	2009	11	3	3	27	2	734080	6	66	30	24	0.208	12	0.417	36	1	1	1	2	1	0.294	0
368	2009	11	3	3	28	44	734080	6	50	20	14	0.357	16	0.313	34	1	1	1	2	1	0.238	1
369	2009	11	3	3	30	8	734080	6	58	28	22	0.227	8	0.563	180	1	1	1	2.5	1.5	0.118	1
370	2009	11	3	3	34	6	734080	5.5	48	28	12	0.375	8	0.5	474	1	3	1	3.5	2	0.054	1
371	2009	11	3	3	42	48	734080	7	36	12	12	0.458	12	0.583	124	1	1	1	1.5	1.5	0.075	0
372	2009	11	3	3	45	28	734080	5	74	40	18	0.194	16	0.219	26	1	3	1	4	2	0.4	0
373	2009	11	3	3	47	8	734080	5.5	52	34	10	0.4	8	0.625	36	1	5	1	4	1.5	0.386	0
374	2009	11	3	3	48	36	734080	6.5	64	38	16	0.313	10	0.55	44	1	3	1	3.5	1.5	0.352	0
375	2009	11	3	3	50	24	734080	6.5	60	28	16	0.344	16	0.375	134	1	3	1	2.5	1	0.144	1
376	2009	11	3	3	53	38	734080	5	52	30	14	0.321	8	0.5	44	1	1	1	1.5	1	0.313	0
377	2009	11	3	3	55	14	734080	23.5	98	46	26	0.904	26	0.885	54	1	5	1	2.5	1	0.303	0
378	2009	11	3	3	57	46	734080	18	94	26	28	0.643	40	0.4	424	1	1	1	2	2	0.05	0
379	2009	11	3	4	6	24	734080	7	88	64	12	0.583	12	0.417	NaN	1	1	1	2	2	NaN	0
							AVG	249.249	5.76951	1.17813	2.18133	1.35873	2.41004	1.25406	8.33422		5.02133					0.5947
							SD	203.314	3.93378	0.877382	1.54172	0.799313	1.76812	0.721739	27.6015		4.23375
							MAX	548	12.4	4.56667
							SUM		36.0594

## Sheet: SCF04_iknos_DiveStat
DiveNumber	Year	Month	Day	Hour	Min	Sec	JulDate	Maxdepth	Dduration	Botttime	DescTime	DescRate	AscTime	AscRate	PDI	DWigglesDesc	DWigglesBott	DWigglesAsc	TotVertDistBot	BottRange	Efficiency	IDZ	LightAtBott	LWiggles	LightAtSurf	Lattenuation	EuphoticDepth	TempAtSurf	TempAtBott	ThermoclineDepth
1	2009	10	30	12	20	32	734077	7.5	106	70	28	0.196	8	0.875	32	3	7	1	6.5	2.5	0.507	0	187.549	23	201.8	NaN	NaN	19.65	18.201	0
2	2009	10	30	12	22	50	734077	13	154	122	18	0.528	14	0.857	44	3	9	1	9.5	3.5	0.616	0	184.633	31	NaN	NaN	-10.7	19.95	17.138	0
3	2009	10	30	12	26	8	734077	14	154	110	26	0.538	18	0.556	44	1	9	1	11	6	0.556	1	185.813	27	NaN	NaN	-2	20.35	16.888	0
4	2009	10	30	12	29	26	734077	17	182	122	26	0.462	34	0.441	54	1	15	1	16	6	0.517	0	183.843	39	NaN	NaN	5.2	20.7	16.478	0
5	2009	10	30	12	33	22	734077	44.5	278	166	66	0.477	46	0.946	346	1	7	1	24	15	0.266	0	170.274	59	NaN	NaN	0.2	20.9	15.867	0
6	2009	10	30	12	43	46	734077	12	128	62	38	0.237	28	0.375	48	1	3	1	5.5	3	0.352	0	188.469	21	NaN	NaN	-13.4	23.15	18.145	0
7	2009	10	30	12	46	42	734077	10	124	62	28	0.286	34	0.25	32	1	7	3	7.5	2	0.397	0	189.047	17	NaN	NaN	-13.2	23.1	18.237	0
8	2009	10	30	12	49	18	734077	9	70	16	20	0.35	34	0.265	52	1	1	1	2	2	0.131	0	184.611	5	191.5	NaN	NaN	23.45	18.622	0
9	2009	10	30	12	51	20	734077	86.5	304	144	96	0.849	64	1.328	108	1	17	1	19.5	5	0.35	0	150.801	49	203.8	-0.367	7.4	23.5	15.242	0
10	2009	10	30	12	58	12	734077	6	54	22	12	0.5	20	0.25	146	1	3	1	2	1.5	0.11	0	192.292	5	175	NaN	NaN	23.85	19.883	0
11	2009	10	30	13	1	32	734077	118	374	182	90	1.122	102	1.157	166	1	11	1	25	17	0.337	0	141.641	71	NaN	NaN	4.9	23.95	14.658	0
12	2009	10	30	13	10	32	734077	5	46	8	16	0.313	22	0.205	40	1	1	1	0.5	0.5	0.093	0	191.35	1	210.5	NaN	NaN	24	20.68	1
13	2009	10	30	13	11	58	734077	10	84	28	24	0.333	32	0.281	122	1	3	1	4	2	0.136	0	194.733	11	200	NaN	NaN	24	18.237	0
14	2009	10	30	13	15	24	734077	116	332	138	122	0.951	72	1.514	78	1	5	1	15	10.5	0.337	0	144.586	35	NaN	NaN	4.4	24.1	14.684	1
15	2009	10	30	13	22	14	734077	119.5	334	182	62	1.694	90	1.328	208	1	13	1	23.5	14.5	0.336	1	140.432	39	157.7	0.341	6.3	24.1	14.518	0
16	2009	10	30	13	31	16	734077	161.5	414	174	114	1.303	126	1.274	344	1	3	1	20	13	0.23	0	125.244	55	NaN	NaN	4.8	24.15	14.231	0
17	2009	10	30	13	43	54	734077	194.5	410	130	132	1.383	148	1.311	196	1	7	1	17.5	12	0.215	0	115.568	33	NaN	NaN	5.9	24.15	13.356	0
18	2009	10	30	13	54	0	734077	214.5	426	154	126	1.702	146	1.455	208	1	11	1	19	6.5	0.243	0	107.186	37	NaN	NaN	5.2	24.1	13.351	0
19	2009	10	30	14	4	34	734077	229.5	408	126	136	1.625	146	1.551	206	1	11	1	18	9	0.205	1	104.449	31	NaN	NaN	2.5	24.1	13.3	0
20	2009	10	30	14	14	48	734077	237	430	142	146	1.613	142	1.655	182	1	11	1	11.5	2.5	0.232	1	99.181	37	NaN	NaN	4.5	24.05	13.304	0
21	2009	10	30	14	25	0	734077	258	408	114	148	1.615	146	1.757	438	1	11	1	29.5	19.5	0.135	1	100.422	27	180.3	11.933	11.2	24.05	13.273	0
22	2009	10	30	14	39	6	734077	361.5	482	134	154	1.942	194	1.863	356	1	3	1	73.5	68	0.16	0	77.169	19	NaN	NaN	3.1	24.05	11.456	0
23	2009	10	30	14	53	4	734077	263	402	126	136	1.875	140	1.871	474	1	13	1	29	10	0.144	0	97.477	31	NaN	NaN	-0.3	24.05	13.291	0
24	2009	10	30	15	7	40	734077	237	392	128	130	1.746	134	1.724	364	1	11	1	25	11	0.169	1	108.054	33	214.1	-0.196	7.9	24.1	13.275	0
25	2009	10	30	15	20	16	734077	257	478	190	132	1.765	156	1.603	380	1	11	3	51.5	27.5	0.221	1	109.161	43	NaN	NaN	1.9	24.2	13.18	0
26	2009	10	30	15	34	34	734077	256.5	476	186	132	1.708	158	1.608	496	1	17	7	57.5	33.5	0.191	1	108.367	47	NaN	NaN	3.1	24.2	13.036	2
27	2009	10	30	15	50	46	734077	238	426	106	150	1.587	170	1.297	328	1	3	9	18.5	17.5	0.141	1	115.852	21	NaN	NaN	3.2	24.25	13.205	1
28	2009	10	30	16	3	20	734077	220	342	96	130	1.673	116	1.789	186	1	9	1	26	15	0.182	1	119.495	29	205.9	-0.235	7.1	24.25	13.222	0
29	2009	10	30	16	12	8	734077	193.5	376	120	106	1.816	150	1.28	100	1	11	9	11.5	2.5	0.252	0	128.045	37	NaN	NaN	-1.7	24.25	13.272	3
30	2009	10	30	16	20	4	734077	219.5	450	138	118	1.725	194	1.131	80	1	3	7	18	16	0.26	0	121.886	41	NaN	NaN	-1.1	24.3	13.23	1
31	2009	10	30	16	28	54	734077	230.5	440	194	122	1.828	124	1.73	606	1	15	1	51	17.5	0.185	1	115.559	61	NaN	NaN	0.4	24.25	13.293	1
32	2009	10	30	16	46	20	734077	5.5	64	22	30	0.15	12	0.333	164	1	5	1	5.5	2	0.096	0	204.896	5	223	NaN	NaN	24.3	24.271	NaN
33	2009	10	30	16	50	8	734077	190.5	356	96	118	1.585	142	1.327	202	1	9	1	11.5	4	0.172	0	132.786	33	NaN	NaN	-0.2	24.35	13.322	0
34	2009	10	30	16	59	26	734077	214.5	344	134	110	1.714	100	2.05	236	1	9	1	40.5	26	0.231	0	127.897	27	NaN	NaN	2.4	24.35	13.328	0
35	2009	10	30	17	9	6	734077	189	292	48	108	1.745	136	1.371	122	1	3	1	9	5.5	0.116	0	129.84	11	NaN	NaN	-2.3	24.35	13.368	1
36	2009	10	30	17	16	0	734077	194.5	370	138	102	1.819	130	1.496	124	1	15	1	19	9	0.279	1	129.939	31	NaN	NaN	4.1	24.3	13.365	0
37	2009	10	30	17	24	14	734077	191	384	150	102	1.858	132	1.36	118	1	9	1	23	11.5	0.299	1	130.431	55	NaN	NaN	4.4	24.35	13.331	0
38	2009	10	30	17	32	36	734077	194	354	124	108	1.769	122	1.52	146	1	9	1	23.5	8.5	0.248	1	129.952	33	NaN	NaN	-3.1	24.35	13.344	1
39	2009	10	30	17	40	56	734077	218	432	154	114	1.632	164	1.329	106	1	3	5	33	32	0.286	0	125.913	41	NaN	NaN	-2.7	24	13.369	1
40	2009	10	30	17	49	54	734077	216	450	178	118	1.631	154	1.386	748	1	11	5	39	23.5	0.149	1	122.833	49	NaN	NaN	2.7	24.4	13.211	1
41	2009	10	30	18	9	52	734077	257	458	166	134	1.776	158	1.627	504	1	7	3	23	19	0.173	0	112.75	37	NaN	NaN	5.1	24.5	13.074	0
42	2009	10	30	18	25	54	734077	275	424	142	134	1.817	148	1.824	744	1	5	1	57.5	31.5	0.122	1	107.354	31	NaN	NaN	-1.1	24.45	13.072	1
43	2009	10	30	18	45	22	734077	285	482	130	160	1.775	192	1.432	550	1	5	7	24.5	11.5	0.126	1	102.326	27	NaN	NaN	-0.8	24.45	12.53	2
44	2009	10	30	19	2	34	734077	262.5	410	122	154	1.698	134	1.78	220	1	5	1	35	24	0.194	1	108.605	27	NaN	NaN	-4.5	24.45	12.793	1
45	2009	10	30	19	13	4	734077	277.5	492	170	148	1.784	174	1.586	292	1	5	1	23	13.5	0.217	1	99.584	39	NaN	NaN	1.2	24.45	12.817	0
46	2009	10	30	19	26	8	734077	268.5	416	90	158	1.646	168	1.583	218	1	3	3	12	8.5	0.142	1	99.641	21	NaN	NaN	2.8	24.45	12.965	2
47	2009	10	30	19	36	42	734077	237.5	462	142	140	1.679	180	1.317	318	1	15	7	15	3	0.182	0	108.535	41	NaN	NaN	-2.8	24.45	12.865	1
48	2009	10	30	19	49	42	734077	247.5	400	78	152	1.579	170	1.441	138	1	9	11	20	7.5	0.145	1	103.894	25	NaN	NaN	3.3	24.45	12.795	1
49	2009	10	30	19	58	40	734077	253.5	478	186	130	1.869	162	1.503	606	1	9	3	28.5	12	0.172	1	101.519	51	NaN	NaN	1	24.35	12.84	1
50	2009	10	30	20	16	44	734077	252.5	488	174	140	1.757	174	1.451	518	1	19	1	37.5	11.5	0.173	1	102.023	43	NaN	NaN	2.2	24.45	13.11	0
51	2009	10	30	20	33	30	734077	233	446	178	130	1.792	138	1.554	1540	1	9	1	34.5	24.5	0.09	1	105.558	39	NaN	NaN	2	24.4	13.136	0
52	2009	10	30	21	6	36	734077	244	424	150	132	1.761	142	1.673	974	1	15	1	42	15	0.107	1	99.135	45	NaN	NaN	4.1	24.45	13.16	0
53	2009	10	30	21	29	54	734077	299	416	74	178	1.657	164	1.823	330	1	11	1	12	4.5	0.099	0	74.079	13	NaN	NaN	1.3	24.45	11.459	0
54	2009	10	30	21	42	20	734077	296	448	122	166	1.783	160	1.822	330	1	5	1	12.5	6	0.157	1	77.452	23	NaN	NaN	5.9	24.4	11.486	0
55	2009	10	30	21	55	18	734077	278	412	108	156	1.779	148	1.848	342	1	13	1	15	4.5	0.143	1	80.168	23	165.1	0.608	7.8	24.45	11.811	0
56	2009	10	30	22	7	52	734077	225.5	474	214	132	1.708	128	1.758	206	1	11	1	40.5	13	0.315	0	100.197	57	NaN	NaN	4.4	24.45	13.424	0
57	2009	10	30	22	19	12	734077	222.5	450	182	124	1.794	144	1.406	202	1	9	1	36	20.5	0.279	1	102.533	43	NaN	NaN	3.9	24.4	13.498	0
58	2009	10	30	22	30	4	734077	196.5	368	116	120	1.633	132	1.458	128	1	9	1	21.5	9	0.234	0	107.301	29	NaN	NaN	3.8	24.45	13.448	0
59	2009	10	30	22	38	20	734077	212	472	214	110	1.732	148	1.426	94	1	9	1	36	22	0.378	1	101.47	49	NaN	NaN	5.5	24.3	13.45	1
60	2009	10	30	22	47	46	734077	219.5	370	120	118	1.843	132	1.636	122	1	15	1	19.5	3.5	0.244	1	92.832	33	NaN	NaN	2.5	24.25	13.451	0
61	2009	10	30	22	55	58	734077	235	402	130	124	1.819	148	1.588	506	1	13	3	35.5	11	0.143	1	87.538	29	NaN	NaN	3.1	24.2	13.502	1
62	2009	10	30	23	11	6	734077	260	426	126	148	1.666	152	1.711	372	1	13	1	22.5	13.5	0.158	0	74.18	13	NaN	NaN	6	24.35	13.163	0
63	2009	10	30	23	24	24	734077	276.5	460	118	170	1.612	172	1.608	596	1	11	1	11.5	3.5	0.112	1	59.525	11	NaN	NaN	5.4	24.15	12.68	0
64	2009	10	30	23	42	0	734077	290	504	162	164	1.634	178	1.629	138	1	1	3	21.5	21.5	0.252	1	48.912	3	146.8	NaN	NaN	24.25	13.048	2
65	2009	10	30	23	52	42	734077	58	356	294	34	1.397	28	1.804	56	1	45	1	113	21	0.714	0	109.843	103	165	NaN	NaN	24.25	16.808	0
66	2009	10	30	23	59	34	734077	47	268	164	26	1.654	78	0.442	52	1	25	5	50.5	13	0.512	0	102.828	55	151.3	NaN	NaN	24.15	17.314	1
67	2009	10	31	0	4	54	734077	41	158	92	28	1.464	38	0.895	62	1	7	1	43	19.5	0.418	0	109.665	23	143.8	NaN	NaN	24.15	18.098	4
68	2009	10	31	0	8	34	734077	93	224	78	68	1.309	78	0.987	172	1	7	1	27	16	0.197	0	68.162	13	136.3	NaN	NaN	24.15	15.918	3
69	2009	10	31	0	15	10	734077	35.5	170	96	30	1.117	44	0.75	46	1	9	1	43.5	19.5	0.444	0	84.602	31	123	NaN	NaN	24.2	18.001	4
70	2009	10	31	0	18	46	734077	63.5	200	58	58	0.931	84	0.756	42	1	7	1	16.5	11.5	0.24	0	66.183	11	108.5	NaN	NaN	24.15	16.635	5
71	2009	10	31	0	22	48	734077	40.5	192	128	30	1.15	34	0.838	34	1	5	1	22	12	0.566	0	72.135	29	113.3	NaN	NaN	24.1	17.302	0
72	2009	10	31	0	26	34	734077	80	286	4	228	0.342	54	1.444	54	11	1	1	4	2	0.012	0	50.25	1	105.5	NaN	NaN	24.05	16.317	0
73	2009	10	31	0	32	14	734077	130	322	4	244	0.523	74	1.73	126	9	1	1	4.5	2.5	0.009	0	43.5	1	99	NaN	NaN	24.15	15.25	1
74	2009	10	31	0	39	42	734077	34.5	114	64	24	1.396	26	1	38	1	5	1	32.5	19.5	0.421	0	71.455	9	88.5	NaN	NaN	23.85	17.93	4
75	2009	10	31	0	42	14	734077	26.5	92	52	16	1.563	24	0.813	20	1	5	1	13.5	7	0.464	0	74.037	9	97	NaN	NaN	24.15	18.244	2
76	2009	10	31	0	44	6	734077	26	134	86	24	1.083	24	0.813	18	1	7	1	11.5	6.5	0.566	1	76.847	17	99.3	NaN	NaN	24.15	18.201	0
77	2009	10	31	0	46	38	734077	232	318	4	192	1.19	122	1.877	140	11	1	1	6.5	3.5	0.009	0	40.083	1	99.3	NaN	NaN	24.1	13.683	0
78	2009	10	31	0	54	16	734077	26.5	72	24	24	1.104	24	0.813	34	1	1	1	7	7	0.226	0	75.462	1	98.5	NaN	NaN	24.15	17.992	3
79	2009	10	31	0	56	2	734077	29	86	26	20	1.35	40	0.662	38	1	3	1	5.5	2.5	0.21	1	71.161	3	87.5	NaN	NaN	24.15	17.818	2
80	2009	10	31	0	58	6	734077	31.5	148	72	22	1.386	54	0.426	34	1	1	1	9.5	8.5	0.396	1	74.831	11	94.5	NaN	NaN	24.2	17.918	2
81	2009	10	31	1	1	8	734077	35.5	184	116	26	1.077	42	0.679	58	1	3	1	15.5	7.5	0.479	0	72.508	21	100.8	NaN	NaN	24.15	17.669	0
82	2009	10	31	1	5	10	734077	37	192	122	34	0.926	36	0.736	30	1	5	1	20	10.5	0.55	1	71.758	17	98	NaN	NaN	24.05	17.646	3
83	2009	10	31	1	8	52	734077	45.5	222	26	50	0.91	146	0.253	30	1	3	5	9.5	8.5	0.103	0	65.304	1	100.3	NaN	NaN	23.7	16.968	4
84	2009	10	31	1	13	4	734077	25.5	168	108	26	0.981	34	0.647	26	1	9	1	11.5	5	0.557	0	79.591	23	95	NaN	NaN	24.05	18.165	5
85	2009	10	31	1	16	18	734077	43.5	208	94	46	0.946	68	0.456	34	1	3	3	27.5	20	0.388	0	71.865	13	99.3	NaN	NaN	24	17.666	1
86	2009	10	31	1	20	20	734077	154.5	200	2	112	1.379	86	1.797	108	7	1	1	0	0	0.006	0	43.875	1	89	NaN	NaN	24.05	14.85	0
87	2009	10	31	1	25	28	734077	31	128	68	22	1.386	38	0.605	34	1	5	1	14.5	10	0.42	0	77.271	9	101	NaN	NaN	24.05	17.98	5
88	2009	10	31	1	28	10	734077	40.5	162	4	102	0.382	56	0.688	18	7	1	1	3.5	2	0.022	0	63	1	94	NaN	NaN	24.05	17.183	5
89	2009	10	31	1	31	10	734077	123.5	220	4	134	0.884	82	1.488	56	5	1	1	6.5	5	0.014	0	45	1	102.5	NaN	NaN	24.05	15.217	0
90	2009	10	31	1	35	46	734077	58.5	146	34	62	0.944	50	0.92	36	3	3	1	22.5	17.5	0.187	0	57.722	5	99.5	NaN	NaN	23.8	16.606	0
91	2009	10	31	1	38	48	734077	35	172	112	24	1.396	36	0.708	30	1	3	1	12	9.5	0.554	0	74.711	17	99.5	NaN	NaN	24.05	17.746	3
92	2009	10	31	1	42	10	734077	35	216	158	26	1.308	32	0.781	26	1	7	1	19	10	0.653	1	75.088	25	106	NaN	NaN	24.1	17.655	1
93	2009	10	31	1	46	12	734077	34	74	38	28	1.196	8	3.875	56	1	3	1	9.5	6	0.292	1	72.325	5	97.3	NaN	NaN	24.05	17.538	0
94	2009	10	31	1	48	22	734077	33	184	126	26	1.25	32	0.906	36	1	5	1	13.5	4.5	0.573	1	75.664	25	75.8	NaN	NaN	24.05	17.548	2
95	2009	10	31	1	52	2	734077	33.5	182	136	18	1.389	28	1.107	26	1	7	1	18	8.5	0.654	1	75.569	25	100.3	NaN	NaN	24.05	17.623	3
96	2009	10	31	1	55	30	734077	239.5	332	58	144	1.288	130	1.831	168	3	9	1	70.5	54.5	0.116	0	37.758	1	95.5	NaN	NaN	24	13.682	1
97	2009	10	31	2	3	50	734077	33.5	96	16	32	0.953	48	0.698	40	1	3	1	9	4	0.118	0	65.417	5	95.3	NaN	NaN	24.05	17.606	2
98	2009	10	31	2	6	6	734077	32	174	126	24	1.271	24	1.083	28	1	7	1	16.5	6	0.624	1	76.781	19	101.3	NaN	NaN	23.9	17.743	2
99	2009	10	31	2	9	28	734077	42	236	170	32	0.984	34	1	38	1	9	1	26.5	10.5	0.62	0	72.91	23	96	NaN	NaN	23.95	17.176	3
100	2009	10	31	2	14	2	734077	203.5	264	14	134	1.444	116	1.754	96	3	1	1	10	10	0.039	0	39.688	1	100.3	NaN	NaN	23.95	13.919	2
101	2009	10	31	2	20	2	734077	48	178	76	60	0.8	42	1.119	36	1	7	1	26	10	0.355	0	68.103	11	99.3	NaN	NaN	24	16.676	1
102	2009	10	31	2	23	36	734077	59.5	190	92	48	1.229	50	0.86	46	1	9	1	31	19.5	0.39	0	66.378	11	100.3	NaN	NaN	23.95	16.612	0
103	2009	10	31	2	27	32	734077	56	252	164	50	0.89	38	1.066	36	1	9	1	47	16.5	0.569	1	66.916	21	93.3	NaN	NaN	23.9	16.598	0
104	2009	10	31	2	32	20	734077	65.5	156	58	68	0.691	30	1.683	32	1	1	1	33.5	18.5	0.309	0	55.65	9	94	NaN	NaN	23.9	16.388	0
105	2009	10	31	2	35	28	734077	223	350	14	156	1.429	180	1.225	96	9	5	1	10.5	4	0.031	0	36.125	1	95.8	NaN	NaN	23.9	13.612	1
106	2009	10	31	2	42	54	734077	75.5	202	88	44	1.42	70	0.793	294	1	13	7	58	20	0.177	0	47.328	17	97	NaN	NaN	23.9	16.24	3
107	2009	10	31	2	51	10	734077	206.5	308	4	190	1.063	114	1.803	128	7	1	1	5.5	4.5	0.009	0	37.25	1	95.8	NaN	NaN	23.9	13.817	0
108	2009	10	31	2	58	26	734077	173.5	248	48	96	1.74	104	1.668	110	3	9	1	21.5	7	0.134	0	40.28	1	99.3	NaN	NaN	23.85	14.388	0
109	2009	10	31	3	4	24	734077	67.5	220	138	44	1.455	38	1.539	154	1	17	1	57.5	13	0.369	0	50.4	25	99.5	NaN	NaN	23.85	16.305	0
110	2009	10	31	3	10	38	734077	100	200	40	66	1.235	94	1.064	54	1	3	1	21.5	19.5	0.157	0	47.202	1	89.8	NaN	NaN	23.8	15.881	0
111	2009	10	31	3	14	52	734077	194.5	284	4	172	1.113	108	1.787	104	5	1	1	4.5	3	0.01	0	38.583	1	98.8	NaN	NaN	23.75	13.95	0
112	2009	10	31	3	21	20	734077	83.5	280	118	52	1.49	110	0.759	186	1	9	11	72	22	0.253	0	52.288	9	98.3	NaN	NaN	23.8	16.064	0
113	2009	10	31	3	29	6	734077	174.5	266	58	124	1.278	84	1.881	130	3	3	1	35.5	16.5	0.146	0	36.033	1	94.3	NaN	NaN	23.85	14.532	0
114	2009	10	31	3	35	42	734077	154	240	4	144	1.056	92	1.647	120	3	1	1	4.5	2.5	0.011	0	36.583	1	98	NaN	NaN	23.8	14.9	0
115	2009	10	31	3	41	42	734077	170	320	34	196	0.712	90	1.85	530	13	7	1	42	32.5	0.04	0	36.639	1	77.5	NaN	NaN	23.85	14.725	0
116	2009	10	31	3	55	52	734077	66.5	140	16	56	1.08	68	0.978	150	1	1	1	6	6	0.055	0	58.444	3	96.8	NaN	NaN	23.85	16.1	2
117	2009	10	31	4	0	42	734077	84	184	4	76	1.092	104	0.798	142	1	1	1	2	1	0.012	0	50.25	1	96.3	NaN	NaN	23.8	15.9	2
118	2009	10	31	4	6	8	734077	86	188	28	70	1.214	90	0.761	1670	1	3	1	19.5	18	0.015	1	50.667	1	82.3	NaN	NaN	23.75	15.883	2
119	2009	10	31	4	37	6	734077	79.5	180	2	72	1.104	106	0.75	58	1	1	1	0	0	0.008	1	50	1	85.5	NaN	NaN	23.85	15.9	0
120	2009	10	31	4	41	4	734077	49	196	14	46	1.043	136	0.346	8	1	1	1	3	2	0.069	0	65	5	84.3	NaN	NaN	23.75	16.55	1
121	2009	10	31	4	44	28	734077	81.5	198	2	72	1.125	124	0.657	1212	1	1	1	0.5	0.5	0.001	0	48.125	1	96.5	NaN	NaN	23.7	15.9	0
122	2009	10	31	5	7	58	734077	33.5	154	76	36	0.861	42	0.56	46	1	5	1	14.5	10	0.38	0	78.179	19	92.3	NaN	NaN	23.65	16.882	0
123	2009	10	31	5	11	18	734077	34.5	146	40	30	1.117	76	0.336	42	1	1	3	10	9	0.213	1	72.405	7	89	NaN	NaN	23.65	16.876	0
124	2009	10	31	5	14	26	734077	89.5	232	24	110	0.814	98	0.832	26	3	3	3	12	10	0.093	0	45.827	1	84.5	NaN	NaN	23.65	15.815	1
125	2009	10	31	5	18	44	734077	71.5	220	34	82	0.872	104	0.563	44	1	3	1	14	13	0.129	0	51.736	3	87.3	NaN	NaN	23.65	16.097	0
126	2009	10	31	5	23	8	734077	125	242	32	136	0.853	74	1.689	124	5	5	1	13	9.5	0.087	0	38.206	1	92.8	NaN	NaN	23.65	15.088	0
127	2009	10	31	5	29	14	734077	68	112	22	48	1.417	42	1.381	24	1	5	1	17	13	0.162	0	49.896	7	70.3	NaN	NaN	23.7	16.354	0
128	2009	10	31	5	31	30	734077	17.5	36	4	10	1.3	22	0.75	126	1	1	1	5.5	4.5	0.025	0	73.917	1	90.5	NaN	NaN	23.65	17.817	0
129	2009	10	31	5	34	12	734077	86	244	128	56	1.25	60	1.067	184	1	7	1	88	36	0.299	0	52.904	11	79.5	NaN	NaN	23.65	16.118	0
130	2009	10	31	5	41	20	734077	40.5	86	8	32	1.109	46	0.88	72	1	1	1	5	5	0.051	0	68.05	1	71	NaN	NaN	23.65	16.76	0
131	2009	10	31	5	43	58	734077	15	20	4	8	1.563	8	1.625	58	1	1	1	4.5	2.5	0.051	0	73.667	1	99	NaN	NaN	23.65	17.983	0
132	2009	10	31	5	45	16	734077	32.5	134	64	32	0.922	38	0.605	40	1	3	1	13.5	9.5	0.368	0	75.985	11	100.8	NaN	NaN	23.65	16.906	0
133	2009	10	31	5	48	10	734077	79	220	114	62	1.081	44	1.795	114	1	15	1	69	29	0.341	0	50.625	23	103.8	NaN	NaN	23.65	16.39	0
134	2009	10	31	5	53	44	734077	67	92	22	42	1.202	28	2.375	60	1	1	1	17	16.5	0.145	0	56.292	1	80.8	NaN	NaN	23.65	16.404	0
135	2009	10	31	5	56	16	734077	184.5	286	44	150	1.013	92	1.973	224	5	9	1	45.5	32.5	0.086	0	37.533	1	71.8	NaN	NaN	23.65	14.3	0
136	2009	10	31	6	4	46	734077	22	88	34	16	1.188	38	0.579	36	1	3	1	6	4	0.274	0	73.597	7	91.5	NaN	NaN	23.65	17.353	0
137	2009	10	31	6	6	50	734077	209	338	22	204	0.946	112	1.866	190	7	3	1	18	16	0.042	0	33.75	1	96.3	NaN	NaN	23.6	13.821	0
138	2009	10	31	6	15	38	734077	19.5	76	26	18	0.917	32	0.609	98	1	3	1	7	3	0.149	0	72.464	5	80.8	NaN	NaN	23.6	17.561	0
139	2009	10	31	6	18	32	734077	134	230	84	72	1.465	74	1.811	174	1	9	1	46.5	30	0.208	0	38.029	3	86.5	NaN	NaN	23.55	15.095	0
140	2009	10	31	6	25	16	734077	29.5	116	44	20	1.25	52	0.567	48	1	3	1	12.5	7.5	0.268	0	66.293	7	86	NaN	NaN	23.55	17.035	0
141	2009	10	31	6	28	0	734077	254.5	312	32	140	1.582	140	1.807	160	3	7	1	42.5	35.5	0.068	0	36.985	1	74.8	NaN	NaN	23.55	13.615	0
142	2009	10	31	6	35	52	734077	27	100	22	32	0.594	46	0.587	58	1	3	1	9	8.5	0.139	0	67.104	3	89.8	NaN	NaN	23.45	17.037	0
143	2009	10	31	6	38	30	734077	22	98	34	30	0.65	34	0.471	32	1	1	1	8.5	6	0.262	0	69.167	7	84.8	NaN	NaN	23.45	17.422	0
144	2009	10	31	6	40	40	734077	51	140	22	52	0.856	66	0.667	206	1	1	5	13.5	7	0.064	0	48.396	7	88.3	NaN	NaN	23.35	16.621	0
145	2009	10	31	6	46	26	734077	33	114	4	52	0.625	58	0.552	60	1	1	1	1.5	1	0.023	0	59.833	1	83.3	NaN	NaN	23.35	16.8	0
146	2009	10	31	6	49	20	734077	43	144	26	48	0.875	70	0.586	12	1	3	1	4	2.5	0.167	0	54.893	3	88.8	NaN	NaN	23.3	16.539	0
147	2009	10	31	6	51	56	734077	36	190	60	60	0.542	70	0.443	126	1	5	5	20.5	8	0.19	0	53.782	17	75.8	NaN	NaN	23.25	16.765	2
148	2009	10	31	6	57	12	734077	33.5	128	28	54	0.593	46	0.587	26	1	1	1	8	6.5	0.182	1	61.4	3	82.8	NaN	NaN	23.25	16.793	0
149	2009	10	31	6	59	46	734077	35	192	62	80	0.406	50	0.64	42	1	3	1	13.5	6	0.265	1	58.555	9	80	NaN	NaN	23.1	16.748	0
150	2009	10	31	7	3	40	734077	142.5	260	4	178	0.798	78	1.788	92	3	1	1	3.5	3	0.011	0	41	1	83.5	NaN	NaN	23.1	14.85	0
151	2009	10	31	7	9	32	734077	31.5	148	56	32	0.984	60	0.508	26	1	3	1	20	10	0.322	0	59.009	5	85	NaN	NaN	22.95	16.84	0
152	2009	10	31	7	12	26	734077	37.5	134	20	50	0.54	64	0.586	34	1	1	1	10.5	10.5	0.119	0	57.977	3	83	NaN	NaN	22.9	16.705	0
153	2009	10	31	7	15	14	734077	29	96	30	28	0.786	38	0.592	26	3	1	1	13.5	7	0.246	0	57.938	9	81.3	NaN	NaN	22.9	16.906	0
154	2009	10	31	7	17	16	734077	197	242	14	112	1.754	116	1.664	102	3	3	1	10.5	7	0.041	0	38.531	1	86	NaN	NaN	22.85	13.887	0
155	2009	10	31	7	23	0	734077	28.5	110	44	30	0.95	36	0.639	24	3	3	1	12.5	9	0.328	0	60.348	7	84.5	NaN	NaN	22.8	17.191	0
156	2009	10	31	7	25	14	734077	24.5	94	14	40	0.613	40	0.575	28	1	1	1	1.5	1.5	0.115	0	62.125	3	81.5	NaN	NaN	22.65	17.1	0
157	2009	10	31	7	27	16	734077	53.5	164	22	108	0.389	34	1.574	82	9	1	1	11.5	11.5	0.089	0	45.813	1	86.5	NaN	NaN	22.5	16.588	0
158	2009	10	31	7	31	22	734077	45	166	18	102	0.436	46	0.978	58	5	3	1	14.5	7.5	0.08	0	49.65	5	82	NaN	NaN	22.4	16.705	0
159	2009	10	31	7	35	6	734077	27	124	72	22	1.227	30	0.733	28	1	7	1	21	9	0.474	0	60.959	9	78.3	NaN	NaN	22	17.33	0
160	2009	10	31	7	37	38	734077	148.5	204	8	114	1.294	82	1.811	114	7	1	1	1	1	0.025	0	39.4	1	88.3	NaN	NaN	21.25	15.09	0
161	2009	10	31	7	42	56	734077	31.5	134	78	26	1.058	30	1.017	48	1	9	1	28	10.5	0.429	0	57.788	15	75	NaN	NaN	20.95	17.209	0
162	2009	10	31	7	45	58	734077	194	228	2	110	1.764	116	1.668	100	3	1	1	0.5	0.5	0.006	0	39.125	1	80.5	NaN	NaN	20.6	13.85	0
163	2009	10	31	7	51	26	734077	29.5	100	42	20	1.475	38	0.684	20	1	3	1	14.5	9	0.35	0	60.352	3	74.8	NaN	NaN	20.15	17.17	3
164	2009	10	31	7	53	26	734077	108	142	4	54	1.907	84	1.25	72	3	1	1	8	5	0.019	0	44	1	85	NaN	NaN	20.05	15.767	0
165	2009	10	31	7	57	0	734077	112	244	22	166	0.56	56	2	264	9	3	1	22	19	0.043	1	41.542	3	83	NaN	NaN	19.9	15.758	0
166	2009	10	31	8	5	28	734077	15.5	48	2	22	0.705	24	0.646	226	1	1	1	0	0	0.007	0	65.125	1	86	NaN	NaN	20	19	0
167	2009	10	31	8	10	2	734077	19.5	90	36	22	0.727	32	0.516	386	1	3	1	7.5	3.5	0.076	0	65.276	7	83	NaN	NaN	20.1	18.105	0
168	2009	10	31	8	17	58	734077	5.5	68	18	14	0.357	36	0.153	1614	1	5	1	2.5	1	0.011	0	67.55	5	72.3	NaN	NaN	19.2	18.62	NaN
169	2009	10	31	8	46	0	734077	16	84	30	26	0.481	28	0.482	1034	1	3	1	7	3.5	0.027	0	59.313	3	74.3	NaN	NaN	21.75	19.447	0
170	2009	10	31	9	4	38	734077	11.5	64	12	32	0.359	20	0.525	2884	3	1	1	1	1	0.004	0	53.643	1	78.3	NaN	NaN	21.6	20.607	7
171	2009	10	31	9	53	46	734077	6.5	46	22	14	0.429	10	0.6	NaN	1	7	1	4	1	NaN	0	64.458	5	70.3	NaN	NaN	20.85	20.321	1
172	2009	11	1	20	20	14	734079	5	26	2	22	0.227	2	2.5	51704	1	1	1	0	0	0	0	209.125	1	207.8	NaN	NaN	25	24.475	0
173	2009	11	2	10	42	24	734079	5.5	160	38	114	0.035	8	0.688	20	15	3	1	3.5	1.5	0.211	0	74.075	7	79.5	NaN	NaN	20.05	18.6	0
174	2009	11	2	10	45	24	734079	8.5	94	74	10	0.65	10	0.85	12	1	7	1	7	2	0.698	0	70.507	13	90.8	NaN	NaN	19.3	18.418	0
175	2009	11	2	10	47	10	734079	9	90	64	14	0.643	12	0.542	8	1	3	1	3.5	3	0.653	1	70.697	11	85.3	NaN	NaN	19.6	18.386	0
176	2009	11	2	10	48	48	734079	6	118	50	12	0.5	56	0.08	238	1	3	3	2.5	1.5	0.14	0	71.817	11	86.3	NaN	NaN	20.05	18.837	2
177	2009	11	2	10	54	44	734079	5	136	46	82	0.043	8	0.563	30	11	7	1	5	1.5	0.277	0	76.448	15	81.3	NaN	NaN	20.85	20.635	NaN
178	2009	11	2	10	57	30	734079	9	156	116	30	0.217	10	0.85	34	1	7	1	6	2.5	0.611	0	78.055	25	83.3	NaN	NaN	20.6	19.645	0
179	2009	11	2	11	0	40	734079	23	174	78	18	0.944	78	0.231	80	1	3	3	12	6	0.307	0	73.506	15	84	NaN	NaN	22.5	19.975	0
180	2009	11	2	11	4	54	734079	8.5	60	24	14	0.607	22	0.295	1242	1	3	1	3	2	0.018	0	84.5	9	84.5	NaN	NaN	22.85	21.635	3
181	2009	11	2	11	26	36	734079	26.5	108	14	34	0.574	60	0.442	166	1	1	1	7	7	0.051	0	130.969	5	143	NaN	NaN	23.45	21.463	10
182	2009	11	2	11	31	10	734079	41.5	202	114	32	1.016	56	0.527	288	1	3	1	28	12.5	0.233	0	129.319	35	127.5	NaN	NaN	23.45	19.848	6
183	2009	11	2	11	39	20	734079	30.5	88	22	22	1.227	44	0.636	114	1	1	1	6	3.5	0.109	0	138.646	7	139.5	NaN	NaN	23.4	21.125	16
184	2009	11	2	11	42	42	734079	78	264	98	64	1.023	102	0.676	540	1	5	1	26.5	13	0.122	0	131.085	31	171	NaN	NaN	23.45	15.626	7
185	2009	11	2	11	56	6	734079	135	360	116	132	0.992	112	1.205	496	1	3	1	5	4	0.136	0	120.258	25	195.1	-0.2	9	23.4	14.569	12
186	2009	11	2	12	10	22	734080	178.5	366	124	126	1.313	116	1.401	154	1	5	1	62	20	0.238	0	109.651	25	NaN	NaN	3.8	23.35	13.913	10
187	2009	11	2	12	19	2	734080	179	458	206	122	1.369	130	1.365	146	1	19	1	27.5	12	0.341	1	110.613	57	158.5	0.4	6.8	23.35	14	11
188	2009	11	2	12	29	6	734080	197	448	178	122	1.537	148	1.331	130	1	17	1	22	10.5	0.308	0	104.992	45	NaN	NaN	-0.7	23.35	13.654	11
189	2009	11	2	12	38	44	734080	230.5	484	206	136	1.614	142	1.546	186	1	9	1	27	11	0.307	0	95.603	29	NaN	NaN	0.5	23.3	12.954	10
190	2009	11	2	12	49	54	734080	223	436	142	138	1.576	156	1.426	164	1	11	1	11	5.5	0.237	1	103.309	35	NaN	NaN	1.7	23.3	13.208	2
191	2009	11	2	12	59	54	734080	241.5	556	282	146	1.562	128	1.887	280	1	17	1	28.5	14.5	0.337	1	100.502	67	180.1	-1.884	8.3	23.25	13.561	0
192	2009	11	2	13	13	50	734080	276	592	258	156	1.712	178	1.551	184	1	19	5	30	9	0.332	0	92.098	45	NaN	NaN	-1.3	23.25	12.15	6
193	2009	11	2	13	26	46	734080	303	432	96	156	1.933	180	1.683	280	1	13	5	27.5	5.5	0.135	1	75.612	21	NaN	NaN	0.9	23.25	11.435	3
194	2009	11	2	13	38	38	734080	308.5	436	122	154	1.987	160	1.922	258	1	15	1	30.5	5.5	0.176	1	73.694	21	NaN	NaN	4.6	23.25	10.265	7
195	2009	11	2	13	50	12	734080	336	492	130	158	2.044	204	1.623	184	1	13	3	46	14.5	0.192	1	64.932	21	NaN	NaN	0.3	23.25	9.606	8
196	2009	11	2	14	1	28	734080	353	488	146	160	2.169	182	1.94	410	1	15	1	37.5	8.5	0.163	1	56.537	25	NaN	NaN	3.8	23.25	9.341	6
197	2009	11	2	14	16	26	734080	358	500	150	174	2.046	176	1.889	324	1	11	1	49.5	31.5	0.182	1	63.789	17	NaN	NaN	-0.7	23.25	9.669	1
198	2009	11	2	14	30	10	734080	342	500	170	164	2.082	166	1.979	356	1	17	1	57	14.5	0.199	1	65.718	23	NaN	NaN	3.5	23.25	9.78	0
199	2009	11	2	14	44	26	734080	337.5	430	78	170	1.979	182	1.849	326	1	7	1	12	3.5	0.103	1	66.806	13	NaN	NaN	3.7	23.3	9.711	1
200	2009	11	2	14	57	2	734080	325.5	464	154	156	1.987	154	2.016	274	1	13	1	51.5	17.5	0.209	1	74.497	23	NaN	NaN	2	23.3	10.667	0
201	2009	11	2	15	9	20	734080	320	490	162	160	2	168	1.827	428	1	11	1	71	19.5	0.176	1	80.662	35	NaN	NaN	5	23.3	10.801	0
202	2009	11	2	15	24	38	734080	344	488	158	172	1.991	158	1.88	478	1	11	3	62.5	51	0.164	1	75.784	33	NaN	NaN	4.7	23.35	10.426	1
203	2009	11	2	15	40	44	734080	318	480	162	160	1.988	158	1.883	404	1	7	1	33.5	23	0.183	1	81.402	23	NaN	NaN	3.2	23.35	11.007	0
204	2009	11	2	15	55	28	734080	302.5	476	162	156	1.929	158	1.864	1314	1	15	1	30.5	8	0.091	1	80.994	33	NaN	NaN	3.7	23.35	11.107	2
205	2009	11	2	16	25	18	734080	267	484	230	152	1.75	102	1.858	148	1	9	1	96.5	81.5	0.364	0	102.065	49	NaN	NaN	2.4	23.4	12.317	4
206	2009	11	2	16	35	50	734080	150	198	18	80	1.875	100	1.395	1480	1	1	1	10.5	10.5	0.011	0	129.525	9	NaN	NaN	3.2	23.35	14.005	0
207	2009	11	2	17	3	48	734080	333	510	146	164	2.006	200	1.66	210	1	15	3	20	6	0.203	0	67.294	25	NaN	NaN	1.5	23.4	9.525	1
208	2009	11	2	17	15	48	734080	357	608	222	162	2.108	224	1.594	204	1	11	3	21.5	15.5	0.273	1	60.978	17	NaN	NaN	2.8	23.35	9.41	6
209	2009	11	2	17	29	20	734080	369	670	318	168	2.158	184	1.405	600	1	5	9	119	110.5	0.25	1	53.148	31	NaN	NaN	4.4	23.35	9.5	6
210	2009	11	2	17	50	30	734080	335.5	584	182	164	2.043	238	1.321	184	1	15	11	35.5	23.5	0.237	1	57.829	21	NaN	NaN	1.8	23.4	9.782	11
211	2009	11	2	18	3	18	734080	347.5	484	154	160	2.056	170	1.847	352	1	15	5	70	34.5	0.184	1	70.221	25	NaN	NaN	2.2	23.4	9.838	12
212	2009	11	2	18	17	14	734080	329	460	134	152	2.135	174	1.81	318	1	11	3	38.5	17	0.172	1	76.871	25	NaN	NaN	1.5	23.4	9.937	4
213	2009	11	2	18	30	12	734080	366	558	178	158	2.038	222	1.462	272	1	5	7	98.5	45	0.214	0	68.706	23	NaN	NaN	4.1	23.45	9.902	2
214	2009	11	2	18	44	2	734080	327.5	484	138	166	1.973	180	1.717	474	1	11	3	25.5	19	0.144	0	77.468	31	NaN	NaN	1.9	23.45	10.159	4
215	2009	11	2	19	0	0	734080	340	528	186	166	2.021	176	1.713	280	1	13	3	69	45	0.23	1	72.803	33	NaN	NaN	0.8	23.45	10.237	7
216	2009	11	2	19	13	28	734080	313.5	510	150	146	2.147	214	1.404	162	1	17	9	36.5	15	0.223	1	76.063	35	NaN	NaN	3.4	23.45	10.043	1
217	2009	11	2	19	24	40	734080	313	440	150	142	2.169	148	2.003	292	1	19	1	55.5	16.5	0.205	1	73.75	35	NaN	NaN	4.9	23.45	10.672	0
218	2009	11	2	19	36	52	734080	344	506	126	158	2.104	222	1.55	322	1	17	5	47.5	12	0.152	1	61.32	17	NaN	NaN	3.7	23.45	9.884	0
219	2009	11	2	19	50	40	734080	343	570	142	158	2.076	270	1.265	330	1	7	17	33	16	0.158	1	61.326	11	NaN	NaN	4.7	23.45	9.808	3
220	2009	11	2	20	5	40	734080	335	502	98	162	2.04	242	1.382	378	1	13	9	23	6	0.111	1	58.14	17	NaN	NaN	4.8	23.45	9.994	2
221	2009	11	2	20	20	20	734080	325	528	146	148	2.128	234	1.389	520	1	11	5	20	10	0.139	1	69.463	23	NaN	NaN	3	23.45	11.18	6
222	2009	11	2	20	37	48	734080	311	494	174	154	1.997	166	1.867	1954	1	11	1	19.5	6	0.071	1	76.474	31	NaN	NaN	3.6	23.45	11.164	3
223	2009	11	2	21	18	36	734080	276.5	492	186	154	1.792	152	1.813	2288	1	15	1	10.5	2	0.067	0	88.457	39	NaN	NaN	0.9	23.45	11.793	8
224	2009	11	2	22	4	56	734080	299	584	202	164	1.817	218	1.367	1428	3	17	7	11	1.5	0.1	1	73.809	35	NaN	NaN	4.8	23.4	11.961	8
225	2009	11	2	22	38	28	734080	256.5	472	138	146	1.757	188	1.165	96	1	1	7	37.5	37.5	0.243	0	92.921	23	NaN	NaN	1.1	23.4	13.697	7
226	2009	11	2	22	47	56	734080	238	528	210	136	1.61	182	1.266	128	1	13	9	43	19	0.32	1	88.797	55	NaN	NaN	-2	23.35	13.795	4
227	2009	11	2	22	58	52	734080	233.5	484	214	126	1.798	144	1.542	106	1	11	1	30.5	11.5	0.363	1	83.803	57	NaN	NaN	3.9	23.35	13.407	0
228	2009	11	2	23	8	42	734080	220	488	242	124	1.77	122	1.791	118	1	9	1	8	3	0.399	1	81.547	47	NaN	NaN	5.1	23.35	13.32	3
229	2009	11	2	23	18	48	734080	215.5	454	186	116	1.853	152	1.408	106	1	19	1	12	2	0.332	1	79.324	39	149.3	NaN	NaN	23.4	13.495	5
230	2009	11	2	23	28	8	734080	212	434	174	116	1.819	144	1.427	348	1	19	3	26.5	6.5	0.223	1	75.537	31	144	NaN	NaN	23.4	13.548	3
231	2009	11	2	23	41	10	734080	206	464	210	122	1.676	132	1.519	334	1	17	3	17	5.5	0.263	1	69.262	21	145	NaN	NaN	23.45	13.7	5
232	2009	11	2	23	54	28	734080	216	350	50	120	1.771	180	1.189	664	1	5	1	17.5	9	0.049	1	49.654	3	148.8	NaN	NaN	23.45	13.733	9
233	2009	11	3	0	11	22	734080	9.5	20	2	6	1.583	12	0.792	3124	1	1	1	0	0	0.001	0	96.5	1	110.8	NaN	NaN	23.4	23.4	NaN
234	2009	11	3	1	3	46	734080	46	128	34	42	0.845	52	0.885	38	1	5	1	13.5	11.5	0.205	0	54.361	3	82.5	NaN	NaN	23.35	18.617	3
235	2009	11	3	1	6	32	734080	34	118	54	26	1.135	38	0.684	50	1	7	1	16.5	8	0.321	0	58.455	9	81.3	NaN	NaN	23.35	19	2
236	2009	11	3	1	9	20	734080	54	186	58	40	1.087	88	0.46	562	1	3	9	29	16	0.078	0	49.892	7	81.5	NaN	NaN	23.35	18.04	5
237	2009	11	3	1	21	48	734080	32	92	48	22	1.364	22	1.205	58	1	5	1	30.5	11	0.32	0	57.57	5	79.5	NaN	NaN	23.35	19.286	3
238	2009	11	3	1	24	18	734080	47.5	136	44	42	1.048	50	0.84	46	1	5	1	20	9.5	0.242	0	49.467	7	87	NaN	NaN	23.35	18.543	2
239	2009	11	3	1	27	20	734080	39	160	60	34	1.074	66	0.545	38	1	5	1	19.5	6	0.303	0	54.169	11	86.5	NaN	NaN	23.3	19.256	3
240	2009	11	3	1	30	38	734080	48.5	184	130	30	1.4	24	1.5	64	1	9	1	65	17	0.524	0	53.742	17	85.3	NaN	NaN	23.3	18.652	0
241	2009	11	3	1	34	46	734080	36	130	56	30	1.15	44	0.807	44	1	3	1	25	12	0.322	0	58.259	7	85.8	NaN	NaN	23.3	19.419	3
242	2009	11	3	1	37	40	734080	32.5	128	80	20	1.525	28	0.929	38	1	7	1	39.5	11	0.482	1	61.829	9	83.8	NaN	NaN	23.3	19.715	2
243	2009	11	3	1	40	26	734080	30.5	144	70	22	1.386	52	0.538	34	1	5	3	27.5	10.5	0.393	1	63.118	15	87.5	NaN	NaN	23.3	19.853	4
244	2009	11	3	1	43	24	734080	28.5	92	52	18	1.444	22	1.227	38	1	3	1	6	2.5	0.4	1	62.926	7	84.3	NaN	NaN	23.3	19.967	0
245	2009	11	3	1	45	34	734080	41.5	180	92	28	1.125	60	0.55	46	1	3	1	42.5	22	0.407	0	60.324	15	90.5	NaN	NaN	23.3	19.179	2
246	2009	11	3	1	49	20	734080	45.5	156	64	28	1.25	64	0.648	42	1	3	3	18.5	10.5	0.323	1	57.659	9	82.8	NaN	NaN	23.3	18.083	5
247	2009	11	3	1	52	38	734080	72.5	180	4	126	0.563	50	1.41	68	7	1	1	3.5	2	0.016	0	48	1	87.3	NaN	NaN	23.3	16.033	3
248	2009	11	3	1	56	46	734080	102.5	202	96	52	1.385	54	1.88	116	3	5	1	95.5	54	0.302	0	46.311	7	82.8	NaN	NaN	23.3	16.368	2
249	2009	11	3	2	2	4	734080	142.5	180	2	86	1.657	92	1.543	80	3	1	1	0.5	0.5	0.008	0	40.625	1	90	NaN	NaN	23.25	14.875	3
250	2009	11	3	2	6	24	734080	148	272	2	198	0.747	72	2.056	142	11	1	1	0	0	0.005	1	41.25	1	73.3	NaN	NaN	23.3	14.425	0
251	2009	11	3	2	13	18	734080	83.5	178	4	130	0.635	44	1.875	100	11	1	1	2	1	0.014	0	46	1	78.3	NaN	NaN	23.3	15.75	1
252	2009	11	3	2	17	56	734080	182.5	284	10	182	1	92	1.984	198	9	3	1	4.5	2.5	0.021	0	38.583	1	74	NaN	NaN	23.3	14.05	0
253	2009	11	3	2	25	58	734080	43	112	16	24	1.771	72	0.556	110	1	3	7	9.5	6	0.072	0	52.361	5	90.8	NaN	NaN	23.3	17.467	9
254	2009	11	3	2	29	40	734080	185	230	4	128	1.438	98	1.888	130	3	1	1	1	1	0.011	0	39.083	1	95	NaN	NaN	23.3	14.167	4
255	2009	11	3	2	35	40	734080	56.5	150	42	34	1.662	74	0.574	80	1	9	5	28	17.5	0.183	0	51.477	9	87.3	NaN	NaN	23.3	17.118	3
256	2009	11	3	2	39	30	734080	60	94	22	38	1.553	34	1.471	40	1	3	1	13	11	0.164	1	49.563	3	97	NaN	NaN	23.3	16.829	1
257	2009	11	3	2	41	44	734080	7.5	22	0	10	0.75	12	0.625	70	1	1	1	0	0	0	0	73	1	68.3	NaN	NaN	23.3	22.65	2
258	2009	11	3	2	43	16	734080	60	142	66	30	1.533	46	1.261	46	1	3	1	35	14	0.351	0	55.36	7	78.5	NaN	NaN	23.3	16.787	0
259	2009	11	3	2	46	24	734080	147.5	200	64	58	1.819	78	1.853	122	3	9	1	68	43.5	0.199	0	40.652	3	98.5	NaN	NaN	23.25	14.955	2
260	2009	11	3	2	51	46	734080	187	252	40	112	1.638	100	1.825	136	3	7	1	17	5.5	0.103	0	36.298	1	94.5	NaN	NaN	23.3	14.15	1
261	2009	11	3	2	58	14	734080	140	266	48	146	0.87	72	1.882	234	11	9	3	33.5	15.5	0.096	0	40.1	1	96.8	NaN	NaN	23.3	15.174	1
262	2009	11	3	3	6	34	734080	85.5	150	44	46	1.522	60	1.425	76	1	7	1	23.5	16	0.195	0	46.783	1	100.3	NaN	NaN	23.25	16.183	1
263	2009	11	3	3	10	20	734080	196.5	296	20	140	1.121	136	1.445	86	7	5	3	44.5	41	0.052	0	41.5	1	102.5	NaN	NaN	23.25	14.586	1
264	2009	11	3	3	16	42	734080	73.5	188	76	42	1.5	70	1.029	56	1	9	1	33	19	0.311	0	53.827	5	91	NaN	NaN	23.25	16.914	2
265	2009	11	3	3	20	46	734080	171	292	18	188	0.846	86	1.988	198	9	3	1	15	13.5	0.037	0	37.85	1	96.5	NaN	NaN	23.25	14.665	3
266	2009	11	3	3	28	56	734080	67	158	52	38	1.421	68	0.985	42	1	5	1	19	15.5	0.26	0	48.583	7	94.5	NaN	NaN	23.25	17.004	2
267	2009	11	3	3	32	16	734080	97	194	4	122	0.791	68	1.39	90	7	1	1	3	2.5	0.014	0	44	1	96.8	NaN	NaN	23.25	15.833	1
268	2009	11	3	3	37	0	734080	59.5	200	104	36	1.569	60	0.992	68	1	11	3	60	11.5	0.388	0	55.198	17	81.3	NaN	NaN	23.3	17.306	4
269	2009	11	3	3	41	28	734080	227	338	2	220	1.032	116	1.957	400	7	1	1	0	0	0.003	0	37.5	1	93.8	NaN	NaN	23.3	14.05	2
270	2009	11	3	3	53	46	734080	53	200	98	40	1.325	62	0.782	3958	1	13	3	23.5	5	0.024	0	62.125	13	86.3	NaN	NaN	23.3	17.402	0
271	2009	11	3	5	3	4	734080	31	154	76	40	0.713	38	0.579	42	1	3	1	13.5	9	0.388	0	84.654	21	72.5	NaN	NaN	23.3	17.586	7
272	2009	11	3	5	6	20	734080	32.5	170	76	32	0.719	62	0.508	2632	1	7	1	17.5	9.5	0.027	1	80.853	15	103.3	NaN	NaN	23.3	17.673	6
273	2009	11	3	5	53	2	734080	36	180	74	42	0.786	64	0.422	20	1	1	1	12	9	0.37	0	78.559	15	74	NaN	NaN	23.25	17.604	2
274	2009	11	3	5	56	22	734080	36.5	252	98	66	0.53	88	0.295	10	1	3	3	13	10.5	0.374	1	78.035	23	100.5	NaN	NaN	23.25	17.679	3
275	2009	11	3	6	0	44	734080	45.5	282	128	58	0.647	96	0.354	16	1	5	5	30.5	11.5	0.43	0	72.269	23	106.8	NaN	NaN	23.2	17.318	3
276	2009	11	3	6	5	42	734080	83.5	166	4	110	0.705	52	1.538	126	7	1	1	9.5	6	0.014	0	51.5	1	88.5	NaN	NaN	23.2	15.933	0
277	2009	11	3	6	10	34	734080	54.5	194	46	88	0.619	60	0.642	64	1	1	1	16	16	0.178	0	71.5	7	100.8	NaN	NaN	23.2	16.938	1
278	2009	11	3	6	14	52	734080	25	166	86	38	0.566	42	0.464	48	1	5	1	11	5.5	0.402	0	84.449	25	70.3	NaN	NaN	23.2	17.91	4
279	2009	11	3	6	18	26	734080	28	138	58	38	0.605	42	0.643	32	1	1	1	6	5	0.341	0	81.858	19	79.5	NaN	NaN	23.2	17.785	0
280	2009	11	3	6	21	16	734080	33	180	98	44	0.705	38	0.645	56	1	3	1	11.5	8.5	0.415	0	78.795	27	91.8	NaN	NaN	23.2	17.814	4
281	2009	11	3	6	25	12	734080	28.5	156	86	36	0.708	34	0.618	48	1	5	1	12.5	7.5	0.422	0	80.432	25	90.8	NaN	NaN	23.2	17.68	2
282	2009	11	3	6	28	36	734080	115.5	226	44	112	1.004	70	1.386	120	1	5	1	26.5	18.5	0.127	0	41.239	1	95.5	NaN	NaN	23.25	14.991	0
283	2009	11	3	6	34	22	734080	128.5	176	4	58	2.19	114	1.105	272	3	1	3	4	2.5	0.009	0	57.083	1	99	NaN	NaN	23.25	14.8	4
284	2009	11	3	6	41	50	734080	30	128	32	42	0.714	54	0.5	84	1	1	3	3	3	0.151	0	78.176	13	99.8	NaN	NaN	23.25	17.518	4
285	2009	11	3	6	45	22	734080	75	200	48	64	0.906	88	0.847	32	1	1	1	17.5	17	0.207	0	58.16	7	100.8	NaN	NaN	23.25	16.71	3
286	2009	11	3	6	49	14	734080	62	222	76	84	0.685	62	1	52	3	3	1	24.5	13	0.277	0	65.218	15	104.3	NaN	NaN	23.25	17.067	2
287	2009	11	3	6	53	48	734080	83	210	14	86	0.948	110	0.755	32	1	1	1	1.5	1.5	0.058	0	51.594	1	101	NaN	NaN	23.25	16.037	0
288	2009	11	3	6	57	50	734080	51	120	62	24	2.125	34	1.25	24	1	5	1	36.5	18.5	0.431	0	67.766	19	83	NaN	NaN	23.25	17.448	0
289	2009	11	3	7	0	14	734080	51	158	62	44	0.955	52	0.971	140	1	5	1	12.5	9.5	0.208	1	64.406	15	99	NaN	NaN	23.2	17.309	1
290	2009	11	3	7	5	12	734080	38	150	52	44	0.807	54	0.639	138	1	1	1	6	3.5	0.181	0	77.565	13	104	NaN	NaN	23.2	17.548	0
291	2009	11	3	7	10	0	734080	46	132	24	56	0.786	52	0.865	116	1	1	1	3	2	0.097	0	72.538	5	83.8	NaN	NaN	23.2	17.6	0
292	2009	11	3	7	14	8	734080	61	218	88	52	0.913	78	0.66	190	1	1	1	23	13.5	0.216	0	65.878	13	74.8	NaN	NaN	23.2	17.144	0
293	2009	11	3	7	20	56	734080	53	210	98	46	0.924	66	0.652	108	1	3	1	21.5	11	0.308	0	70.58	19	105.5	NaN	NaN	23.15	17.43	0
294	2009	11	3	7	26	14	734080	44.5	196	114	32	1.016	50	0.65	128	1	3	1	26	12	0.352	0	69.849	27	81.5	NaN	NaN	23.05	17.988	0
295	2009	11	3	7	31	38	734080	43	214	94	54	0.75	66	0.621	84	1	9	1	8.5	3	0.315	1	64.917	29	67.8	NaN	NaN	23.05	17.917	2
296	2009	11	3	7	36	36	734080	75.5	296	4	240	0.315	52	1.442	140	11	1	1	1.5	1	0.009	0	50.667	1	98	NaN	NaN	22.9	15.7	0
297	2009	11	3	7	43	52	734080	120	316	70	188	0.62	58	1.448	92	3	3	3	42.5	36	0.172	0	37.201	3	77.5	NaN	NaN	22.95	15.41	1
298	2009	11	3	7	50	40	734080	35.5	78	14	44	0.807	20	1.55	90	3	3	3	7.5	6	0.083	0	61.781	3	95	NaN	NaN	22.9	18.175	1
299	2009	11	3	7	53	28	734080	108.5	220	10	88	1.227	122	0.889	54	1	3	1	1.5	1	0.036	0	41.5	1	94	NaN	NaN	22.9	15.6	0
300	2009	11	3	7	58	2	734080	122	296	66	120	1.017	110	0.786	40	1	3	5	36.5	35.5	0.196	0	41.875	5	99.8	NaN	NaN	22.85	15.428	0
301	2009	11	3	8	3	38	734080	74	152	52	38	1.75	62	0.847	86	1	5	5	44	25.5	0.218	0	54.593	7	103.5	NaN	NaN	22.85	16.241	0
302	2009	11	3	8	7	36	734080	75.5	284	114	94	0.734	76	0.711	40	1	7	1	34	21.5	0.352	1	55.435	9	102.3	NaN	NaN	22.9	16.132	0
303	2009	11	3	8	13	0	734080	95	318	94	94	0.878	130	0.692	64	1	7	3	27.5	15	0.246	0	47.49	7	100.3	NaN	NaN	22.8	15.65	0
304	2009	11	3	8	19	22	734080	78	222	8	110	0.695	104	0.75	52	1	1	1	1.5	1.5	0.029	0	51.6	1	83	NaN	NaN	22.85	15.7	0
305	2009	11	3	8	23	56	734080	69.5	198	88	72	0.778	38	1.605	94	3	3	1	23	13.5	0.301	0	57.978	7	104.5	NaN	NaN	22.85	15.777	0
306	2009	11	3	8	28	48	734080	34.5	42	10	20	1.525	12	2.875	88	1	1	1	4	4	0.077	0	66.125	3	105.8	NaN	NaN	22.9	17.583	0
307	2009	11	3	8	30	58	734080	20.5	102	40	20	0.95	42	0.476	12	1	1	3	2	1.5	0.351	0	78.857	11	100.8	NaN	NaN	22.95	19.307	2
308	2009	11	3	8	32	52	734080	83	228	4	138	0.598	86	0.953	40	5	1	1	1.5	1	0.015	0	49.25	1	98.3	NaN	NaN	22.9	15.6	0
309	2009	11	3	8	37	20	734080	169	392	186	100	1.69	106	1.41	82	1	11	3	25.5	19.5	0.392	0	32.396	3	104.3	NaN	NaN	22.95	14.216	1
310	2009	11	3	8	45	14	734080	46	162	54	64	0.648	44	0.977	402	1	3	1	8.5	4.5	0.096	0	65.241	13	100.8	NaN	NaN	22.95	17.364	0
311	2009	11	3	8	54	38	734080	119.5	178	72	64	1.594	42	2.738	118	1	3	1	38	17.5	0.243	0	41.514	3	79.5	NaN	NaN	22.95	15.312	0
312	2009	11	3	8	59	34	734080	103.5	178	16	52	1.99	110	0.882	74	1	3	7	21.5	14	0.063	0	43.75	1	103.5	NaN	NaN	22.9	15.589	0
313	2009	11	3	9	3	46	734080	121	194	34	106	1.142	54	1.611	100	1	5	1	42	35	0.116	0	40.528	3	97.5	NaN	NaN	22.9	15.522	0
314	2009	11	3	9	8	40	734080	82	208	106	58	1.302	44	1.489	180	1	7	1	56	32	0.273	0	47.968	11	100.3	NaN	NaN	22.95	15.78	0
315	2009	11	3	9	15	8	734080	82.5	276	116	58	1.034	102	0.77	222	1	7	1	33.5	22.5	0.233	1	51.114	7	77.3	NaN	NaN	22.95	15.731	0
316	2009	11	3	9	23	26	734080	96.5	236	70	98	0.699	68	1.015	68	1	5	1	59.5	29	0.23	0	48.875	5	78.5	NaN	NaN	23	16.25	3
317	2009	11	3	9	28	30	734080	92	186	68	46	1.989	72	0.979	72	1	5	1	32	26	0.264	1	47.129	3	75	NaN	NaN	23.05	16.261	0
318	2009	11	3	9	32	48	734080	113	234	50	84	1.345	100	0.98	84	1	7	1	31	15	0.157	0	41.942	5	79	NaN	NaN	23.05	15.515	0
319	2009	11	3	9	38	6	734080	108.5	254	4	116	0.935	134	0.81	272	1	1	1	0	0	0.008	1	41.917	1	93.5	NaN	NaN	23.05	15.233	1
320	2009	11	3	9	46	52	734080	153.5	356	146	98	1.429	112	1.304	84	1	7	1	25.5	13.5	0.332	0	34.017	3	97	NaN	NaN	22.85	14.175	0
321	2009	11	3	9	54	12	734080	139.5	316	120	96	1.266	100	1.395	218	1	5	3	42	18	0.225	1	35.164	3	82.8	NaN	NaN	22.85	14.296	0
322	2009	11	3	10	3	6	734080	47.5	200	96	34	1.309	70	0.614	624	1	5	1	21.5	8	0.117	0	60.031	23	97.8	NaN	NaN	22.85	17.503	2
323	2009	11	3	10	16	50	734080	30	108	20	38	0.789	50	0.48	246	1	3	1	7	6	0.056	0	67.932	5	101.5	NaN	NaN	22.9	19.318	1
324	2009	11	3	10	22	44	734080	112.5	238	60	82	1.274	96	1.099	46	1	1	1	15	8	0.211	0	39.024	7	89.5	NaN	NaN	22.9	15.11	0
325	2009	11	3	10	27	28	734080	31.5	152	26	58	0.483	68	0.463	200	1	3	3	5.5	4.5	0.074	0	63.982	5	95	NaN	NaN	22.85	18.593	1
326	2009	11	3	10	33	20	734080	35.5	128	68	28	1.25	32	0.813	28	3	5	1	15	10.5	0.436	0	64.393	11	77	NaN	NaN	22.8	18.76	0
327	2009	11	3	10	35	56	734080	24.5	30	2	12	2	16	1.531	148	1	1	1	0.5	0.5	0.011	0	60	1	73.3	NaN	NaN	22.8	19.3	1
328	2009	11	3	10	38	54	734080	15	48	6	16	0.938	26	0.538	52	1	1	1	1	1	0.06	0	75.688	1	94.8	NaN	NaN	22.65	19.4	0
329	2009	11	3	10	40	34	734080	94.5	264	4	178	0.525	82	1.134	162	5	1	1	2.5	1.5	0.009	0	44.083	1	86.5	NaN	NaN	22.6	15.7	0
330	2009	11	3	10	47	40	734080	112	138	28	70	1.536	40	2.725	152	1	1	1	7.5	4.5	0.097	0	39.35	3	91	NaN	NaN	22.5	15.523	0
331	2009	11	3	10	52	30	734080	65.5	70	2	34	1.926	34	1.912	54	1	1	1	0.5	0.5	0.016	0	49.25	1	100.8	NaN	NaN	22.25	17.325	5
332	2009	11	3	10	54	34	734080	14.5	44	18	14	1.036	12	0.917	42	1	3	1	4.5	4	0.209	0	77.025	5	90.5	NaN	NaN	22.65	22.325	0
333	2009	11	3	10	56	0	734080	133.5	222	70	82	1.39	70	1.421	286	1	3	1	54.5	34	0.138	0	38.826	5	92.5	NaN	NaN	22.85	15.151	0
334	2009	11	3	11	4	28	734080	123	220	68	68	1.779	84	1.464	126	1	7	1	60	19	0.197	1	40.7	3	90.5	NaN	NaN	22.5	15.48	0
335	2009	11	3	11	10	14	734080	124	254	118	68	1.728	68	1.618	86	1	15	1	60.5	20.5	0.347	1	45.517	11	104.8	NaN	NaN	22.5	14.897	0
336	2009	11	3	11	15	54	734080	130	194	30	86	1.506	78	1.615	78	1	5	1	6.5	4	0.11	1	48.578	5	118.8	NaN	NaN	22.25	14.019	1
337	2009	11	3	11	20	26	734080	154.5	334	166	82	1.744	86	1.541	80	1	13	1	42.5	22	0.401	0	61.705	17	106.5	NaN	NaN	20.45	13.834	0
338	2009	11	3	11	27	20	734080	185.5	280	92	76	1.776	112	1.634	94	1	7	1	73	50.5	0.246	0	64.878	17	119.5	NaN	NaN	20.55	13.917	0
339	2009	11	3	11	33	34	734080	179.5	292	102	98	1.832	92	1.859	126	1	9	1	50.5	23	0.244	1	73.433	25	156.8	NaN	NaN	21.35	13.767	0
340	2009	11	3	11	40	32	734080	203.5	342	154	100	1.695	88	1.761	90	1	3	1	126.5	48.5	0.356	0	78.651	35	170.3	NaN	NaN	22.65	13.711	0
341	2009	11	3	11	47	44	734080	191.5	386	182	106	1.708	98	1.663	122	1	9	3	137	40	0.358	1	84.88	51	175.5	NaN	NaN	22.6	13.703	1
342	2009	11	3	11	56	12	734080	244.5	376	122	118	1.725	136	1.794	152	1	13	1	92.5	41	0.231	0	72.851	23	181	NaN	NaN	22.6	12.953	0
343	2009	11	3	12	5	0	734081	242.5	394	162	108	1.944	124	1.887	104	1	11	1	76	32.5	0.325	1	78.466	33	NaN	NaN	3.6	22.65	13.205	0
344	2009	11	3	12	13	18	734081	274.5	414	118	162	1.679	134	1.608	100	1	5	3	64	59.5	0.23	0	72.688	17	NaN	NaN	1.1	22.75	12.775	1
345	2009	11	3	12	21	52	734081	259	410	114	136	1.893	160	1.391	94	1	5	1	45	36.5	0.226	1	81.737	21	NaN	NaN	0.5	23	12.497	0
346	2009	11	3	12	30	16	734081	246	360	130	104	1.707	126	1.48	114	1	7	3	136	68.5	0.274	1	86.102	29	NaN	NaN	0.1	22.95	13.172	2
347	2009	11	3	12	38	10	734081	273.5	370	100	132	1.754	138	1.978	208	1	5	1	60.5	42	0.173	0	75.525	21	NaN	NaN	2.7	23	12.387	0
348	2009	11	3	12	47	48	734081	266.5	366	82	138	1.931	146	1.733	162	1	9	3	33.5	16.5	0.155	1	74.619	25	NaN	NaN	-0.3	23.05	12.418	0
349	2009	11	3	12	56	36	734081	276	382	94	136	1.912	152	1.757	182	1	7	5	39	16	0.167	1	76.776	21	NaN	NaN	-0.2	23.1	12.45	4
350	2009	11	3	13	5	60	734081	277	410	108	148	1.865	154	1.711	164	1	11	3	33.5	16.5	0.188	1	76.591	25	NaN	NaN	2	23.15	12.442	2
351	2009	11	3	13	15	34	734081	267.5	380	84	140	1.893	156	1.699	176	1	11	3	25	9	0.151	1	79.953	21	NaN	NaN	-0.7	23.15	12.4	2
352	2009	11	3	13	24	50	734081	272.5	358	88	134	1.993	136	1.919	194	1	7	1	32	11.5	0.159	1	79.133	23	148	0.204	6.5	23.15	12.49	0
353	2009	11	3	13	34	2	734081	258.5	392	124	136	1.849	132	1.799	360	1	7	1	32	21	0.165	1	93.266	23	NaN	NaN	1.7	23.15	12.475	0
354	2009	11	3	13	46	34	734081	142	336	126	82	1.677	128	1.102	100	1	11	1	19.5	7	0.289	0	133.52	45	NaN	NaN	3.7	23.2	13.555	1
355	2009	11	3	13	53	50	734081	203	294	62	140	1.421	92	1.668	228	1	3	3	66.5	49.5	0.119	0	109.547	13	NaN	NaN	3.4	23.2	13.603	0
356	2009	11	3	14	2	32	734081	197	370	162	116	1.698	92	1.815	146	1	5	1	41	34.5	0.314	1	105.655	33	NaN	NaN	-0.6	23.2	13.845	0
357	2009	11	3	14	11	8	734081	219	354	112	110	1.668	132	1.496	122	1	7	5	101	35.5	0.235	0	111.189	29	NaN	NaN	3.7	23.2	13.438	2
358	2009	11	3	14	19	4	734081	277	398	112	124	1.879	162	1.701	134	1	7	1	61.5	44	0.211	0	91.456	27	NaN	NaN	4.3	23.2	12.731	0
359	2009	11	3	14	27	56	734081	281	404	56	150	1.837	198	1.417	114	1	3	3	9	5.5	0.108	1	85.647	15	NaN	NaN	2.4	23.2	12.203	1
360	2009	11	3	14	36	34	734081	214	380	102	126	1.524	152	1.253	140	1	5	1	47.5	23.5	0.196	0	114.053	29	NaN	NaN	-0.8	23.25	13.635	0
361	2009	11	3	14	45	14	734081	193	348	114	90	1.55	144	1.34	182	1	3	3	57.5	55.5	0.215	1	132.457	23	NaN	NaN	1.6	23.25	14.143	2
362	2009	11	3	14	54	4	734081	275	396	116	138	1.819	142	1.817	1260	1	15	3	76	26	0.07	0	91.564	31	NaN	NaN	-0.5	23.3	12.537	2
363	2009	11	3	15	21	40	734081	297	440	142	142	1.898	156	1.853	526	1	9	1	55.5	35.5	0.147	1	85	27	NaN	NaN	2.9	23.35	12.294	0
364	2009	11	3	15	37	46	734081	275	432	106	166	1.617	160	1.694	264	1	7	3	21.5	7	0.152	1	94.245	23	NaN	NaN	0.2	23.35	12.186	2
365	2009	11	3	15	49	22	734081	269.5	346	46	146	1.829	154	1.679	168	1	5	5	20.5	13.5	0.089	1	95.573	15	NaN	NaN	2.1	23.3	12.327	2
366	2009	11	3	15	57	56	734081	261.5	420	150	136	1.842	134	1.881	158	1	9	1	42.5	11.5	0.26	1	99.513	29	NaN	NaN	-1.2	23.25	12.31	0
367	2009	11	3	16	7	34	734081	277.5	394	124	128	2.027	142	1.937	190	1	11	1	38.5	23	0.212	1	92.706	39	NaN	NaN	0.3	23.3	11.665	0
368	2009	11	3	16	17	18	734081	280.5	458	134	142	1.93	182	1.533	218	1	7	5	39	18	0.198	1	93.621	33	NaN	NaN	2.6	23.25	11.573	2
369	2009	11	3	16	28	34	734081	284.5	444	122	144	1.976	178	1.565	146	1	13	9	25	8	0.207	1	84.024	31	NaN	NaN	-1.4	23.3	11.51	2
370	2009	11	3	16	38	24	734081	283.5	498	126	148	1.878	224	1.254	112	1	7	15	14	5.5	0.207	1	86.625	31	NaN	NaN	4.5	23.2	11.444	2
371	2009	11	3	16	48	34	734081	290.5	462	174	134	1.933	154	1.825	270	1	9	1	49	31.5	0.238	1	87.645	37	NaN	NaN	1.3	23.1	11.461	1
372	2009	11	3	17	0	46	734081	285	438	116	142	1.912	180	1.547	206	1	5	9	28	13.5	0.18	1	90.661	29	NaN	NaN	1.7	23.2	11.564	3
373	2009	11	3	17	11	30	734081	302	404	40	176	1.685	188	1.601	392	1	7	7	24.5	9	0.05	1	83.5	13	NaN	NaN	0.5	23.3	11.552	2
374	2009	11	3	17	24	46	734081	298	394	56	154	1.867	184	1.611	488	1	5	3	19	10.5	0.063	1	90.672	13	NaN	NaN	1.1	23.2	11.605	3
375	2009	11	3	17	39	28	734081	301	392	78	154	1.922	160	1.878	1660	1	9	1	20.5	9.5	0.038	1	84.044	19	NaN	NaN	0.8	23.05	11.711	0
376	2009	11	3	18	13	40	734081	300	450	138	152	1.766	160	1.837	3052	1	3	1	38.5	31.5	0.039	1	94.107	25	NaN	NaN	4	23.1	12.063	0
377	2009	11	3	19	12	2	734081	277	446	154	134	1.981	158	1.633	922	1	13	1	40.5	20	0.113	1	95.535	25	NaN	NaN	2.7	23.45	12.267	0
378	2009	11	3	19	34	50	734081	130	308	110	88	1.392	110	1.095	94	1	9	1	25	9.5	0.274	0	139.205	27	NaN	NaN	5.1	23.45	14.56	0
379	2009	11	3	19	41	32	734081	248.5	442	98	222	1.088	122	1.885	328	1	7	1	42	19.5	0.127	0	93.41	23	197.9	-0.248	6.1	23.55	12.628	0
380	2009	11	3	19	54	22	734081	293.5	440	114	166	1.684	160	1.644	134	1	7	1	56.5	34	0.199	0	84.103	23	NaN	NaN	2.6	23.55	11.642	0
381	2009	11	3	20	3	56	734081	245	332	60	140	1.75	132	1.523	186	1	7	3	53	44	0.116	0	94.702	17	NaN	NaN	3.7	23.55	12.482	1
382	2009	11	3	20	12	34	734081	268	438	154	120	1.775	164	1.622	140	1	11	3	92	57	0.266	1	95.766	43	NaN	NaN	0.5	23.5	12.078	1
383	2009	11	3	20	22	12	734081	277.5	432	114	132	2.049	186	1.401	122	1	13	3	62	19.5	0.206	1	86.078	31	NaN	NaN	3.2	23.65	12.04	2
384	2009	11	3	20	31	26	734081	270.5	414	84	132	1.928	198	1.333	132	1	9	5	41.5	16	0.154	1	86.552	27	NaN	NaN	-0.1	23.55	12.206	0
385	2009	11	3	20	40	32	734081	271.5	448	112	140	1.914	196	1.291	108	1	11	9	51	20	0.201	1	83.592	25	NaN	NaN	-1.5	23.6	12.281	1
386	2009	11	3	20	49	48	734081	251.5	412	80	138	1.819	194	1.18	84	1	9	7	66	28.5	0.161	1	89.866	27	NaN	NaN	4.3	23.55	12.317	0
387	2009	11	3	20	58	4	734081	253.5	414	100	120	2.025	194	1.258	120	1	7	9	44	17.5	0.187	1	89.461	27	NaN	NaN	1.5	23.6	12.283	1
388	2009	11	3	21	6	58	734081	326	556	94	186	1.591	276	1.152	2254	1	11	13	51	30	0.033	0	66.26	25	NaN	NaN	0.9	23.6	11.192	1
389	2009	11	3	21	53	48	734081	12	78	38	22	0.386	18	0.472	1196	1	1	1	7	3.5	0.03	0	192.313	11	NaN	NaN	-9.2	23.7	19.665	0
390	2009	11	3	22	15	2	734081	18.5	106	36	30	0.5	40	0.412	160	1	1	1	5.5	3.5	0.135	0	184.658	9	NaN	NaN	-8.6	23.6	19.453	0
391	2009	11	3	22	19	28	734081	21	116	44	30	0.5	42	0.429	862	1	1	1	9	6	0.045	0	183.402	13	NaN	NaN	0.9	23.15	18.652	1
392	2009	11	3	22	35	46	734081	8	64	8	34	0.235	22	0.341	1736	1	1	1	0.5	0.5	0.004	0	189.9	3	201	NaN	NaN	22.65	21.37	0
393	2009	11	3	23	5	46	734081	15	78	6	44	0.341	28	0.5	54	1	1	1	1	1	0.045	0	180.375	1	191.8	NaN	NaN	22.7	18.375	0
394	2009	11	3	23	7	58	734081	20.5	122	64	30	0.55	28	0.554	500	1	1	1	9	5	0.103	0	176.28	17	NaN	NaN	-14.5	22.45	18.082	0
395	2009	11	3	23	18	20	734081	8.5	66	28	20	0.3	18	0.333	60	1	1	1	5	2.5	0.222	0	182.417	11	164.5	NaN	NaN	22.5	21.093	1
396	2009	11	3	23	20	26	734081	12.5	92	42	28	0.339	22	0.409	48	1	3	1	7.5	3.5	0.3	0	178.386	15	NaN	NaN	-8.1	22.4	20.225	2
397	2009	11	3	23	22	46	734081	12	98	34	38	0.263	26	0.404	56	1	1	1	3.5	2	0.221	1	177.069	17	174.8	NaN	NaN	22.3	19.981	2
398	2009	11	3	23	25	20	734081	23.5	130	56	42	0.393	32	0.531	44	3	1	1	13.5	7	0.322	0	169.172	15	NaN	NaN	1.9	22.2	18.776	1
399	2009	11	3	23	28	14	734081	15	94	16	44	0.273	34	0.426	94	1	1	1	3.5	3	0.085	0	171.583	5	189.8	NaN	NaN	22.1	19.678	1
400	2009	11	3	23	31	22	734081	16.5	92	28	30	0.467	34	0.441	160	1	1	1	4	2.5	0.111	0	168.933	11	NaN	NaN	4.4	22	19.943	3
401	2009	11	3	23	35	34	734081	240	384	68	148	1.622	168	1.414	312	1	3	1	3.5	2.5	0.098	0	68.629	5	NaN	NaN	4.7	21.75	12.506	3
402	2009	11	3	23	47	10	734081	206.5	366	132	122	1.68	112	1.835	122	1	11	1	53.5	15.5	0.27	0	66.84	25	165.8	NaN	NaN	21.65	13.004	3
403	2009	11	3	23	55	18	734081	213	360	122	104	2.038	134	1.41	110	1	3	1	26	24	0.26	1	52.149	3	121.8	NaN	NaN	21.65	12.998	0
404	2009	11	4	0	3	8	734081	184.5	406	166	122	1.504	118	1.364	352	1	13	1	32.5	24	0.219	0	43.217	7	131.5	NaN	NaN	21.65	13.315	0
405	2009	11	4	0	15	46	734081	55	194	20	96	0.573	78	0.647	216	3	1	1	4.5	4.5	0.049	0	64.136	3	85.8	NaN	NaN	21.6	16.714	2
406	2009	11	4	0	22	36	734081	20.5	118	64	26	0.654	28	0.589	1014	1	5	1	9.5	4	0.057	0	73.598	13	101.3	NaN	NaN	21.6	18.617	1
407	2009	11	4	0	41	28	734081	20	110	48	28	0.554	34	0.5	58	1	1	1	7.5	4.5	0.286	1	46.67	3	64	NaN	NaN	23.4	21.444	1
408	2009	11	4	0	44	16	734081	26.5	126	38	48	0.552	40	0.487	54	1	1	1	7	7	0.211	0	43.275	5	56.8	NaN	NaN	23.35	21.475	0
409	2009	11	4	0	47	16	734081	23	126	38	42	0.488	46	0.435	44	1	1	1	5.5	3	0.224	0	45.063	3	60.5	NaN	NaN	23.5	21.71	0
410	2009	11	4	0	50	6	734081	49.5	180	56	58	0.629	66	0.682	56	1	5	1	19.5	13	0.237	0	39.914	3	57.8	NaN	NaN	23.4	18.307	0
411	2009	11	4	0	54	2	734081	120.5	272	12	126	0.94	134	0.899	166	1	1	1	2	2	0.027	0	34.821	1	61.3	NaN	NaN	23.45	14.65	0
412	2009	11	4	1	1	20	734081	7.5	100	34	22	0.295	44	0.125	114	1	3	1	4	2	0.159	0	57.5	3	65.5	NaN	NaN	23.15	22.769	NaN
413	2009	11	4	1	4	54	734081	33.5	182	74	36	0.764	72	0.333	1702	1	1	1	15.5	9.5	0.039	0	46.664	5	59.5	NaN	NaN	22.95	20.164	0
414	2009	11	4	1	36	18	734081	22	132	78	32	0.656	22	0.705	34	1	5	1	10.5	6.5	0.47	0	62.25	9	60.3	NaN	NaN	21.65	20.966	2
415	2009	11	4	1	39	4	734081	5	54	20	8	0.563	26	0.135	20	1	1	1	2	1.5	0.27	0	74.5	5	77.8	NaN	NaN	21.4	21.291	NaN
416	2009	11	4	1	40	18	734081	6	96	58	8	0.688	30	0.15	4	1	3	1	4	1.5	0.58	0	67.233	11	69.8	NaN	NaN	21.3	21.218	NaN
417	2009	11	4	1	41	58	734081	10.5	98	64	20	0.375	14	0.714	10	1	3	1	4.5	3	0.593	0	71.932	13	84.8	NaN	NaN	21.25	20.624	0
418	2009	11	4	1	43	46	734081	11	104	42	30	0.367	32	0.266	20	1	1	1	2.5	2.5	0.339	1	72.216	7	87.8	NaN	NaN	21.35	20.777	0
419	2009	11	4	1	45	50	734081	5	64	48	8	0.563	8	0.563	35598	1	3	1	2	0.5	0.001	0	77.03	7	83.8	NaN	NaN	20.7	20.302	0
420	2009	11	4	11	40	12	734081	5	32	12	10	0.5	10	0.4	202	1	1	1	1	1	0.051	1	169.893	1	172.3	NaN	NaN	20.7	19.893	0
421	2009	11	4	11	44	6	734081	6	84	46	26	0.192	12	0.458	1948	3	3	1	6.5	3	0.023	0	170.729	15	178.3	NaN	NaN	21	20.1	3
422	2009	11	4	12	17	58	734082	6.5	32	20	6	0.917	6	0.917	4	1	1	1	2	1	0.556	1	178.023	5	198	NaN	NaN	20.6	20.373	0
423	2009	11	4	12	18	34	734082	5.5	40	16	10	0.45	14	0.357	140	1	1	1	1.5	1	0.089	0	180.722	5	181.5	NaN	NaN	20.55	20.272	NaN
424	2009	11	4	12	21	34	734082	5	52	22	18	0.278	12	0.375	16	1	1	1	0.5	0.5	0.324	1	179.833	5	199	NaN	NaN	20.4	19.842	1
425	2009	11	4	12	22	42	734082	7	94	66	16	0.344	12	0.583	28	1	3	1	2.5	1.5	0.541	0	187.449	21	194.5	NaN	NaN	20.4	19.813	0
426	2009	11	4	12	24	44	734082	10	138	108	16	0.469	14	0.714	54	1	15	1	9.5	2.5	0.563	0	186.355	43	NaN	NaN	-1.9	20.4	19.689	0
427	2009	11	4	12	27	56	734082	10	120	82	18	0.556	20	0.375	22	1	15	1	9.5	3	0.577	1	188.375	25	NaN	NaN	-8.2	20.55	20.04	6
428	2009	11	4	12	30	18	734082	5	54	22	10	0.45	22	0.159	8126	1	1	1	2	1.5	0.003	0	192.146	7	195.5	NaN	NaN	20.6	20.467	NaN
429	2009	11	4	14	46	38	734082	9.5	60	0	2	4.75	58	0.164	24	1	1	1	0	0	0	0	154	1	152.8	NaN	NaN	28.6	28.75	0
430	2009	11	4	14	48	2	734082	9	56	0	8	1.125	48	0.188	12	1	1	1	0	0	0	1	154	1	152.5	NaN	NaN	28.5	28.6	0
431	2009	11	4	14	49	10	734082	9.5	36	0	30	0.317	6	1.583	78	1	1	1	0	0	0	1	153.75	1	151.5	NaN	NaN	28.4	28.5	0
432	2009	11	4	14	51	4	734082	9.5	14	0	6	1.583	8	1.188	52	1	1	1	0	0	0	1	153.25	1	151.8	NaN	NaN	28.25	28.4	0
433	2009	11	4	14	52	10	734082	9.5	32	0	30	0.317	2	4.75	84	1	1	1	0	0	0	1	152.75	1	151	NaN	NaN	28.2	28.3	0
434	2009	11	4	14	54	6	734082	9.5	20	0	4	2.375	16	0.594	NaN	1	1	1	0	0	NaN	1	153	1	151.8	NaN	NaN	28.1	28.2	0
							AVG	130.613	4.32826	1.36743	1.4427	1.26256	1.51813	1.18437	7.8929		6.06912					0.3502
							SD	108.368	2.46545	1.01678	0.935294	0.575921	0.980052	0.592688	50.9509		5.10398
							MAX	369	11.1667	5.3
							SUM		31.3078

## Sheet: SCF05_iknos_DiveStat
DiveNumber	Year	Month	Day	Hour	Min	Sec	JulDate	Maxdepth	Dduration	Botttime	DescTime	DescRate	AscTime	AscRate	PDI	DWigglesDesc	DWigglesBott	DWigglesAsc	TotVertDistBot	BottRange	Efficiency	IDZ	LightAtBott	LWiggles	LightAtSurf	Lattenuation	EuphoticDepth	TempAtSurf	TempAtBott	ThermoclineDepth
1	2009	10	29	17	14	26	734076	5.5	48	32	10	0.45	6	0.75	30	1	1	1	2	1	0.41	0	208.029	11	226.5	NaN	NaN	19.8	18.697	0
2	2009	10	29	17	15	44	734076	6.5	50	32	12	0.542	6	0.833	30	1	3	1	2.5	1.5	0.4	0	210.838	11	218.8	NaN	NaN	20.45	18.703	0
3	2009	10	29	17	17	4	734076	7	68	32	8	0.688	28	0.196	44	1	1	3	3	1.5	0.286	1	202.779	9	220	NaN	NaN	20.05	18.815	0
4	2009	10	29	17	18	56	734076	5	54	32	12	0.417	10	0.45	62	1	3	1	1.5	0.5	0.276	0	207.985	11	222	NaN	NaN	20	18.779	0
5	2009	10	29	17	20	52	734076	7	66	40	14	0.464	12	0.458	46	1	3	1	3	1.5	0.357	0	209.571	15	223.8	NaN	NaN	20.15	18.779	0
6	2009	10	29	17	22	44	734076	6.5	66	30	26	0.25	10	0.55	22	3	5	1	3	1	0.341	1	212.625	11	222.5	NaN	NaN	19.85	18.8	0
7	2009	10	29	17	24	12	734076	5	110	88	12	0.375	10	0.4	392	1	7	1	12.5	4.5	0.175	0	208.406	25	222.5	NaN	NaN	19.95	19.256	0
8	2009	10	29	17	32	34	734076	7.5	72	40	14	0.464	18	0.417	34	1	5	1	3	1	0.377	0	212.917	11	225	NaN	NaN	19.55	18.45	0
9	2009	10	29	17	34	20	734076	9.5	88	48	24	0.333	16	0.594	2	3	1	1	1.5	1.5	0.533	0	210.63	13	223	NaN	NaN	20	18.386	0
10	2009	10	29	17	35	50	734076	11	148	44	80	0.138	24	0.458	68	3	5	1	2	0.5	0.204	0	209.37	13	186.5	NaN	NaN	19.65	18.202	0
11	2009	10	29	17	39	26	734076	9.5	98	62	16	0.594	20	0.475	66	1	9	1	6	1.5	0.378	0	210.57	23	223	NaN	NaN	19.6	18.244	0
12	2009	10	29	17	42	10	734076	8.5	114	42	38	0.224	34	0.206	156	3	5	3	3.5	1.5	0.156	0	210.5	15	223	NaN	NaN	19.95	18.786	0
13	2009	10	29	17	46	40	734076	8	98	28	50	0.13	20	0.4	22	3	3	1	2.5	1.5	0.233	1	211	9	221.8	NaN	NaN	20.4	18.887	0
14	2009	10	29	17	48	40	734076	7	98	56	32	0.188	10	0.6	16	5	5	1	5	1.5	0.491	0	209.517	17	218.8	NaN	NaN	20.9	18.976	0
15	2009	10	29	17	50	34	734076	5.5	44	16	14	0.393	14	0.321	10208	1	3	1	2	1.5	0.002	0	210.417	7	220.5	NaN	NaN	20.7	19.083	0
16	2009	10	29	20	41	26	734076	5	186	34	140	0.025	12	0.417	18	15	3	1	2.5	1.5	0.167	1	215.222	11	221.3	NaN	NaN	21.35	19.3	0
17	2009	10	29	20	44	50	734076	6.5	60	36	10	0.65	14	0.464	0	1	3	1	2	1	0.6	0	209.974	11	224.5	NaN	NaN	21.1	18.563	0
18	2009	10	29	20	45	50	734076	10.5	184	98	64	0.141	22	0.477	4	13	13	3	10.5	2.5	0.521	0	207.515	37	220	NaN	NaN	20.8	18.278	1
19	2009	10	29	20	48	58	734076	11	494	222	102	0.103	170	0.047	52398	15	23	11	31.5	10	0.004	1	210.397	73	NaN	NaN	4.4	19.35	18.771	NaN
20	2009	10	30	11	30	30	734076	6.5	108	82	8	0.625	18	0.278	68	1	3	1	4	1.5	0.466	0	154.196	29	168.8	NaN	NaN	20.2	18.336	0
21	2009	10	30	11	33	26	734076	5	108	42	12	0.417	54	0.065	324	1	1	3	1.5	1.5	0.097	0	160.489	15	169	NaN	NaN	20.5	18.202	0
22	2009	10	30	11	40	38	734076	14.5	126	14	90	0.128	22	0.659	1518	5	3	1	4	3.5	0.009	0	165.031	3	172.3	NaN	NaN	20	17.319	0
23	2009	10	30	12	8	2	734077	17	124	46	42	0.31	36	0.431	422	1	7	1	11.5	4.5	0.084	0	176.438	11	187.7	-0.8	6.9	24	18.771	0
24	2009	10	30	12	17	8	734077	13	68	16	16	0.75	36	0.361	414	1	3	1	2	1.5	0.033	0	177.25	7	NaN	NaN	-24.6	24.1	19.011	0
25	2009	10	30	12	25	10	734077	13.5	120	56	34	0.397	30	0.433	210	1	3	1	1.5	0.5	0.17	1	188.836	17	183	0.667	7.7	24.15	17.926	2
26	2009	10	30	12	30	40	734077	149.5	390	126	134	1.052	130	1.138	314	1	3	1	11	8.5	0.179	0	123.707	39	NaN	NaN	0.7	24.1	14.802	0
27	2009	10	30	12	42	24	734077	189.5	438	158	130	1.408	150	1.263	114	1	13	1	21.5	6.5	0.286	0	110.912	45	NaN	NaN	1.2	24	13.8	0
28	2009	10	30	12	51	36	734077	205.5	428	162	122	1.537	144	1.427	132	1	9	1	28.5	18	0.289	1	109.851	43	NaN	NaN	0.2	23.8	13.744	0
29	2009	10	30	13	0	56	734077	246	484	182	138	1.634	164	1.5	258	1	9	1	25.5	20.5	0.245	0	95.293	57	NaN	NaN	2.8	23.65	13.597	0
30	2009	10	30	13	13	18	734077	255.5	466	174	140	1.757	152	1.668	234	1	17	1	28.5	9.5	0.249	1	93.625	51	NaN	NaN	4.1	23.7	13.189	0
31	2009	10	30	13	24	58	734077	280	446	146	140	1.986	160	1.722	2020	1	13	1	17.5	7.5	0.059	1	85.493	39	NaN	NaN	3.8	23.65	12.042	0
32	2009	10	30	14	6	4	734077	369.5	588	198	178	2.065	212	1.741	444	1	15	1	14.5	2.5	0.192	0	48.297	25	NaN	NaN	3.1	23.85	10.547	0
33	2009	10	30	14	23	16	734077	395	552	150	182	2.151	220	1.795	2762	1	11	1	10.5	3.5	0.045	1	43.615	11	183.7	-0.875	7	23.7	10.08	0
34	2009	10	30	15	18	30	734077	448	502	12	214	2.054	276	1.621	576	1	1	1	9	8.5	0.011	0	41.107	1	NaN	NaN	1.3	23.9	9.721	0
35	2009	10	30	15	36	28	734077	318.5	496	178	160	1.991	158	1.674	208	1	5	1	57	54	0.253	0	75.392	35	NaN	NaN	3.2	23.75	12.818	0
36	2009	10	30	15	48	12	734077	272	410	106	140	1.943	164	1.64	298	1	15	1	28	4.5	0.15	0	88.921	29	NaN	NaN	5.2	23.65	12.903	0
37	2009	10	30	16	0	0	734077	271.5	434	118	152	1.786	164	1.649	244	1	7	1	17.5	6	0.174	1	90.821	35	NaN	NaN	5.3	23.7	12.882	0
38	2009	10	30	16	11	18	734077	269	442	154	138	1.859	150	1.7	436	1	17	1	56.5	15	0.175	1	97.179	47	207.1	-0.239	7.2	23.7	12.862	0
39	2009	10	30	16	25	56	734077	305	422	154	130	1.938	138	1.609	680	1	5	1	138	83	0.14	0	90.272	45	186.5	-0.668	6	23.8	12.915	0
40	2009	10	30	16	44	18	734077	300.5	420	100	138	2.116	182	1.651	1074	1	9	1	18.5	8.5	0.067	1	89.608	33	NaN	NaN	2.1	23.9	12.468	0
41	2009	10	30	17	9	12	734077	283	434	122	152	1.842	160	1.541	2860	1	3	1	44.5	38	0.037	1	106.258	29	NaN	NaN	1.4	24.05	12.889	0
42	2009	10	30	18	4	6	734077	7.5	72	18	40	0.138	14	0.429	5568	1	1	1	3.5	2	0.003	0	217.5	7	216.5	NaN	NaN	24.05	22.725	0
43	2009	10	30	19	38	6	734077	253.5	378	82	136	1.665	160	1.584	1458	1	3	1	28	27.5	0.045	0	109.119	25	NaN	NaN	3.7	24.25	13.22	0
44	2009	10	30	20	8	42	734077	249.5	402	134	120	2.025	148	1.686	414	1	11	1	18	6	0.164	1	103.629	49	NaN	NaN	3.6	24.1	13.176	0
45	2009	10	30	20	22	18	734077	310	454	134	136	2.07	184	1.685	398	1	7	1	32.5	29.5	0.157	0	82.529	37	NaN	NaN	3.4	24.1	11.815	0
46	2009	10	30	20	36	30	734077	289.5	506	186	146	1.849	174	1.661	238	1	9	1	36	24.5	0.25	1	90.082	53	NaN	NaN	4.8	24.05	12.335	0
47	2009	10	30	20	48	54	734077	299	458	146	150	1.973	162	1.784	244	1	5	1	18	11.5	0.208	1	84.52	41	NaN	NaN	3.9	24.1	12.343	0
48	2009	10	30	21	0	36	734077	315.5	538	206	150	2.03	182	1.731	368	1	9	1	30.5	16	0.227	1	78.846	57	NaN	NaN	4.9	24.05	11.756	0
49	2009	10	30	21	15	42	734077	321	486	142	158	2.032	186	1.696	402	1	7	1	13.5	6.5	0.16	1	72.639	31	NaN	NaN	5	24	11.401	0
50	2009	10	30	21	30	30	734077	316	484	142	152	2.039	190	1.637	796	1	3	1	13	6	0.111	1	75.16	27	NaN	NaN	5.6	24.1	11.29	0
51	2009	10	30	21	51	50	734077	300.5	488	166	156	1.926	166	1.684	1018	1	7	1	46	23	0.11	1	83.545	41	189.7	-2.439	6.2	24.1	12.558	1
52	2009	10	30	22	16	56	734077	167	334	130	98	1.597	106	1.259	298	1	21	3	76	34.5	0.206	0	114.322	47	161.7	0.397	7.6	24.15	14.386	0
53	2009	10	30	22	27	28	734077	263	414	122	132	1.898	160	1.625	228	1	5	1	17.5	12.5	0.19	0	87.899	35	193.3	-0.407	9.6	24.05	12.809	0
54	2009	10	30	22	38	10	734077	299	474	154	154	1.942	166	1.684	302	1	9	1	61.5	32.5	0.198	0	77	33	NaN	NaN	4.9	24	12.429	0
55	2009	10	30	22	51	6	734077	298	452	130	156	1.901	166	1.765	256	1	7	1	58.5	23.5	0.184	1	71.174	25	171.6	0.832	9.9	24.05	12.566	0
56	2009	10	30	23	2	54	734077	142	318	154	68	1.728	96	1.432	90	1	17	1	83	38.5	0.377	0	115.003	51	NaN	NaN	3.5	23.95	14.924	0
57	2009	10	30	23	9	42	734077	127	296	150	72	1.764	74	1.642	94	1	31	1	79.5	13.5	0.385	0	118.072	51	184.6	-0.328	8.9	23.8	14.995	0
58	2009	10	30	23	16	12	734077	138	320	174	66	1.742	80	1.638	100	1	25	1	60	25	0.414	1	112.074	61	NaN	NaN	5.9	23.8	14.885	0
59	2009	10	30	23	23	12	734077	123.5	296	166	72	1.715	58	1.638	88	1	17	1	75.5	29	0.432	0	117.125	57	NaN	NaN	5.4	23.75	15.466	0
60	2009	10	30	23	29	36	734077	109	288	172	56	1.813	60	1.658	78	1	31	1	71	15	0.47	0	112.121	61	177.1	-0.459	8.1	23.75	15.47	2
61	2009	10	30	23	35	42	734077	97	262	164	52	1.731	46	1.576	60	1	15	1	68.5	24.5	0.509	0	115.904	61	NaN	NaN	5.2	23.7	15.725	1
62	2009	10	30	23	41	4	734077	89.5	250	154	44	1.784	52	1.308	62	1	27	1	65.5	21.5	0.494	1	113.641	55	157.7	-2.613	9.6	23.75	15.896	2
63	2009	10	30	23	46	16	734077	74.5	282	202	42	1.774	38	1.645	70	1	35	1	109	26	0.574	0	120.11	69	172.8	NaN	NaN	23.7	16.566	0
64	2009	10	30	23	52	8	734077	64.5	266	176	28	1.643	62	0.79	68	1	25	3	86	29	0.527	0	114.25	65	166	NaN	NaN	23.75	16.904	0
65	2009	10	30	23	57	42	734077	55.5	196	132	26	1.769	38	1.382	48	1	15	1	79.5	28.5	0.541	0	115.646	43	125.5	NaN	NaN	23.75	17.246	0
66	2009	10	31	0	1	46	734077	41.5	240	162	42	0.857	36	0.819	56	3	25	7	61.5	12	0.547	0	105.738	59	146	NaN	NaN	23.7	17.289	0
67	2009	10	31	0	6	42	734077	34.5	148	86	18	1.611	44	0.648	42	1	21	1	37.5	7.5	0.453	0	101.051	31	115.3	NaN	NaN	23.75	17.484	0
68	2009	10	31	0	9	52	734077	36	214	90	26	1.365	98	0.276	58	1	21	15	50.5	10	0.331	1	94.103	29	115.5	NaN	NaN	23.75	17.428	5
69	2009	10	31	0	14	24	734077	28	184	134	16	1.438	34	0.588	74	1	13	5	51	12	0.519	0	94.794	41	95.3	NaN	NaN	23.85	18.149	0
70	2009	10	31	0	18	42	734077	21	84	38	18	1.139	28	0.536	360	1	3	1	12.5	6	0.086	0	92.162	9	108.5	NaN	NaN	23.75	18.795	3
71	2009	10	31	0	26	6	734077	6.5	34	8	10	0.65	16	0.375	474	1	1	1	0.5	0.5	0.016	0	89.2	1	78.8	NaN	NaN	24	23.95	NaN
72	2009	10	31	0	34	34	734077	192	336	104	118	1.597	114	1.645	192	1	15	1	27	6.5	0.197	0	32.783	1	98.8	NaN	NaN	24	14.14	0
73	2009	10	31	0	43	22	734077	199.5	364	134	122	1.574	108	1.727	170	1	17	1	48.5	13.5	0.251	1	31.265	5	90	NaN	NaN	23.9	13.99	0
74	2009	10	31	0	52	16	734077	10	62	16	26	0.327	20	0.45	222	1	3	1	4.5	1.5	0.056	0	84.278	5	100.3	NaN	NaN	23.8	21.722	3
75	2009	10	31	0	57	0	734077	14	80	32	22	0.636	26	0.481	56	1	3	1	2.5	2	0.235	0	85.206	11	101.3	NaN	NaN	23.85	20.559	6
76	2009	10	31	0	59	16	734077	15.5	86	44	22	0.636	20	0.6	44	1	5	1	8	3.5	0.338	0	85.141	9	101.3	NaN	NaN	23.85	20.75	3
77	2009	10	31	1	1	26	734077	15.5	80	30	22	0.636	28	0.482	116	1	1	1	3.5	2	0.153	1	84.563	9	97.5	NaN	NaN	23.85	20.053	2
78	2009	10	31	1	4	42	734077	169.5	334	130	118	1.386	86	1.797	98	1	13	1	77	34.5	0.301	0	32.955	3	80.3	NaN	NaN	23.9	14.755	0
79	2009	10	31	1	11	54	734077	166	298	118	94	1.723	86	1.727	222	1	15	1	45.5	18	0.227	1	32.554	1	83.3	NaN	NaN	23.7	14.643	1
80	2009	10	31	1	20	34	734077	180	348	132	110	1.591	106	1.519	180	1	7	1	37	21.5	0.25	1	31.59	1	89.3	NaN	NaN	23.75	14.275	2
81	2009	10	31	1	29	22	734077	177	340	152	100	1.665	88	1.795	134	1	21	1	58.5	19	0.321	1	32.253	3	95	NaN	NaN	23.8	14.3	0
82	2009	10	31	1	37	16	734077	183.5	342	164	90	1.722	88	1.778	130	1	15	1	86.5	29.5	0.347	1	32.235	5	98	NaN	NaN	23.7	14.405	2
83	2009	10	31	1	45	8	734077	182.5	334	164	90	1.75	80	1.794	134	1	19	1	94	39	0.35	1	31.934	7	95.3	NaN	NaN	23.7	14.552	0
84	2009	10	31	1	52	56	734077	157.5	320	160	82	1.774	78	1.776	120	1	27	1	67	19	0.364	0	32.812	7	74.5	NaN	NaN	23.65	14.552	0
85	2009	10	31	2	0	16	734077	168	332	158	88	1.693	86	1.703	130	1	15	1	81.5	21.5	0.342	1	31.816	1	76	NaN	NaN	23.6	14.532	0
86	2009	10	31	2	7	58	734077	187.5	360	158	86	1.709	116	1.547	170	1	15	1	87.5	40.5	0.298	0	32.022	1	98.5	NaN	NaN	23.6	14.697	0
87	2009	10	31	2	16	48	734077	175.5	366	178	88	1.813	100	1.755	158	1	17	1	72	19.5	0.34	1	31.528	1	96.8	NaN	NaN	23.65	14.246	0
88	2009	10	31	2	25	32	734077	158	344	166	94	1.681	84	1.762	118	1	21	1	36	12.5	0.359	1	32.455	7	87.3	NaN	NaN	23.65	14.807	0
89	2009	10	31	2	33	14	734077	155	340	170	84	1.804	86	1.785	130	1	13	1	14	4	0.362	1	32.183	1	93.5	NaN	NaN	23.6	14.48	0
90	2009	10	31	2	41	4	734077	152.5	332	170	84	1.774	78	1.635	166	1	13	1	40.5	25	0.341	1	32.442	3	92.3	NaN	NaN	23.6	14.498	1
91	2009	10	31	2	49	22	734077	177.5	320	126	100	1.585	94	1.617	124	1	11	1	77.5	25.5	0.284	0	32.508	1	88.8	NaN	NaN	23.65	14.959	0
92	2009	10	31	2	56	46	734077	154.5	350	170	90	1.717	90	1.633	118	1	19	1	23.5	7.5	0.363	0	37.552	5	84.3	NaN	NaN	23.6	14.725	0
93	2009	10	31	3	4	34	734077	153.5	338	158	90	1.694	90	1.678	152	1	15	1	28.5	5	0.322	1	32.413	3	96.3	NaN	NaN	23.7	14.946	0
94	2009	10	31	3	12	44	734077	151.5	324	152	88	1.722	84	1.78	148	1	15	1	20	5	0.322	1	32.633	1	93	NaN	NaN	23.7	14.964	0
95	2009	10	31	3	20	36	734077	153.5	328	154	84	1.798	90	1.706	140	1	15	1	16.5	3.5	0.329	1	32.702	3	89.5	NaN	NaN	23.65	14.721	2
96	2009	10	31	3	28	24	734077	152	300	124	84	1.78	92	1.641	134	1	9	1	13.5	4	0.286	1	33.23	1	96.5	NaN	NaN	23.6	14.478	0
97	2009	10	31	3	35	38	734077	152.5	320	142	86	1.767	92	1.63	126	1	29	1	38	4.5	0.318	1	32.757	1	99.8	NaN	NaN	23.5	14.161	0
98	2009	10	31	3	43	4	734077	179	306	118	86	1.826	102	1.559	6060	1	7	1	48	23.5	0.019	0	33.008	1	87.8	NaN	NaN	23.5	14.991	0
99	2009	10	31	5	29	10	734077	8.5	48	10	26	0.327	12	0.5	834	1	1	1	2.5	2.5	0.011	0	84.25	3	88.3	NaN	NaN	23.8	23.217	2
100	2009	10	31	5	43	52	734077	25	88	16	30	0.833	42	0.464	42	1	3	1	6.5	6	0.123	0	73.083	3	77.3	NaN	NaN	23.8	18.1	1
101	2009	10	31	5	46	2	734077	5.5	18	4	6	0.75	8	0.625	630	1	1	1	1.5	1	0.006	0	82.833	1	87.3	NaN	NaN	23.7	23.7	NaN
102	2009	10	31	5	56	50	734077	8.5	60	18	28	0.25	14	0.5	1808	1	1	1	3	1.5	0.01	0	82.15	3	86.8	NaN	NaN	23.8	23.6	4
103	2009	10	31	6	27	58	734077	13.5	68	30	18	0.75	20	0.5	210	1	1	1	3.5	3.5	0.108	0	81.281	7	96.3	NaN	NaN	23.75	20.138	3
104	2009	10	31	6	32	36	734077	26	112	16	66	0.394	30	0.75	96	1	3	1	5.5	3.5	0.077	0	74.111	3	88.8	NaN	NaN	23.75	17.844	2
105	2009	10	31	6	36	4	734077	6.5	62	20	32	0.172	10	0.55	238	1	3	1	3	1.5	0.067	0	84.636	7	88.5	NaN	NaN	23.7	22.932	2
106	2009	10	31	6	41	4	734077	13	92	22	26	0.481	44	0.216	784	1	1	3	4	3.5	0.025	0	79.458	3	94.8	NaN	NaN	23.7	20.363	1
107	2009	10	31	6	55	40	734077	6.5	66	22	30	0.183	14	0.357	108	1	1	3	2.5	1.5	0.126	0	81.771	5	83.3	NaN	NaN	23.7	22.042	1
108	2009	10	31	6	58	34	734077	239.5	444	150	156	1.535	138	1.667	222	1	9	1	23.5	14	0.225	0	32.306	1	80.5	NaN	NaN	23.7	13.697	0
109	2009	10	31	7	9	40	734077	232.5	490	238	118	1.941	134	1.713	212	1	21	1	27	5	0.339	1	29.156	3	84.8	NaN	NaN	23.55	13.693	2
110	2009	10	31	7	21	22	734077	218	486	246	116	1.853	124	1.73	156	1	21	1	21	5	0.383	1	28.502	3	73	NaN	NaN	23.5	13.744	0
111	2009	10	31	7	32	4	734077	215	446	214	112	1.911	120	1.792	162	1	19	1	12	2	0.352	1	29.037	3	82.3	NaN	NaN	23.45	13.64	0
112	2009	10	31	7	42	12	734077	216.5	464	230	112	1.924	122	1.766	168	1	25	1	20	2.5	0.364	1	29.075	3	79.8	NaN	NaN	23.4	13.628	0
113	2009	10	31	7	52	44	734077	217.5	464	230	112	1.915	122	1.779	192	1	9	1	9	3	0.351	1	28.129	1	69.5	NaN	NaN	23.4	13.651	0
114	2009	10	31	8	3	40	734077	203	344	118	108	1.87	118	1.712	168	1	17	1	13	2	0.23	1	31.983	1	79	NaN	NaN	23.4	13.752	0
115	2009	10	31	8	12	12	734077	206	368	150	104	1.957	114	1.803	212	1	15	1	12	2.5	0.259	1	30.47	1	74	NaN	NaN	23.45	13.693	0
116	2009	10	31	8	21	52	734077	210	382	158	110	1.873	114	1.842	182	1	11	1	13	6	0.28	1	30.175	1	80.3	NaN	NaN	23.4	13.706	0
117	2009	10	31	8	31	16	734077	205.5	352	132	108	1.889	112	1.83	188	1	5	1	5	1.5	0.244	1	30.735	1	73.5	NaN	NaN	23.4	13.713	1
118	2009	10	31	8	40	16	734077	202.5	384	162	104	1.938	118	1.716	258	1	11	1	10	2	0.252	1	30.174	1	72.5	NaN	NaN	23.4	13.76	0
119	2009	10	31	8	50	58	734077	200	380	162	102	1.922	116	1.724	628	1	11	1	11	4	0.161	1	30.326	3	68.5	NaN	NaN	23.45	13.796	0
120	2009	10	31	9	7	46	734077	5.5	34	16	10	0.5	8	0.563	46	1	3	1	2.5	1.5	0.2	0	56.639	3	58.3	NaN	NaN	23.55	23.411	2
121	2009	10	31	9	9	6	734077	8.5	60	18	20	0.375	22	0.318	110	1	1	1	2.5	1.5	0.106	0	54.65	1	64	NaN	NaN	23.55	22.055	2
122	2009	10	31	9	11	56	734077	217.5	444	222	114	1.842	108	1.824	224	1	11	1	41	23.5	0.332	0	34.261	3	67.8	NaN	NaN	23.55	13.842	0
123	2009	10	31	9	23	4	734077	197	410	198	102	1.907	110	1.791	270	1	13	1	9.5	2.5	0.291	1	29.898	1	60.8	NaN	NaN	23.45	13.822	0
124	2009	10	31	9	34	24	734077	192.5	382	174	106	1.811	102	1.672	364	1	11	1	31.5	23	0.233	1	30.33	1	57.3	NaN	NaN	23.45	14.027	0
125	2009	10	31	9	46	50	734077	188	318	98	100	1.865	120	1.55	348	1	5	1	8.5	2	0.147	1	32.76	1	55.3	NaN	NaN	23.45	14.219	0
126	2009	10	31	9	57	56	734077	202	416	202	104	1.875	110	1.8	1288	1	9	1	16	7	0.119	1	36.37	5	53.8	NaN	NaN	23.45	13.662	0
127	2009	10	31	10	26	20	734077	6.5	40	22	6	0.917	12	0.542	1356	1	3	1	4	2.5	0.016	0	49.667	3	48.5	NaN	NaN	23.5	22.896	NaN
128	2009	10	31	10	49	36	734077	9.5	70	50	10	0.95	10	0.7	116	1	5	1	11.5	5.5	0.269	0	50.875	7	55.8	NaN	NaN	23.5	21.238	1
129	2009	10	31	10	52	42	734077	30	70	10	22	1.364	38	0.711	426	1	3	5	5	4	0.02	0	45.292	1	64.3	NaN	NaN	23.5	17.75	0
130	2009	10	31	11	0	58	734077	15.5	66	14	24	0.646	28	0.464	646	1	1	1	2.5	2.5	0.02	0	69.375	3	80	NaN	NaN	23.5	18.269	1
131	2009	10	31	11	12	50	734077	188	338	120	104	1.793	114	1.649	146	1	11	1	6.5	2	0.248	0	34.619	3	82.8	NaN	NaN	23.5	14.542	0
132	2009	10	31	11	20	54	734077	22	80	8	40	0.55	32	0.641	78	1	1	1	1.5	1.5	0.051	0	115.35	3	128.3	NaN	NaN	23.3	17.72	1
133	2009	10	31	11	23	32	734077	190.5	348	124	108	1.755	116	1.634	260	1	13	1	11	2	0.204	0	45.603	15	121.8	NaN	NaN	23.3	14.487	0
134	2009	10	31	11	33	40	734077	187.5	368	150	108	1.731	110	1.659	258	1	7	1	13.5	5	0.24	1	68.829	29	155.8	NaN	NaN	23.3	14.461	0
135	2009	10	31	11	44	6	734077	187.5	356	130	104	1.745	122	1.529	1244	1	5	1	10	6	0.081	1	81.053	31	162.8	NaN	NaN	23.3	14.261	0
136	2009	10	31	12	10	46	734078	218	362	76	132	1.633	154	1.416	1436	1	5	1	8.5	3	0.042	0	84.827	23	181.8	NaN	NaN	23.3	13.819	1
137	2009	10	31	12	40	44	734078	195.5	356	74	128	1.523	154	1.269	2306	1	13	1	13.5	1.5	0.028	0	101.566	23	NaN	NaN	-3.2	23.2	14.233	1
138	2009	10	31	13	25	6	734078	188.5	354	124	104	1.798	126	1.496	166	1	7	1	4.5	2	0.238	1	113.571	39	NaN	NaN	0.7	23.2	14.445	0
139	2009	10	31	13	33	46	734078	192.5	406	190	104	1.837	112	1.714	242	1	5	1	5	1.5	0.293	1	112.094	51	NaN	NaN	3.7	23.1	14.337	0
140	2009	10	31	13	44	34	734078	194	394	150	116	1.655	128	1.516	156	1	11	1	7	2.5	0.273	1	113.938	53	NaN	NaN	-4.3	23.1	14.283	0
141	2009	10	31	13	53	44	734078	196.5	402	162	112	1.741	128	1.531	160	1	11	1	12	2.5	0.288	1	111.726	47	NaN	NaN	-2.2	23.1	14.271	2
142	2009	10	31	14	3	6	734078	198.5	426	198	108	1.806	120	1.65	1248	1	17	1	13	3.5	0.118	1	112.395	61	NaN	NaN	2.2	23	14.091	0
143	2009	10	31	14	31	0	734078	215.5	370	64	148	1.446	158	1.364	1684	1	5	1	3.5	2	0.031	1	111.462	17	NaN	NaN	-1.3	23.3	13.979	0
144	2009	10	31	15	5	14	734078	307.5	450	114	158	1.94	178	1.722	5256	1	9	1	8	2	0.02	0	81.56	33	NaN	NaN	4.5	23.35	11.934	0
145	2009	10	31	16	40	20	734078	319	476	134	154	2.065	188	1.691	1336	1	17	1	17	3	0.074	1	81.199	33	NaN	NaN	-3.4	23.65	11.688	0
146	2009	10	31	17	10	32	734078	286	450	150	124	1.843	176	1.611	142	1	11	1	78	59	0.253	0	96.266	45	NaN	NaN	0.8	23.7	12.153	1
147	2009	10	31	17	20	24	734078	286	482	174	148	1.932	160	1.75	190	1	9	1	13	6.5	0.259	1	95.866	53	NaN	NaN	5.9	23.45	11.795	0
148	2009	10	31	17	31	36	734078	271	472	174	144	1.868	154	1.747	736	1	23	1	24	2	0.144	1	98.48	49	NaN	NaN	4.6	23.5	12.152	0
149	2009	10	31	17	51	44	734078	333	502	146	158	2.085	198	1.659	2998	1	11	1	21	5	0.042	0	69.274	31	NaN	NaN	5.4	23.6	11.34	0
150	2009	10	31	18	50	4	734078	8.5	38	2	6	1.417	30	0.283	108	1	1	1	0	0	0.014	0	191.625	1	182.5	NaN	NaN	23.7	22.7	1
151	2009	10	31	18	52	30	734078	271.5	458	166	134	1.996	158	1.718	136	1	15	1	16	5.5	0.279	0	98.631	57	NaN	NaN	-2.2	23.65	12.142	0
152	2009	10	31	19	2	24	734078	268.5	502	174	142	1.877	186	1.441	2186	1	13	1	10.5	2	0.065	1	97.511	47	NaN	NaN	5.1	23.4	12.108	0
153	2009	10	31	19	47	12	734078	250	486	206	144	1.736	136	1.673	792	1	5	1	24.5	22.5	0.161	1	101.613	57	NaN	NaN	-2.4	23.35	13.661	1
154	2009	10	31	20	8	30	734078	223	440	174	118	1.881	148	1.503	938	1	7	1	7.5	2	0.126	0	108.088	55	NaN	NaN	4.9	23.7	13.533	0
155	2009	10	31	20	31	28	734078	242.5	376	98	124	1.931	154	1.575	960	1	7	1	8	4	0.073	1	97.66	25	NaN	NaN	2.2	23.8	13.25	0
156	2009	10	31	20	53	44	734078	289	414	70	166	1.729	178	1.618	916	1	7	1	6	2	0.053	0	77.674	23	NaN	NaN	-3.1	23.9	11.675	0
157	2009	10	31	21	15	54	734078	278	444	96	168	1.643	180	1.542	444	1	7	1	6.5	2	0.108	1	82.031	25	NaN	NaN	4	23.75	11.731	0
158	2009	10	31	21	30	42	734078	281	452	114	154	1.812	184	1.527	382	1	11	1	6.5	2	0.137	1	75.905	31	NaN	NaN	4.5	23.75	11.725	0
159	2009	10	31	21	44	36	734078	285.5	448	114	152	1.859	182	1.569	268	1	9	1	7	3.5	0.159	1	74.53	33	NaN	NaN	-2.3	23.65	11.736	0
160	2009	10	31	21	56	32	734078	288	450	118	146	1.955	186	1.548	142	1	17	1	12	2.5	0.199	1	72.229	29	NaN	NaN	2.4	23.45	11.81	0
161	2009	10	31	22	6	24	734078	5.5	60	8	28	0.161	24	0.188	322	1	1	1	2	1	0.021	0	197.55	1	207	NaN	NaN	23.25	21.5	0
162	2009	10	31	22	12	46	734078	298	466	118	162	1.815	186	1.602	112	1	9	1	10	4.5	0.204	0	68.279	25	NaN	NaN	4	23.3	12.087	0
163	2009	10	31	22	22	24	734078	5	54	24	22	0.182	8	0.438	170	1	1	1	2.5	1.5	0.107	0	197.25	11	209.8	NaN	NaN	22.9	21.054	0
164	2009	10	31	22	26	8	734078	296.5	420	84	160	1.841	176	1.685	442	1	11	1	12	2	0.097	0	64.471	19	NaN	NaN	2.6	22.95	12.24	0
165	2009	10	31	22	40	30	734078	285	434	110	152	1.862	172	1.651	156	1	13	1	18	2	0.186	1	68.415	21	NaN	NaN	-2.9	23.2	12.766	0
166	2009	10	31	22	50	20	734078	6	58	24	22	0.273	12	0.375	264	1	1	1	1.5	1.5	0.075	0	192.865	9	213.5	NaN	NaN	23.35	22.173	1
167	2009	10	31	22	55	42	734078	140.5	356	198	86	1.634	72	1.819	100	1	33	1	93.5	14.5	0.434	0	110.628	67	NaN	NaN	1	23.4	15.077	0
168	2009	10	31	23	3	18	734078	144	326	170	78	1.763	78	1.66	90	1	25	1	78	17.5	0.409	1	111.82	57	198.9	-0.177	6.3	23.25	14.67	0
169	2009	10	31	23	10	14	734078	153	324	166	66	1.848	92	1.641	92	1	27	1	72	33	0.399	1	104.018	53	NaN	NaN	2.3	23.2	14.43	0
170	2009	10	31	23	17	10	734078	138	298	162	64	1.805	72	1.646	70	1	19	1	76	22.5	0.44	1	109.058	51	NaN	NaN	5	23.15	14.802	0
171	2009	10	31	23	23	18	734078	135.5	296	140	74	1.662	82	1.61	74	1	17	1	66	25	0.378	1	106.556	51	NaN	NaN	0.5	23.1	14.803	0
172	2009	10	31	23	29	28	734078	113.5	272	178	46	1.891	48	1.844	68	1	23	1	100.5	32.5	0.524	0	111.217	59	NaN	NaN	3.1	23.1	15.666	0
173	2009	10	31	23	35	8	734078	123.5	262	152	54	1.704	56	1.813	62	1	23	1	73.5	33.5	0.469	1	105.016	45	161.9	-2.376	7.4	23.1	15.43	0
174	2009	10	31	23	40	32	734078	90.5	240	152	48	1.781	40	1.6	56	1	27	1	62.5	27.5	0.514	0	114.481	51	NaN	NaN	4.5	23	15.964	3
175	2009	10	31	23	45	28	734078	94.5	258	182	38	1.974	38	1.882	64	1	23	1	69.5	23	0.565	1	106.299	63	169	NaN	NaN	22.95	15.896	0
176	2009	10	31	23	50	50	734078	73.5	232	152	42	1.595	38	1.5	56	1	17	3	44	16.5	0.528	0	107.286	53	167.3	NaN	NaN	23	16.165	0
177	2009	10	31	23	55	38	734078	58	204	148	28	1.696	28	1.786	54	1	23	1	49.5	11.5	0.574	0	106.573	55	162.8	NaN	NaN	22.55	16.434	0
178	2009	10	31	23	59	56	734078	57.5	202	116	62	0.831	24	1.75	54	7	19	1	42.5	15.5	0.453	1	101.076	41	151.8	NaN	NaN	22.9	16.74	0
179	2009	11	1	0	4	12	734078	36	144	98	22	1.159	24	1.479	34	1	19	1	36	12	0.551	0	104.93	35	137.5	NaN	NaN	23	17.756	0
180	2009	11	1	0	7	10	734078	33	146	72	26	0.904	48	0.552	36	3	5	7	50	22.5	0.396	1	106.885	23	128	NaN	NaN	22.8	19.324	0
181	2009	11	1	0	10	12	734078	38	152	70	46	0.826	36	0.847	42	3	15	1	40.5	15.5	0.361	0	92.292	21	116.5	NaN	NaN	22.95	18.757	0
182	2009	11	1	0	13	26	734078	45	156	104	26	1.365	26	1.269	34	1	7	1	83.5	30	0.547	0	88.127	29	116.3	NaN	NaN	22.85	18.894	0
183	2009	11	1	0	16	36	734078	30.5	156	56	24	1.271	76	0.342	42	1	9	11	29.5	10.5	0.283	0	84.776	17	114.8	NaN	NaN	22.9	19.247	0
184	2009	11	1	0	19	54	734078	22.5	86	42	20	1.125	24	0.688	24	1	5	3	14	9	0.382	0	91.284	13	110.5	NaN	NaN	23.1	19.845	0
185	2009	11	1	0	21	44	734078	26.5	118	4	30	0.867	84	0.315	28	1	1	5	0.5	0.5	0.027	0	81.333	1	107	NaN	NaN	23	19.067	1
186	2009	11	1	0	24	10	734078	53	150	6	56	0.946	88	0.591	38	1	3	1	2	1.5	0.032	0	62.188	1	109.3	NaN	NaN	23.05	16.7	0
187	2009	11	1	0	27	18	734078	20.5	122	52	32	0.641	38	0.421	46	1	3	1	5.5	4.5	0.31	0	81.63	15	104.8	NaN	NaN	23	19.811	1
188	2009	11	1	0	30	6	734078	13	88	34	22	0.568	32	0.297	54	1	1	1	4	3.5	0.239	0	83.514	11	92	NaN	NaN	23.1	20.608	1
189	2009	11	1	0	32	28	734078	8.5	104	62	22	0.341	20	0.325	42	1	3	1	5	2	0.425	0	83.789	23	93.8	NaN	NaN	23.2	21.328	2
190	2009	11	1	0	34	54	734078	15.5	118	70	22	0.636	26	0.462	56	1	5	1	7	3.5	0.402	0	80.333	17	99.8	NaN	NaN	23.2	19.626	1
191	2009	11	1	0	37	48	734078	17	140	90	28	0.589	22	0.568	64	1	5	1	7	4.5	0.441	1	81.266	17	93	NaN	NaN	23.15	19.927	5
192	2009	11	1	0	41	12	734078	18	128	82	20	0.65	26	0.615	50	1	3	1	8	5	0.461	1	81.065	19	103.3	NaN	NaN	23.1	20.733	1
193	2009	11	1	0	44	10	734078	15.5	120	74	16	0.719	30	0.417	46	1	5	1	9	4	0.446	0	82.895	21	103.8	NaN	NaN	23.1	19.943	1
194	2009	11	1	0	46	56	734078	18.5	122	54	34	0.515	34	0.426	64	1	1	1	5	4	0.29	0	81.116	11	98	NaN	NaN	23.1	20.27	4
195	2009	11	1	0	50	2	734078	19	150	94	20	0.7	36	0.472	52	1	9	1	12	5	0.465	1	82.177	31	95.5	NaN	NaN	23.1	20.036	2
196	2009	11	1	0	53	24	734078	25.5	158	88	28	0.661	42	0.5	156	1	9	1	19.5	7	0.28	0	78.011	23	96	NaN	NaN	23.2	19.719	3
197	2009	11	1	0	58	38	734078	210	386	126	110	1.909	150	1.39	124	1	9	1	24	6.5	0.247	0	36.172	1	77.8	NaN	NaN	23.2	13.587	3
198	2009	11	1	1	7	8	734078	17	106	54	26	0.538	26	0.462	86	1	3	1	9	5	0.281	0	80.777	11	90	NaN	NaN	23	21.268	1
199	2009	11	1	1	10	20	734078	15.5	72	24	22	0.659	26	0.5	94	1	3	1	4.5	2.5	0.145	1	81.096	3	97.3	NaN	NaN	23.05	21.588	3
200	2009	11	1	1	13	6	734078	231.5	422	162	124	1.843	136	1.544	110	1	11	1	33.5	23	0.305	0	30.527	3	69.8	NaN	NaN	23.05	13.384	0
201	2009	11	1	1	21	58	734078	165.5	358	182	88	1.824	88	1.682	96	1	15	1	46.5	18	0.401	0	30.856	1	79.8	NaN	NaN	22.8	14.198	0
202	2009	11	1	1	29	32	734078	153	310	150	76	1.928	84	1.685	92	1	15	1	37	11.5	0.373	1	32.523	1	93	NaN	NaN	22.75	14.187	0
203	2009	11	1	1	36	14	734078	149	278	108	80	1.831	90	1.611	98	1	9	1	14.5	4.5	0.287	1	33.255	3	99	NaN	NaN	22.65	14.2	0
204	2009	11	1	1	42	30	734078	167.5	320	150	84	1.982	86	1.703	100	1	11	1	41	21.5	0.357	0	31.602	3	94.8	NaN	NaN	22.7	14.165	0
205	2009	11	1	1	49	30	734078	151.5	328	186	60	1.792	82	1.829	116	1	25	1	71	45.5	0.419	1	32.641	3	95.5	NaN	NaN	22.7	14.272	0
206	2009	11	1	1	56	54	734078	150.5	290	126	78	1.897	86	1.721	120	1	9	1	10	2.5	0.307	1	35.641	3	78.5	NaN	NaN	22.65	14.136	0
207	2009	11	1	2	3	44	734078	152.5	320	156	78	1.936	86	1.727	116	1	17	1	17.5	5.5	0.358	1	31.877	1	95.8	NaN	NaN	22.65	14.121	0
208	2009	11	1	2	11	0	734078	159	308	142	78	1.897	88	1.727	108	1	13	1	32	12	0.341	1	33.358	1	97.3	NaN	NaN	22.65	14.126	0
209	2009	11	1	2	17	56	734078	186	318	156	84	1.905	78	1.821	104	1	9	1	81	44	0.37	0	32.677	1	84.8	NaN	NaN	22.65	13.953	0
210	2009	11	1	2	24	58	734078	179	336	174	84	1.94	78	1.679	170	1	19	1	103	48	0.344	1	31.335	3	94.5	NaN	NaN	22.65	13.987	0
211	2009	11	1	2	33	24	734078	162	302	138	76	1.789	88	1.716	102	1	15	1	62	26	0.342	1	33.625	1	90.5	NaN	NaN	22.7	14.051	1
212	2009	11	1	2	40	8	734078	168.5	298	120	88	1.733	90	1.711	112	1	17	1	63.5	17	0.293	1	32.393	1	98	NaN	NaN	22.55	14.07	0
213	2009	11	1	2	46	58	734078	172	322	148	80	1.869	94	1.697	134	1	15	1	57	23	0.325	1	32.49	3	79.5	NaN	NaN	23.1	14.086	0
214	2009	11	1	2	54	34	734078	175.5	328	142	92	1.804	94	1.814	404	1	15	1	59.5	12.5	0.194	1	31.736	1	98.3	NaN	NaN	23.05	14.023	0
215	2009	11	1	3	6	46	734078	211	398	174	104	2.014	120	1.663	152	1	15	1	28	12	0.316	0	30.724	1	82	NaN	NaN	23.3	13.465	0
216	2009	11	1	3	15	56	734078	201	394	138	112	1.781	144	1.243	476	1	7	1	31.5	25	0.159	1	30.729	3	82	NaN	NaN	23.1	13.711	0
217	2009	11	1	3	30	26	734078	11	28	4	12	0.917	12	0.917	10186	1	1	1	0	0	0	0	85.75	1	101	NaN	NaN	23	22.317	0
218	2009	11	1	6	20	40	734078	12.5	100	54	24	0.479	22	0.409	118	1	5	1	8.5	3.5	0.248	0	87.17	23	102.5	NaN	NaN	23.3	21.998	1
219	2009	11	1	6	24	18	734078	16	120	64	28	0.429	28	0.429	110	3	5	1	11	4	0.278	0	83.515	25	90	NaN	NaN	23.3	20.667	0
220	2009	11	1	6	28	8	734078	22	146	70	46	0.467	30	0.533	68	1	1	1	6.5	6	0.327	0	78.743	27	87.5	NaN	NaN	23.3	18.865	0
221	2009	11	1	6	31	42	734078	14.5	140	92	20	0.525	28	0.411	82	1	7	1	11	4	0.414	0	83.872	39	75.3	NaN	NaN	23.25	20.726	0
222	2009	11	1	6	35	24	734078	38	158	14	66	0.576	78	0.436	296	1	1	1	4	4	0.031	0	67.219	1	96.3	NaN	NaN	23.25	17.975	0
223	2009	11	1	6	42	58	734078	8.5	124	88	16	0.375	20	0.35	78	1	3	1	5	2.5	0.436	0	86.633	37	85	NaN	NaN	23.3	21.977	0
224	2009	11	1	6	46	20	734078	13	140	76	36	0.264	28	0.357	72	1	3	1	8.5	3.5	0.358	0	84.154	31	98.3	NaN	NaN	23.25	21.3	1
225	2009	11	1	6	49	52	734078	13	138	70	32	0.297	36	0.278	154	1	3	1	7.5	3.5	0.24	1	83.16	31	91	NaN	NaN	23.2	21.274	1
226	2009	11	1	6	54	44	734078	14	148	78	38	0.263	32	0.375	74	1	11	1	11	4	0.351	1	81.263	29	95	NaN	NaN	23.25	21.261	1
227	2009	11	1	6	58	26	734078	15.5	142	80	30	0.367	32	0.344	62	1	7	5	13	5	0.392	0	80.341	33	89.5	NaN	NaN	23.2	20.628	0
228	2009	11	1	7	1	50	734078	11.5	132	84	28	0.321	20	0.425	62	1	9	1	10.5	3.5	0.433	0	82.401	31	89.5	NaN	NaN	23.25	20.919	0
229	2009	11	1	7	5	4	734078	14	128	62	32	0.438	34	0.294	72	1	7	3	9	5	0.31	0	82.172	25	95.3	NaN	NaN	23.25	19.948	0
230	2009	11	1	7	8	24	734078	15.5	146	80	28	0.429	38	0.289	76	1	5	3	10	4.5	0.36	0	80.524	35	94	NaN	NaN	23.2	19.417	0
231	2009	11	1	7	12	6	734078	17.5	140	36	52	0.337	52	0.24	58	1	1	1	5	5	0.182	0	78.618	15	87.8	NaN	NaN	23.2	19.253	0
232	2009	11	1	7	15	24	734078	13	126	78	22	0.432	26	0.365	58	1	5	1	9	4	0.424	0	81.006	35	93.3	NaN	NaN	23.2	20.775	1
233	2009	11	1	7	18	28	734078	14.5	138	80	36	0.306	22	0.5	98	1	5	1	10	3.5	0.339	0	79.86	31	97.8	NaN	NaN	23.2	20.341	1
234	2009	11	1	7	22	24	734078	8	124	82	24	0.313	18	0.389	74	1	7	1	5.5	1	0.414	0	82.577	33	96.5	NaN	NaN	23.25	21.088	0
235	2009	11	1	7	25	42	734078	17	156	66	62	0.242	28	0.446	210	3	5	1	8.5	4.5	0.18	0	77.831	25	90.3	NaN	NaN	23.3	19.053	1
236	2009	11	1	7	31	48	734078	15.5	166	112	32	0.438	22	0.523	362	1	7	1	10.5	4	0.212	1	77.785	41	93.3	NaN	NaN	23.3	19.357	1
237	2009	11	1	7	40	36	734078	14.5	144	84	34	0.382	26	0.404	122	1	9	3	10.5	4	0.316	1	78.302	37	94	NaN	NaN	23.35	20.002	0
238	2009	11	1	7	45	2	734078	16.5	158	96	34	0.397	28	0.464	354	1	11	1	14.5	4	0.188	0	76.699	37	84.8	NaN	NaN	23.35	19.945	2
239	2009	11	1	7	53	34	734078	18.5	166	110	28	0.571	28	0.482	78	1	7	1	12.5	5	0.451	0	75.522	35	79.5	NaN	NaN	22.95	19.841	0
240	2009	11	1	7	57	38	734078	15	154	108	24	0.458	22	0.477	138	1	5	1	11.5	4.5	0.37	0	76.786	37	93.8	NaN	NaN	23.05	20.664	0
241	2009	11	1	8	2	30	734078	16	146	92	24	0.479	30	0.383	76	1	7	1	12	4.5	0.414	1	75.133	37	92.3	NaN	NaN	22.9	20.699	0
242	2009	11	1	8	6	12	734078	14.5	156	96	32	0.422	28	0.393	156	1	9	1	10.5	3.5	0.308	1	75.418	29	87.8	NaN	NaN	22.9	20.469	0
243	2009	11	1	8	11	24	734078	12.5	152	94	34	0.265	24	0.396	400	1	15	1	18.5	3.5	0.17	0	76.984	37	82.3	NaN	NaN	23.05	20.984	0
244	2009	11	1	8	20	36	734078	15.5	154	90	34	0.441	30	0.45	58	1	7	1	7.5	2.5	0.425	0	72.44	19	86	NaN	NaN	22.8	20.589	0
245	2009	11	1	8	24	8	734078	16.5	144	96	20	0.6	28	0.429	46	1	13	1	15	4.5	0.505	1	72.964	27	90	NaN	NaN	22.55	20.093	0
246	2009	11	1	8	27	18	734078	15	150	96	24	0.542	30	0.433	56	1	5	1	7	2	0.466	1	72.209	41	90	NaN	NaN	22.55	20.641	0
247	2009	11	1	8	30	44	734078	16.5	88	38	20	0.75	30	0.417	0	1	1	1	5.5	4	0.432	0	69.375	9	85.3	NaN	NaN	22.55	20.253	0
248	2009	11	1	8	32	12	734078	11.5	38	16	6	1.833	16	0.719	104	1	3	3	4.5	2.5	0.113	0	68.361	5	79.8	NaN	NaN	22.4	21.061	0
249	2009	11	1	8	34	34	734078	13.5	60	36	14	0.679	10	1.1	60	1	5	1	11.5	4	0.3	0	64.171	15	83	NaN	NaN	22.5	21.05	0
250	2009	11	1	8	36	34	734078	83	158	2	102	0.814	54	1.528	56	7	1	1	0.5	0.5	0.009	0	45.125	1	87	NaN	NaN	22.5	15.8	0
251	2009	11	1	8	40	8	734078	14	34	12	10	1.1	12	1.167	46	1	3	1	5	4	0.15	0	61	5	79.3	NaN	NaN	22.4	20.971	0
252	2009	11	1	8	41	28	734078	14	46	20	12	1.167	14	1	44	1	5	1	12	5	0.222	1	61.977	5	86.5	NaN	NaN	22.45	20.945	0
253	2009	11	1	8	42	58	734078	166.5	224	4	118	1.411	102	1.623	124	3	1	1	1	1	0.011	0	36.833	1	79.8	NaN	NaN	22.55	14.1	0
254	2009	11	1	8	48	46	734078	17	38	12	14	1.214	12	1.125	0	1	1	1	3.5	3.5	0.316	0	63.393	3	76.3	NaN	NaN	22.3	20.614	0
255	2009	11	1	8	49	24	734078	23	66	30	20	0.825	16	1.438	52	1	3	1	13.5	10	0.254	0	61.031	9	80.8	NaN	NaN	22.2	20.359	1
256	2009	11	1	8	51	22	734078	5	22	6	12	0.333	4	1.25	142	1	3	1	3	2	0.037	0	67.938	3	75.8	NaN	NaN	22.25	22.025	NaN
257	2009	11	1	8	54	6	734078	30.5	106	30	42	0.714	34	0.632	68	3	5	1	13.5	9	0.172	0	53.672	7	70.5	NaN	NaN	22.5	19.044	0
258	2009	11	1	8	57	0	734078	14.5	56	14	24	0.604	18	0.806	20	3	3	1	11	5.5	0.184	0	62.25	3	80	NaN	NaN	22.5	20.875	0
259	2009	11	1	8	58	16	734078	15	46	14	18	0.833	14	0.929	508	1	1	1	2	2	0.025	1	62.156	5	79.5	NaN	NaN	22.6	20.819	0
260	2009	11	1	9	7	30	734078	12.5	54	6	28	0.446	20	0.625	22	1	1	1	0	0	0.079	0	66.375	3	78	NaN	NaN	22.05	19.9	0
261	2009	11	1	9	8	46	734078	18	68	10	34	0.471	24	0.75	178	3	1	1	2	2	0.041	0	62.083	1	82.8	NaN	NaN	21.95	19.467	0
262	2009	11	1	9	12	52	734078	15.5	52	16	18	0.75	18	0.806	3182	1	1	1	3	2	0.005	0	63.417	7	76	NaN	NaN	21.7	19.356	0
263	2009	11	1	10	6	46	734078	7	120	100	10	0.6	10	0.7	54	1	3	1	7	4	0.575	0	66.716	25	71.5	NaN	NaN	21.5	19.475	0
264	2009	11	1	10	9	40	734078	11	118	70	38	0.211	10	1.1	80	3	3	1	4	3.5	0.354	0	64.847	9	76.3	NaN	NaN	21.35	19.21	2
265	2009	11	1	10	12	58	734078	10	134	52	14	0.714	68	0.103	90590	1	3	1	4	3	0.001	1	66.157	7	72.8	NaN	NaN	21	19.544	0
266	2009	11	2	11	25	2	734079	5.5	34	0	20	0.275	14	0.393	138	1	1	1	0	0	0	0	85.75	1	149	NaN	NaN	19.55	19.7	0
267	2009	11	2	11	27	54	734079	7	120	48	56	0.098	16	0.438	44	5	9	1	5.5	2	0.293	0	148.88	17	146.3	NaN	NaN	19.15	18.684	0
268	2009	11	2	11	30	38	734079	9	152	120	18	0.5	14	0.464	50	1	9	1	6.5	3	0.594	0	153.332	37	158	NaN	NaN	19.9	18.22	0
269	2009	11	2	11	34	0	734079	5.5	80	46	8	0.625	26	0.154	44	1	5	3	4	2	0.371	0	158.448	11	162.3	NaN	NaN	20.55	18.74	0
270	2009	11	2	11	36	4	734079	5	82	32	32	0.156	18	0.194	96	1	3	3	2.5	1.5	0.18	1	163.338	11	166.8	NaN	NaN	20.75	19.097	0
271	2009	11	2	11	39	2	734079	6	64	40	10	0.45	14	0.357	28	1	7	1	5.5	2	0.435	0	165.536	13	173.8	NaN	NaN	22.05	21.112	0
272	2009	11	2	11	40	34	734079	31	154	92	28	0.804	34	0.735	2568	1	1	1	14.5	8.5	0.034	0	154.165	27	NaN	NaN	3.4	22	20.414	0
273	2009	11	2	12	25	56	734080	49	190	64	60	0.792	66	0.538	116	1	1	1	15	13.5	0.209	0	168.697	17	NaN	NaN	-0.1	23.4	17.441	6
274	2009	11	2	12	31	2	734080	56.5	194	96	44	1.216	54	0.75	64	1	3	1	21	16	0.372	0	163.444	29	NaN	NaN	-1	23.35	17.167	7
275	2009	11	2	12	35	20	734080	188	324	88	122	1.525	114	1.627	126	1	9	1	17.5	4.5	0.196	0	111.772	31	NaN	NaN	0.4	23.3	13.637	4
276	2009	11	2	12	42	50	734080	190.5	472	246	114	1.671	112	1.67	180	1	35	1	46.5	7.5	0.377	1	110.306	69	181.2	-0.47	7.2	23.2	13.623	0
277	2009	11	2	12	53	42	734080	192	404	166	108	1.718	130	1.223	154	1	11	1	48.5	33	0.297	1	115.464	37	NaN	NaN	-3.1	23.2	13.263	2
278	2009	11	2	13	2	60	734080	195.5	384	162	100	1.86	122	1.586	122	1	11	1	17.5	9.5	0.32	1	113.055	43	NaN	NaN	2.4	23.15	12.901	3
279	2009	11	2	13	11	26	734080	194.5	336	102	106	1.821	128	1.504	180	1	13	1	14.5	2.5	0.198	1	113.606	25	NaN	NaN	1.7	23.1	13.016	0
280	2009	11	2	13	20	2	734080	202	356	134	102	1.926	120	1.679	160	1	7	1	33	16.5	0.26	1	114.787	37	NaN	NaN	2	23.2	13.012	0
281	2009	11	2	13	28	38	734080	226.5	502	266	108	1.935	128	1.715	374	1	19	1	84.5	21.5	0.304	0	106.498	79	NaN	NaN	2.4	23.2	12.888	0
282	2009	11	2	13	43	14	734080	257.5	466	202	120	2.063	144	1.788	192	1	19	1	32	10	0.307	0	89.9	65	NaN	NaN	2.3	23.25	11.29	0
283	2009	11	2	13	54	12	734080	253	414	150	128	1.977	136	1.798	292	1	9	1	22.5	13	0.212	1	94.457	39	NaN	NaN	3.6	23.15	11.554	0
284	2009	11	2	14	5	58	734080	246	388	130	124	1.948	134	1.828	146	1	7	1	8.5	4.5	0.243	1	100.561	37	NaN	NaN	1.7	23.25	11.855	0
285	2009	11	2	14	14	52	734080	245.5	342	90	118	2.047	134	1.799	192	1	11	1	31.5	7	0.169	1	100.663	23	NaN	NaN	0.2	23.15	12.571	1
286	2009	11	2	14	23	46	734080	255.5	376	104	124	2.024	148	1.726	626	1	7	1	14.5	5.5	0.104	1	98.108	25	NaN	NaN	-0.2	23.2	12.014	1
287	2009	11	2	14	40	28	734080	223	334	82	118	1.89	134	1.646	206	1	5	1	5.5	3	0.152	0	109.792	23	NaN	NaN	2.3	23.35	13.123	0
288	2009	11	2	14	49	28	734080	200.5	370	150	102	1.887	118	1.699	186	1	7	1	13	8	0.27	0	120.668	33	NaN	NaN	-2.1	23.3	12.982	3
289	2009	11	2	14	58	44	734080	206	358	138	102	2.015	118	1.678	140	1	15	1	33.5	8	0.277	1	117.346	35	NaN	NaN	-4	23.3	13	0
290	2009	11	2	15	7	2	734080	212	340	122	98	1.99	120	1.763	442	1	23	1	51.5	19	0.156	1	112.956	31	NaN	NaN	3	23.25	12.988	0
291	2009	11	2	15	20	4	734080	198.5	292	68	104	1.904	120	1.642	202	1	3	1	4	1.5	0.138	1	120.471	15	NaN	NaN	2.9	23.35	13.101	0
292	2009	11	2	15	28	18	734080	189.5	276	56	98	1.929	122	1.504	274	1	3	1	7.5	6.5	0.102	1	126.974	13	NaN	NaN	1.1	23.35	13.262	0
293	2009	11	2	15	37	28	734080	204	342	124	94	1.995	124	1.641	330	1	5	1	20	16.5	0.185	1	115.504	35	NaN	NaN	0	23.4	13.08	0
294	2009	11	2	15	48	40	734080	206.5	326	116	90	2.233	120	1.696	174	1	5	1	20.5	8.5	0.232	1	117.962	31	NaN	NaN	1.6	23.4	13.098	0
295	2009	11	2	15	57	0	734080	206	328	114	90	2.2	124	1.661	342	1	13	1	20	8	0.17	1	116.086	39	NaN	NaN	3.1	23.35	13.134	0
296	2009	11	2	16	8	10	734080	201	342	110	110	1.818	122	1.639	320	1	15	1	19	4.5	0.166	1	117.103	33	NaN	NaN	3.5	23.35	13.169	0
297	2009	11	2	16	19	12	734080	220.5	350	130	98	2.138	122	1.799	836	1	11	1	26	11	0.11	1	113.413	41	NaN	NaN	-1.5	23.4	13.117	0
298	2009	11	2	16	38	58	734080	218.5	310	44	128	1.707	138	1.551	560	1	1	1	4.5	4.5	0.051	1	114.989	13	NaN	NaN	3.5	23.5	13.224	0
299	2009	11	2	16	53	28	734080	205	308	68	114	1.798	126	1.603	252	1	7	1	6	3	0.121	1	120.871	23	NaN	NaN	0.8	23.45	13.194	0
300	2009	11	2	17	2	48	734080	204.5	326	92	108	1.81	126	1.567	200	1	5	1	19	9	0.175	1	123.378	27	NaN	NaN	5.8	23.4	13.189	1
301	2009	11	2	17	11	34	734080	215	338	110	104	2.067	124	1.665	246	1	13	1	23.5	9.5	0.188	1	121.384	31	NaN	NaN	-3.9	23.4	13.136	0
302	2009	11	2	17	21	18	734080	224.5	318	80	106	2.075	132	1.678	724	1	5	1	9.5	4.5	0.077	1	113.012	23	NaN	NaN	2.1	23.35	13.189	0
303	2009	11	2	17	38	40	734080	243	354	82	124	1.875	148	1.642	222	1	3	1	11.5	10.5	0.142	1	109.708	27	NaN	NaN	-2.1	23.4	13.263	0
304	2009	11	2	17	48	16	734080	235	434	174	122	1.898	138	1.667	534	1	19	1	62.5	25	0.18	1	114.216	49	NaN	NaN	-1.2	23.35	12.41	0
305	2009	11	2	18	4	24	734080	240.5	420	166	118	1.966	136	1.739	566	1	15	1	29.5	9.5	0.168	1	115.354	47	NaN	NaN	2	23.45	11.639	0
306	2009	11	2	18	20	50	734080	239.5	358	98	122	1.943	138	1.736	1078	1	7	1	9.5	3	0.068	1	114.33	27	NaN	NaN	4.9	23.5	12.207	0
307	2009	11	2	18	44	46	734080	6	44	16	20	0.225	8	0.563	156	1	1	1	3	1.5	0.08	0	211.056	5	217	NaN	NaN	23.55	20.667	0
308	2009	11	2	18	48	6	734080	252.5	380	100	132	1.871	148	1.703	116	1	7	1	16	5.5	0.202	0	109.029	27	NaN	NaN	-2.8	23.6	12.546	0
309	2009	11	2	18	56	22	734080	8	26	4	10	0.65	12	0.583	208	1	1	1	2.5	1.5	0.017	0	205.25	1	218	NaN	NaN	23.35	20.233	1
310	2009	11	2	19	0	16	734080	232	388	126	122	1.873	140	1.646	376	1	7	1	11	3.5	0.165	0	115.945	37	NaN	NaN	1.9	23.5	12.995	0
311	2009	11	2	19	13	0	734080	229	368	108	130	1.762	130	1.719	1136	1	13	1	17.5	7.5	0.072	1	116.245	31	NaN	NaN	5.4	23.45	12.876	0
312	2009	11	2	19	38	4	734080	216	400	150	120	1.65	130	1.642	4668	1	13	1	43.5	18	0.03	1	109.944	53	NaN	NaN	1.3	23.5	13.316	0
313	2009	11	2	21	2	32	734080	7.5	52	14	22	0.25	16	0.469	216	1	1	1	2	2	0.052	0	195.844	3	200	NaN	NaN	22.7	20.737	0
314	2009	11	2	21	6	60	734080	230.5	368	108	120	1.908	140	1.571	592	1	1	1	12	10.5	0.113	0	103.909	29	NaN	NaN	5.6	22.4	13.143	0
315	2009	11	2	21	23	0	734080	203.5	386	138	116	1.724	132	1.504	3878	1	9	1	14.5	5.5	0.032	0	114.689	45	NaN	NaN	0.9	22.05	13.241	1
316	2009	11	2	22	34	4	734080	6.5	46	6	26	0.25	14	0.357	88	1	1	1	1.5	1.5	0.045	0	183.813	1	192.3	NaN	NaN	20.3	19.925	3
317	2009	11	2	22	36	18	734080	63.5	142	12	60	1.058	70	0.857	254	1	3	1	4.5	4	0.03	0	151.964	5	NaN	NaN	5.5	20.7	16.064	0
318	2009	11	2	22	42	54	734080	12.5	60	4	26	0.442	30	0.383	218	1	1	1	2	1	0.014	0	179.417	1	198.8	NaN	NaN	22.2	21.883	9
319	2009	11	2	22	47	32	734080	267	408	110	146	1.825	152	1.704	558	1	5	1	10.5	8	0.114	0	74.473	17	NaN	NaN	-0.2	21.95	12.901	0
320	2009	11	2	23	3	38	734080	274	398	110	136	1.838	152	1.701	292	1	1	1	39.5	24	0.159	1	69.723	15	NaN	NaN	3.3	23.25	12.965	0
321	2009	11	2	23	15	8	734080	138.5	232	36	80	1.5	116	1.168	572	1	3	1	22.5	18.5	0.045	0	112.632	11	NaN	NaN	3.1	23.3	15.455	0
322	2009	11	2	23	28	32	734080	284	440	126	148	1.895	166	1.711	416	1	9	1	10.5	4	0.147	0	49.859	17	177.5	NaN	NaN	23.3	11.607	0
323	2009	11	2	23	42	48	734080	87	188	38	68	1.243	82	0.957	292	1	3	1	14	8.5	0.079	0	115.938	5	169.8	NaN	NaN	23.25	16.488	3
324	2009	11	2	23	50	48	734080	58	156	38	52	1.087	66	0.795	268	1	7	1	13	5.5	0.09	0	122.5	9	160.3	NaN	NaN	23.25	17.433	5
325	2009	11	2	23	57	52	734080	278.5	450	130	156	1.782	164	1.686	280	1	7	1	7	2.5	0.178	0	33.883	1	143.3	NaN	NaN	23.25	12.417	2
326	2009	11	3	0	10	2	734080	43	156	70	42	0.774	44	0.75	110	1	5	1	25.5	10.5	0.263	0	91.521	19	122.5	NaN	NaN	23.2	18.918	6
327	2009	11	3	0	14	28	734080	32	174	110	30	0.817	34	0.809	102	1	7	1	41	16.5	0.399	0	89.348	33	112.5	NaN	NaN	23.2	19.744	1
328	2009	11	3	0	19	4	734080	22	118	62	20	0.825	36	0.528	102	1	7	1	18.5	7	0.282	0	82	25	103.3	NaN	NaN	23.25	21.773	4
329	2009	11	3	0	22	44	734080	27.5	124	62	34	0.647	28	0.911	70	1	5	1	16.5	5.5	0.32	0	73.289	15	97.5	NaN	NaN	23.3	19.411	0
330	2009	11	3	0	25	58	734080	36.5	164	84	38	0.737	42	0.655	66	1	7	1	30.5	12	0.365	0	64.093	11	92.5	NaN	NaN	23.3	18.405	6
331	2009	11	3	0	29	48	734080	30.5	164	92	38	0.579	34	0.897	52	1	5	1	30.5	15.5	0.426	0	62.447	17	83.8	NaN	NaN	23.25	18.583	6
332	2009	11	3	0	33	24	734080	33.5	152	74	42	0.798	36	0.722	58	1	11	1	18.5	9.5	0.352	1	58.362	7	69.8	NaN	NaN	23.2	18.501	4
333	2009	11	3	0	36	54	734080	34.5	174	104	38	0.75	32	0.781	58	1	5	1	26.5	9.5	0.448	1	54.566	11	70.5	NaN	NaN	23.2	17.839	1
334	2009	11	3	0	40	46	734080	47	166	38	82	0.573	46	0.88	68	3	3	1	21.5	14	0.162	0	47.337	5	82.5	NaN	NaN	23.15	17.625	0
335	2009	11	3	0	44	40	734080	48	160	22	78	0.545	60	0.8	138	1	1	1	5.5	5.5	0.074	1	49.438	1	77	NaN	NaN	23.2	17.688	4
336	2009	11	3	0	49	38	734080	27.5	146	76	34	0.706	36	0.736	108	1	7	1	14.5	5	0.299	0	61.667	15	77	NaN	NaN	23.25	19.223	3
337	2009	11	3	0	53	52	734080	35	122	26	34	0.824	62	0.548	98	1	3	5	10	7	0.118	0	55.768	5	78.5	NaN	NaN	23.25	18.218	1
338	2009	11	3	0	57	32	734080	23.5	110	22	64	0.359	24	0.854	346	3	3	1	5.5	3	0.048	0	63.021	5	70.3	NaN	NaN	23.25	18.942	4
339	2009	11	3	1	5	8	734080	27	98	26	40	0.675	32	0.813	102	3	5	1	15	6	0.13	0	55.536	5	87.8	NaN	NaN	23.3	18.8	5
340	2009	11	3	1	8	28	734080	29	102	44	28	1.036	30	0.683	154	1	5	1	15.5	11.5	0.172	1	63.641	9	83	NaN	NaN	23.3	19.178	2
341	2009	11	3	1	12	44	734080	45	124	30	32	1.406	62	0.653	230	1	5	1	10.5	6.5	0.085	0	48.672	5	87.3	NaN	NaN	23.3	18.072	3
342	2009	11	3	1	18	38	734080	38.5	140	64	34	0.809	42	0.917	92	1	5	1	13	11	0.276	0	59.955	9	88	NaN	NaN	23.3	18.102	2
343	2009	11	3	1	22	30	734080	25.5	150	98	30	0.8	22	0.818	96	1	7	1	31	11	0.398	0	68.095	23	88.8	NaN	NaN	23.25	19.691	5
344	2009	11	3	1	26	36	734080	23	134	82	28	0.732	24	0.875	42	1	11	1	21.5	5.5	0.466	1	68.095	19	86.5	NaN	NaN	23.25	18.824	3
345	2009	11	3	1	29	32	734080	19.5	90	34	26	0.692	30	0.633	58	1	5	1	6	1.5	0.23	0	70.625	15	89.3	NaN	NaN	23.2	19.603	2
346	2009	11	3	1	32	0	734080	14	66	26	16	0.813	24	0.521	2	1	3	3	5.5	3	0.382	0	70.054	9	86.5	NaN	NaN	23.25	19.971	0
347	2009	11	3	1	33	8	734080	15	70	24	20	0.525	26	0.558	56	1	3	1	6	5	0.19	1	69.904	9	66	NaN	NaN	21.85	19.854	3
348	2009	11	3	1	35	14	734080	25	132	72	20	1.05	40	0.625	70	1	9	1	18	5	0.356	0	68.986	15	88.3	NaN	NaN	23.2	19.664	6
349	2009	11	3	1	38	36	734080	33	156	78	46	0.533	32	0.813	74	1	9	1	22.5	9.5	0.339	0	65.906	15	91	NaN	NaN	23.3	18.63	4
350	2009	11	3	1	42	26	734080	28.5	156	102	22	0.932	32	0.891	80	1	7	1	22	8.5	0.432	0	69.88	23	91.5	NaN	NaN	23.25	19.275	4
351	2009	11	3	1	46	22	734080	29.5	130	70	32	0.859	28	0.982	72	1	5	1	17	8	0.347	1	67.722	17	78	NaN	NaN	23.25	19.183	0
352	2009	11	3	1	49	44	734080	30	152	92	30	0.867	30	0.817	124	1	9	1	27.5	10	0.333	1	67.819	19	81.8	NaN	NaN	23.25	19.028	0
353	2009	11	3	1	54	20	734080	25.5	132	70	32	0.641	30	0.783	562	3	7	1	12	5	0.101	0	71.465	17	86	NaN	NaN	23.2	18.969	0
354	2009	11	3	2	5	54	734080	27	130	66	34	0.691	30	0.767	124	1	9	1	13.5	4.5	0.26	1	73.191	15	82.3	NaN	NaN	23.35	18.303	0
355	2009	11	3	2	10	8	734080	47	90	14	50	0.94	26	1.269	8	1	3	1	15	14.5	0.143	0	56.875	3	96	NaN	NaN	23.3	18.256	3
356	2009	11	3	2	11	46	734080	12.5	46	2	30	0.417	14	0.893	124	1	1	1	0	0	0.012	0	73.25	1	89	NaN	NaN	23.2	20.875	2
357	2009	11	3	2	14	36	734080	43.5	74	2	46	0.946	26	1.673	94	1	1	1	0	0	0.012	0	56.375	1	76.5	NaN	NaN	23.3	18.125	0
358	2009	11	3	2	17	24	734080	71.5	162	42	48	1.125	72	0.993	82	1	5	1	26.5	21.5	0.172	0	51.42	3	95	NaN	NaN	23.3	17.67	0
359	2009	11	3	2	21	28	734080	54	194	102	46	1.065	46	1.152	98	1	9	1	29	9.5	0.349	0	58.952	9	89.5	NaN	NaN	23.25	17.657	0
360	2009	11	3	2	26	20	734080	73.5	178	66	50	1.12	62	1.008	104	1	7	1	37.5	19	0.234	0	49.39	7	97.3	NaN	NaN	23.25	17.216	0
361	2009	11	3	2	31	2	734080	68.5	158	54	52	1.279	52	0.923	396	1	7	1	28.5	21.5	0.097	1	56.768	9	97.5	NaN	NaN	23.25	17.38	0
362	2009	11	3	2	40	16	734080	62.5	166	28	68	0.868	70	0.886	188	1	3	1	5	3.5	0.079	1	54.7	3	99.5	NaN	NaN	23.3	17.553	0
363	2009	11	3	2	46	10	734080	60	162	42	58	1.034	62	0.847	942	1	5	1	10.5	7.5	0.038	1	54.648	9	98	NaN	NaN	23.3	17.582	0
364	2009	11	3	3	4	34	734080	54	106	26	50	0.97	30	1.617	86	1	5	1	14	6.5	0.135	0	55.911	5	87.8	NaN	NaN	23.35	17.771	0
365	2009	11	3	3	7	46	734080	51.5	110	52	36	1.361	22	1.659	44	1	3	1	25.5	15	0.338	1	56.861	7	95	NaN	NaN	23.3	17.811	0
366	2009	11	3	3	10	20	734080	54	70	2	32	1.672	36	1.5	122	1	1	1	0.5	0.5	0.01	1	52.875	1	77.5	NaN	NaN	23.1	17.525	0
367	2009	11	3	3	13	32	734080	59	154	78	32	1.5	44	1.25	82	1	5	1	25	11	0.331	1	56.756	9	100.3	NaN	NaN	23.25	17.394	0
368	2009	11	3	3	17	28	734080	69.5	146	46	56	1.223	44	1.193	104	1	3	5	28	17	0.184	0	53.115	7	85.5	NaN	NaN	23.2	17.09	0
369	2009	11	3	3	21	38	734080	74	202	110	48	1.344	44	1.307	70	1	13	1	48	17.5	0.404	1	55.29	7	104	NaN	NaN	23.25	17.132	0
370	2009	11	3	3	26	10	734080	66.5	178	70	52	1.202	56	1.089	136	1	5	5	20.5	8	0.223	0	59.931	7	101.3	NaN	NaN	23.15	17.212	0
371	2009	11	3	3	31	24	734080	45	170	102	36	1.125	32	1.25	72	1	9	1	23.5	5.5	0.421	0	68.822	17	101	NaN	NaN	23.25	17.8	0
372	2009	11	3	3	35	26	734080	61.5	136	24	68	0.691	44	1.386	28	3	3	3	19	16.5	0.146	0	61.038	3	100	NaN	NaN	23.2	17.354	0
373	2009	11	3	3	38	10	734080	25.5	54	4	36	0.583	14	1.679	150	3	1	1	6.5	4.5	0.02	0	70.417	1	85.5	NaN	NaN	23.1	18.75	0
374	2009	11	3	3	41	34	734080	44	158	82	38	1.092	38	1.026	72	1	9	1	16.5	6	0.357	0	69.405	11	80.8	NaN	NaN	23.3	17.931	0
375	2009	11	3	3	45	24	734080	46.5	150	58	40	1.075	52	0.894	60	1	7	3	22.5	10.5	0.276	1	69.267	7	98.8	NaN	NaN	23.2	17.718	0
376	2009	11	3	3	48	54	734080	46	208	124	48	0.865	36	1.153	66	1	11	1	22	6	0.453	1	69	19	101.5	NaN	NaN	23.2	17.569	0
377	2009	11	3	3	53	28	734080	43	92	4	46	0.924	42	0.976	184	1	1	3	2.5	2	0.014	1	63.5	1	88.5	NaN	NaN	23.15	17.533	0
378	2009	11	3	3	58	4	734080	57	164	74	42	1.226	48	1.01	80	1	7	1	28	10.5	0.303	0	62.868	13	76	NaN	NaN	23.3	17.382	0
379	2009	11	3	4	2	8	734080	48.5	198	102	42	1.048	54	0.787	72	1	5	1	35.5	12.5	0.378	0	68.577	15	101.5	NaN	NaN	23.25	17.564	0
380	2009	11	3	4	6	38	734080	60	168	54	60	0.883	54	0.907	100	1	5	1	29	11.5	0.201	0	59.313	7	75.3	NaN	NaN	23.2	17.305	0
381	2009	11	3	4	11	6	734080	52	192	78	52	0.962	62	0.637	108	1	7	1	29.5	15	0.26	0	67.362	5	97.8	NaN	NaN	23.25	17.442	0
382	2009	11	3	4	16	6	734080	57.5	174	30	70	0.814	74	0.777	3764	1	5	1	10.5	4	0.008	0	59.781	3	79.5	NaN	NaN	23.2	17.262	0
383	2009	11	3	5	21	44	734080	5	56	18	30	0.167	8	0.438	9792	3	3	1	2.5	2	0.002	0	99.575	7	105.3	NaN	NaN	23.3	23.005	1
384	2009	11	3	8	5	52	734080	57.5	208	90	50	0.82	68	0.632	314	1	5	1	42	17.5	0.172	0	65.636	11	78.8	NaN	NaN	23.2	17.103	0
385	2009	11	3	8	14	34	734080	266	470	170	138	1.917	162	1.525	212	1	5	1	23.5	19	0.249	0	30.302	1	78	NaN	NaN	23.1	13.347	0
386	2009	11	3	8	25	56	734080	231.5	526	278	122	1.898	126	1.56	530	1	21	1	63	36.5	0.263	0	28.382	1	99.8	NaN	NaN	23.1	13.254	0
387	2009	11	3	8	43	32	734080	239	418	150	124	1.911	144	1.66	390	1	15	1	11	3	0.186	1	30.53	1	87	NaN	NaN	23.15	13.215	0
388	2009	11	3	8	57	0	734080	242	458	170	120	1.971	168	1.414	730	1	15	1	29	9.5	0.143	1	37.689	3	89.5	NaN	NaN	22.9	13.147	0
389	2009	11	3	9	16	48	734080	259.5	450	162	124	2	164	1.582	642	1	3	3	12.5	11.5	0.148	1	30.57	1	99.3	NaN	NaN	23.15	13.025	0
390	2009	11	3	9	34	60	734080	246	446	174	130	1.888	142	1.676	544	3	11	1	14.5	8.5	0.176	1	29.753	1	93.3	NaN	NaN	23.2	13.125	0
391	2009	11	3	9	51	30	734080	238	412	146	124	1.907	142	1.658	1664	1	7	1	8	3.5	0.07	1	30.628	1	93.5	NaN	NaN	23.15	13.146	0
392	2009	11	3	10	26	6	734080	66	170	52	56	1.134	62	0.96	104	1	7	1	40	12	0.19	0	44.685	9	74.5	NaN	NaN	23.25	17.485	0
393	2009	11	3	10	30	40	734080	82	152	18	54	1.333	80	1.025	186	1	3	1	11	10.5	0.053	0	42.725	1	90.3	NaN	NaN	23.15	17.45	1
394	2009	11	3	10	36	18	734080	80	220	90	52	1.317	78	0.949	524	1	9	3	38.5	12	0.121	1	39.511	1	84.3	NaN	NaN	23.2	17.161	1
395	2009	11	3	10	48	42	734080	44.5	158	74	30	1.2	54	0.731	116	1	7	1	26.5	11	0.27	0	55.243	9	85.3	NaN	NaN	23.2	18.639	0
396	2009	11	3	10	53	16	734080	68.5	166	4	74	0.905	88	0.756	0	1	1	7	3.5	2	0.024	0	45.667	1	89.3	NaN	NaN	23.15	17.55	0
397	2009	11	3	10	56	2	734080	7.5	20	4	8	0.938	8	0.875	6	1	1	1	1.5	1	0.154	0	80.083	1	86.5	NaN	NaN	22.95	22.433	2
398	2009	11	3	10	56	28	734080	8	22	2	8	1	12	0.667	550	1	1	1	0	0	0.003	1	74	1	75.3	NaN	NaN	23.05	22.5	2
399	2009	11	3	11	6	0	734080	58	188	86	48	1.042	54	1.074	84	1	7	1	43	15.5	0.316	0	67.398	19	78.8	NaN	NaN	23.2	18.647	4
400	2009	11	3	11	10	32	734080	78	258	140	72	1.063	46	1.457	70	1	13	1	69.5	26.5	0.427	0	70.574	29	82.5	NaN	NaN	23.15	17.602	5
401	2009	11	3	11	16	0	734080	95.5	254	136	60	1.475	58	1.647	56	1	13	1	112	21	0.439	0	68.902	23	114.5	NaN	NaN	23.1	16.956	3
402	2009	11	3	11	21	10	734080	92	172	66	54	1.602	52	1.625	56	1	7	1	75	26.5	0.289	1	80.787	21	106.8	NaN	NaN	23.05	16.84	3
403	2009	11	3	11	24	58	734080	123	228	4	158	0.775	66	1.811	80	9	1	1	4	3.5	0.013	0	77.417	1	134.5	NaN	NaN	23.05	15.8	3
404	2009	11	3	11	30	6	734080	275.5	446	158	140	1.95	148	1.807	186	1	15	1	34.5	15	0.25	0	41.078	11	127	NaN	NaN	23.05	13.083	0
405	2009	11	3	11	40	38	734080	268.5	434	150	134	1.97	150	1.777	204	1	9	1	11.5	4.5	0.235	1	55.237	15	169.5	NaN	NaN	23.05	13.272	0
406	2009	11	3	11	51	16	734080	224	382	126	126	1.75	130	1.623	186	1	15	3	55	17.5	0.222	0	63.723	27	171	NaN	NaN	23	12.974	0
407	2009	11	3	12	0	44	734081	257.5	396	132	122	1.98	142	1.803	304	1	3	1	18.5	16	0.189	0	60.664	17	173.3	NaN	NaN	23.1	12.514	4
408	2009	11	3	12	12	24	734081	260.5	440	154	134	1.933	152	1.711	290	1	11	1	7	2	0.211	1	66.202	27	NaN	NaN	4.5	23.1	12.165	0
409	2009	11	3	12	24	34	734081	278	404	108	136	1.908	160	1.722	406	1	11	1	34	18.5	0.133	1	66.927	19	NaN	NaN	2.6	23.05	11.872	0
410	2009	11	3	12	38	4	734081	280	448	158	140	1.854	150	1.787	354	1	9	1	41.5	20.5	0.197	1	67.084	25	NaN	NaN	3.6	23.1	11.713	0
411	2009	11	3	12	51	26	734081	277.5	442	130	150	1.843	162	1.679	368	1	13	1	19.5	5.5	0.16	1	72.758	21	NaN	NaN	-0.3	23.1	11.333	0
412	2009	11	3	13	4	56	734081	264	440	130	146	1.801	164	1.576	762	1	11	1	17.5	6	0.108	1	86.989	39	NaN	NaN	0.9	23.1	11.313	0
413	2009	11	3	13	24	58	734081	239.5	456	202	120	1.929	134	1.735	214	1	19	1	62	9.5	0.301	1	99.748	57	NaN	NaN	-1.3	23.1	12.558	2
414	2009	11	3	13	36	8	734081	250	396	138	114	2.171	144	1.729	650	1	25	1	46.5	6	0.132	1	98.596	33	NaN	NaN	1.3	23.05	11.529	0
415	2009	11	3	13	53	34	734081	276	408	110	136	1.956	162	1.704	468	1	13	1	27	10	0.126	0	86.629	39	NaN	NaN	4.3	23.2	11.368	0
416	2009	11	3	14	8	10	734081	276	492	198	136	2	158	1.706	250	1	17	1	24.5	7	0.267	1	93.58	59	NaN	NaN	-0.4	23.15	11.472	0
417	2009	11	3	14	20	32	734081	275	372	70	134	2.03	168	1.637	374	1	7	1	7	3	0.094	1	94.049	17	NaN	NaN	3.2	23.15	11.976	1
418	2009	11	3	14	32	58	734081	278.5	456	146	140	1.975	170	1.635	278	1	11	1	19.5	4.5	0.199	1	96.527	43	NaN	NaN	1	23.2	11.836	0
419	2009	11	3	14	45	12	734081	277.5	478	178	132	2.064	168	1.649	1062	1	15	3	18.5	5.5	0.116	1	96.869	51	NaN	NaN	1	23.15	11.824	0
420	2009	11	3	15	10	52	734081	276	460	194	140	1.957	126	1.599	988	1	7	1	99.5	84.5	0.134	1	107.087	45	NaN	NaN	-2.2	23.35	12.339	0
421	2009	11	3	15	34	60	734081	255.5	442	158	128	1.988	156	1.638	486	1	17	1	31.5	6	0.17	1	109.206	43	NaN	NaN	0.7	23.3	12.19	0
422	2009	11	3	15	50	28	734081	255	426	154	124	2.024	148	1.72	270	1	21	1	35	5.5	0.221	1	107.83	51	NaN	NaN	4.7	23.35	12.214	0
423	2009	11	3	16	2	4	734081	268	460	174	140	1.907	146	1.815	948	1	23	1	37	7.5	0.124	1	104.463	41	NaN	NaN	-0.2	23.35	11.875	0
424	2009	11	3	16	25	32	734081	267.5	444	158	130	2.023	156	1.692	290	1	19	1	36	4.5	0.215	1	101.425	39	NaN	NaN	-4.7	23.5	11.891	0
425	2009	11	3	16	37	46	734081	269.5	396	112	132	2.019	152	1.773	454	1	7	1	7	3.5	0.132	1	101.658	31	NaN	NaN	-0.3	23.4	11.581	0
426	2009	11	3	16	51	56	734081	256.5	434	154	132	1.913	148	1.713	904	1	23	1	36	6	0.115	1	106.724	53	NaN	NaN	-2.3	23.5	11.258	0
427	2009	11	3	17	14	14	734081	219	374	126	114	1.895	134	1.631	1474	1	7	1	18.5	8.5	0.068	0	117.008	33	NaN	NaN	0.7	23.65	11.859	0
428	2009	11	3	17	45	2	734081	217.5	336	110	100	2.11	126	1.718	184	1	15	1	32.5	8	0.212	1	118.46	31	NaN	NaN	1.2	23.75	12.184	0
429	2009	11	3	17	53	42	734081	230	374	138	102	2.132	134	1.716	434	1	11	1	24	13	0.171	1	120.575	39	NaN	NaN	4.2	23.7	11.764	0
430	2009	11	3	18	7	10	734081	236	366	106	124	1.903	136	1.695	2228	1	7	1	9.5	6	0.041	1	118.375	33	183.3	0.857	6.4	23.7	11.594	0
431	2009	11	3	18	50	24	734081	256	326	40	126	1.663	160	1.6	292	1	3	1	55.5	51	0.065	1	108.464	15	NaN	NaN	-2.7	23.85	12.44	0
432	2009	11	3	19	0	42	734081	251	366	96	126	1.917	144	1.743	588	1	3	1	11.5	9.5	0.101	1	108.98	23	NaN	NaN	2.1	23.65	11.802	0
433	2009	11	3	19	16	36	734081	240.5	354	74	138	1.688	142	1.694	240	3	7	1	17.5	8.5	0.125	1	113.533	21	NaN	NaN	1.6	23.7	12.164	0
434	2009	11	3	19	26	30	734081	247.5	376	110	130	1.885	136	1.706	162	1	3	1	19	15.5	0.204	1	105.554	33	NaN	NaN	2.5	23.6	12.221	0
435	2009	11	3	19	35	28	734081	258	376	126	110	2.264	140	1.8	280	1	15	1	23	9	0.192	1	102.266	35	NaN	NaN	4.5	23.6	12.198	0
436	2009	11	3	19	46	24	734081	232	340	80	122	1.898	138	1.63	144	1	5	1	10.5	7	0.165	0	114.207	19	204.9	-0.327	7.3	23.5	12.36	0
437	2009	11	3	19	54	28	734081	218.5	384	150	110	1.941	124	1.762	188	1	19	1	26	5.5	0.262	1	116.164	49	179.3	1.113	6.2	23.5	12.191	0
438	2009	11	3	20	4	0	734081	269	362	108	126	2.115	128	1.832	344	1	5	1	48	34.5	0.153	0	100.655	27	NaN	NaN	0	23.5	12.314	0
439	2009	11	3	20	15	46	734081	237	348	98	120	1.975	130	1.723	1860	1	7	1	16	13	0.044	0	107.805	31	NaN	NaN	2	23.65	12.519	0
440	2009	11	3	20	52	34	734081	5.5	48	6	30	0.183	12	0.417	376	1	1	1	0.5	0.5	0.014	0	202.563	1	205.8	NaN	NaN	23.55	22.3	0
441	2009	11	3	20	59	38	734081	5	48	22	12	0.292	14	0.357	1306	1	5	1	3.5	2	0.016	1	201.813	7	209	NaN	NaN	23.7	22.129	0
442	2009	11	3	21	22	12	734081	232	334	70	118	1.949	146	1.545	206	1	3	1	10.5	6.5	0.13	0	103.528	21	176.8	1.075	6.9	23.45	13.864	0
443	2009	11	3	21	31	12	734081	227.5	352	92	130	1.735	130	1.7	134	1	7	1	11.5	6.5	0.189	1	102.42	25	NaN	NaN	-3.3	23	13.751	0
444	2009	11	3	21	39	18	734081	207	358	142	96	2.135	120	1.7	132	1	9	1	29	9.5	0.29	1	107.306	41	NaN	NaN	5.8	23.15	13.706	0
445	2009	11	3	21	47	28	734081	200	330	112	106	1.877	112	1.71	184	1	5	1	12.5	9	0.218	1	109.715	31	NaN	NaN	0.6	23.05	13.824	0
446	2009	11	3	21	56	2	734081	200.5	340	110	104	1.808	126	1.587	918	1	5	1	20	12.5	0.087	1	107.509	31	NaN	NaN	0.2	22.9	13.605	0
447	2009	11	3	22	17	0	734081	182.5	328	134	90	1.983	104	1.755	234	1	13	1	20	7.5	0.238	1	112.176	41	NaN	NaN	2.7	22.45	13.943	0
448	2009	11	3	22	26	22	734081	197.5	378	186	80	2.256	112	1.652	6578	1	15	1	46.5	17	0.027	1	108.181	61	171.8	1.333	9.1	22	13.211	0
449	2009	11	4	0	22	18	734081	13	64	28	18	0.722	18	0.667	128	1	3	1	2	1.5	0.146	0	81.917	9	89.8	NaN	NaN	21.4	20.393	7
450	2009	11	4	0	25	30	734081	13	96	68	16	0.813	12	0.917	48	1	5	1	4	2.5	0.472	1	76.871	15	87.5	NaN	NaN	20.8	20.354	1
451	2009	11	4	0	27	54	734081	8	90	56	12	0.667	22	0.273	42594	1	1	1	2	2	0.001	0	77.034	15	86	NaN	NaN	20.75	20.59	4
452	2009	11	4	12	19	18	734082	6	94	70	14	0.321	10	0.5	28	1	7	1	6.5	2.5	0.574	0	186.646	25	198.3	NaN	NaN	20.35	19.932	NaN
453	2009	11	4	12	21	20	734082	7	124	90	26	0.25	8	0.625	38	1	7	1	6.5	2	0.556	0	187.707	25	199	NaN	NaN	19.95	19.841	0
454	2009	11	4	12	24	2	734082	5	110	82	16	0.281	12	0.292	448	1	5	1	5	1.5	0.147	0	190.821	25	194	NaN	NaN	20.2	20.017	1
455	2009	11	4	12	33	20	734082	7.5	128	54	60	0.092	14	0.5	32	3	11	1	7.5	2.5	0.338	0	188.688	19	198.5	NaN	NaN	21.55	20.723	0
456	2009	11	4	12	36	0	734082	29	182	106	30	0.683	46	0.63	3660	1	5	1	13.5	9	0.028	0	177.093	33	NaN	NaN	-1	22.5	20.764	0
457	2009	11	4	13	40	2	734082	190	400	138	126	1.504	136	1.371	394	1	7	1	11	4.5	0.174	0	116.871	41	NaN	NaN	-1	23.25	13.812	3
458	2009	11	4	13	53	16	734082	176.5	384	112	120	1.471	152	1.112	2204	1	5	1	17.5	7.5	0.043	1	117.127	31	NaN	NaN	-1.4	23.25	14.1	2
459	2009	11	4	14	36	24	734082	210.5	356	102	122	1.693	132	1.504	202	1	9	1	21	12	0.183	0	116.005	27	NaN	NaN	3.2	23.25	13.352	1
460	2009	11	4	14	45	42	734082	204.5	352	124	114	1.794	114	1.719	96	1	11	1	25.5	9.5	0.277	1	118.123	35	NaN	NaN	0.6	23.15	14.065	3
461	2009	11	4	14	53	10	734082	207.5	460	226	114	1.82	120	1.654	150	1	21	1	23	9	0.37	1	119.088	63	NaN	NaN	0.3	23.05	13.735	0
462	2009	11	4	15	3	20	734082	223	402	166	108	1.981	128	1.727	222	1	15	1	29	10.5	0.266	1	113.366	45	NaN	NaN	2	23.1	13.536	0
463	2009	11	4	15	13	44	734082	233	328	82	114	1.978	132	1.761	214	1	9	1	15	8	0.151	1	109.244	25	NaN	NaN	-1.6	23.25	13.243	0
464	2009	11	4	15	22	46	734082	259	334	68	116	2.129	150	1.703	192	1	3	1	19.5	14	0.129	0	103.986	17	NaN	NaN	-2.7	23.25	12.843	0
465	2009	11	4	15	31	32	734082	289.5	446	158	138	2.098	150	1.717	214	1	13	1	49	35	0.239	0	97.672	45	NaN	NaN	-0.8	23.25	12.7	0
466	2009	11	4	15	42	32	734082	322.5	440	96	154	2.081	190	1.697	730	1	11	1	11	2	0.082	0	72.469	15	NaN	NaN	4.4	23.25	10.943	1
467	2009	11	4	16	2	2	734082	280.5	382	78	144	1.917	160	1.681	638	1	5	1	34	11.5	0.076	0	94.306	17	NaN	NaN	-1.2	23.35	12.804	0
468	2009	11	4	16	19	2	734082	248	360	88	124	1.968	148	1.622	246	1	13	1	42	18	0.145	0	109.489	25	NaN	NaN	-1	23.35	13.186	1
469	2009	11	4	16	29	8	734082	255	384	104	128	1.953	152	1.674	314	1	9	1	15.5	7.5	0.149	1	110.547	25	NaN	NaN	-2	23.3	13.149	0
470	2009	11	4	16	40	46	734082	260	466	186	132	1.955	148	1.679	356	1	15	1	79.5	17.5	0.226	1	106.697	53	NaN	NaN	-1.3	23.25	13.015	0
471	2009	11	4	16	54	28	734082	261	366	92	128	2.027	146	1.764	140	1	13	1	30	9.5	0.182	1	102.91	29	NaN	NaN	-0.7	23.45	13.403	0
472	2009	11	4	17	2	54	734082	282.5	406	114	132	2.083	160	1.744	648	1	11	1	42	11.5	0.108	1	99.284	29	NaN	NaN	4.5	23.4	13.189	0
473	2009	11	4	17	20	28	734082	254	364	84	130	1.954	150	1.647	1216	1	9	1	28	7.5	0.053	0	112.767	27	NaN	NaN	0.1	23.6	13.827	0
474	2009	11	4	17	46	48	734082	227	338	100	104	2.159	134	1.69	162	1	9	1	8	2.5	0.2	0	121.569	33	NaN	NaN	0.9	23.6	14.165	0
475	2009	11	4	17	55	8	734082	222.5	328	82	110	1.959	136	1.544	420	1	5	1	22.5	12.5	0.11	1	122.482	23	NaN	NaN	2.9	23.5	14.111	0
476	2009	11	4	18	7	36	734082	217.5	318	48	132	1.648	138	1.547	76	1	1	1	4	4	0.122	1	126.65	13	NaN	NaN	0.7	23.6	14.17	0
477	2009	11	4	18	14	10	734082	217.5	390	158	110	1.964	122	1.721	284	1	17	1	34	9	0.234	1	124.563	41	NaN	NaN	5	23.4	14.074	0
478	2009	11	4	18	25	24	734082	229	366	126	108	2.019	132	1.727	354	1	19	1	26	11.5	0.175	1	117.875	45	NaN	NaN	0.8	23.55	14.05	0
479	2009	11	4	18	37	24	734082	226.5	378	126	114	1.89	138	1.638	764	1	7	1	16.5	11	0.11	1	122.18	41	NaN	NaN	3.1	23.6	14.035	0
480	2009	11	4	18	56	26	734082	212	322	66	114	1.838	142	1.461	588	1	5	1	10	4.5	0.073	1	125.846	17	NaN	NaN	4	23.7	14.254	0
481	2009	11	4	19	11	36	734082	208.5	320	92	108	1.866	120	1.738	874	1	9	1	12	7.5	0.077	1	125.718	27	NaN	NaN	-7.9	23.7	13.888	0
482	2009	11	4	19	31	30	734082	198.5	284	58	102	1.941	124	1.516	180	1	3	1	12	10.5	0.125	1	127.875	17	NaN	NaN	3	23.7	13.988	0
483	2009	11	4	19	39	14	734082	211.5	336	88	118	1.708	130	1.627	228	1	3	1	16	10	0.156	1	123.217	21	NaN	NaN	-0.6	23.6	13.759	0
484	2009	11	4	19	48	38	734082	235	398	122	122	1.84	154	1.523	686	1	7	1	17	11.5	0.113	0	116.093	35	NaN	NaN	2.9	23.5	13.048	0
485	2009	11	4	20	6	42	734082	231	400	122	116	1.884	162	1.41	336	1	7	1	24	12.5	0.166	1	113.222	41	NaN	NaN	3.9	23.6	12.915	0
486	2009	11	4	20	18	58	734082	224	332	84	114	1.952	134	1.586	274	1	13	1	27	12	0.139	1	113.808	25	NaN	NaN	-3.3	23.1	13.723	0
487	2009	11	4	20	29	4	734082	199	340	76	116	1.707	148	1.294	5830	1	3	1	10.5	7.5	0.012	0	121.321	27	183.2	-1.663	6	22.95	13.796	0
488	2009	11	4	22	11	54	734082	27.5	152	92	24	1.146	36	0.556	54	1	11	1	14.5	7.5	0.447	0	184.239	29	NaN	NaN	-3	20.1	16.845	0
489	2009	11	4	22	15	20	734082	11	120	80	18	0.611	22	0.364	50	1	7	1	6	3	0.471	0	193.555	21	NaN	NaN	-4.2	20.4	18.643	0
490	2009	11	4	22	18	10	734082	9	110	64	12	0.75	34	0.191	44238	1	5	1	4.5	2.5	0.001	0	193.136	21	188.5	NaN	NaN	20.85	20.121	0
491	2009	11	5	10	37	18	734082	15.5	146	42	90	0.128	14	1	1604	7	1	1	5.5	4	0.024	0	78.864	13	96.5	NaN	NaN	20.05	18.561	0
492	2009	11	5	11	6	28	734082	48	96	12	36	1.25	48	0.99	310	1	1	1	3.5	3	0.03	0	72.179	5	106.8	NaN	NaN	20.1	17.386	1
493	2009	11	5	11	13	14	734082	111	274	144	66	1.644	64	1.734	534	1	11	1	31.5	14.5	0.178	0	62.164	25	117	NaN	NaN	20.1	15.007	0
494	2009	11	5	11	26	42	734082	122	218	76	74	1.649	68	1.735	128	1	13	1	19	4	0.22	1	86.314	27	153.5	NaN	NaN	19.8	14.54	0
495	2009	11	5	11	32	28	734082	122.5	270	134	58	1.897	78	1.571	152	1	9	1	20.5	13	0.318	1	102.93	29	136	NaN	NaN	19.4	14.52	0
496	2009	11	5	11	39	30	734082	119.5	300	156	62	1.79	82	1.451	232	1	11	1	18	8.5	0.293	1	111.69	41	169	NaN	NaN	19.15	14.454	2
497	2009	11	5	11	48	22	734082	150	320	146	74	1.757	100	1.5	626	1	3	1	21	20	0.154	0	111.125	39	154.5	NaN	NaN	19.4	14.621	2
498	2009	11	5	12	4	8	734083	196	334	112	100	1.915	122	1.484	998	1	13	1	48.5	15.5	0.084	0	100.145	27	NaN	NaN	5	20.2	14.114	0
499	2009	11	5	12	26	20	734083	250.5	444	154	140	1.782	150	1.637	900	1	9	1	30	12	0.115	0	88.679	43	NaN	NaN	-0.4	22.45	13.324	0
500	2009	11	5	12	48	44	734083	254.5	402	104	138	1.815	160	1.575	1138	1	11	1	18.5	4	0.068	1	87.939	29	NaN	NaN	-0.8	22.8	13.401	0
501	2009	11	5	13	14	24	734083	319	476	150	162	1.969	164	1.707	350	1	7	1	47	39.5	0.182	0	75.003	31	NaN	NaN	3.2	22.35	12.344	0
502	2009	11	5	13	28	10	734083	269.5	430	138	134	2.011	158	1.684	322	1	7	1	13.5	6	0.184	0	86.536	43	NaN	NaN	1.5	21.15	13.203	4
503	2009	11	5	13	40	42	734083	276	450	154	132	1.958	164	1.668	734	1	9	1	30	17.5	0.13	1	88.619	41	NaN	NaN	2.1	21.5	11.869	1
504	2009	11	5	14	0	26	734083	275	404	102	140	1.946	162	1.688	320	1	9	1	12	4	0.141	1	83.837	29	NaN	NaN	3.1	21.7	11.737	1
505	2009	11	5	14	12	30	734083	277.5	382	76	140	1.971	166	1.672	170	1	13	1	15.5	3	0.138	1	85.327	23	NaN	NaN	2.7	21.55	11.346	0
506	2009	11	5	14	21	42	734083	278	422	130	126	2.19	166	1.672	310	1	11	1	17	3	0.178	1	87.708	37	187.7	-0.563	6.6	21.6	11.522	0
507	2009	11	5	14	33	54	734083	277	464	154	140	1.932	170	1.629	4380	1	7	1	10.5	6.5	0.032	1	88.881	47	NaN	NaN	4.2	21.6	12.101	2
508	2009	11	5	15	54	38	734083	265	404	94	144	1.84	166	1.446	634	1	5	1	28	25.5	0.091	1	103.51	27	NaN	NaN	1.5	22	13.074	0
509	2009	11	5	16	11	56	734083	264	444	130	140	1.764	174	1.517	244	1	7	1	20.5	16.5	0.189	1	108.799	31	NaN	NaN	-1.2	22	12.67	4
510	2009	11	5	16	23	24	734083	5.5	116	26	82	0.055	8	0.563	386	5	3	1	3	1	0.052	0	207.054	7	218	NaN	NaN	22	21.9	NaN
511	2009	11	5	16	31	46	734083	8	98	14	74	0.108	10	0.7	1302	5	1	1	1	1	0.01	0	204.188	3	216.3	NaN	NaN	22	21.906	NaN
512	2009	11	5	16	55	6	734083	256	480	198	136	1.772	146	1.729	1036	1	17	1	61.5	17.5	0.131	0	98.282	55	NaN	NaN	-0.7	22.1	12.691	0
513	2009	11	5	17	20	22	734083	40.5	78	14	30	1.35	34	1.118	472	1	1	1	2.5	2.5	0.025	0	188.031	3	188	-0.982	6	22.95	21.131	0
514	2009	11	5	17	29	32	734083	204	426	124	146	1.346	156	1.304	850	7	7	1	15	7.5	0.097	0	129.607	31	NaN	NaN	-1.2	22.75	13.874	0
515	2009	11	5	17	50	48	734083	211	422	174	108	1.741	140	1.35	204	1	7	1	69	23	0.278	1	127.17	45	NaN	NaN	-2.7	22.6	14.011	0
516	2009	11	5	18	1	14	734083	235	384	98	126	1.746	160	1.469	120	1	3	1	16	15	0.194	0	121.82	25	NaN	NaN	-2.9	22.4	13.529	0
517	2009	11	5	18	9	38	734083	258.5	504	206	130	1.881	168	1.527	308	1	13	1	32	17.5	0.254	0	114.385	51	NaN	NaN	1.1	22.3	13.125	0
518	2009	11	5	18	23	10	734083	254.5	540	230	142	1.718	168	1.509	314	1	7	1	21.5	10.5	0.269	1	115.371	57	NaN	NaN	2.9	22.35	12.534	2
519	2009	11	5	18	37	24	734083	273.5	382	78	140	1.907	164	1.659	276	1	11	1	26	8.5	0.119	1	103.625	25	NaN	NaN	-2	22.35	11.783	0
520	2009	11	5	18	48	22	734083	281	418	136	140	2.004	142	1.634	238	1	5	1	73.5	49	0.207	1	101.685	41	NaN	NaN	2.2	22.45	12.09	0
521	2009	11	5	18	59	18	734083	278.5	522	210	146	1.884	166	1.654	290	1	19	1	21.5	5.5	0.259	1	100.557	67	NaN	NaN	4.6	22.45	11.928	0
522	2009	11	5	19	12	50	734083	281	476	182	140	1.968	154	1.737	306	1	7	1	25.5	14	0.233	1	101.576	53	NaN	NaN	2.3	22.55	11.638	0
523	2009	11	5	19	25	52	734083	278.5	390	102	138	1.989	150	1.753	204	1	11	1	31.5	15.5	0.172	1	94.139	23	NaN	NaN	3.5	22.4	11.54	0
524	2009	11	5	19	35	46	734083	271.5	454	154	134	1.94	166	1.605	398	1	9	1	24.5	11.5	0.181	1	99.962	43	NaN	NaN	1.5	22.4	11.43	0
525	2009	11	5	19	49	58	734083	345.5	444	72	166	2.069	206	1.672	628	1	7	1	8	2.5	0.067	0	67.818	15	NaN	NaN	5.4	22.35	9.812	0
526	2009	11	5	20	7	50	734083	339	430	102	166	2.042	162	1.809	360	1	7	1	53	46.5	0.129	1	82.981	21	NaN	NaN	3.2	22.45	11.017	0
527	2009	11	5	20	21	0	734083	281	418	126	138	2.025	154	1.792	320	1	11	1	12.5	5.5	0.171	0	94.688	33	NaN	NaN	1.1	22.45	11.459	0
528	2009	11	5	20	33	18	734083	276	430	142	132	2.034	156	1.763	390	1	11	1	14.5	7.5	0.173	1	95.125	47	NaN	NaN	5.4	22.5	11.449	0
529	2009	11	5	20	46	58	734083	275	428	150	130	2.065	148	1.811	380	1	9	1	19.5	7	0.186	1	89.658	33	NaN	NaN	-0.2	22.45	11.556	0
530	2009	11	5	21	0	26	734083	263.5	316	42	120	2.146	154	1.708	298	1	3	1	8.5	6	0.068	1	92.795	15	185.9	-1.374	6.8	22.5	11.843	0
531	2009	11	5	21	10	40	734083	259.5	388	108	128	2.027	152	1.701	446	1	11	1	11	3	0.129	1	98.191	27	NaN	NaN	4.7	22.55	11.955	0
532	2009	11	5	21	24	34	734083	270	400	122	134	2.011	144	1.847	398	1	9	1	11.5	4	0.153	1	89.012	41	NaN	NaN	3.6	22.45	11.794	0
533	2009	11	5	21	37	52	734083	322.5	446	122	162	1.991	162	1.79	550	1	7	1	37.5	32.5	0.122	0	76.536	19	NaN	NaN	-1.3	22.4	11.369	0
534	2009	11	5	21	54	28	734083	280	458	154	144	1.944	160	1.716	546	1	7	1	11.5	6	0.153	0	88.686	41	NaN	NaN	2.6	22.35	11.354	0
535	2009	11	5	22	11	12	734083	265	414	126	136	1.949	152	1.697	426	1	13	1	17	8	0.15	1	92.574	43	NaN	NaN	-1.3	22.4	11.946	0
536	2009	11	5	22	25	12	734083	262	422	138	132	1.958	152	1.701	338	1	7	1	10	3.5	0.182	1	88.604	37	NaN	NaN	3.6	22.45	12.894	1
537	2009	11	5	22	37	52	734083	265	400	114	136	1.941	150	1.763	304	1	15	1	8.5	1.5	0.162	1	83.94	23	NaN	NaN	3.4	22.4	12.069	0
538	2009	11	5	22	49	36	734083	278.5	424	126	138	1.938	160	1.709	294	1	9	1	29	11	0.175	1	78.805	35	NaN	NaN	3.2	22.45	12.267	0
539	2009	11	5	23	1	34	734083	270	378	74	142	1.88	162	1.667	264	1	9	1	18	8	0.115	1	80.046	21	NaN	NaN	4.4	22.35	12.257	0
540	2009	11	5	23	12	16	734083	276	488	198	136	2	154	1.744	216	1	15	1	28.5	7.5	0.281	1	75.582	39	154.5	0.331	7.5	22.35	12.283	1
541	2009	11	5	23	24	0	734083	266.5	386	112	130	2.05	144	1.802	178	1	7	1	12	7.5	0.199	1	74.39	23	NaN	NaN	5.4	22.25	11.788	5
542	2009	11	5	23	33	24	734083	263.5	406	122	136	1.938	148	1.76	200	1	7	1	10	5	0.201	1	69.79	21	NaN	NaN	2	22.1	11.869	4
543	2009	11	5	23	43	30	734083	262	428	142	138	1.899	148	1.753	206	1	11	1	9.5	3.5	0.224	1	61.524	23	169.8	-0.356	6.9	22.2	11.772	2
544	2009	11	5	23	54	4	734083	260	480	190	126	2.056	164	1.567	240	1	13	1	72	33	0.264	1	44.578	23	133.5	NaN	NaN	22.2	12.054	3
545	2009	11	6	0	6	4	734083	261.5	492	206	134	1.94	152	1.72	1508	1	11	1	15	5.5	0.103	1	31.575	1	146.8	NaN	NaN	22.2	11.92	0
546	2009	11	6	0	39	24	734083	12.5	62	10	28	0.339	24	0.521	322	1	1	1	3	3	0.026	0	56.333	3	66.5	NaN	NaN	22.35	22.125	6
547	2009	11	6	0	45	48	734083	9.5	66	22	30	0.283	14	0.536	494	1	3	1	4	2	0.039	0	49.646	1	60	NaN	NaN	22.35	22.35	6
548	2009	11	6	0	55	8	734083	13	64	10	34	0.324	20	0.65	350	1	1	1	2	2	0.024	0	45.667	1	66.8	NaN	NaN	22.4	22.158	6
549	2009	11	6	1	2	2	734083	5.5	40	12	10	0.4	18	0.222	1788	1	1	1	3	1.5	0.007	0	48	1	53.5	NaN	NaN	22.4	22.4	NaN
550	2009	11	6	1	32	30	734083	8	52	4	34	0.221	14	0.571	1236	1	1	1	0.5	0.5	0.003	0	45.833	1	63	NaN	NaN	22.35	22.317	NaN
551	2009	11	6	1	53	58	734083	6	74	28	34	0.176	12	0.417	5442	1	5	1	4	2	0.005	0	48.583	5	66.8	NaN	NaN	22.35	22.327	NaN
552	2009	11	6	3	25	54	734083	7.5	22	4	6	0.917	12	0.583	4230	1	1	1	2.5	2	0.001	0	64.083	1	76.3	NaN	NaN	22.45	22.45	NaN
553	2009	11	6	4	36	46	734083	36	116	42	34	1.029	40	0.637	118	1	3	3	12.5	10.5	0.179	0	57.125	9	76.5	NaN	NaN	22.55	18.716	4
554	2009	11	6	4	40	40	734083	58	100	42	38	1.526	20	2.15	30	1	7	1	28	15	0.323	0	46.477	3	83.5	NaN	NaN	22.5	16.686	0
555	2009	11	6	4	42	50	734083	8.5	48	30	10	0.8	8	1.063	52	1	5	1	16.5	7.5	0.3	0	69.125	5	84	NaN	NaN	22.4	22.406	NaN
556	2009	11	6	4	44	30	734083	5.5	28	8	8	0.688	12	0.333	182	3	1	1	1.5	1.5	0.038	0	67.85	3	72.3	NaN	NaN	22.45	22.49	NaN
557	2009	11	6	4	47	60	734083	68.5	98	4	66	1.023	28	2.393	88	1	1	1	2.5	1.5	0.022	0	46.833	1	74.8	NaN	NaN	22.5	15.867	1
558	2009	11	6	4	51	6	734083	63	236	88	50	1.26	98	0.48	178	1	9	17	53	18.5	0.213	1	49.811	15	90	NaN	NaN	22.45	16.476	3
559	2009	11	6	4	58	0	734083	58.5	80	6	46	1.25	28	2.089	52	1	1	1	1	1	0.045	1	49.875	3	91.5	NaN	NaN	22.45	16.15	0
560	2009	11	6	5	0	12	734083	5	14	4	6	0.833	4	1	2	1	1	1	1	1	0.25	0	74.167	1	83.5	NaN	NaN	22.4	22.4	NaN
561	2009	11	6	5	0	28	734083	5.5	34	10	14	0.357	10	0.4	4	3	3	1	4	1.5	0.263	0	68.75	3	69.8	NaN	NaN	22.4	22.417	NaN
562	2009	11	6	5	1	6	734083	6	18	0	4	1.5	14	0.429	8	1	1	1	0	0	0	1	72	1	73	NaN	NaN	22.4	22.45	NaN
563	2009	11	6	5	1	32	734083	5	38	18	8	0.625	12	0.375	4	1	3	1	3.5	2	0.429	0	69.525	5	85	NaN	NaN	22.45	22.45	NaN
564	2009	11	6	5	2	14	734083	6.5	14	0	10	0.65	4	1.625	0	1	1	1	0	0	0	0	67.25	1	84.3	NaN	NaN	22.45	22.45	NaN
565	2009	11	6	5	2	28	734083	6.5	44	32	6	1.083	6	0.833	80	1	5	1	19.5	5.5	0.258	1	71.309	9	89.5	NaN	NaN	22.45	22.453	NaN
566	2009	11	6	5	4	32	734083	73.5	142	40	42	1.714	60	1.042	86	1	5	1	20.5	11	0.175	0	42.81	5	85.5	NaN	NaN	22.45	15.879	3
567	2009	11	6	5	8	20	734083	67	166	34	76	0.875	56	0.964	84	1	1	1	13.5	13	0.136	1	46.194	7	84.3	NaN	NaN	22.4	16.361	4
568	2009	11	6	5	12	30	734083	48	126	36	30	1.35	60	0.575	44	1	1	3	21	13.5	0.212	0	54.934	9	89	NaN	NaN	22.4	18.066	6
569	2009	11	6	5	15	20	734083	45	154	82	30	1.333	42	1.012	84	1	11	1	24.5	7.5	0.345	1	58.393	11	83.8	NaN	NaN	22.4	18.019	3
570	2009	11	6	5	19	18	734083	20	48	2	18	1.111	28	0.714	190	1	1	1	0	0	0.008	0	63.5	1	71.3	NaN	NaN	22.4	21.175	0
571	2009	11	6	5	23	16	734083	9.5	34	0	18	0.528	16	0.594	148	3	1	3	0	0	0	0	67.5	1	67.8	NaN	NaN	22.2	21.45	4
572	2009	11	6	5	26	18	734083	84	134	54	48	1.729	32	1.906	42	1	5	1	28	23	0.307	0	42.804	5	91.8	NaN	NaN	22.5	15.98	4
573	2009	11	6	5	29	14	734083	6.5	46	2	10	0.65	34	0.191	0	3	1	9	0	0	0.043	0	69.625	1	98.5	NaN	NaN	22.4	22.4	NaN
574	2009	11	6	5	30	0	734083	5.5	18	4	10	0.45	4	1.125	110	3	1	1	2	1	0.031	0	72.917	1	76.8	NaN	NaN	22.4	22.433	NaN
575	2009	11	6	5	32	8	734083	30.5	74	24	24	1.271	26	1.038	4	1	3	1	11.5	4	0.308	0	62.25	9	80	NaN	NaN	22.5	21.123	4
576	2009	11	6	5	33	26	734083	10	30	14	8	0.938	8	1.25	92	1	3	1	5.5	4	0.115	0	73.406	5	91.8	NaN	NaN	22.45	22.438	NaN
577	2009	11	6	5	35	28	734083	74	110	14	50	1.43	46	1.565	10	1	1	1	4.5	2.5	0.117	0	46.938	1	94.8	NaN	NaN	22.5	16.069	3
578	2009	11	6	5	37	28	734083	11	46	0	20	0.55	26	0.423	210	5	1	5	0	0	0	0	68.75	1	82.3	NaN	NaN	22.35	22.4	NaN
579	2009	11	6	5	41	44	734083	90.5	192	56	50	1.55	86	1.052	114	1	3	3	16	14.5	0.183	0	44.414	7	89	NaN	NaN	22.5	15.74	0
580	2009	11	6	5	46	50	734083	56	70	28	26	1.712	16	2.656	40	1	1	1	25	13.5	0.255	0	53.483	3	76	NaN	NaN	22.45	17.603	0
581	2009	11	6	5	48	40	734083	6.5	30	0	14	0.464	16	0.406	0	3	1	3	0	0	0	0	67	1	95.5	NaN	NaN	22.4	22.45	NaN
582	2009	11	6	5	49	10	734083	7	22	8	4	1.25	10	0.6	76	1	1	1	3	2	0.082	1	81.65	1	72.8	NaN	NaN	22.45	22.45	NaN
583	2009	11	6	5	50	48	734083	51	94	10	48	1.063	36	1.264	58	1	3	3	6.5	6	0.066	0	57.375	1	93.3	NaN	NaN	22.5	17.192	1
584	2009	11	6	5	53	20	734083	8	30	2	18	0.444	10	0.8	182	1	1	3	0	0	0.009	0	80	1	90.5	NaN	NaN	22.45	22.45	NaN
585	2009	11	6	5	56	52	734083	77.5	128	22	62	1.202	44	1.523	86	1	1	1	13.5	10.5	0.103	0	46.583	7	82.8	NaN	NaN	22.5	15.954	2
586	2009	11	6	6	0	26	734083	6	30	2	20	0.3	8	0.75	0	3	1	3	0	0	0.067	0	70.875	1	92.8	NaN	NaN	22.45	22.45	NaN
587	2009	11	6	6	0	56	734083	7	40	0	8	0.875	32	0.219	172	1	1	5	0	0	0	0	83	1	94.5	NaN	NaN	22.5	22.5	NaN
588	2009	11	6	6	4	28	734083	85	148	8	80	1.063	60	1.417	256	1	3	1	3	1.5	0.02	0	44.5	3	92.5	NaN	NaN	22.55	15.84	6
589	2009	11	6	6	11	12	734083	71	144	12	62	1.145	70	0.864	140	1	3	7	12.5	11.5	0.042	0	49.179	1	90.3	NaN	NaN	22.55	16.164	4
590	2009	11	6	6	15	56	734083	74	114	38	42	1.357	34	2.044	596	1	5	1	26.5	17.5	0.054	1	48.55	9	80	NaN	NaN	22.45	16.375	3
591	2009	11	6	6	27	46	734083	66	170	70	48	1.323	52	0.923	50	1	3	1	22.5	18	0.318	0	54.354	7	80.3	NaN	NaN	22.5	16.589	0
592	2009	11	6	6	31	26	734083	93	154	76	48	1.802	30	2.417	116	1	7	1	35	20.5	0.281	0	42.942	11	78.3	NaN	NaN	22.4	15.604	1
593	2009	11	6	6	35	56	734083	105.5	218	4	152	0.684	62	1.669	2044	19	1	1	3.5	2	0.002	0	45	1	93.8	NaN	NaN	22.4	15.333	5
594	2009	11	6	7	13	38	734083	10.5	124	64	46	0.163	14	0.75	70	1	7	1	17	8	0.33	0	70.273	13	80	NaN	NaN	22.5	22.5	NaN
595	2009	11	6	7	16	52	734083	29.5	144	34	72	0.34	38	0.776	182	5	3	1	8	6.5	0.104	0	64.125	7	96.8	NaN	NaN	22.5	21.306	12
596	2009	11	6	7	22	18	734083	12	42	4	22	0.432	16	0.688	344	3	1	1	3.5	2.5	0.01	0	71.917	1	81	NaN	NaN	22.45	22.417	NaN
597	2009	11	6	7	28	44	734083	8	106	34	62	0.105	10	0.8	80	3	7	1	8.5	2.5	0.183	0	73.861	7	94.3	NaN	NaN	22.45	22.45	NaN
598	2009	11	6	7	31	50	734083	10.5	82	8	52	0.163	22	0.477	2392	1	1	1	2	2	0.003	0	77.3	3	97.3	NaN	NaN	22.45	22.45	NaN
599	2009	11	6	8	13	4	734083	11	114	18	80	0.1	16	0.688	142	5	1	1	3	3	0.07	1	81.25	5	99	NaN	NaN	22.5	22.55	0
600	2009	11	6	8	17	20	734083	9.5	126	36	72	0.111	18	0.528	2812	3	7	1	8.5	3	0.012	0	73.579	7	97.3	NaN	NaN	22.5	22.511	NaN
601	2009	11	6	9	6	18	734083	74	192	68	44	1.261	80	0.925	534	1	3	1	57.5	38	0.094	0	62.257	9	82.5	NaN	NaN	22.55	18.636	10
602	2009	11	6	9	18	24	734083	100	258	62	122	0.59	74	1.345	1656	3	5	1	33.5	28	0.032	0	47.969	11	75	NaN	NaN	22.55	16.884	9
603	2009	11	6	9	50	18	734083	124	240	100	52	1.702	88	1.386	1000	1	15	1	74.5	36.5	0.081	0	43.186	3	98.5	NaN	NaN	22.65	15.509	7
604	2009	11	6	10	10	58	734083	79	178	46	94	0.84	38	1.934	316	3	3	1	45.5	25.5	0.093	0	57.76	3	95.3	NaN	NaN	22.65	17.785	6
605	2009	11	6	10	19	12	734083	120.5	230	4	148	0.807	78	1.519	196	13	1	1	3	2	0.009	0	41.75	1	95	NaN	NaN	22.7	15.183	12
606	2009	11	6	10	26	18	734083	40.5	100	4	28	1.411	68	0.581	26	1	1	9	2	1	0.032	0	66.917	1	92	NaN	NaN	22.65	20.733	21
607	2009	11	6	10	28	24	734083	131.5	136	4	52	2.471	80	1.606	288	3	1	1	6	3	0.009	0	44.583	1	74.5	NaN	NaN	22.65	15.333	10
608	2009	11	6	10	35	28	734083	74	174	36	52	1.365	86	0.762	116	1	5	3	16.5	9.5	0.124	0	50.789	7	74.8	NaN	NaN	22.7	16.984	19
609	2009	11	6	10	40	18	734083	68	278	168	46	1.315	64	0.805	92	1	19	3	93	22.5	0.454	1	58.971	21	77	NaN	NaN	22.7	18.684	9
610	2009	11	6	10	46	28	734083	73.5	136	18	76	0.961	42	1.738	2	5	3	1	12	6	0.13	1	50.4	5	100.3	NaN	NaN	22.65	15.585	5
611	2009	11	6	10	48	46	734083	9.5	44	4	24	0.375	16	0.594	2	1	1	1	0.5	0.5	0.087	0	76.083	1	101.5	NaN	NaN	22.45	22.567	NaN
612	2009	11	6	10	49	32	734083	7	36	22	6	0.917	8	0.625	138	1	5	1	20.5	6	0.126	0	79.25	5	90.5	NaN	NaN	22.6	22.638	NaN
613	2009	11	6	10	52	26	734083	61.5	94	4	58	1.034	32	1.891	442	1	1	1	2.5	1.5	0.007	0	56.667	1	98.8	NaN	NaN	22.7	16.55	1
614	2009	11	6	11	1	22	734083	32.5	70	42	18	1.556	10	2.8	70	1	5	1	30	14	0.3	0	79.557	11	100	NaN	NaN	22.75	21.614	10
615	2009	11	6	11	3	42	734083	5	144	2	136	0.037	6	0.833	226	13	1	1	0	0	0.005	0	101.875	1	106	NaN	NaN	22.75	22.75	NaN
616	2009	11	6	11	9	52	734083	163.5	242	2	114	1.434	126	1.298	918	1	1	1	0	0	0.002	0	44.125	1	108.5	NaN	NaN	22.8	14.8	4
617	2009	11	6	11	29	12	734083	262	388	82	142	1.842	164	1.595	2520	1	7	1	4	1	0.028	0	48.054	15	128.8	NaN	NaN	22.75	12.19	6
618	2009	11	6	12	17	40	734084	247	412	122	132	1.871	158	1.56	1022	1	13	1	12	2	0.085	1	88.855	41	NaN	NaN	3.8	22.75	12.941	4
619	2009	11	6	12	41	34	734084	227.5	456	198	122	1.865	136	1.673	396	1	19	1	16	2.5	0.232	1	100.838	55	NaN	NaN	-4.3	22.75	13.27	4
620	2009	11	6	12	55	46	734084	248.5	388	98	130	1.865	160	1.553	264	1	9	1	11	6	0.15	1	93.41	27	NaN	NaN	0.9	22.65	13.084	0
621	2009	11	6	13	6	38	734084	269.5	408	108	136	1.963	164	1.625	1490	1	11	1	21.5	4	0.057	1	83.182	33	NaN	NaN	0.9	22.65	12.784	6
622	2009	11	6	13	38	16	734084	219	380	134	110	1.982	136	1.607	756	1	25	1	30.5	4	0.118	0	110.338	43	NaN	NaN	-4.4	22.75	13.023	1
623	2009	11	6	13	57	12	734084	222.5	352	106	112	1.969	134	1.657	7090	1	17	1	17.5	2.5	0.014	1	109.241	33	NaN	NaN	-1.5	22.8	13.153	3
624	2009	11	6	16	1	14	734084	283	456	142	152	1.842	162	1.744	2824	1	13	1	12.5	3.5	0.043	0	93.306	45	NaN	NaN	1.5	23.05	12.503	0
625	2009	11	6	16	55	54	734084	264	420	114	140	1.868	166	1.587	316	1	7	1	6	2.5	0.155	1	99.543	31	NaN	NaN	-7.8	23.05	13.13	0
626	2009	11	6	17	8	10	734084	264.5	488	182	142	1.859	164	1.607	188	1	15	1	16.5	4	0.269	1	91.128	55	NaN	NaN	-0.9	22.95	13.049	0
627	2009	11	6	17	19	26	734084	261.5	414	130	130	1.988	154	1.698	240	1	17	1	15	3	0.199	1	95.152	43	NaN	NaN	-4.7	22.85	13.049	0
628	2009	11	6	17	30	20	734084	256	464	170	140	1.825	154	1.64	154	1	15	1	17	3.5	0.275	1	102.52	43	NaN	NaN	-4.5	22.9	13.071	0
629	2009	11	6	17	40	38	734084	249	428	166	122	2.012	140	1.775	280	1	17	1	16	3.5	0.234	1	101.503	53	NaN	NaN	0.1	22.8	13.077	3
630	2009	11	6	17	52	26	734084	248	376	102	128	1.934	146	1.695	824	1	15	1	8	1	0.085	1	104.837	29	NaN	NaN	5.4	22.9	13.103	0
631	2009	11	6	18	12	26	734084	258	374	64	144	1.771	166	1.554	2292	1	3	1	4	3	0.024	1	111.455	17	NaN	NaN	-0.1	23.25	12.903	0
632	2009	11	6	18	56	52	734084	283.5	388	100	134	2.097	154	1.841	560	1	13	1	34.5	5	0.105	1	94.598	21	NaN	NaN	5.9	23.2	12.673	1
633	2009	11	6	19	12	40	734084	285.5	384	68	148	1.912	168	1.699	2426	1	11	1	19.5	4.5	0.024	1	86.886	21	NaN	NaN	1.5	23.15	12.561	0
634	2009	11	6	19	59	30	734084	27	62	14	20	1.35	28	0.714	282	1	1	1	7	7	0.041	0	185.781	7	222.5	-0.209	9.4	23.3	18.019	3
635	2009	11	6	20	5	14	734084	278	486	162	156	1.776	168	1.655	1686	1	21	1	16	2.5	0.075	0	93.357	53	NaN	NaN	0.2	23.35	11.795	0
636	2009	11	6	20	41	26	734084	262	434	118	148	1.757	168	1.56	222	1	13	1	13	3.5	0.18	1	99.717	37	NaN	NaN	2.5	23.25	12.898	0
637	2009	11	6	20	52	22	734084	262.5	450	158	128	2.027	164	1.601	530	1	13	1	14	3	0.161	1	96.428	45	NaN	NaN	0.5	23.15	12.846	0
638	2009	11	6	21	8	42	734084	266	402	110	134	1.922	158	1.684	2118	1	9	1	17.5	8.5	0.044	1	92.5	37	NaN	NaN	3.5	23.25	12.798	0
639	2009	11	6	21	50	42	734084	245.5	476	182	126	1.94	168	1.446	290	1	7	1	7.5	3	0.238	1	101.56	55	NaN	NaN	1.2	23.2	12.956	1
640	2009	11	6	22	3	28	734084	242	446	182	110	2.182	154	1.558	620	1	17	1	18	3.5	0.171	1	102.207	51	NaN	NaN	4.6	23.1	12.917	0
641	2009	11	6	22	21	14	734084	226.5	386	130	116	1.909	140	1.571	778	1	15	1	43.5	7.5	0.112	1	99.17	37	NaN	NaN	1.3	23	13.116	0
642	2009	11	6	22	40	38	734084	210	374	130	114	1.842	130	1.573	276	1	17	1	32.5	5.5	0.2	1	102.674	33	NaN	NaN	1	22.75	13.333	0
643	2009	11	6	22	51	28	734084	211	340	88	112	1.821	140	1.504	406	1	11	1	21.5	7	0.118	1	100.061	25	NaN	NaN	2.8	22.6	13.369	0
644	2009	11	6	23	3	54	734084	219	382	142	120	1.783	120	1.708	160	1	21	1	70	15	0.262	1	91.819	37	NaN	NaN	4.6	22.75	13.789	1
645	2009	11	6	23	12	56	734084	192.5	362	122	116	1.638	124	1.544	250	1	19	1	22.5	3.5	0.199	0	100.411	43	176.1	-0.727	6.8	22.55	13.773	1
646	2009	11	6	23	23	8	734084	192.5	348	120	112	1.714	116	1.595	156	1	11	1	16	7.5	0.238	1	104.496	35	NaN	NaN	4.2	22.4	13.746	0
647	2009	11	6	23	31	32	734084	189	324	100	102	1.809	122	1.537	144	1	9	1	12	4.5	0.214	1	98.431	27	NaN	NaN	3.3	21.45	13.779	0
648	2009	11	6	23	39	20	734084	190	268	60	100	1.9	108	1.727	102	1	9	1	9.5	4	0.162	1	92.347	17	NaN	NaN	1.4	22.2	13.803	0
649	2009	11	6	23	45	30	734084	191	294	92	94	1.979	108	1.731	106	1	5	1	21	8.5	0.23	1	87.106	25	169	NaN	NaN	22.15	13.851	0
650	2009	11	6	23	52	10	734084	190.5	420	218	90	2.061	112	1.67	124	1	21	1	36.5	7	0.401	1	76.307	47	138.5	NaN	NaN	22.1	13.893	2
651	2009	11	7	0	1	14	734084	192	416	198	106	1.807	112	1.71	268	1	7	1	13	5.5	0.289	1	55.1	29	125.3	NaN	NaN	22.65	14.089	1
652	2009	11	7	0	12	38	734084	197	400	174	106	1.783	120	1.592	1326	1	11	1	70	19	0.101	1	34.33	1	93.8	NaN	NaN	22.65	14.179	0
653	2009	11	7	0	41	24	734084	8.5	60	24	22	0.341	14	0.429	202	1	1	1	3.5	2.5	0.092	0	57.423	3	80	NaN	NaN	22.55	22.073	0
654	2009	11	7	0	45	46	734084	7.5	38	2	12	0.625	24	0.313	2534	1	1	1	0	0	0.001	0	53.25	1	64.5	NaN	NaN	22.55	20.95	0
655	2009	11	7	1	28	38	734084	113.5	300	144	74	1.52	82	1.378	456	1	11	1	6.5	1	0.19	0	31.764	1	69.3	NaN	NaN	22.75	15.18	4
656	2009	11	7	1	41	14	734084	119	238	52	80	1.475	106	1.123	1492	1	5	1	5	2	0.03	1	34.991	1	64.3	NaN	NaN	22.75	15.231	6
657	2009	11	7	2	10	4	734084	122.5	324	158	86	1.424	80	1.469	2164	1	11	1	14	5	0.064	1	30.931	1	71.5	NaN	NaN	22.75	15.187	4
658	2009	11	7	2	51	32	734084	124	302	144	78	1.571	80	1.481	178	1	15	1	21	5.5	0.3	1	31.812	1	61.8	NaN	NaN	22.7	14.865	2
659	2009	11	7	2	59	32	734084	126	328	170	76	1.553	82	1.494	2728	1	11	1	29.5	8	0.056	1	32.186	1	72.3	NaN	NaN	22.65	15.035	2
660	2009	11	7	3	50	28	734084	159.5	338	146	94	1.665	98	1.612	1914	1	19	1	25.5	5	0.065	0	31.037	1	60.5	NaN	NaN	22.85	13.504	4
661	2009	11	7	4	28	0	734084	169.5	346	134	100	1.68	112	1.478	416	1	7	1	9.5	4	0.176	1	31.757	1	86.8	NaN	NaN	22.8	14.129	3
662	2009	11	7	4	40	42	734084	171.5	412	214	102	1.642	96	1.672	194	1	15	1	33	12.5	0.353	1	29.544	1	74.3	NaN	NaN	22.75	13.983	0
663	2009	11	7	4	50	48	734084	153	400	222	88	1.739	90	1.6	98	1	15	1	22	9	0.446	0	29.826	1	68.5	NaN	NaN	22.65	13.875	0
664	2009	11	7	4	59	6	734084	186	364	154	88	1.756	122	1.508	186	1	9	1	49.5	31.5	0.28	0	33.542	3	94	NaN	NaN	22.5	13.979	0
665	2009	11	7	5	8	16	734084	194	438	226	94	1.761	118	1.644	406	1	13	1	40.5	30	0.268	1	28.978	1	90	NaN	NaN	22.55	13.797	0
666	2009	11	7	5	22	20	734084	184	432	218	102	1.804	112	1.603	146	1	15	1	19.5	7	0.377	1	29.35	1	78.3	NaN	NaN	22.65	13.643	0
667	2009	11	7	5	31	58	734084	160	388	202	86	1.797	100	1.6	102	1	9	1	14.5	5.5	0.412	0	30.267	1	83	NaN	NaN	22.5	13.717	0
668	2009	11	7	5	40	8	734084	176.5	356	162	90	1.806	104	1.543	150	1	13	1	65	16.5	0.32	0	30.457	1	70.3	NaN	NaN	22.45	13.715	0
669	2009	11	7	5	48	34	734084	227	400	138	116	1.884	146	1.551	154	1	1	1	9	8.5	0.249	0	29.668	1	75	NaN	NaN	22.45	13.551	1
670	2009	11	7	5	57	48	734084	31	66	24	28	0.786	14	1.75	42	1	3	1	19.5	9	0.222	0	59.596	5	87.8	NaN	NaN	22.45	17.808	2
671	2009	11	7	5	59	36	734084	9	26	4	16	0.406	6	1.083	76	1	1	1	5	2.5	0.039	0	71.167	1	83.8	NaN	NaN	22.45	22.45	1
672	2009	11	7	6	1	18	734084	14.5	16	2	6	2.333	8	1.813	62	1	1	1	0.5	0.5	0.026	0	63.625	1	79	NaN	NaN	22.55	22.075	7
673	2009	11	7	6	2	36	734084	32.5	138	88	26	1.058	24	1.063	60	1	5	1	37	13.5	0.444	0	65.172	13	86.8	NaN	NaN	22.55	17.733	0
674	2009	11	7	6	5	54	734084	31	156	68	20	1.4	68	0.375	72	1	7	7	20.5	6.5	0.298	1	59.643	7	69.3	NaN	NaN	22.5	17.876	4
675	2009	11	7	6	9	42	734084	33.5	164	92	30	1.05	42	0.583	50	1	7	1	23	11.5	0.43	1	65.793	19	71	NaN	NaN	22.55	17.379	2
676	2009	11	7	6	13	16	734084	22.5	50	10	28	0.804	12	1.833	36	1	1	1	0.5	0.5	0.116	0	58.208	1	67.8	NaN	NaN	22.5	17.892	0
677	2009	11	7	6	14	42	734084	5.5	18	0	10	0.55	8	0.688	20	1	1	1	0	0	0	0	72	1	91.3	NaN	NaN	22.45	22.5	NaN
678	2009	11	7	6	15	20	734084	9.5	70	16	34	0.279	20	0.425	0	3	5	3	6	2.5	0.229	0	72.111	5	75.3	NaN	NaN	22.55	22.533	NaN
679	2009	11	7	6	16	30	734084	5	24	14	6	0.833	4	1.125	42	1	3	1	8.5	4.5	0.212	0	77.063	3	94	NaN	NaN	22.55	22.55	NaN
680	2009	11	7	6	17	36	734084	5	22	10	8	0.438	4	1.125	34	1	1	1	2	1.5	0.179	1	71.167	5	75.3	NaN	NaN	22.55	22.6	0
681	2009	11	7	6	18	32	734084	11	28	4	12	0.667	12	0.917	0	1	1	1	3	3	0.143	0	67.75	1	81.3	NaN	NaN	22.6	22.467	4
682	2009	11	7	6	19	0	734084	6	14	0	8	0.75	6	1	110	1	1	1	0	0	0	0	67.5	1	76.5	NaN	NaN	22.6	22.6	NaN
683	2009	11	7	6	21	4	734084	27.5	94	48	28	0.929	18	1.528	20	1	3	1	12.5	6	0.421	0	67.39	5	81.8	NaN	NaN	22.6	18.054	1
684	2009	11	7	6	22	58	734084	7.5	28	4	8	0.938	16	0.469	48	1	1	3	0	0	0.053	0	79.833	1	83.5	NaN	NaN	22.5	22.467	NaN
685	2009	11	7	6	24	14	734084	41.5	78	4	44	0.898	30	1.35	106	1	1	1	3	2	0.022	0	52	1	70.8	NaN	NaN	22.55	16.633	1
686	2009	11	7	6	27	18	734084	51.5	118	12	80	0.644	26	1.769	16	3	3	1	8.5	7	0.09	0	51.214	3	69.8	NaN	NaN	22.55	16.4	0
687	2009	11	7	6	29	32	734084	8	38	8	18	0.444	12	0.5	202	3	3	1	4	3	0.033	0	71.45	3	89	NaN	NaN	22.4	22.44	NaN
688	2009	11	7	6	33	32	734084	40.5	152	72	42	0.917	38	0.961	66	1	3	1	30	16	0.33	0	62.919	9	86	NaN	NaN	22.6	17.053	3
689	2009	11	7	6	37	10	734084	44	104	16	60	0.733	28	1.286	288	1	3	1	10	9	0.041	1	54.028	5	75.8	NaN	NaN	22.5	16.628	4
690	2009	11	7	6	43	42	734084	38	84	20	30	1.25	34	0.809	54	1	3	3	16	13	0.145	0	61.614	7	84.3	NaN	NaN	22.55	17.277	4
691	2009	11	7	6	46	0	734084	40	132	40	50	0.57	42	0.726	44	1	1	1	21	11.5	0.227	1	60.417	7	82.8	NaN	NaN	22.5	17.124	2
692	2009	11	7	6	48	56	734084	48	104	14	66	0.682	24	2	28	3	3	1	5	4	0.106	0	55.094	3	91.8	NaN	NaN	22.45	16.612	1
693	2009	11	7	6	51	8	734084	5.5	54	38	14	0.321	2	2.25	0	3	7	1	14	4.5	0.704	0	77.287	11	77.8	NaN	NaN	22.4	22.392	NaN
694	2009	11	7	6	52	2	734084	5.5	30	12	4	1.25	14	0.393	126	1	5	1	8.5	4	0.077	1	73.179	3	85	NaN	NaN	22.45	22.493	NaN
695	2009	11	7	6	54	38	734084	27.5	44	8	24	1.146	12	2.167	68	1	3	1	5.5	3.5	0.071	0	65.65	3	96.8	NaN	NaN	22.55	18.14	0
696	2009	11	7	6	56	30	734084	31	78	46	14	2.036	18	1.722	120	1	5	1	6.5	3	0.232	0	66.438	9	86.5	NaN	NaN	22.55	18.402	2
697	2009	11	7	6	59	48	734084	58.5	114	44	42	1.19	28	1.571	18	1	3	3	37	15.5	0.333	0	54.902	3	99.5	NaN	NaN	22.55	17.333	1
698	2009	11	7	7	2	0	734084	9	30	10	10	0.75	10	0.7	16	1	3	1	4.5	2.5	0.217	0	72.125	3	98.3	NaN	NaN	22.4	22.433	NaN
699	2009	11	7	7	2	46	734084	7.5	16	0	8	0.938	8	0.938	118	1	1	1	0	0	0	0	71.25	1	70.3	NaN	NaN	22.5	22.45	NaN
700	2009	11	7	7	5	0	734084	27.5	146	84	30	0.8	32	0.844	52	1	7	1	13	6	0.424	0	76.174	29	94.8	NaN	NaN	22.55	19.691	0
701	2009	11	7	7	8	18	734084	25	78	24	28	0.893	26	0.865	28	1	1	1	2.5	2.5	0.226	1	69.269	5	92.8	NaN	NaN	22.5	20.165	7
702	2009	11	7	7	10	4	734084	35	162	44	88	0.398	30	0.983	52	5	5	1	28.5	16.5	0.206	0	63.587	5	86.8	NaN	NaN	22.5	18.848	0
703	2009	11	7	7	13	38	734084	24	170	126	24	0.771	20	1.025	54	3	7	1	21	6	0.563	0	70.301	35	87.8	NaN	NaN	22.45	19.536	1
704	2009	11	7	7	17	22	734084	28.5	106	30	26	1.077	50	0.47	36	1	1	3	5.5	5	0.211	0	66.844	5	68	NaN	NaN	22.45	17.938	4
705	2009	11	7	7	19	44	734084	48.5	150	20	110	0.427	20	2.25	162	5	3	1	6	4	0.064	0	56.773	5	76.3	NaN	NaN	22.4	16.932	0
706	2009	11	7	7	24	56	734084	42.5	100	10	42	0.833	48	0.885	44	1	3	5	8.5	8	0.069	0	58.667	1	74.8	NaN	NaN	22.45	17.242	0
707	2009	11	7	7	27	20	734084	75.5	100	8	54	1.398	38	1.947	118	1	1	1	1.5	1.5	0.037	0	47	3	89.5	NaN	NaN	22.4	16.17	2
708	2009	11	7	7	30	58	734084	45	96	4	52	0.846	40	1.113	196	1	1	1	1.5	1	0.014	0	57	1	86	NaN	NaN	22.45	16.6	3
709	2009	11	7	7	35	50	734084	46	150	52	54	0.667	44	0.886	52	3	5	3	23	10.5	0.257	1	63.917	9	91	NaN	NaN	22.45	17.135	2
710	2009	11	7	7	39	12	734084	49.5	122	50	60	0.767	12	3.042	116	1	11	1	47.5	15	0.21	1	55.019	13	72.8	NaN	NaN	22.4	16.687	3
711	2009	11	7	7	43	10	734084	36	116	60	30	1.15	26	1	36	1	1	1	11.5	10	0.395	0	68.952	13	72.3	NaN	NaN	22.4	17.703	3
712	2009	11	7	7	45	42	734084	60	72	8	44	1.364	20	2.675	178	1	1	1	6.5	6.5	0.032	0	49.35	1	94.8	NaN	NaN	22.35	16.71	0
713	2009	11	7	7	49	52	734084	72.5	172	36	98	0.74	38	1.434	56	3	3	1	21	18	0.158	0	48.618	5	91.3	NaN	NaN	22.45	16.305	3
714	2009	11	7	7	53	40	734084	65	106	6	70	0.929	30	2.067	104	1	1	1	3	3	0.029	0	50.313	3	96.5	NaN	NaN	22.3	16.4	0
715	2009	11	7	7	57	10	734084	66.5	146	52	44	1.511	50	0.99	44	1	9	1	31	17	0.274	1	50.583	9	97.3	NaN	NaN	22.35	16.417	4
716	2009	11	7	8	0	20	734084	55.5	180	34	106	0.514	40	1.337	68	5	3	1	26	13.5	0.137	0	57.181	7	95.8	NaN	NaN	22.3	16.422	1
717	2009	11	7	8	4	28	734084	78	92	16	42	1.845	34	2.191	68	1	3	1	5	3.5	0.1	0	46.306	3	87.3	NaN	NaN	22.35	16.056	0
718	2009	11	7	8	7	8	734084	5	64	8	38	0.092	18	0.278	136	9	3	1	7.5	4.5	0.04	0	80.8	5	84.8	NaN	NaN	22.35	22.4	NaN
719	2009	11	7	8	10	28	734084	29	134	48	36	0.806	50	0.42	54	1	3	5	9	8	0.255	0	74.51	11	93.5	NaN	NaN	22.45	18.038	6
720	2009	11	7	8	13	36	734084	47.5	136	2	74	0.642	60	0.792	32	1	1	1	0	0	0.012	0	54.25	1	87	NaN	NaN	22.4	16.45	4
721	2009	11	7	8	16	24	734084	16.5	64	24	12	1.25	28	0.571	44	1	3	1	3	1.5	0.222	0	76.558	5	74.3	NaN	NaN	22.35	19.35	2
722	2009	11	7	8	18	12	734084	56	160	6	98	0.571	56	1	34	1	1	1	0	0	0.031	0	55.938	3	93.8	NaN	NaN	22.4	16.313	2
723	2009	11	7	8	21	26	734084	26	58	4	24	1.083	30	0.85	36	1	1	1	0.5	0.5	0.043	0	68.917	1	96.8	NaN	NaN	22.3	18.717	6
724	2009	11	7	8	23	0	734084	38.5	152	64	44	0.807	44	0.659	58	1	5	1	15.5	9.5	0.305	0	67.962	11	96.5	NaN	NaN	22.4	17.265	7
725	2009	11	7	8	26	30	734084	32	190	84	72	0.368	34	0.941	48	5	9	1	18.5	7	0.353	0	67.517	19	89	NaN	NaN	22.35	20.255	10
726	2009	11	7	8	30	28	734084	44.5	172	78	40	0.8	54	0.824	150	1	7	5	21.5	15.5	0.242	0	63.719	13	89.8	NaN	NaN	22.4	19.61	2
727	2009	11	7	8	35	50	734084	28.5	102	56	22	1.227	24	0.833	38	1	3	1	13	10	0.4	0	74.603	15	91.5	NaN	NaN	22.4	19.04	0
728	2009	11	7	8	38	10	734084	55.5	138	20	74	0.703	44	1.216	150	3	1	3	5.5	3.5	0.069	0	52.773	5	93.8	NaN	NaN	22.4	16.709	0
729	2009	11	7	8	42	58	734084	57	134	46	36	1.236	52	1.096	44	1	7	1	20.5	15.5	0.258	1	54.615	5	92.3	NaN	NaN	22.4	17.86	15
730	2009	11	7	8	45	56	734084	43.5	170	114	30	1.383	26	1.173	54	1	9	1	63	20.5	0.509	0	61.677	15	88.3	NaN	NaN	22.4	20.082	0
731	2009	11	7	8	49	40	734084	51	198	18	156	0.266	24	2.125	164	9	5	1	21.5	14.5	0.05	0	57.6	5	88.8	NaN	NaN	22.4	20.55	0
732	2009	11	7	8	55	42	734084	28	116	62	22	1.227	32	0.625	36	1	3	1	17	12	0.408	0	79.547	15	95	NaN	NaN	22.45	20.313	3
733	2009	11	7	8	58	14	734084	24	112	70	18	1.25	24	0.854	30	1	7	1	12	3.5	0.493	0	74.944	17	94.5	NaN	NaN	22.4	20.731	8
734	2009	11	7	9	0	36	734084	47	86	32	36	1.306	18	2.278	2	1	3	1	8	6	0.364	0	61.088	7	96.5	NaN	NaN	22.4	18.397	2
735	2009	11	7	9	2	4	734084	11	22	4	6	1.667	12	0.75	38	1	1	1	3	2	0.067	0	84.583	1	78.5	NaN	NaN	22.3	22.35	NaN
736	2009	11	7	9	3	4	734084	37.5	116	66	28	1.107	22	1.273	36	1	3	1	35	16	0.434	0	71.647	17	72.8	NaN	NaN	22.4	19.59	2
737	2009	11	7	9	5	36	734084	77.5	150	4	86	0.866	60	1.267	36	5	1	1	4.5	3	0.022	0	48.167	1	96.5	NaN	NaN	22.4	16.2	8
738	2009	11	7	9	8	42	734084	111	162	18	76	1.461	68	1.544	76	1	1	3	6	6	0.076	0	43.675	3	91	NaN	NaN	22.35	15.92	5
739	2009	11	7	9	12	40	734084	79.5	176	54	88	0.903	34	2.176	176	3	7	1	16.5	7	0.153	0	47.286	9	98	NaN	NaN	22.4	15.982	0
740	2009	11	7	9	18	32	734084	35.5	142	74	32	0.875	36	0.986	52	1	5	1	11.5	8	0.381	0	69.401	19	91.8	NaN	NaN	22.4	19.699	11
741	2009	11	7	9	21	46	734084	36.5	150	92	30	1.183	28	1.018	46	1	11	1	17	8	0.469	1	68.5	21	92.8	NaN	NaN	22.4	20.267	12
742	2009	11	7	9	25	2	734084	38	146	66	40	0.9	40	0.787	78	1	7	1	16.5	6.5	0.295	1	70.662	17	94	NaN	NaN	22.4	19.437	7
743	2009	11	7	9	28	46	734084	56.5	108	4	52	1.019	52	1.038	48	1	1	3	6	3.5	0.026	0	53.5	1	91.5	NaN	NaN	22.45	18.217	13
744	2009	11	7	9	31	22	734084	68	150	14	86	0.564	50	1.35	74	7	1	1	20	19.5	0.063	0	58.156	1	86	NaN	NaN	22.4	17.212	5
745	2009	11	7	9	35	6	734084	40	158	88	36	1.083	34	0.912	42	1	9	1	17	9.5	0.44	0	67.144	19	82	NaN	NaN	22.4	20.259	8
746	2009	11	7	9	38	26	734084	75.5	202	22	124	0.605	56	1.295	56	3	1	1	3.5	3	0.085	0	47.917	5	79.8	NaN	NaN	22.4	16.279	1
747	2009	11	7	9	42	44	734084	47	158	86	36	1.306	36	0.944	58	1	5	1	32	13	0.398	0	63.517	17	90.8	NaN	NaN	22.35	19.452	18
748	2009	11	7	9	46	20	734084	31.5	162	92	30	0.967	40	0.762	808	1	7	1	13.5	3	0.095	0	70.404	17	78.3	NaN	NaN	22.4	20.354	14
749	2009	11	7	10	2	30	734084	32	146	78	36	0.889	32	0.906	780	1	9	1	19	7	0.084	1	75.8	17	93.8	NaN	NaN	22.45	19.674	7
750	2009	11	7	10	17	56	734084	35.5	160	86	32	1.016	42	0.798	488	1	5	1	13	4.5	0.133	0	72.506	15	97	NaN	NaN	22.45	19.647	10
751	2009	11	7	10	28	44	734084	93.5	184	40	72	1.153	72	1.243	178	1	3	1	16.5	11.5	0.11	0	46.75	3	91.8	NaN	NaN	22.45	15.933	9
752	2009	11	7	10	34	46	734084	43.5	170	90	34	1.118	46	0.783	398	1	7	1	23	9.5	0.158	0	65.413	17	96.3	NaN	NaN	22.4	19.791	16
753	2009	11	7	10	44	14	734084	62.5	180	70	62	1.008	48	1	164	1	9	1	39.5	22.5	0.203	0	55.806	13	83.5	NaN	NaN	22.4	16.844	5
754	2009	11	7	10	49	58	734084	52	184	88	52	0.769	44	0.977	1306	3	5	1	24	12	0.059	0	66.422	13	99	NaN	NaN	22.4	17.914	7
755	2009	11	7	11	14	48	734084	41.5	120	46	30	1.383	44	0.705	42	1	5	1	13.5	11	0.284	0	100.427	11	108	NaN	NaN	22.4	18.317	8
756	2009	11	7	11	17	30	734084	56.5	176	70	30	1.467	76	0.743	46	1	11	3	45.5	17	0.315	0	93.285	25	112.5	NaN	NaN	22.3	17.497	10
757	2009	11	7	11	21	12	734084	68	218	132	46	1.457	40	1.325	58	1	21	1	84	25	0.478	0	101.265	35	136.5	NaN	NaN	22.3	17.176	1
758	2009	11	7	11	25	48	734084	76.5	214	142	34	1.706	38	1.526	58	1	19	1	75	25	0.522	0	106.056	49	123.8	NaN	NaN	22.25	16.337	7
759	2009	11	7	11	30	20	734084	107.5	260	134	54	1.639	72	1.458	644	1	19	1	87.5	24	0.148	0	104.857	43	165.5	NaN	NaN	22.2	15.673	5
760	2009	11	7	11	45	24	734084	158.5	242	24	96	1.646	122	1.201	988	1	1	1	12.5	12	0.02	0	110.231	9	NaN	NaN	1.3	22.4	14.654	0
761	2009	11	7	12	5	54	734085	177	270	48	102	1.667	120	1.425	236	1	9	1	24	8	0.095	0	102.6	15	NaN	NaN	-4.5	22.4	14.748	0
762	2009	11	7	12	14	20	734085	332	448	96	160	2.053	192	1.729	478	1	15	1	15.5	3.5	0.104	0	54.939	13	NaN	NaN	2.6	22.35	11.306	2
763	2009	11	7	12	29	46	734085	321	476	134	154	2.055	188	1.705	2022	1	9	1	13	4.5	0.054	1	66.162	25	NaN	NaN	1.6	22.4	11.433	3
764	2009	11	7	13	11	24	734085	298	430	98	150	1.983	182	1.635	7062	1	11	1	19	4	0.013	1	83.975	29	202.1	-0.529	11.2	22.5	11.815	1
765	2009	11	7	15	16	16	734085	184	326	108	104	1.74	114	1.61	434	1	5	1	5.5	3	0.142	0	131.618	27	NaN	NaN	0.2	22.75	13.816	3
766	2009	11	7	15	28	56	734085	186	350	166	80	2.212	104	1.788	286	1	17	1	17	9	0.261	1	130.685	51	NaN	NaN	0	22.75	13.457	3
767	2009	11	7	15	39	32	734085	191	338	124	102	1.853	112	1.589	396	1	11	1	22	13	0.169	1	133.258	39	NaN	NaN	-8.3	22.75	13.431	0
768	2009	11	7	15	51	46	734085	191.5	354	148	108	1.759	98	1.49	272	1	7	1	52	45.5	0.236	1	135.723	35	NaN	NaN	3.8	22.75	13.62	0
769	2009	11	7	16	2	12	734085	187	350	102	114	1.636	134	1.325	116	1	7	1	13	9.5	0.219	1	135.755	23	NaN	NaN	3.2	22.7	13.587	0
770	2009	11	7	16	9	58	734085	188	338	88	122	1.537	128	1.469	300	1	7	1	8.5	2.5	0.138	1	136.906	25	NaN	NaN	1.1	22.6	13.65	2
771	2009	11	7	16	20	36	734085	187	314	64	114	1.623	136	1.353	390	1	5	1	7	3	0.091	1	139.144	21	NaN	NaN	-0.2	22.7	13.968	0
772	2009	11	7	16	32	20	734085	183	346	120	108	1.667	118	1.547	660	1	9	1	8.5	3	0.119	1	140.295	29	NaN	NaN	-5.5	22.8	14.076	0
773	2009	11	7	16	49	6	734085	24	50	8	18	1.333	24	0.917	122	1	1	1	2	2	0.047	0	202.2	3	NaN	NaN	-10.9	22.85	18.34	1
774	2009	11	7	16	51	58	734085	205	340	106	124	1.565	110	1.727	144	1	3	1	28	15	0.219	0	130.847	31	NaN	NaN	-2.7	22.8	13.605	1
775	2009	11	7	17	0	2	734085	211.5	372	142	106	1.948	124	1.69	142	1	15	3	19	5.5	0.276	1	129.767	35	NaN	NaN	-1.3	22.7	13.422	0
776	2009	11	7	17	8	36	734085	225	404	150	124	1.774	130	1.719	136	1	9	1	24.5	7.5	0.278	1	123.135	39	NaN	NaN	-2.9	22.65	13.072	0
777	2009	11	7	17	17	36	734085	247	468	202	124	1.73	142	1.739	452	1	5	1	34.5	32.5	0.22	1	120.529	59	NaN	NaN	-1.4	22.65	12.946	0
778	2009	11	7	17	32	56	734085	194.5	336	98	114	1.706	124	1.504	78	1	7	1	15	8	0.237	0	138.775	35	NaN	NaN	-4.3	22.8	13.444	0
779	2009	11	7	17	39	50	734085	235	390	130	112	1.888	148	1.571	92	1	3	1	27	23.5	0.27	0	126.117	27	NaN	NaN	5.8	22.65	13.052	0
780	2009	11	7	17	47	52	734085	242.5	420	166	120	1.992	134	1.679	258	1	7	1	25	18	0.245	1	120.845	43	NaN	NaN	-3.5	22.65	12.801	0
781	2009	11	7	17	59	10	734085	252	468	194	128	1.785	146	1.716	672	1	13	1	36	23.5	0.17	1	121.508	55	NaN	NaN	-2.8	22.75	12.905	2
782	2009	11	7	18	18	10	734085	230.5	394	126	124	1.859	144	1.587	446	1	11	1	10	3.5	0.15	1	125.418	35	NaN	NaN	-4.7	22.9	13.443	0
783	2009	11	7	18	32	10	734085	274.5	466	170	132	1.864	164	1.674	426	1	13	1	37.5	28.5	0.191	0	113.34	55	NaN	NaN	0.6	22.8	12.565	0
784	2009	11	7	18	47	2	734085	277.5	486	178	146	1.88	162	1.694	1330	1	9	1	11	3.5	0.098	1	109.975	53	NaN	NaN	-0.7	22.9	12.846	0
785	2009	11	7	19	17	18	734085	201	328	72	118	1.665	138	1.435	2330	1	11	1	15.5	5.5	0.027	0	129.209	25	NaN	NaN	4	23	13.805	0
786	2009	11	7	20	1	36	734085	241.5	424	158	122	1.893	144	1.622	238	1	5	1	23.5	10.5	0.239	0	117.922	53	NaN	NaN	1.4	23.05	13.324	0
787	2009	11	7	20	12	38	734085	219	402	150	116	1.888	136	1.603	274	1	7	1	5	1.5	0.222	1	123.313	47	NaN	NaN	-4.9	22.9	13.486	0
788	2009	11	7	20	23	54	734085	220.5	448	194	120	1.804	134	1.638	182	1	25	1	18	4	0.308	1	119.089	51	186.6	-1.325	8.5	22.8	13.543	0
789	2009	11	7	20	34	24	734085	224	392	150	110	2.005	132	1.697	146	1	9	1	9.5	4	0.279	1	119.372	43	NaN	NaN	-2.1	22.8	13.488	0
790	2009	11	7	20	43	22	734085	226	448	214	110	2.027	124	1.819	144	1	13	1	9.5	3	0.361	1	117.523	65	NaN	NaN	4.9	22.75	13.501	0
791	2009	11	7	20	53	14	734085	225	380	146	106	2.108	128	1.75	152	1	9	1	7.5	1.5	0.274	1	118.196	39	NaN	NaN	-4.6	22.75	13.526	0
792	2009	11	7	21	2	6	734085	224	408	174	106	2.085	128	1.738	182	1	7	1	7.5	3	0.295	1	118.31	55	NaN	NaN	-3.7	22.75	13.506	0
793	2009	11	7	21	11	56	734085	225	386	138	116	1.909	132	1.705	202	1	15	1	12.5	3.5	0.235	1	115.486	37	NaN	NaN	-1.9	22.75	13.457	0
794	2009	11	7	21	21	44	734085	225	408	186	120	1.858	102	1.691	182	1	11	1	63.5	54	0.315	1	114.878	57	NaN	NaN	2.4	22.7	13.602	0
795	2009	11	7	21	31	34	734085	227.5	442	198	112	2.009	132	1.72	262	1	29	1	24	2.5	0.281	1	102.19	63	NaN	NaN	2.3	22.75	13.571	0
796	2009	11	7	21	43	18	734085	233	422	154	118	1.936	150	1.553	178	1	11	1	12.5	5	0.257	1	109.484	49	NaN	NaN	1	22.55	13.585	0
797	2009	11	7	21	53	18	734085	236.5	380	130	132	1.773	118	1.708	192	1	17	1	54.5	37	0.227	1	105.708	43	NaN	NaN	3.9	22.65	13.733	0
798	2009	11	7	22	2	50	734085	168.5	334	146	78	1.776	110	1.495	146	1	21	1	83	33.5	0.304	0	121.591	51	NaN	NaN	3.8	22.65	14.749	0
799	2009	11	7	22	10	50	734085	230.5	410	166	96	1.833	148	1.551	284	1	11	1	85.5	64.5	0.239	0	108.676	41	NaN	NaN	-5.4	22.65	13.824	0
800	2009	11	7	22	22	24	734085	165	308	114	86	1.791	108	1.444	180	1	19	1	53	13.5	0.234	0	118.513	37	NaN	NaN	-5.3	22.7	14.982	5
801	2009	11	7	22	30	32	734085	164	310	122	86	1.64	102	1.422	258	1	11	1	65	30	0.215	1	123.137	31	NaN	NaN	-4.8	22.7	15.182	3
802	2009	11	7	22	40	0	734085	207	348	100	120	1.721	128	1.617	558	1	7	1	3.5	1	0.11	0	110.74	25	NaN	NaN	2.1	22.65	13.961	0
803	2009	11	7	22	55	6	734085	5	46	8	22	0.227	16	0.25	2060	1	3	1	2	1.5	0.004	0	197	1	219	NaN	NaN	22.55	22.6	NaN
804	2009	11	7	23	30	12	734085	148.5	256	48	92	1.592	116	1.28	41974	1	11	1	9	2	0.001	0	113.99	21	NaN	NaN	3	22.8	14.646	3
805	2009	11	8	11	14	2	734085	39	174	74	54	0.602	46	0.848	8868	1	7	1	11.5	6.5	0.008	0	103.783	23	94.3	NaN	NaN	22.55	16.838	7
806	2009	11	8	13	44	44	734086	210.5	512	246	136	1.507	130	1.615	260	1	13	1	15	5.5	0.319	0	121.373	75	NaN	NaN	-10	22.55	14.001	0
807	2009	11	8	13	57	36	734086	219	452	178	122	1.754	152	1.441	380	1	11	1	10	5	0.214	1	117.736	45	NaN	NaN	-5.7	22.4	13.303	2
808	2009	11	8	14	11	28	734086	228.5	410	122	132	1.727	156	1.458	4068	1	7	1	7.5	2	0.027	1	115.21	39	NaN	NaN	-5	22.4	12.501	3
809	2009	11	8	15	26	6	734086	264	444	170	120	2.121	154	1.714	256	1	7	1	12	9	0.243	0	110.552	61	NaN	NaN	-1.5	22.55	11.793	0
810	2009	11	8	15	37	46	734086	258	426	158	122	2.082	146	1.764	196	1	11	1	10.5	4	0.254	1	112.634	47	NaN	NaN	3	22.4	11.813	0
811	2009	11	8	15	48	8	734086	251.5	492	238	118	2.085	136	1.849	172	1	15	1	26.5	8	0.358	1	117.158	69	NaN	NaN	0.2	22.4	12.352	2
812	2009	11	8	15	59	12	734086	255.5	480	206	128	1.965	146	1.736	184	1	17	1	23	4	0.31	1	115.56	63	NaN	NaN	-1.2	22.4	12.715	0
813	2009	11	8	16	10	16	734086	248.5	414	162	120	2.063	132	1.871	290	1	11	1	9.5	2	0.23	1	116.811	53	NaN	NaN	-1.3	22.4	12.912	0
814	2009	11	8	16	22	0	734086	237.5	384	130	118	2	136	1.739	636	1	11	1	8.5	1.5	0.127	1	123.288	35	NaN	NaN	0.4	22.5	13.087	0
815	2009	11	8	16	39	0	734086	233	434	186	110	2.036	138	1.688	304	1	13	1	19	9	0.252	1	126.396	49	NaN	NaN	2.1	22.65	13.16	2
816	2009	11	8	16	51	18	734086	273	508	238	122	2.012	148	1.838	278	1	17	1	41.5	28	0.303	0	113.806	73	NaN	NaN	5.4	22.6	12.543	0
817	2009	11	8	17	4	24	734086	270	438	162	128	2.086	148	1.824	388	1	11	1	9	3	0.196	1	114.701	49	NaN	NaN	2.4	22.6	12.443	0
818	2009	11	8	17	18	10	734086	273	392	100	134	2.019	158	1.725	374	1	3	1	4	2.5	0.131	1	113.289	27	NaN	NaN	2.4	22.7	12.441	0
819	2009	11	8	17	30	56	734086	264	434	166	122	2.111	146	1.808	126	1	5	1	11.5	6.5	0.296	1	117.176	49	NaN	NaN	3.3	22.65	12.728	2
820	2009	11	8	17	40	16	734086	265	414	134	130	2.027	150	1.757	1032	1	9	1	8	2.5	0.093	1	114.61	35	NaN	NaN	-0.2	22.45	12.633	2
821	2009	11	8	18	4	22	734086	237	454	210	114	1.947	130	1.823	370	1	11	1	25	15	0.255	0	126.724	55	NaN	NaN	3.8	22.75	13.238	0
822	2009	11	8	18	18	6	734086	263.5	414	138	126	2.063	150	1.753	208	1	7	1	10	3.5	0.222	0	116.707	41	NaN	NaN	2.2	22.7	13.099	0
823	2009	11	8	18	28	28	734086	272	376	98	128	2.063	150	1.813	530	1	15	1	25	8	0.108	1	109.455	31	NaN	NaN	3.6	22.75	13.088	0
824	2009	11	8	18	43	34	734086	255.5	476	226	114	2.215	136	1.853	380	1	17	1	24.5	4	0.264	1	117.123	71	NaN	NaN	2.4	22.85	13.151	0
825	2009	11	8	18	57	50	734086	245	490	226	120	1.992	144	1.684	286	1	17	1	24.5	6	0.291	1	120.875	71	NaN	NaN	-1.1	22.75	13.266	3
826	2009	11	8	19	10	46	734086	230.5	368	126	116	1.987	126	1.813	434	1	5	1	5	2	0.157	1	124.613	39	NaN	NaN	1.5	22.75	13.362	4
827	2009	11	8	19	24	8	734086	226.5	354	116	114	1.939	124	1.819	1218	1	11	1	28.5	11	0.074	1	125.03	29	NaN	NaN	0.7	22.85	13.429	0
828	2009	11	8	19	50	20	734086	273.5	472	182	130	2.035	160	1.709	1910	1	9	1	16.5	9	0.076	0	108.769	57	NaN	NaN	3.9	22.8	12.964	0
829	2009	11	8	20	30	2	734086	279.5	370	56	146	1.914	168	1.658	624	1	3	1	2	1	0.056	1	104.103	17	NaN	NaN	3	22.85	12.269	1
830	2009	11	8	20	46	36	734086	268	430	122	152	1.76	156	1.715	652	1	11	1	7.5	1.5	0.113	1	104.734	37	NaN	NaN	-3.2	22.9	11.602	2
831	2009	11	8	21	4	38	734086	260	446	166	134	1.922	146	1.771	242	1	13	1	10	2.5	0.241	1	107.741	55	NaN	NaN	-2.8	22.8	11.974	0
832	2009	11	8	21	16	6	734086	262.5	424	142	132	1.947	150	1.747	334	1	9	1	11	5.5	0.187	1	105.542	35	229.2	-0.174	9.1	22.75	11.713	3
833	2009	11	8	21	28	44	734086	274	424	130	136	2.015	158	1.734	202	1	5	1	6	2.5	0.208	1	97.735	45	NaN	NaN	-0.6	22.75	11.375	3
834	2009	11	8	21	39	10	734086	300	522	222	136	2.033	164	1.756	442	1	9	1	62.5	23.5	0.23	1	88.337	73	NaN	NaN	-6.9	22.65	11.49	0
835	2009	11	8	21	55	14	734086	266	468	174	138	1.928	156	1.692	646	1	15	1	10	2	0.156	0	97.207	67	NaN	NaN	-2.9	22.85	11.607	1
836	2009	11	8	22	13	48	734086	257	414	138	106	1.925	170	1.509	2770	1	5	3	55.5	53	0.043	1	96.264	43	NaN	NaN	-0.5	22.75	12.577	1
837	2009	11	8	23	6	52	734086	152.5	226	14	96	1.583	116	1.297	512	1	1	1	2.5	2	0.019	0	121.594	3	189.3	-0.637	25.3	22.75	14.988	8
838	2009	11	8	23	19	10	734086	138	246	68	86	1.547	92	1.457	220	1	9	1	26	5.5	0.146	1	119.264	25	156.4	0.511	6.8	22.7	15.01	1
839	2009	11	8	23	26	56	734086	112.5	230	84	62	1.653	84	1.25	108	1	15	1	54.5	15	0.249	0	123.919	31	NaN	NaN	3.1	22.65	15.48	0
840	2009	11	8	23	32	34	734086	98.5	234	108	56	1.545	70	1.264	220	1	13	1	50	19.5	0.238	0	128.555	37	NaN	NaN	3.5	22.55	15.542	3
841	2009	11	8	23	40	8	734086	99.5	244	114	64	1.43	66	1.447	150	1	11	1	35	15.5	0.289	1	120.427	35	NaN	NaN	5	22.55	15.448	3
842	2009	11	8	23	46	42	734086	84	250	152	40	1.6	58	1.129	74	1	21	1	72.5	21	0.469	0	122.055	51	NaN	NaN	3.5	22.55	15.547	2
843	2009	11	8	23	52	6	734086	60	194	120	30	1.617	44	1.33	62	1	17	1	39	14	0.469	0	121.795	33	140	NaN	NaN	22.45	15.79	0
844	2009	11	8	23	56	22	734086	82	208	120	44	1.602	44	1.307	54	1	7	1	103	43	0.458	0	118.537	35	131	NaN	NaN	22.45	16.252	5
845	2009	11	9	0	0	44	734086	43.5	194	140	24	1.667	30	1.4	56	1	27	1	70	9.5	0.56	0	115.468	43	121	NaN	NaN	22.45	19.656	11
846	2009	11	9	0	4	54	734086	45.5	186	120	20	1.65	46	0.946	64	1	11	3	39.5	12.5	0.48	1	105.418	33	119.3	NaN	NaN	22.55	21.08	16
847	2009	11	9	0	9	4	734086	44	166	86	42	0.774	38	1.066	1486	5	15	1	31	12	0.052	1	93.472	29	130.8	NaN	NaN	22.55	20.172	15
848	2009	11	9	0	36	36	734086	12	44	6	12	1	26	0.442	722	1	1	1	0.5	0.5	0.008	0	61.188	1	84.5	NaN	NaN	22.6	22.638	NaN
849	2009	11	9	0	49	22	734086	22	76	10	28	0.786	38	0.579	1526	1	1	1	0	0	0.006	0	46.042	1	68.3	NaN	NaN	22.6	21.767	17
850	2009	11	9	1	16	4	734086	158.5	302	112	90	1.756	100	1.575	536	1	9	1	5.5	1.5	0.134	0	32.202	1	64.3	NaN	NaN	22.65	14.356	8
851	2009	11	9	1	30	2	734086	145.5	314	146	84	1.702	84	1.732	476	1	11	1	10.5	2.5	0.185	1	31.176	1	62.3	NaN	NaN	22.6	14.384	0
852	2009	11	9	1	43	12	734086	8.5	26	4	4	1.75	18	0.444	518	1	1	1	2	1.5	0.007	0	52.917	1	61.5	NaN	NaN	22.55	22.55	NaN
853	2009	11	9	1	52	16	734086	149	326	138	98	1.495	90	1.656	4968	1	13	1	11.5	2.5	0.026	0	31.407	3	69.3	NaN	NaN	22.6	14.139	0
854	2009	11	9	3	20	30	734086	7.5	106	4	32	0.188	70	0.086	25500	3	1	11	3	1.5	0	0	49.333	1	64.3	NaN	NaN	22.55	22.55	NaN
855	2009	11	9	10	27	16	734086	5	58	6	18	0.278	34	0.118	2420	1	1	5	1	1	0.002	0	75.688	1	92.3	NaN	NaN	22.3	22.425	NaN
856	2009	11	9	11	8	34	734086	19.5	176	112	28	0.696	36	0.403	210	1	11	1	11	5	0.29	0	98.145	39	107.5	NaN	NaN	22.4	20.176	9
857	2009	11	9	11	15	0	734086	25.5	228	148	32	0.781	48	0.469	70	1	13	1	21.5	8.5	0.497	0	111.293	55	123.3	NaN	NaN	22.35	19.408	7
858	2009	11	9	11	19	58	734086	31	220	102	40	0.775	78	0.288	498	1	3	3	14.5	9.5	0.142	0	119.034	23	111	NaN	NaN	22.25	17.669	12
859	2009	11	9	11	31	56	734086	37.5	208	114	42	0.833	52	0.519	3904	1	9	1	19	10.5	0.028	0	142.991	43	NaN	NaN	4.9	22.25	17.445	15
860	2009	11	9	12	40	28	734087	212.5	480	182	124	1.665	174	1.221	1194	1	13	1	15	6	0.109	0	112.269	57	NaN	NaN	-1.2	22.15	14.206	0
861	2009	11	9	13	8	22	734087	244.5	438	162	128	1.883	148	1.642	378	1	15	1	13	3.5	0.199	0	103.796	47	NaN	NaN	0.9	22.05	12.963	7
862	2009	11	9	13	21	58	734087	231.5	452	198	120	1.929	134	1.698	1242	1	9	1	8	4	0.117	1	111.52	55	NaN	NaN	-0.4	22.05	13.592	6
863	2009	11	9	13	50	12	734087	260.5	472	202	126	1.937	144	1.799	1170	1	7	1	21	16.5	0.123	0	106.002	69	NaN	NaN	-5.1	22.15	12.195	0
864	2009	11	9	14	17	34	734087	301	458	138	152	1.964	168	1.783	790	1	7	1	24	10	0.111	0	88.475	37	NaN	NaN	1.8	22.2	11.706	0
865	2009	11	9	14	38	22	734087	278.5	480	198	134	2.075	148	1.882	286	1	13	1	13.5	3.5	0.258	1	100.71	59	NaN	NaN	3.4	22.2	11.746	0
866	2009	11	9	14	51	8	734087	285.5	448	162	136	2.063	150	1.89	754	1	13	1	16	5	0.135	1	97.966	59	NaN	NaN	2.8	22.1	11.676	2
867	2009	11	9	15	11	10	734087	281.5	446	150	138	2.014	158	1.772	380	1	9	1	11	3.5	0.182	1	102.115	53	NaN	NaN	1.7	22.25	11.931	0
868	2009	11	9	15	24	56	734087	274.5	434	142	136	2	156	1.76	220	1	15	1	9.5	2.5	0.217	1	106.122	47	NaN	NaN	2	22.2	12.002	0
869	2009	11	9	15	35	50	734087	275	460	182	126	2.163	152	1.806	262	1	13	1	10	3	0.252	1	103.068	49	NaN	NaN	1	22.2	11.717	0
870	2009	11	9	15	47	52	734087	270.5	416	134	130	2.069	152	1.78	316	1	11	1	10	2.5	0.183	1	104.474	39	222.8	-0.242	11.9	22.25	11.849	1
871	2009	11	9	16	0	4	734087	261.5	408	134	132	1.97	142	1.838	190	1	17	1	11	2	0.224	1	113.051	39	NaN	NaN	4.8	22.3	13.17	0
872	2009	11	9	16	10	2	734087	255	384	112	120	2.117	152	1.674	170	1	9	1	12.5	2	0.202	1	115.404	31	NaN	NaN	1.8	22.3	13.068	0
873	2009	11	9	16	19	16	734087	256	498	234	122	2.086	142	1.803	310	1	21	1	13.5	1.5	0.29	1	115.646	79	NaN	NaN	3.5	22.3	13.066	0
874	2009	11	9	16	32	44	734087	262	406	142	122	2.111	142	1.845	270	1	7	1	7.5	5	0.21	1	115.448	37	NaN	NaN	-0.2	22.4	13.082	0
875	2009	11	9	16	44	0	734087	280	486	206	132	2.121	148	1.858	354	1	13	1	12	5	0.245	1	108.875	57	NaN	NaN	-0.9	22.4	12.363	0
876	2009	11	9	16	58	0	734087	267	434	162	124	2.137	148	1.804	342	1	7	1	5	2	0.209	1	112.814	49	NaN	NaN	0.4	22.45	12.93	2
877	2009	11	9	17	10	56	734087	272.5	432	154	126	2.115	152	1.793	358	1	17	1	17	6	0.195	1	109.013	45	NaN	NaN	2.5	22.5	11.657	0
878	2009	11	9	17	24	6	734087	276	420	134	136	1.996	150	1.84	316	1	13	1	12.5	5.5	0.182	1	110.022	45	NaN	NaN	2.3	22.55	11.634	0
879	2009	11	9	17	36	22	734087	281.5	474	186	136	2	152	1.852	420	1	15	1	17.5	10.5	0.208	1	109.689	57	NaN	NaN	4.5	22.55	11.601	0
880	2009	11	9	17	51	16	734087	269	430	146	134	2.007	150	1.777	2538	1	9	1	8.5	3	0.049	1	113.294	45	NaN	NaN	4.8	22.6	11.527	1
881	2009	11	9	18	40	44	734087	265.5	494	226	120	2.154	148	1.794	346	1	15	1	27	7	0.269	1	113.566	69	NaN	NaN	0.9	22.75	12.811	0
882	2009	11	9	18	54	44	734087	287.5	494	222	124	2.121	148	1.838	198	1	5	1	42	24.5	0.321	1	109.192	65	NaN	NaN	0.9	22.75	12.676	0
883	2009	11	9	19	6	16	734087	267	408	146	122	2.176	140	1.889	258	1	7	1	7	2.5	0.219	1	113.372	47	NaN	NaN	1.1	22.55	11.898	0
884	2009	11	9	19	17	22	734087	267	392	118	128	2.055	146	1.825	280	1	13	1	13.5	4	0.176	1	109.954	31	NaN	NaN	3.1	22.75	11.864	0
885	2009	11	9	19	28	34	734087	266	388	108	128	1.988	152	1.73	286	1	7	1	24.5	13.5	0.16	1	112.282	33	NaN	NaN	5.5	22.75	12.595	0
886	2009	11	9	19	39	48	734087	334	508	178	150	2.17	180	1.778	320	1	13	1	38.5	14	0.215	0	80.939	43	NaN	NaN	-6.1	22.75	11.077	0
887	2009	11	9	19	53	36	734087	336	464	118	154	2.169	192	1.708	434	1	7	1	14	8	0.131	1	79.567	27	NaN	NaN	1.4	22.75	11.085	0
888	2009	11	9	20	8	34	734087	321	446	114	152	2.109	180	1.783	800	1	5	1	8.5	3.5	0.091	1	83.616	31	NaN	NaN	3.5	22.8	11.052	0
889	2009	11	9	20	29	20	734087	313.5	454	138	144	2.177	172	1.762	284	1	9	1	19.5	10.5	0.187	1	86.286	39	NaN	NaN	-0.2	22.85	11.204	0
890	2009	11	9	20	41	38	734087	325	456	130	146	2.14	180	1.778	436	1	3	1	19.5	12.5	0.146	1	81.148	37	172.9	0.559	9.7	22.85	11.336	1
891	2009	11	9	20	56	30	734087	307	460	154	140	2.082	166	1.747	334	1	11	1	43	18	0.194	1	87.516	37	211.6	-0.362	14.2	22.9	11.336	2
892	2009	11	9	21	9	44	734087	294.5	414	120	132	2.008	162	1.735	486	1	9	1	63	30.5	0.133	1	92.484	29	NaN	NaN	-5	22.85	11.837	0
893	2009	11	9	21	24	44	734087	327.5	442	120	160	1.984	162	1.698	2610	1	5	1	64.5	52.5	0.039	0	82.385	31	176.5	0.522	6.1	22.85	11.382	0
894	2009	11	9	22	15	36	734087	265.5	326	24	148	1.794	154	1.591	5386	1	1	1	20.5	20.5	0.004	0	98.481	5	191.8	-20.205	9.5	22.8	12.865	3
895	2009	11	9	23	50	48	734087	115	224	110	60	1.567	54	1.63	88	1	15	1	78	28.5	0.353	0	109.018	37	168.5	NaN	NaN	22.6	14.849	2
896	2009	11	9	23	56	0	734087	98	224	136	46	1.804	42	1.762	86	1	21	1	74	24	0.439	0	106.775	41	130.5	NaN	NaN	22.45	15.029	0
897	2009	11	10	0	1	10	734087	65	208	146	32	1.641	30	1.7	68	1	21	1	71.5	15.5	0.529	0	105.747	49	147.3	NaN	NaN	22.45	15.471	5
898	2009	11	10	0	5	46	734087	45.5	158	92	26	1.654	40	0.838	54	1	13	5	79.5	17	0.434	0	108.415	27	136	NaN	NaN	22.4	17.204	7
899	2009	11	10	0	9	18	734087	42.5	170	122	20	1.7	28	1.518	52	1	11	1	71.5	17.5	0.55	1	100.23	43	135.5	NaN	NaN	22.45	17.098	2
900	2009	11	10	0	13	0	734087	48	166	112	26	1.846	28	1.339	50	1	9	1	58.5	16.5	0.519	0	95.022	35	124.3	NaN	NaN	22.4	16.332	0
901	2009	11	10	0	16	36	734087	47.5	120	38	26	1.635	56	0.67	58	1	7	3	25	11	0.213	1	83.138	13	91	NaN	NaN	22.4	16.063	8
902	2009	11	10	0	19	34	734087	40.5	96	20	32	1.266	44	0.727	50	1	3	5	12.5	9	0.137	0	77.5	5	104.8	NaN	NaN	22.4	17.859	14
903	2009	11	10	0	22	0	734087	43	144	56	30	1.417	58	0.698	3994	1	9	9	28	9	0.014	1	72.948	15	108.3	NaN	NaN	22.5	17.417	2
904	2009	11	10	1	30	58	734087	5	38	12	10	0.45	16	0.219	31086	1	1	1	2	1.5	0	0	51.786	1	58.3	NaN	NaN	22.55	22.6	NaN
905	2009	11	10	10	9	42	734087	22	90	30	36	0.514	24	0.917	24	1	1	1	3.5	3.5	0.263	0	63.297	9	78.5	NaN	NaN	22.6	22.637	3
906	2009	11	10	10	11	36	734087	30	116	72	22	1.227	22	1.364	106	1	3	1	5	3	0.324	0	57.797	11	81.3	NaN	NaN	22.7	20.115	7
907	2009	11	10	10	15	18	734087	38.5	188	114	32	1.125	42	0.917	48	1	9	1	7.5	2.5	0.483	0	56.302	7	86.8	NaN	NaN	22.65	16.208	10
908	2009	11	10	10	19	14	734087	36.5	202	126	38	0.961	38	0.934	90	1	13	1	14	3.5	0.432	1	58.629	17	87	NaN	NaN	22.55	16.23	7
909	2009	11	10	10	24	6	734087	40.5	240	152	36	0.931	52	0.779	1800	1	15	1	14	7.5	0.075	0	57.682	15	75	NaN	NaN	22.55	15.614	9
910	2009	11	10	10	58	6	734087	33.5	182	106	34	0.926	42	0.571	120	1	9	1	16.5	9.5	0.351	0	69.546	25	87.8	NaN	NaN	22.6	20.322	21
911	2009	11	10	11	3	8	734087	44.5	164	56	42	0.952	66	0.561	228	1	7	1	16	8.5	0.143	0	72.052	11	97.5	NaN	NaN	22.55	16.348	21
912	2009	11	10	11	9	40	734087	68	210	52	62	1.097	96	0.5	76	1	1	3	20	20	0.182	0	79.435	5	109	NaN	NaN	22.55	15.574	18
913	2009	11	10	11	14	26	734087	45	168	72	36	1.25	60	0.542	150	1	3	1	19.5	12.5	0.226	0	96.865	21	113.8	NaN	NaN	22.45	17.77	18
914	2009	11	10	11	19	44	734087	154.5	350	144	96	1.599	110	1.391	256	1	9	1	20.5	7	0.238	0	67.325	21	119.8	NaN	NaN	22.55	14.286	1
915	2009	11	10	11	29	50	734087	168.5	360	162	94	1.697	104	1.51	170	1	13	1	38	12.5	0.306	1	86.293	39	126.8	NaN	NaN	22.45	14.285	9
916	2009	11	10	11	38	40	734087	187	326	100	112	1.625	114	1.57	128	1	7	1	26	8	0.22	0	89.868	35	138.3	NaN	NaN	22.45	14.33	0
917	2009	11	10	11	46	14	734087	198.5	412	198	100	1.95	114	1.711	160	1	11	1	27	7.5	0.346	1	93.465	53	144.8	NaN	NaN	22.4	14.275	2
918	2009	11	10	11	55	46	734087	210	394	150	110	1.805	134	1.549	156	1	13	1	73	15.5	0.273	1	91.197	43	NaN	NaN	-0.4	22.4	14.332	3
919	2009	11	10	12	4	56	734088	245	396	122	126	1.897	148	1.655	196	1	3	1	7	6	0.206	0	86.581	33	NaN	NaN	-1.4	22.4	13.644	2
920	2009	11	10	12	14	48	734088	261.5	376	90	132	1.955	154	1.698	294	1	7	1	15.5	4	0.134	1	82.114	23	188.4	-0.254	6.3	22.35	13.135	2
921	2009	11	10	12	25	58	734088	304.5	454	126	142	2.018	186	1.637	340	1	5	1	22	18	0.159	0	74.094	25	NaN	NaN	0.5	22.4	12.821	13
922	2009	11	10	12	39	12	734088	320.5	542	214	158	2.025	170	1.812	2040	1	15	1	21	12.5	0.083	1	67.37	31	NaN	NaN	5.5	22.4	12.184	7
923	2009	11	10	13	22	14	734088	297	450	122	146	2.014	182	1.626	586	1	7	1	9	3	0.118	1	77.282	29	NaN	NaN	2	22.55	12.806	0
924	2009	11	10	13	39	30	734088	331	480	126	150	1.813	204	1.6	1058	1	7	1	68.5	59	0.082	0	72.188	23	NaN	NaN	2	22.55	11.934	1
925	2009	11	10	14	5	8	734088	300.5	422	90	160	1.825	172	1.503	3382	1	9	1	69.5	42	0.024	1	92.543	25	NaN	NaN	-0.4	22.75	12.829	3
926	2009	11	10	15	8	32	734088	305	440	102	164	1.838	174	1.747	168	1	9	1	18.5	6.5	0.168	1	92.606	35	NaN	NaN	3.2	22.75	12.366	0
927	2009	11	10	15	18	40	734088	309	434	118	148	2.074	168	1.833	158	1	15	1	13.5	2.5	0.199	1	91.058	37	NaN	NaN	1.9	22.6	12.429	0
928	2009	11	10	15	28	32	734088	304.5	436	126	140	2.15	170	1.768	250	1	7	1	11.5	4	0.184	1	93.891	35	NaN	NaN	-0.4	22.5	12.268	0
929	2009	11	10	15	39	58	734088	305	442	126	146	2.041	170	1.794	164	1	5	1	11	7	0.208	1	95.281	41	NaN	NaN	0.9	22.65	12.435	0
930	2009	11	10	15	50	4	734088	309	426	130	130	2.35	166	1.861	404	1	11	1	9.5	4	0.157	1	93.58	37	NaN	NaN	1.5	22.5	11.827	0
931	2009	11	10	16	3	54	734088	305.5	494	178	152	1.997	164	1.848	284	1	25	1	19.5	3	0.229	1	96.722	47	NaN	NaN	-0.9	22.65	11.751	0
932	2009	11	10	16	16	52	734088	318	464	150	142	2.032	172	1.846	428	1	5	1	41	29.5	0.168	1	93.171	41	163.5	0.278	7.1	22.6	11.741	0
933	2009	11	10	16	31	44	734088	336	514	154	166	1.967	194	1.732	306	1	15	1	21	10	0.188	1	84.737	41	NaN	NaN	5.5	22.65	11.581	2
934	2009	11	10	16	45	24	734088	326	426	96	152	2.141	178	1.809	396	1	9	1	10.5	4.5	0.117	1	86.25	31	NaN	NaN	-3.7	22.6	11.626	0
935	2009	11	10	16	59	6	734088	16	28	4	14	1.107	10	1.5	38	1	1	1	1.5	1	0.061	0	196.583	1	221	NaN	NaN	22.7	22.55	2
936	2009	11	10	17	0	12	734088	338	468	130	156	2.077	182	1.857	15036	1	5	1	16.5	13.5	0.008	0	86.182	43	NaN	NaN	1.5	22.7	11.402	0
937	2009	11	10	21	18	36	734088	23.5	116	52	32	0.594	32	0.516	168	1	3	1	12.5	7	0.183	0	194.046	15	NaN	NaN	2.9	22.6	16.53	0
938	2009	11	10	21	23	20	734088	229.5	444	190	126	1.798	128	1.793	166	1	13	1	9	3	0.311	0	111.141	65	NaN	NaN	-2.3	22.45	13.363	0
939	2009	11	10	21	33	30	734088	231.5	516	274	116	1.97	126	1.837	152	1	9	1	7	3	0.41	1	109.837	85	NaN	NaN	4.2	22.3	13.301	0
940	2009	11	10	21	44	38	734088	237.5	444	202	108	2.144	134	1.769	140	1	15	1	14.5	6.5	0.346	1	106.257	57	NaN	NaN	-0.5	22.25	13.403	0
941	2009	11	10	21	54	22	734088	236	428	182	118	1.983	128	1.836	140	1	13	1	12	2.5	0.32	1	104.247	59	210.2	-0.356	12.4	22.2	13.49	0
942	2009	11	10	22	3	50	734088	232.5	344	106	114	2.026	124	1.863	180	1	5	1	6	2	0.202	1	99.755	31	NaN	NaN	4.9	22.25	13.561	0
943	2009	11	10	22	12	34	734088	235.5	438	190	114	2.018	134	1.757	212	1	9	1	10.5	5.5	0.292	1	104.487	63	256.4	-0.081	6.6	22.2	13.553	0
944	2009	11	10	22	23	24	734088	233	396	146	116	2.004	134	1.728	146	1	11	1	17	5.5	0.269	1	97.399	41	NaN	NaN	-0.5	22.2	13.584	2
945	2009	11	10	22	32	26	734088	236	382	130	112	2.063	140	1.671	238	1	11	1	15.5	5	0.21	1	96.208	41	NaN	NaN	0.8	22.05	13.4	1
946	2009	11	10	22	42	46	734088	245	352	108	114	2.14	130	1.815	254	1	13	1	17	9	0.178	1	94.745	29	NaN	NaN	4.8	22.2	13.108	1
947	2009	11	10	22	52	52	734088	260.5	432	158	124	2.065	150	1.737	190	1	13	1	10.5	4.5	0.254	1	88.188	47	NaN	NaN	4.7	22.15	12.989	1
948	2009	11	10	23	3	14	734088	173	318	126	82	1.909	110	1.536	126	1	21	3	60.5	23	0.284	0	107.262	41	212.6	-0.19	10.5	22.05	14.598	0
949	2009	11	10	23	10	38	734088	162.5	298	144	82	1.86	72	1.583	116	1	15	1	72.5	49.5	0.348	1	113.247	47	NaN	NaN	1.6	22.15	14.683	3
950	2009	11	10	23	17	32	734088	151	300	158	76	1.809	66	1.667	78	1	15	1	78.5	41	0.418	1	117.369	49	NaN	NaN	5	22.05	14.727	2
951	2009	11	10	23	23	50	734088	151.5	264	96	74	1.993	94	1.543	118	1	15	1	42.5	11	0.251	1	107.638	33	174.6	-0.692	8.7	22	14.713	2
952	2009	11	10	23	30	12	734088	141.5	264	94	82	1.677	88	1.528	112	1	13	1	57	14	0.25	1	111.484	27	NaN	NaN	4.1	22.05	14.747	0
953	2009	11	10	23	36	28	734088	120	274	78	70	1.657	126	0.901	76	1	9	3	66.5	29.5	0.223	0	120.581	25	NaN	NaN	5.7	22.05	14.97	0
954	2009	11	10	23	42	18	734088	139	242	116	64	1.977	62	1.637	68	1	13	1	66	37.5	0.374	0	106.352	39	165.8	NaN	NaN	22	14.767	2
955	2009	11	10	23	47	28	734088	89	244	126	48	1.708	70	1	62	1	15	1	53	19	0.412	0	115.25	45	NaN	NaN	6	21.9	15.249	0
956	2009	11	10	23	52	34	734088	74.5	190	80	42	1.702	68	0.934	50	1	11	3	27	12	0.333	0	110.976	33	162.8	NaN	NaN	21.95	15.409	5
957	2009	11	10	23	56	34	734088	61.5	162	78	32	1.906	52	0.837	48	1	7	3	33.5	18	0.371	0	114.769	23	153.5	NaN	NaN	21.9	15.778	2
958	2009	11	11	0	0	4	734088	101.5	190	6	68	1.493	116	0.845	46	3	1	5	3.5	3.5	0.025	0	97.875	3	140	NaN	NaN	21.95	15.163	0
959	2009	11	11	0	3	60	734088	60	160	82	40	1.425	38	1.579	46	1	11	1	75	34.5	0.398	0	104.417	29	119.3	NaN	NaN	21.95	15.718	0
960	2009	11	11	0	7	26	734088	41	140	86	24	1.708	30	1.067	34	1	9	3	30	15.5	0.494	0	108.903	27	125.3	NaN	NaN	21.9	15.943	3
961	2009	11	11	0	10	20	734088	39.5	178	74	20	1.625	84	0.411	46	1	5	11	40	20	0.33	1	106.059	17	138	NaN	NaN	21.85	16.049	9
962	2009	11	11	0	14	4	734088	16.5	34	4	10	1.4	20	0.7	18	1	1	3	5	2.5	0.077	0	100.333	1	117.8	NaN	NaN	22.05	17.75	0
963	2009	11	11	0	14	56	734088	25.5	92	20	20	1.275	52	0.442	12	1	7	5	7.5	3	0.192	0	87.727	7	96.8	NaN	NaN	22.05	15.945	0
964	2009	11	11	0	16	40	734088	14.5	56	22	8	1.75	26	0.481	0	1	7	3	7.5	2.5	0.393	0	94.854	11	109.3	NaN	NaN	21.95	20.4	9
965	2009	11	11	0	17	36	734088	6.5	108	90	6	1.083	12	0.417	0	1	17	1	32.5	5.5	0.833	0	95.391	31	104.3	NaN	NaN	22.05	22.095	NaN
966	2009	11	11	0	19	24	734088	5	14	4	6	0.667	4	0.875	62	1	1	1	2.5	1.5	0.053	0	101.917	1	84.5	NaN	NaN	22.15	22.15	NaN
967	2009	11	11	0	20	40	734088	39	106	32	32	1.219	42	0.75	50	1	3	3	10.5	7.5	0.205	0	79.206	5	102.5	NaN	NaN	22.15	16.582	6
968	2009	11	11	0	23	16	734088	17	96	58	18	0.944	20	0.75	72	1	5	1	11	3.5	0.345	0	86.792	21	101.3	NaN	NaN	22.1	16.242	1
969	2009	11	11	0	26	4	734088	34.5	128	40	26	0.962	62	0.54	382	1	3	1	12.5	9.5	0.078	0	71.405	9	105	NaN	NaN	22.1	16.181	8
970	2009	11	11	0	34	34	734088	15.5	84	42	18	0.806	24	0.458	116	1	1	1	5.5	4.5	0.21	0	66.716	11	94.3	NaN	NaN	22.2	17.868	5
971	2009	11	11	0	37	54	734088	27	52	8	24	1.125	20	1.325	184	1	3	1	5.5	3	0.034	0	50.8	3	78.8	NaN	NaN	22.15	22.13	24
972	2009	11	11	0	41	50	734088	5	12	0	8	0.625	4	1.25	158	3	1	1	0	0	0	0	60.75	1	67.5	NaN	NaN	22.15	22.15	NaN
973	2009	11	11	0	44	40	734088	8.5	36	10	16	0.531	10	0.65	34	1	3	1	5	3.5	0.143	0	50.583	3	73	NaN	NaN	22.15	22.125	NaN
974	2009	11	11	0	45	50	734088	8	34	14	6	1.25	14	0.571	442	1	3	1	1.5	1	0.029	1	50.469	1	59.8	NaN	NaN	22.15	22.044	5
975	2009	11	11	0	53	46	734088	230	310	36	124	1.726	150	1.527	498	1	1	1	17	16	0.045	0	32.434	1	61.8	NaN	NaN	22.1	13.689	3
976	2009	11	11	1	7	14	734088	191	332	116	106	1.783	110	1.582	178	1	9	1	40	17	0.227	0	31.25	3	66.8	NaN	NaN	22.15	14.534	0
977	2009	11	11	1	15	44	734088	205.5	388	174	104	1.889	110	1.859	324	1	11	1	18	9	0.244	1	29.463	1	62.3	NaN	NaN	22.1	14.041	3
978	2009	11	11	1	27	36	734088	13	66	32	8	1.313	26	0.5	56	1	3	1	3.5	3	0.262	0	45.897	5	58.3	NaN	NaN	22.2	22.006	10
979	2009	11	11	1	29	38	734088	16.5	36	4	12	1.375	20	0.825	560	1	1	1	0	0	0.007	0	48.75	1	59.3	NaN	NaN	22.2	18.533	3
980	2009	11	11	1	39	34	734088	22.5	86	22	34	0.559	30	0.75	916	1	3	1	5.5	3.5	0.022	0	41.875	1	57.3	NaN	NaN	22.1	20.246	6
981	2009	11	11	1	56	16	734088	27	110	46	34	0.765	30	0.883	2744	1	3	1	6.5	3	0.016	0	40.906	3	62.3	NaN	NaN	22.15	20.792	21
982	2009	11	11	2	43	50	734088	15.5	94	44	26	0.423	24	0.625	148	1	5	1	7	4.5	0.182	0	44.489	3	66.3	NaN	NaN	22.15	18.517	3
983	2009	11	11	2	47	52	734088	6.5	116	32	48	0.104	36	0.139	34	5	1	5	3	1.5	0.213	0	47.882	5	62.8	NaN	NaN	22.1	21.965	1
984	2009	11	11	2	50	22	734088	12	90	42	24	0.438	24	0.354	232	1	7	1	9	3.5	0.13	0	46.432	7	69	NaN	NaN	22.05	21.055	1
985	2009	11	11	2	55	44	734088	11	80	36	22	0.477	22	0.386	174	1	1	1	3	2.5	0.142	1	46.382	5	60.5	NaN	NaN	22.1	20.826	3
986	2009	11	11	2	59	58	734088	192	338	120	100	1.87	118	1.627	202	1	9	1	12	5	0.222	0	31.484	1	66.3	NaN	NaN	21.95	14.125	3
987	2009	11	11	3	8	58	734088	216	376	126	114	1.877	136	1.581	148	1	9	1	11	4	0.24	0	30.152	1	65.8	NaN	NaN	21.9	14.217	0
988	2009	11	11	3	17	42	734088	15.5	84	32	32	0.453	20	0.6	142	1	1	1	4.5	3.5	0.142	0	42.882	1	63.5	NaN	NaN	21.65	18.526	1
989	2009	11	11	3	21	28	734088	11	64	24	18	0.528	22	0.386	314	1	3	1	6	2.5	0.063	0	46.423	3	60.5	NaN	NaN	22	21.154	0
990	2009	11	11	3	27	46	734088	165	322	140	96	1.688	86	1.651	108	1	11	1	48	23.5	0.326	0	30.623	1	62.3	NaN	NaN	22.1	14.539	3
991	2009	11	11	3	34	56	734088	183	306	124	90	1.756	92	1.804	146	1	11	1	62	25	0.274	0	31.492	1	61.8	NaN	NaN	21.95	14.475	5
992	2009	11	11	3	42	28	734088	164.5	306	138	82	1.829	86	1.703	156	1	9	1	48.5	19	0.299	0	30.739	1	68.5	NaN	NaN	21.95	14.447	2
993	2009	11	11	3	50	10	734088	172	330	148	100	1.615	82	1.848	138	1	15	1	61	20.5	0.316	1	29.87	1	61.5	NaN	NaN	22	14.421	5
994	2009	11	11	3	57	58	734088	200	342	140	104	1.74	98	1.893	156	1	19	1	67.5	25.5	0.281	0	37.782	3	64.3	NaN	NaN	21.95	14.366	3
995	2009	11	11	4	6	16	734088	197	318	124	92	1.734	102	1.706	134	1	9	1	67.5	37.5	0.274	1	30.631	1	67.8	NaN	NaN	21.85	14.377	2
996	2009	11	11	4	13	48	734088	161.5	294	128	78	1.763	88	1.778	142	1	13	1	64	24	0.294	0	31.081	1	62.5	NaN	NaN	21.85	14.394	8
997	2009	11	11	4	21	4	734088	148	300	138	78	1.84	84	1.685	124	1	15	1	27	6.5	0.325	1	31.007	3	61.8	NaN	NaN	21.85	14.375	0
998	2009	11	11	4	28	8	734088	153	334	162	80	1.775	92	1.663	140	1	11	1	18	11	0.342	1	30.067	1	63.3	NaN	NaN	21.85	14.311	0
999	2009	11	11	4	36	2	734088	157.5	338	162	90	1.717	86	1.703	134	1	23	1	65	11.5	0.343	1	29.887	1	66.5	NaN	NaN	21.8	14.371	5
1000	2009	11	11	4	43	54	734088	158.5	348	174	86	1.843	88	1.705	132	1	17	1	37.5	10	0.362	1	29.557	1	67.5	NaN	NaN	21.7	14.21	0
1001	2009	11	11	4	51	54	734088	155	360	202	78	1.955	80	1.719	122	1	13	1	35	18.5	0.419	1	29.434	1	64	NaN	NaN	21.8	14.194	6
1002	2009	11	11	4	59	56	734088	184	382	194	86	1.872	102	1.691	140	1	13	1	52.5	23	0.372	0	29.265	1	72.5	NaN	NaN	21.8	13.836	2
1003	2009	11	11	5	8	38	734088	143	324	158	78	1.833	88	1.545	126	1	13	3	27	9	0.351	0	30.35	3	65	NaN	NaN	21.65	13.888	4
1004	2009	11	11	5	16	8	734088	134	312	166	70	1.786	76	1.737	128	1	11	1	22	9.5	0.377	1	30.58	1	61	NaN	NaN	21.7	13.843	6
1005	2009	11	11	5	23	28	734088	176.5	346	166	88	1.767	92	1.793	194	1	21	1	61.5	23	0.307	0	29.905	1	64.3	NaN	NaN	21.75	13.855	5
1006	2009	11	11	5	32	28	734088	171	320	134	86	1.791	100	1.675	164	1	17	1	46.5	17	0.277	1	30.603	3	63	NaN	NaN	21.8	13.715	0
1007	2009	11	11	5	40	32	734088	179.5	350	170	78	1.814	102	1.534	590	1	13	1	79	38	0.181	1	30.485	1	70.3	NaN	NaN	21.75	13.892	6
1008	2009	11	11	5	56	12	734088	224.5	404	134	114	1.969	156	1.378	5528	1	11	1	30.5	12.5	0.023	0	32.746	3	63	NaN	NaN	21.8	13.018	0
1009	2009	11	11	7	35	4	734088	6	52	22	18	0.333	12	0.417	134	1	5	1	4	1.5	0.118	0	48.646	3	59	NaN	NaN	21.25	20.887	1
1010	2009	11	11	7	38	10	734088	9	76	28	18	0.417	30	0.233	36	1	3	1	4.5	2	0.25	0	49.433	1	57.5	NaN	NaN	21.25	19.81	3
1011	2009	11	11	7	40	2	734088	9	54	16	14	0.643	24	0.333	132	1	3	1	6	3.5	0.086	1	49.306	1	65.8	NaN	NaN	21.2	20.183	3
1012	2009	11	11	7	43	8	734088	8.5	56	34	12	0.708	10	0.65	40	1	5	1	7	3	0.354	1	49.264	3	64	NaN	NaN	21.2	19.594	0
1013	2009	11	11	7	44	44	734088	6	16	2	4	1.5	10	0.6	14	1	1	3	0	0	0.067	0	53.625	1	58.3	NaN	NaN	21.15	20.45	1
1014	2009	11	11	7	45	14	734088	7.5	70	36	16	0.375	18	0.417	324	5	7	1	18.5	6.5	0.091	0	53.237	7	62.8	NaN	NaN	21.15	20.939	2
1015	2009	11	11	7	51	48	734088	10.5	58	16	30	0.317	12	0.75	32	3	5	1	5.5	1.5	0.178	0	49.083	3	65.3	NaN	NaN	21.15	19.294	2
1016	2009	11	11	7	53	18	734088	34.5	74	26	24	1.438	24	1.271	76	1	3	1	5	4.5	0.173	0	43.571	1	69.8	NaN	NaN	21.15	15.771	0
1017	2009	11	11	7	55	48	734088	5.5	22	0	10	0.55	12	0.458	86	1	1	3	0	0	0	0	49	1	52.3	NaN	NaN	20.75	19.8	2
1018	2009	11	11	7	57	36	734088	5	16	4	4	1.125	8	0.625	120	1	1	1	2.5	1.5	0.029	1	56.417	1	61.3	NaN	NaN	21.15	21.117	NaN
1019	2009	11	11	7	59	52	734088	17.5	60	10	20	0.875	30	0.583	116	1	3	3	1	0.5	0.057	0	50.042	1	61.8	NaN	NaN	21.15	19.067	9
1020	2009	11	11	8	2	48	734088	7	16	0	6	1.167	10	0.7	88	1	1	1	0	0	0	0	48.5	1	50	NaN	NaN	20.85	19.65	0
1021	2009	11	11	8	4	32	734088	14	52	16	16	0.875	20	0.6	36	1	1	1	2	2	0.182	0	49.639	1	66.5	NaN	NaN	21.15	17.489	3
1022	2009	11	11	8	6	0	734088	37	122	36	34	0.838	52	0.683	96	1	5	1	12	9	0.165	0	44.171	3	69	NaN	NaN	21.1	16.466	3
1023	2009	11	11	8	9	38	734088	16.5	114	70	12	1	32	0.469	72	1	5	3	12	4.5	0.376	0	48.653	9	69.3	NaN	NaN	21.1	16.8	1
1024	2009	11	11	8	12	44	734088	16.5	114	80	18	0.861	16	0.813	72	1	7	1	24.5	6	0.43	1	48.396	15	68	NaN	NaN	21.05	18.04	1
1025	2009	11	11	8	15	50	734088	24	96	50	28	0.839	18	0.972	8	1	7	1	17	6.5	0.481	0	44.192	5	69.8	NaN	NaN	21.05	16.821	0
1026	2009	11	11	8	17	34	734088	7	18	4	10	0.7	4	1.75	0	1	1	1	0	0	0.222	0	47.917	1	47	NaN	NaN	20.9	20.933	3
1027	2009	11	11	8	17	52	734088	8	50	24	4	1.625	22	0.295	24	1	5	5	15	7	0.324	0	52.788	3	52.5	NaN	NaN	21	21	NaN
1028	2009	11	11	8	19	6	734088	5.5	46	36	6	0.75	4	1.125	216	1	11	1	15	3.5	0.137	0	51.592	9	60.3	NaN	NaN	21.05	21.05	NaN
1029	2009	11	11	8	23	28	734088	16.5	48	4	14	1.071	30	0.5	76	1	1	3	3	1.5	0.032	0	51.75	1	69.5	NaN	NaN	21.1	17.333	0
1030	2009	11	11	8	25	32	734088	66.5	80	4	32	1.984	44	1.455	298	1	1	1	5.5	3	0.011	0	42	1	52	NaN	NaN	20.15	15.417	3
1031	2009	11	11	8	31	50	734088	6.5	92	0	36	0.181	56	0.116	26	3	1	11	0	0	0	0	57.25	1	78	NaN	NaN	21	20.95	NaN
1032	2009	11	11	8	33	48	734088	5.5	46	20	12	0.333	14	0.393	254	1	3	3	8.5	5	0.067	0	61.25	3	73	NaN	NaN	21	21	NaN
1033	2009	11	11	8	38	48	734088	21.5	126	62	22	0.818	42	0.44	100	1	7	1	10.5	3.5	0.274	0	47.883	5	67.5	NaN	NaN	21	17.828	2
1034	2009	11	11	8	42	34	734088	8.5	26	4	10	0.8	12	0.625	8	1	1	1	1.5	1	0.118	0	57.417	1	82.8	NaN	NaN	20.85	18.483	0
1035	2009	11	11	8	43	8	734088	10.5	50	22	14	0.571	14	0.571	48	1	3	1	6	2.5	0.224	0	54	5	53.5	NaN	NaN	20.15	18.004	2
1036	2009	11	11	8	44	46	734088	18.5	122	80	22	0.795	20	0.7	78	1	9	1	15.5	6.5	0.4	0	51.189	5	66	NaN	NaN	20.85	17.484	4
1037	2009	11	11	8	48	6	734088	24.5	148	94	20	0.95	34	0.706	116	1	9	1	14	6	0.356	0	47.37	7	71.8	NaN	NaN	20.8	17.956	8
1038	2009	11	11	8	52	30	734088	17.5	124	84	22	0.705	18	0.806	142	1	11	1	23	5	0.316	0	51.82	9	75.5	NaN	NaN	20.75	17.612	4
1039	2009	11	11	8	56	56	734088	24.5	156	74	38	0.461	44	0.511	3454	1	9	1	15	8	0.02	0	48.809	5	75.5	NaN	NaN	20.65	17.918	3
1040	2009	11	11	9	57	6	734088	35.5	122	30	50	0.71	42	0.607	3116	1	1	1	10	10	0.009	0	44.672	3	72.8	NaN	NaN	20.85	19.928	9
1041	2009	11	11	10	51	4	734088	13	142	14	16	0.813	112	0.103	110	1	1	7	1.5	1.5	0.056	0	69.656	3	79.5	NaN	NaN	19.4	19.125	10
1042	2009	11	11	10	55	16	734088	8.5	138	98	34	0.221	6	1.083	44	5	7	1	6	2	0.538	0	80.565	31	86.5	NaN	NaN	19.5	18.482	0
1043	2009	11	11	10	58	18	734088	8	140	90	8	0.938	42	0.143	NaN	1	7	1	6.5	2	NaN	1	85.141	17	74	NaN	NaN	19.35	18.88	4
							AVG	133.286	4.29578	1.58303	1.29239	1.37915	1.42036	1.25804	13.3068		8.25983					0.4419
							SD	107.606	2.5274	1.03212	0.803357	0.616344	0.956782	0.543325	71.1476		0.102544
							MAX	448	9.8	4.63333
							SUM		74.675

## Sheet: SCF06_iknos_DiveStat
DiveNumber	Year	Month	Day	Hour	Min	Sec	JulDate	Maxdepth	Dduration	Botttime	DescTime	DescRate	AscTime	AscRate	PDI	DWigglesDesc	DWigglesBott	DWigglesAsc	TotVertDistBot	BottRange	Efficiency	IDZ	LightAtBott	LWiggles	LightAtSurf	Lattenuation	EuphoticDepth	TempAtSurf	TempAtBott	ThermoclineDepth
1	2009	10	31	14	34	58	734078	7	124	70	48	0.115	6	1.083	14	5	7	1	7	2	0.507	0	190.229	25	216.8	NaN	NaN	18.4	18.487	0
2	2009	10	31	14	37	16	734078	8.5	112	82	12	0.583	18	0.417	80	1	7	1	6.5	2	0.427	0	192.524	25	215	NaN	NaN	19.3	18.818	NaN
3	2009	10	31	14	40	28	734078	7	186	52	56	0.089	78	0.077	4	7	9	11	7	2	0.274	0	189.083	15	211.8	NaN	NaN	19.35	18.437	1
4	2009	10	31	14	43	38	734078	8.5	110	14	88	0.068	8	1.063	18	7	1	1	2.5	2.5	0.109	0	203.844	3	197.5	NaN	NaN	19.35	19.2	0
5	2009	10	31	14	45	46	734078	55.5	254	84	136	0.342	34	1.632	3680	3	7	1	14	9	0.021	0	163.099	29	NaN	NaN	-0.1	19.4	14.234	2
6	2009	10	31	15	51	20	734078	23	100	34	30	0.6	36	0.639	290	1	3	1	6	5	0.087	0	201.5	7	NaN	NaN	-9	20.1	17.136	0
7	2009	10	31	15	57	50	734078	29	116	32	38	0.605	46	0.587	876	1	1	1	8	6	0.032	0	195.088	5	NaN	NaN	1.8	20.05	16.703	0
8	2009	10	31	16	14	22	734078	365	542	94	226	1.493	222	1.644	264	1	3	3	30	27	0.117	0	70.505	5	NaN	NaN	1.2	20	8.143	0
10	2009	10	31	18	45	58	734078	5	26	4	14	0.25	8	0.563	620	1	1	1	2	1.5	0.006	0	204.917	1	218	NaN	NaN	20.3	20.2	1
11	2009	10	31	18	56	44	734078	503	614	58	278	1.802	278	1.809	242	1	1	5	2	2	0.068	0	45.6	1	NaN	NaN	0.4	20.45	6.103	1
12	2009	10	31	19	11	0	734078	481.5	682	134	252	1.909	296	1.62	322	1	5	9	5.5	2.5	0.133	1	37.963	1	NaN	NaN	1.5	20.45	6.09	2
13	2009	10	31	19	27	44	734078	464.5	610	94	278	1.669	238	1.95	1184	1	3	3	2	1	0.052	1	39.682	1	NaN	NaN	4.5	20.45	6.26	1
14	2009	10	31	19	57	38	734078	5	24	4	12	0.292	8	0.625	1142	1	1	1	1.5	1.5	0.003	0	202.75	1	208.5	NaN	NaN	20.6	20.583	NaN
15	2009	10	31	20	17	4	734078	397.5	550	150	186	2.118	214	1.855	548	1	5	1	6	3.5	0.137	0	50.977	17	NaN	NaN	4.6	20.65	7.37	0
16	2009	10	31	20	35	22	734078	91.5	170	32	54	1.509	84	1.077	70	1	3	1	13	11	0.133	0	154.191	11	200.5	-0.297	6.3	20.65	13.015	1
17	2009	10	31	20	39	22	734078	5	12	0	6	0.833	6	0.833	6	1	1	1	0	0	0	0	198	1	217.8	NaN	NaN	20.65	20.6	0
18	2009	10	31	20	39	40	734078	79.5	162	36	52	1.519	74	0.973	36	1	1	1	8	7.5	0.182	0	166.25	9	NaN	NaN	2.9	20.65	13.089	0
19	2009	10	31	20	42	58	734078	400.5	504	80	192	2.068	232	1.72	288	1	5	5	7	3.5	0.101	0	48.915	11	NaN	NaN	4.3	20.6	7.378	1
20	2009	10	31	20	56	10	734078	431	672	206	200	2.047	266	1.618	1360	1	3	7	23	21.5	0.101	1	43.404	1	NaN	NaN	5.1	20.65	7.161	2
21	2009	10	31	21	30	2	734078	489.5	636	110	252	1.942	274	1.779	358	1	9	3	7	3	0.111	0	38.714	1	NaN	NaN	5.2	20.65	5.567	1
22	2009	10	31	21	46	36	734078	495	688	146	240	2.029	302	1.589	472	1	3	5	24	15	0.126	1	36.601	1	213	-0.151	6.4	20.7	5.67	1
23	2009	10	31	22	5	56	734078	6.5	54	16	20	0.275	18	0.306	172	1	1	1	2	1	0.071	0	196.361	3	209.5	NaN	NaN	20.65	20.356	1
24	2009	10	31	22	9	42	734078	7.5	56	12	32	0.234	12	0.5	104	3	1	1	1.5	1.5	0.075	0	192.107	3	209.3	NaN	NaN	20.6	20.464	NaN
25	2009	10	31	22	12	22	734078	8	62	26	16	0.469	20	0.325	98	1	5	1	4	2	0.163	1	196.161	7	209.5	NaN	NaN	20.65	20.45	4
26	2009	10	31	22	15	2	734078	15	78	24	28	0.5	26	0.519	100	1	3	1	3.5	1.5	0.135	0	189.115	9	186.5	-1.849	9.8	20.65	19.385	2
27	2009	10	31	22	18	0	734078	21	94	20	36	0.5	38	0.513	36	1	1	1	4.5	3	0.154	0	188.795	5	NaN	NaN	-17.9	20.7	17.405	2
28	2009	10	31	22	20	10	734078	15	86	26	34	0.397	26	0.519	40	1	1	1	3	1.5	0.206	0	192.696	7	NaN	NaN	-13.5	20.7	19.182	3
29	2009	10	31	22	22	16	734078	11	52	2	24	0.458	26	0.423	512	1	1	1	0	0	0.004	0	194.875	1	198	NaN	NaN	20.7	20.35	6
30	2009	10	31	22	31	40	734078	465.5	692	202	246	1.874	244	1.908	326	1	13	1	10.5	4.5	0.198	0	36.044	1	NaN	NaN	3.2	20.65	5.757	0
31	2009	10	31	22	48	38	734078	449.5	628	158	228	1.967	242	1.851	428	1	5	3	5.5	2	0.15	1	37.05	1	NaN	NaN	4.2	20.55	5.931	0
32	2009	10	31	23	6	14	734078	436.5	568	122	206	2.114	240	1.819	622	1	13	1	12	2	0.103	1	38.613	1	NaN	NaN	4.7	20.6	6.249	0
33	2009	10	31	23	26	4	734078	430	604	158	206	2.08	240	1.783	912	1	9	1	11.5	2.5	0.104	1	37.034	1	170.7	-0.522	9.6	20.6	6.244	0
[truncated: 448 more rows]

## Sheet: SCF07_iknos_DiveStat
DiveNumber	Year	Month	Day	Hour	Min	Sec	JulDate	Maxdepth	Dduration	Botttime	DescTime	DescRate	AscTime	AscRate	PDI	DWigglesDesc	DWigglesBott	DWigglesAsc	TotVertDistBot	BottRange	Efficiency	IDZ
[truncated: 388 more rows]

[truncated: 3 more sheets: SCF08_iknos_DiveStat, SCF09_iknos_DiveStat, SCF10_iknos_DiveStat]
