# Supplementary material for: Intraspecific variation in feeding strategies of Galapagos sea lions: A case of trophic specialization
Source: PLoS One. 2017 Oct 23;12(10):e0185165. doi: 10.1371/journal.pone.0185165 (PMC5653192; doi:10.1371/journal.pone.0185165)
Supplement: S3 File — (XLS) [file pone.0185165.s003.xls]

## Sheet: Hoja1
Hembra	Track	C	N
SC01	O	-17.5347	12.2447
SC03	O	-16.6286	13.0293
SC06	O	-16.626	12.7833
SC07	O	-16.5525	12.7053
SC08	O	-16.5749	12.912
SC02	N	-17.3114	13.255
SC04	N	-17.3536	13.774
SC05	N	-17.1834	13.0372
SC09	N	-16.3835	13.6654
SC10	N	-16.9516	13.189
